# Supplementary material
Source: PubMed Central journal article supplement (PMC3419500)
Supplement: NIHMS392155-supplement-Supporting_Information.pdf [file NIHMS392155-supplement-Supporting_Information.pdf]

# **First Enantioselective Total Synthesis of Amphidinolide F**

Subham Mahapatra and Rich G. Carter\*

*Department of Chemistry, Oregon State University, Corvallis, OR 97331*

---

**Electronic Supplementary Information: Experimental**

---

**General.** Infrared spectra were recorded neat unless otherwise indicated and are reported in  $\text{cm}^{-1}$ .  $^1\text{H}$  NMR spectra were recorded in deuterated solvents and are reported in ppm relative to tetramethylsilane and referenced internally to the residually protonated solvent.  $^{13}\text{C}$  NMR spectra were recorded in deuterated solvents and are reported in ppm relative to tetramethylsilane and referenced internally to the residually protonated solvent.

Routine monitoring of reactions was performed using EM Science DC-Alufolien silica gel, aluminum-backed TLC plates. Flash chromatography was performed with the indicated eluents on EM Science Gedurian 230-400 mesh silica gel.

Air and/or moisture sensitive reactions were performed under usual inert atmosphere conditions. Reactions requiring anhydrous conditions were performed under a blanket of argon, in glassware dried in an oven at  $120^\circ\text{C}$  or by flame, then cooled under argon. Dry THF and  $\text{CH}_2\text{Cl}_2$  were obtained via a solvent purification system. All other solvents and commercially available reagents were either purified via literature procedures or used without further purification.

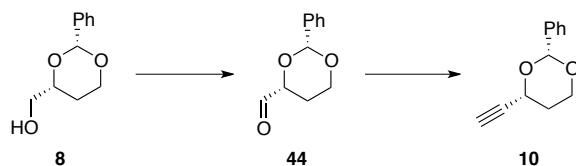

**Alkyne 10:** To a stirred solution of oxalyl chloride (8.88 g, 6.1 mL, 70.0 mmol) in  $\text{CH}_2\text{Cl}_2$  (154.0 mL) at  $-78^\circ\text{C}$  was cannulated a solution of DMSO (11.43 g, 10.4 mL, 146.3 mmol) in  $\text{CH}_2\text{Cl}_2$  (77.0 mL). After 15 min, a solution of alcohol **8**<sup>1</sup> (12.36 g, 63.6 mmol) in  $\text{CH}_2\text{Cl}_2$  (77.0 mL) was cannulated to it. After 45 min,  $\text{Et}_3\text{N}$  (32.20 g, 44.7 mL, 318.2 mmol) was added. After 10 min, the cooling bath was removed and the reaction was quenched with  $\text{H}_2\text{O}$  (150 mL). The aqueous layer was extracted with  $\text{CH}_2\text{Cl}_2$  (3 X 300 mL) and the dried ( $\text{MgSO}_4$ ) extract was concentrated *in vacuo* to give the crude aldehyde **44**.

To a stirred solution of Ohira-Bestmann reagent **9**<sup>2</sup> (18.30 g, 95.4 mmol) in THF (320.0 mL) at  $-78^\circ\text{C}$  was added NaOMe (191.0 mL, 95.5 mmol, 0.5 M in THF) over 30 min. A solution of crude aldehyde in THF (160.0 mL) was cannulated to it and was slowly warmed to  $0^\circ\text{C}$  over 2.5 h. The reaction was quenched with sat. aq.  $\text{NH}_4\text{Cl}$  (150 mL) and the aqueous layer was extracted with  $\text{CH}_2\text{Cl}_2$  (3 X 300 mL). The dried ( $\text{MgSO}_4$ ) extract was concentrated *in vacuo* and purified by flash chromatography over silica gel, eluting with 5-15% EtOAc / hexanes, to give alkyne **10** (8.02 g, 42.6 mmol, 67%) as colorless oil:  $[\alpha]_D^{23} = +29.0$  ( $c = 1.02$ ,  $\text{CHCl}_3$ ); IR: (neat) 3287, 2967, 2931, 2857, 1455, 1399, 1303, 1119, 1097, 1007, 760  $\text{cm}^{-1}$ ;  $^1\text{H}$  NMR (700 MHz,  $\text{CDCl}_3$ )  $\delta$  7.52-7.54 (m, 2H), 7.35-7.40 (m, 3H), 5.54 (s, 1H), 4.69 (dt,  $J = 11.5, 2.4$  Hz, 1H), 4.30 (ddd,  $J = 11.7, 4.9, 1.3$  Hz, 1H), 3.99 (td,  $J = 12.1, 2.5$  Hz, 1H), 2.57 (d,  $J = 2.1$  Hz, 1H),

2.27-2.33 (m, 1H), 1.80-1.83 (m, 1H);  $^{13}\text{C}$  NMR (176 MHz,  $\text{CDCl}_3$ )  $\delta$  137.8, 129.1, 128.3, 126.2, 101.6, 81.6, 73.8, 67.2, 66.6, 31.9; HRMS (EI+) calcd. for  $\text{C}_{12}\text{H}_{12}\text{O}_2$  ( $\text{M}^+$ ) 188.08373, found 188.08406.

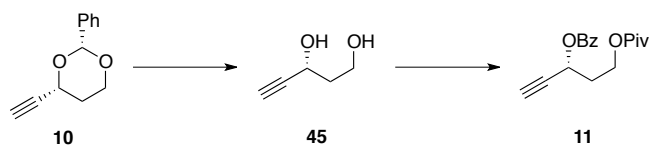

**Benzoate Ester 11:** To a stirred solution of benzylidene acetal **10** (5.34 g, 28.3 mmol) in MeOH (108.0 mL) at rt was added *p*-TSA $\cdot$ H $_2$ O (54.0 mg, 0.283 mmol). After 3 h, the reaction was quenched with Et $_3$ N (425 mg, 0.60 mL, 4.20 mmol) and the solvent was removed *in vacuo* to give the crude diol **45**.

To a stirred solution of the crude diol **45** in  $\text{CH}_2\text{Cl}_2$  / pyridine (81.0 mL, 2.5:1) at 0 °C was added pivaloyl chloride (3.76 g, 3.9 mL, 31.2 mmol). After 1.5 h, DMAP (343 mg, 2.83 mmol) followed by benzoyl chloride (4.98 g, 4.1 mL, 35.4 mmol) were added and the reaction was warmed to rt. After 2.5 h, the reaction was quenched with sat. aq. NaHCO $_3$  (75 mL) and the aqueous layer was extracted with Et $_2$ O (3 X 200 mL). The dried (MgSO $_4$ ) extract was concentrated *in vacuo* and purified by flash chromatography over silica gel, eluting with 5-10% EtOAc / hexanes, to give benzoate ester **11** (4.99 g, 17.3 mmol, 61%) as colorless oil:  $[\alpha]_{\text{D}}^{23} = +35.3$  ( $c = 1.02$ ,  $\text{CHCl}_3$ ); IR: (neat) 3291, 3264, 2972, 2933, 2898, 2871, 1727, 1481, 1450, 1271, 1155, 1092, 1065, 1026, 711  $\text{cm}^{-1}$ ;  $^1\text{H}$  NMR (400 MHz,  $\text{CDCl}_3$ )  $\delta$  8.06-8.09 (m, 2H), 7.59 (tt,  $J = 7.4, 1.2$  Hz, 1H), 7.44-7.48 (m, 2H), 5.74 (td,  $J = 6.7, 2.1$  Hz, 1H), 4.30 (td,  $J = 6.3, 2.0$  Hz, 2H), 2.55 (d,  $J = 2.1$  Hz, 1H), 2.23-2.38 (m, 2H), 1.21 (s, 9H);  $^{13}\text{C}$  NMR (100 MHz,  $\text{CDCl}_3$ )  $\delta$  178.3, 165.2, 133.3, 129.8, 129.5, 128.4, 80.3, 74.4, 61.3, 60.0, 38.7, 33.9, 27.1; HRMS (CI+) calcd. for  $\text{C}_{17}\text{H}_{21}\text{O}_4$  ( $\text{M}+\text{H}$ ) 289.1440, found 289.1434.

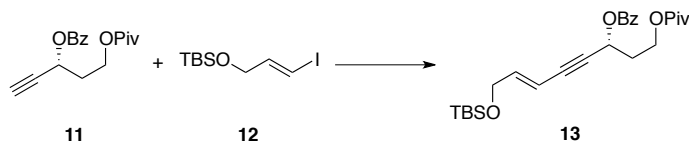

**Enyne 13:** To a stirred solution of PdCl $_2$ (PPh $_3$ ) $_2$  (995 mg, 1.41 mmol) in THF (163.0 mL) at rt was added CuI (810 mg, 4.25 mmol). A solution of alkyne **11** (8.17 g, 28.3 mmol) and vinyl iodide **12**<sup>3</sup> (9.30 g, 31.1 mmol) in THF (163.0 mL) was cannulated to it. Et $_3$ N (43.0 g, 60 mL, 424.9 mmol) was added dropwise over 15 min. After 2.5 h, the reaction was quenched with sat. aq. NH $_4$ Cl (150 mL) and the aqueous layer was extracted with Et $_2$ O (3 X 300 mL). The dried (MgSO $_4$ ) extract was concentrated *in vacuo* and purified by flash chromatography over silica gel, eluting with 10-15% EtOAc / hexanes, to give enyne **13** (10.11 g, 22.0 mmol, 78%) as colorless oil:  $[\alpha]_{\text{D}}^{23} = +6.3$  ( $c = 1.02$ ,  $\text{CHCl}_3$ ); IR: (neat) 2949, 2929, 2851, 1731, 1466, 1267, 1155, 1104, 952, 832, 711  $\text{cm}^{-1}$ ;  $^1\text{H}$  NMR (400 MHz,  $\text{CDCl}_3$ )  $\delta$  8.07-8.10 (m, 2H), 7.59 (tt,  $J = 7.4, 1.3$  Hz, 1H), 7.44-7.48 (m, 2H), 6.27 (dt,  $J = 15.7, 4.0$  Hz, 1H), 5.88 (dt,  $J = 1.5, 6.6$  Hz, 1H), 5.80 (ddt,  $J = 15.7, 2.1, 1.9$  Hz, 1H), 4.29 (t,  $J = 6.3$  Hz, 2H), 4.23 (dd,  $J = 4.0, 2.1$  Hz, 1H),

2.23-2.37 (m, 2H), 1.21 (s, 9H), 0.92 (s, 9H), 0.08 (s, 6H);  $^{13}\text{C}$  NMR (100 MHz,  $\text{CDCl}_3$ )  $\delta$  178.4, 165.3, 143.9, 133.2, 129.8, 129.7, 128.4, 107.5, 85.4, 84.4, 62.7, 62.2, 60.3, 38.7, 34.2, 27.1, 25.8, 18.3, -5.4; HRMS (ES+) calcd. for  $\text{C}_{26}\text{H}_{38}\text{O}_5\text{SiNa}$  ( $\text{M}+\text{Na}$ ) 481.2386, found 481.2398.

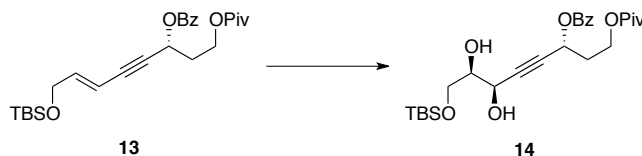

**Diol 14:** To a stirred solution of AD-mix- $\beta$  (30.53 g) in  $t\text{-BuOH} / \text{H}_2\text{O}$  (660.0 mL, 1:1) at rt was added  $\text{MeSO}_2\text{NH}_2$  (2.10 g, 22.0 mmol). After 15 min, the mixture was cooled down to 0 °C and transferred to a flask containing the enyne **13** (10.11 g, 22.0 mmol) at 0 °C. After 40 h, the reaction was quenched with solid  $\text{Na}_2\text{SO}_3$  (35.0 g, 277.5 mmol) and the aqueous layer was extracted with EtOAc (4 X 400 mL). The combined organic layer was washed with brine (250 mL). The dried ( $\text{MgSO}_4$ ) extract was concentrated *in vacuo* and purified by flash chromatography over silica gel, eluting with 10-40% EtOAc / hexanes, to give diol **14** (9.44 g, 19.2 mmol, 87%) as colorless oil:  $[\alpha]_{\text{D}}^{23} = +17.0$  ( $c = 1.00$ ,  $\text{CHCl}_3$ ); IR: (neat) 3460, 2954, 2927, 2856, 1723, 1478, 1265, 1146, 1097, 841, 786, 715  $\text{cm}^{-1}$ ;  $^1\text{H}$  NMR (400 MHz,  $\text{CDCl}_3$ )  $\delta$  8.06-8.08 (m, 2H), 7.61 (tt,  $J = 7.4, 1.1$  Hz, 1H), 7.47 (t,  $J = 7.8$  Hz, 2H), 5.78 (td,  $J = 6.7, 1.3$  Hz, 1H), 4.48 (td,  $J = 5.3, 1.4$  Hz, 1H), 4.24-4.38 (m, 2H), 3.71-3.85 (m, 3H), 2.81-2.83 (m, 1H), 2.71 (d,  $J = 6.0$  Hz, 1H), 2.23-2.38 (m, 1H), 1.22 (s, 9H), 0.90 (s, 9H), 0.09 (s, 3H), 0.08 (s, 3H);  $^{13}\text{C}$  NMR (100 MHz,  $\text{CDCl}_3$ )  $\delta$  178.4, 165.2, 133.3, 129.8, 129.5, 128.4, 84.3, 82.7, 73.9, 63.6, 63.4, 61.5, 60.1, 38.7, 34.0, 27.1, 25.8, 18.2, -5.50, -5.54; HRMS (ES+) calcd. for  $\text{C}_{26}\text{H}_{40}\text{O}_7\text{SiNa}$  ( $\text{M}+\text{Na}$ ) 515.2441, found 515.2419.

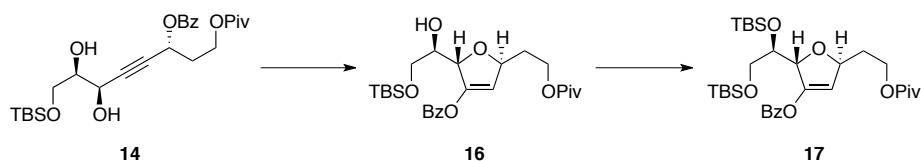

**Dihydrofuran 17:** To a stirred solution of diol **14** (5.30 g, 10.7 mmol) in dry  $\text{C}_6\text{H}_6$  (105.0 mL) was added  $\text{AgBF}_4$  (210 mg, 1.07 mmol) and heated to 80 °C in dark. After 1.45 h, the reaction was cooled down to rt and the solvent was reduced to 15 mL *in vacuo*. The residue was quickly passed through a plug of silica gel, eluting with 15-20% EtOAc / hexanes, to give the unstable dihydrofuran **16** (3.70 g, 7.51 mmol, 70%) as colorless oil.

To a stirred solution of alcohol **16** (3.70 mg, 7.51 mmol) in  $\text{CH}_2\text{Cl}_2$  (83.0 mL) at -78 °C were added 2,6-lutidine (3.21 g, 3.5 mL, 30.0 mmol) followed by TBSOTf (3.97 g, 3.5 mL, 15.0 mmol). After 3 h, the reaction was quenched with sat. aq.  $\text{NaHCO}_3$  (50 mL) and the aqueous layer was extracted with  $\text{Et}_2\text{O}$  (3 X 100 mL). The dried ( $\text{MgSO}_4$ ) extract was concentrated *in vacuo* and purified by flash chromatography over silica gel, eluting with 5-10% EtOAc / hexanes, to give bis TBS ether **17** (3.87 g, 6.38 mmol, 85%) as colorless oil:  $[\alpha]_{\text{D}}^{23} = +17.0$  ( $c =$

1.00, CHCl<sub>3</sub>); IR: (neat) 2956, 2925, 2886, 2855, 1750, 1731, 1466, 1260, 1155, 1088, 839, 777 cm<sup>-1</sup>; <sup>1</sup>H NMR (700 MHz, CDCl<sub>3</sub>) δ 8.08-8.09 (m, 2H), 7.63-7.66 (m, 1H), 7.50-7.52 (m, 2H), 6.11 (t, *J* = 1.5 Hz, 1H), 5.07-5.09 (m, 1H), 4.98 (dt, *J* = 5.7, 1.5 Hz, 1H), 4.20-4.27 (m, 2H), 3.85 (td, *J* = 6.6, 1.2 Hz, 1H), 3.78 (dd, *J* = 9.8, 7.5 Hz, 1H), 3.65 (dd, *J* = 9.7, 5.8 Hz, 1H), 1.97-2.04 (m, 2H), 1.22 (s, 9H), 0.94 (s, 9H), 0.84 (s, 9H), 0.114 (s, 3H), 0.112 (s, 3H), 0.05 (s, 3H), -0.03 (s, 3H); <sup>13</sup>C NMR (176 MHz, CDCl<sub>3</sub>) δ 178.6, 163.1, 144.9, 133.7, 129.9, 129.0, 128.6, 111.8, 81.8, 81.4, 72.9, 64.2, 61.1, 38.7, 35.5, 27.2, 26.0, 25.7, 18.4, 18.0, -4.1, -5.21, -5.24, -5.3; HRMS (ES<sup>+</sup>) calcd. for C<sub>32</sub>H<sub>55</sub>O<sub>7</sub>Si<sub>2</sub> (M+H) 607.3486, found 607.3475.

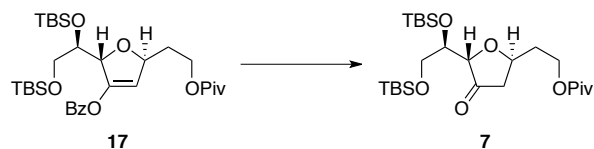

**Ketone 7:** To a stirred solution of enol benzoate **17** (4.93 g, 8.12 mmol) in Et<sub>2</sub>O (86.0 mL) at -78 °C was added MeLi·LiBr (7.4 mL, 16.2 mmol, 2.2 M in Et<sub>2</sub>O) dropwise. After 1.5 h, the reaction was quenched with sat. aq. NH<sub>4</sub>Cl (50 mL) and the aqueous layer was extracted with Et<sub>2</sub>O (3 X 100 mL). The dried (MgSO<sub>4</sub>) extract was concentrated *in vacuo* and purified by flash chromatography over silica gel, eluting with 5-10% EtOAc / hexanes, to give ketone **7** (3.30 g, 6.57 mmol, 81%) as colorless oil: [α]<sub>D</sub><sup>23</sup> = -56.3 (*c* = 1.03, CHCl<sub>3</sub>); IR: (neat) 2954, 2927, 2883, 2856, 1761, 1734, 1472, 1358, 1287, 1255, 1157, 1091, 835, 781 cm<sup>-1</sup>; <sup>1</sup>H NMR (400 MHz, CDCl<sub>3</sub>) δ 4.64-4.71 (m, 1H), 4.25 (t, *J* = 6.3 Hz, 2H), 4.15 (bs, 1H), 4.03 (ddd, *J* = 8.9, 5.3, 1.7 Hz, 1H), 3.74 (t, *J* = 9.2 Hz, 1H), 3.55 (dd, *J* = 9.6, 5.3 Hz, 1H), 2.56 (dd, *J* = 18.0, 6.3 Hz, 1H), 2.25 (ddd, *J* = 18.0, 9.0, 1.0 Hz, 1H), 1.99-2.06 (m, 2H), 1.22 (s, 9H), 0.90 (s, 9H), 0.85 (s, 9H), 0.086 (s, 3H), 0.084 (s, 3H), 0.07 (s, 3H), 0.02 (s, 3H); <sup>13</sup>C NMR (100 MHz, CDCl<sub>3</sub>) δ 216.8, 178.4, 80.1, 74.9, 74.7, 63.0, 61.0, 43.6, 38.7, 35.5, 27.2, 25.9, 25.7, 18.3, 17.8, -4.4, -5.2, -5.3, -5.4; HRMS (ES<sup>+</sup>) calcd. for C<sub>25</sub>H<sub>51</sub>O<sub>6</sub>Si<sub>2</sub> (M+H) 503.3224, found 503.3199.

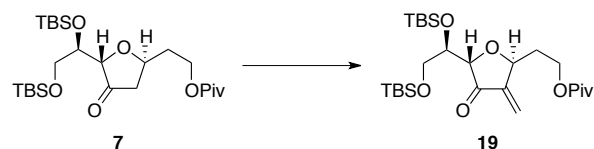

**Enone 19:** To a stirred solution of ketone **7** (1.91 g, 3.79 mmol) in THF (40.0 mL) at -78 °C was added LDA<sup>4</sup> (7.6 mL, 7.60 mmol, 1 M in THF / hexanes) and warmed to -50 °C over 15 min. After 35 min, DMPU (4.86 g, 4.6 mL, 37.9 mmol) was added followed by a solution of Eschenmoser's salt **18** (3.51 g, 18.9 mmol) in THF (40.0 mL). The reaction was slowly warmed to -10 °C over 50 min and quenched with sat. aq. NaHCO<sub>3</sub> (30 mL) and the aqueous layer was extracted with Et<sub>2</sub>O (3 X 100 mL). The dried (MgSO<sub>4</sub>) extract was concentrated *in vacuo* and purified by flash chromatography over silica gel, eluting with 4-10% EtOAc / hexanes, to give enone **19** (1.38 g, 2.68 mmol, 71%) as colorless oil:

$[\alpha]_D^{23} = -117.6$  ( $c = 1.00$ ,  $\text{CHCl}_3$ ); IR: (neat) 2953, 2929, 2883, 2855, 1731, 1645, 1474, 1256, 1158, 1112, 1084, 835, 781  $\text{cm}^{-1}$ ;  $^1\text{H}$  NMR (700 MHz,  $\text{CDCl}_3$ )  $\delta$  6.12 (d,  $J = 2.8$  Hz, 1H), 5.34 (d,  $J = 2.4$  Hz, 1H), 5.08 (ddd,  $J = 8.6, 5.9, 2.8$  Hz, 1H), 4.30-4.33 (m, 2H), 4.29 (d,  $J = 1.3$  Hz, 2H), 4.06 (ddd,  $J = 9.0, 5.3, 1.5$  Hz, 1H), 3.75 (dd,  $J = 9.4, 9.1$  Hz, 1H), 3.54 (dd,  $J = 9.5, 5.2$  Hz, 1H), 2.16-2.21 (m, 1H), 1.93-1.98 (m, 1H), 1.22 (s, 9H), 0.91 (s, 9H), 0.78 (s, 9H), 0.093 (s, 3H), 0.090 (s, 3H), 0.04 (s, 3H), -0.03 (s, 3H);  $^{13}\text{C}$  NMR (176 MHz,  $\text{CDCl}_3$ )  $\delta$  205.6, 178.5, 145.1, 116.8, 80.3, 74.9, 74.7, 63.0, 60.5, 38.7, 34.8, 27.2, 25.9, 25.6, 18.3, 17.8, -4.4, -5.3, -5.4, -5.5; HRMS (ES+) calcd. for  $\text{C}_{26}\text{H}_{50}\text{O}_6\text{Si}_2\text{Na}$  ( $\text{M}+\text{Na}$ ) 537.3044, found 537.3033.

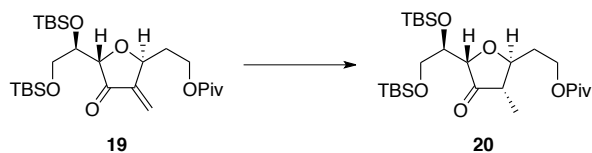

**Ketone 20:** To a stirred solution of enone **19** (1.28 g, 2.48 mmol) in toluene (45.0 mL) was added  $(\text{Ph}_3\text{P})_3\text{RhCl}$  (230 mg, 0.248 mmol) at rt and a hydrogen balloon was fitted to it. After 30 h, the reaction was directly loaded onto column and purified by flash chromatography over silica gel, eluting with 6-10% EtOAc / hexanes, to give ketone **20** (1.14 g, 2.20 mmol, 89%) as colorless oil:  $[\alpha]_D^{23} = -31.0$  ( $c = 1.00$ ,  $\text{CHCl}_3$ ); IR: (neat) 2959, 2932, 2878, 2856, 1761, 1728, 1462, 1287, 1255, 1151, 1118, 1069, 841, 775  $\text{cm}^{-1}$ ;  $^1\text{H}$  NMR (400 MHz,  $\text{CDCl}_3$ )  $\delta$  4.26-4.39 (m, 3H), 4.16 (ddd,  $J = 10.4, 8.6, 3.4$  Hz, 1H), 4.07 (ddd,  $J = 9.4, 5.1, 1.6$  Hz, 1H), 3.74 (t,  $J = 9.4$  Hz, 1H), 3.54 (dd,  $J = 9.4, 5.1$  Hz, 1H), 2.08-2.21 (m, 2H), 1.93-2.02 (m, 1H), 1.22 (s, 9H), 1.09 (d,  $J = 6.9$  Hz, 3H), 0.90 (s, 9H), 0.85 (s, 9H), 0.089 (s, 3H), 0.086 (s, 3H), 0.07 (s, 3H), 0.009 (s, 3H);  $^{13}\text{C}$  NMR (100 MHz,  $\text{CDCl}_3$ )  $\delta$  218.0, 178.4, 81.3, 80.0, 74.3, 62.8, 60.9, 48.1, 38.7, 34.2, 27.2, 25.9, 25.8, 18.3, 17.7, 9.6, -4.5, -4.8, -5.3, -5.4; HRMS (ES+) calcd. for  $\text{C}_{26}\text{H}_{53}\text{O}_6\text{Si}_2$  ( $\text{M}+\text{H}$ ) 517.3381, found 517.3359.

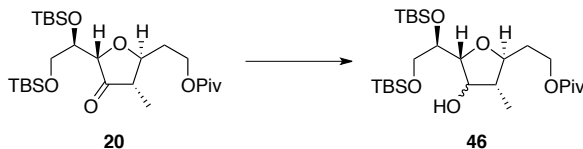

**Alcohol 46:** To a stirred solution of ketone **20** (1.10 g, 2.12 mmol) in MeOH (40.0 mL) at 40 °C was added  $\text{NaBH}_4$  (81.0 mg, 2.12 mmol). After 1 h, another portion of  $\text{NaBH}_4$  (40.5 g, 1.06 mmol) was added. After additional 30 min, the reaction was quenched with sat. aq.  $\text{NH}_4\text{Cl}$  (20 mL) and the aqueous layer was extracted with EtOAc (4 X 40 mL). The dried ( $\text{MgSO}_4$ ) extract was concentrated *in vacuo* and purified by flash chromatography over silica gel, eluting with 5-15% EtOAc / hexanes, to give diastereomeric alcohol **46** (1.01 g, 1.95 mmol, 92%) as colorless oil. Analytically pure samples of the individual diastereomers could be obtained via chromatography over silica gel, eluting with 5-15% EtOAc / hexanes, to give sequentially the major diastereomer followed by the minor diastereomer. **46** Major isomer:  $[\alpha]_D^{23} = -44.2$  ( $c = 1.03$ ,  $\text{CHCl}_3$ ); IR:

(neat) 3493, 2948, 2921, 2856, 1728, 1472, 1391, 1363, 1287, 1282, 1255, 1157, 1097, 841, 781  $\text{cm}^{-1}$ ;  $^1\text{H}$  NMR (400 MHz,  $\text{CDCl}_3$ )  $\delta$  4.31 (ddd,  $J = 10.8, 7.2, 4.8$  Hz, 1H), 4.17 (ddd,  $J = 10.8, 8.2, 6.4$  Hz, 1H), 4.12-4.14 (m, 1H), 3.98 (ddd,  $J = 8.2, 8.1, 3.8$  Hz, 1H), 3.88 (td,  $J = 9.7, 2.5$  Hz, 1H), 3.73 (dd,  $J = 8.0, 2.9$  Hz, 1H), 3.56-3.65 (m, 3H), 1.88-1.97 (m, 2H), 1.64-1.72 (m, 1H), 1.21 (s, 9H), 1.06 (d,  $J = 6.8$  Hz, 1H), 0.93 (s, 9H), 0.90 (s, 9H), 0.137 (s, 3H), 0.134 (s, 3H), 0.12 (s, 3H), 0.11 (s, 3H);  $^{13}\text{C}$  NMR (100 MHz,  $\text{CDCl}_3$ )  $\delta$  178.4, 86.9, 78.9, 74.5, 72.9, 65.9, 62.0, 44.9, 38.7, 33.6, 27.2, 25.8, 18.3, 9.7, -4.4, -4.9, -5.6; HRMS (ES+) calcd. for  $\text{C}_{26}\text{H}_{55}\text{O}_6\text{Si}_2\text{S}$  (M+H) 519.3537, found 519.3512.

**46** Minor Isomer:  $[\alpha]_{\text{D}}^{23} = -28.9$  ( $c = 1.05$ ,  $\text{CHCl}_3$ ); IR: (neat) 3504, 2954, 2921, 2883, 2856, 1734, 1712, 1456, 1282, 1255, 1167, 1075, 835, 781  $\text{cm}^{-1}$ ;  $^1\text{H}$  NMR (700 MHz,  $\text{CDCl}_3$ )  $\delta$  4.26 (ddd,  $J = 10.8, 7.0, 4.8$  Hz, 1H), 4.15 (ddd,  $J = 10.9, 8.4, 6.2$  Hz, 1H), 3.68-3.74 (m, 3H), 3.60-3.66 (m, 4H), 1.87-1.96 (m, 2H), 1.76-1.81 (m, 1H), 1.21 (s, 9H), 1.09 (d,  $J = 6.6$  Hz, 1H), 0.92 (s, 9H), 0.90 (s, 9H), 0.13 (s, 3H), 0.12 (s, 3H), 0.11 (s, 3H), 0.08 (s, 3H);  $^{13}\text{C}$  NMR (176 MHz,  $\text{CDCl}_3$ )  $\delta$  178.4, 85.4, 79.4, 78.6, 75.0, 65.8, 61.5, 46.1, 38.7, 33.6, 27.2, 25.87, 25.83, 18.29, 18.27, 13.9, -4.5, -4.7, -5.3, -5.4; HRMS (ES+) calcd. for  $\text{C}_{26}\text{H}_{55}\text{O}_6\text{Si}_2\text{S}$  (M+H) 519.3537, found 519.3511.

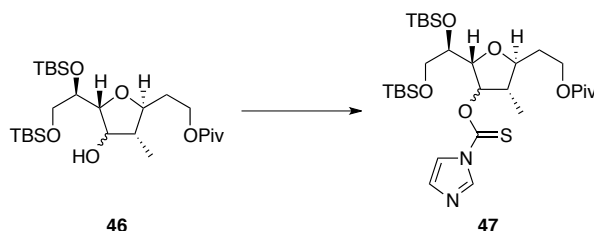

**Thioate 47:** To a stirred solution of diastereomeric alcohol **46** (1.01 g, 1.95 mmol) in toluene (24.0 mL) was added thiocarbonyldiimidazole (497 mg, 2.78 mmol) at rt and heated to 100  $^{\circ}\text{C}$ . After 24 h, the reaction cooled down to rt and the solvent was removed *in vacuo*. The residue was directly loaded onto column and purified by flash chromatography over silica gel, eluting with 10-20% EtOAc / hexanes, to give diastereomeric thioate **47** (1.12 g, 1.78 mmol, 91%) as colorless oil. Analytically pure samples of the individual diastereomers could be obtained via chromatography over silica gel, eluting with 5-15% EtOAc / hexanes, to give sequentially the major diastereomer followed by the minor diastereomer. **47** Major Isomer:  $[\alpha]_{\text{D}}^{23} = -18.5$  ( $c = 1.00$ ,  $\text{CHCl}_3$ ); IR: (neat) 2954, 2927, 2883, 2856, 1761, 1734, 1472, 1358, 1287, 1255, 1157, 1091, 835, 781  $\text{cm}^{-1}$ ;  $^1\text{H}$  NMR (400 MHz,  $\text{CDCl}_3$ )  $\delta$  8.33 (s, 1H), 7.60 (s, 1H), 7.09 (s, 1H), 6.31 (dd,  $J = 3.4, 3.3$  Hz, 1H), 4.29-4.35 (m, 1H), 4.19-4.25 (m, 2H), 3.79-3.88 (m, 2H), 3.59 (dd,  $J = 10.7, 2.4$  Hz, 1H), 3.48 (dd,  $J = 10.7, 4.5$  Hz, 1H), 2.29-2.38 (m, 1H), 1.93-2.01 (m, 1H), 1.74-1.83 (m, 1H), 1.22 (s, 9H), 1.01 (d,  $J = 6.8$  Hz, 3H), 0.90 (s, 9H), 0.84 (s, 9H), 0.11 (s, 3H), 0.07 (s, 3H), -0.01 (s, 3H), -0.02 (s, 3H);  $^{13}\text{C}$  NMR (100 MHz,  $\text{CDCl}_3$ )  $\delta$  183.4, 178.3, 136.7, 131.2, 117.6, 85.8, 82.2, 79.9, 73.3, 65.9, 61.4, 45.5, 38.7, 33.3, 27.2, 25.9, 25.8, 18.4, 18.3, 10.5, -4.4, -4.6, -5.4; HRMS (ES+) calcd. for  $\text{C}_{30}\text{H}_{57}\text{O}_6\text{N}_2\text{Si}_2\text{S}$  (M+H) 629.3476, found 629.3481.

**47** Minor Isomer:  $[\alpha]_D^{23} = -25.7$  ( $c = 1.05$ ,  $\text{CHCl}_3$ ); IR: (neat) 2954, 2927, 2879, 2856, 1724, 1472, 1461, 1394, 1331, 1280, 1241, 1225, 1150, 1095, 989, 836,  $777\text{ cm}^{-1}$ ;  $^1\text{H NMR}$  (400 MHz,  $\text{CDCl}_3$ )  $\delta$  8.34 (s, 1H), 7.63 (s, 1H), 7.06 (t,  $J = 0.8$  Hz, 1H), 5.96 (dd,  $J = 5.5, 3.9$  Hz, 1H), 4.30 (dd,  $J = 11.3, 5.7$  Hz, 1H), 4.26 (t,  $J = 3.3$  Hz, 1H), 4.14-4.20 (m, 1H), 3.99-4.03 (m, 1H), 3.91 (td,  $J = 8.6, 3.3$  Hz, 1H), 3.70 (dd,  $J = 9.7, 7.7$  Hz, 1H), 3.61 (dd,  $J = 9.8, 5.0$  Hz, 1H), 2.21-2.30 (m, 1H), 1.92-2.00 (m, 1H), 1.81-1.90 (m, 1H), 1.21 (d,  $J = 6.7$  Hz, 3H), 1.21 (s, 9H), 0.91 (s, 9H), 0.87 (s, 9H), 0.17 (s, 3H), 0.13 (s, 3H), 0.06 (s, 3H), 0.05 (s, 3H);  $^{13}\text{C NMR}$  (100 MHz,  $\text{CDCl}_3$ )  $\delta$  183.9, 178.4, 136.9, 130.9, 117.9, 90.7, 82.1, 81.9, 74.5, 63.9, 61.4, 46.7, 38.7, 33.2, 27.2, 25.9, 18.3, 18.0, 14.4, -4.1, -4.3, -5.33, -5.34; HRMS (ES+) calcd. for  $\text{C}_{30}\text{H}_{57}\text{O}_6\text{N}_2\text{Si}_2\text{S}$  (M+H) 629.3476, found 629.3475.

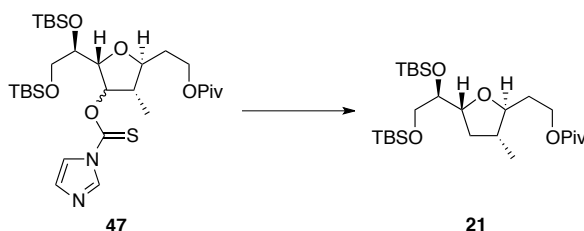

**Tetrahydrofuran 21:** To a stirred solution of diastereomeric thioate **47** (1.12 g, 1.78 mmol) in deoxygenated toluene (96.0 mL) at rt was added AIBN (29.3 mg, 0.178 mmol) and heated to 95 °C.  $\text{Bu}_3\text{SnH}$  (1.04 g, 0.96 mL, 3.56 mmol) was added dropwise over 45 min. After another 45 min, the reaction was cooled down to rt and the solvent was removed *in vacuo*. The residue was directly loaded onto the column and purified by flash chromatography over silica gel, eluting with 3-6% EtOAc / hexanes, to give tetrahydrofuran **21** (859 mg, 1.71 mmol, 96%) as colorless oil:  $[\alpha]_D^{23} = -35.0$  ( $c = 1.03$ ,  $\text{CHCl}_3$ ); IR: (neat) 2958, 2926, 2886, 2854, 1733, 1473, 1457, 1361, 1282, 1250, 1154, 1106, 1074, 938, 835,  $775\text{ cm}^{-1}$ ;  $^1\text{H NMR}$  (400 MHz,  $\text{CDCl}_3$ )  $\delta$  4.26 (ddd,  $J = 10.8, 7.1, 5.1$  Hz, 1H), 4.14 (ddd,  $J = 10.8, 7.7, 6.6$  Hz, 1H), 4.00-4.05 (m, 1H), 3.63-3.68 (m, 1H), 3.53-3.59 (m, 2H), 3.44 (td,  $J = 8.9, 2.9$  Hz, 1H), 2.04 (dt,  $J = 12.0, 6.6$  Hz, 1H), 1.80-1.94 (m, 2H), 1.64-1.73 (m, 1H), 1.52 (td,  $J = 11.6, 9.7$  Hz, 1H), 1.20 (s, 9H), 1.01 (d,  $J = 6.5$  Hz, 3H), 0.908 (s, 9H), 0.904 (s, 9H), 0.09 (s, 3H), 0.08 (s, 3H), 0.068 (s, 3H), 0.063 (s, 3H);  $^{13}\text{C NMR}$  (100 MHz,  $\text{CDCl}_3$ )  $\delta$  178.4, 81.6, 78.5, 75.7, 65.1, 62.1, 40.1, 38.6, 36.7, 33.1, 27.2, 25.9, 18.4, 18.2, 15.9, -4.3, -4.6, -5.3; HRMS (ES+) calcd. for  $\text{C}_{26}\text{H}_{55}\text{O}_5\text{Si}_2$  (M+H) 503.3588, found 503.3586.

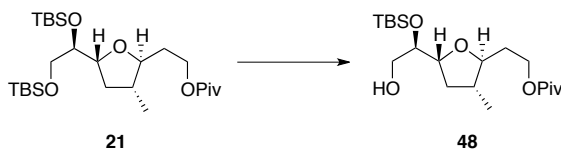

**Alcohol 48:** To a stirred solution of bis-TBS ether **21** (501 mg, 0.997 mmol) in THF (10.0 mL) at 0 °C was added a stock solution of  $\text{HF}\cdot\text{pyr}^5$  (5.5 mL) over 1 h. After 24 h, the reaction quenched with sat. aq.  $\text{NaHCO}_3$  (30 mL) and the aqueous layer was extracted with EtOAc /  $\text{Et}_2\text{O}$  (2:1, 3 X 60 mL). The dried ( $\text{MgSO}_4$ ) extract was concentrated *in vacuo* and purified by flash chromatography



over silica gel, eluting with 10-30% EtOAc / hexanes, to give alcohol **48** (322 mg, 0.828 mmol, 83%) as colorless oil:  $[\alpha]_D^{23} = -31.3$  ( $c = 1.04$ ,  $\text{CHCl}_3$ ); IR: (neat) 3494, 2957, 2930, 2882, 2855, 1730, 1477, 1461, 1284, 1252, 1153, 1102, 1055, 940, 838, 778  $\text{cm}^{-1}$ ;  $^1\text{H}$  NMR (700 MHz,  $\text{CDCl}_3$ )  $\delta$  4.27 (ddd,  $J = 10.9, 7.1, 4.9$  Hz, 1H), 4.14 (ddd,  $J = 10.9, 8.2, 6.3$  Hz, 1H), 4.06 (dt,  $J = 9.7, 6.0$  Hz, 1H), 3.65-3.69 (m, 2H), 3.53-3.57 (m, 1H), 3.48 (td,  $J = 6.3, 2.8$  Hz, 1H), 2.37-2.39 (m, 1H), 2.09 (dt,  $J = 12.1, 6.5$  Hz, 1H), 1.91-1.96 (m, 1H), 1.86-1.91 (m, 1H), 1.68-1.72 (m, 1H), 1.43 (td,  $J = 11.5, 10.1$  Hz, 1H), 1.21 (s, 9H), 1.04 (d,  $J = 6.5$  Hz, 3H), 0.92 (s, 9H), 0.13 (s, 3H), 0.12 (s, 3H);  $^{13}\text{C}$  NMR (100 MHz,  $\text{CDCl}_3$ )  $\delta$  178.4, 81.8, 79.8, 74.7, 64.2, 61.8, 39.9, 38.6, 36.8, 33.0, 27.1, 25.9, 18.2, 15.9, -4.4, -4.8; HRMS (ES+) calcd. for  $\text{C}_{20}\text{H}_{40}\text{O}_5\text{Si}_2\text{Na}$  (M+Na) 411.2543, found 411.2542.

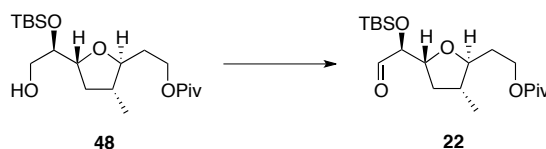

**Aldehyde 22:** To a stirred solution of alcohol **48** (322 mg, 0.828 mmol) in  $\text{CH}_2\text{Cl}_2$  (11.0 mL) at 0 °C was added pyridine (786 mg, 0.81 mL, 9.94 mmol) followed by Dess-Martin periodinane (1.40 g, 3.31 mmol) in one portion. After 30 min, the reaction was warmed to rt. After another 3 h, the reaction was quenched with sat. aq.  $\text{NaHCO}_3$  (25 mL) and the aqueous layer was extracted with  $\text{CH}_2\text{Cl}_2$  (3 X 50 mL). The dried ( $\text{MgSO}_4$ ) extract was concentrated *in vacuo* and purified by flash chromatography over silica gel, eluting with 10-15% EtOAc / hexanes, to give aldehyde **22** (279 mg, 0.721 mmol, 87%) as colorless oil:  $[\alpha]_D^{23} = -72.6$  ( $c = 1.04$ ,  $\text{CHCl}_3$ ); IR: (neat) 2953, 2925, 2859, 1731, 1478, 1454, 1283, 1252, 1155, 1112, 940, 839, 777  $\text{cm}^{-1}$ ;  $^1\text{H}$  NMR (400 MHz,  $\text{CDCl}_3$ )  $\delta$  9.69 (d,  $J = 1.4$  Hz, 1H), 4.29 (ddd,  $J = 9.2, 6.6, 4.0$  Hz, 1H), 4.23 (ddd,  $J = 10.9, 7.1, 5.2$  Hz, 1H), 4.13 (ddd,  $J = 10.9, 7.8, 6.5$  Hz, 1H), 3.95 (dd,  $J = 4.0, 1.4$  Hz, 1H), 3.53 (td,  $J = 9.0, 3.0$  Hz, 1H), 2.13 (dt,  $J = 12.1, 6.8$  Hz, 1H), 1.83-1.96 (m, 2H), 1.59-1.73 (m, 2H), 1.20 (s, 9H), 1.04 (d,  $J = 6.5$  Hz, 3H), 0.95 (s, 9H), 0.11 (s, 3H), 0.10 (s, 3H);  $^{13}\text{C}$  NMR (176 MHz,  $\text{CDCl}_3$ )  $\delta$  203.8, 178.5, 82.6, 80.0, 78.5, 61.8, 39.7, 38.7, 36.1, 32.8, 27.2, 25.8, 18.3, 15.7, -4.6, -4.9; HRMS (CI+) calcd. for  $\text{C}_{20}\text{H}_{39}\text{O}_5\text{Si}$  (M+H) 387.2567, found 387.2560.

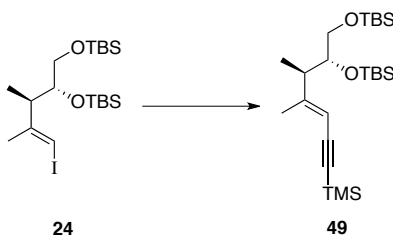

**TMS Enyne 49:** To a stirred solution of  $\text{PdCl}_2(\text{PPh}_3)_2$  (71.0 mg, 0.101 mmol) in THF (13.0 mL) at rt was added  $\text{CuI}$  (57.8 mg, 0.303 mmol) followed by a solution of TMS acetylene (993 mg, 1.45 mL, 10.1 mmol) and vinyl iodide **24**<sup>6</sup> (980 mg, 2.02 mmol) in THF (13.0 mL).  $\text{Et}_3\text{N}$  (3.07 g, 4.2 mL, 30.3 mmol) was added dropwise over 15 min. After 1 h, the reaction was quenched with sat. aq.

NH<sub>4</sub>Cl (30 mL) and the aqueous layer was extracted with Et<sub>2</sub>O (3 X 50 mL). The dried (MgSO<sub>4</sub>) extract was concentrated *in vacuo* and purified by flash chromatography over silica gel, eluting with 0-2% EtOAc / hexanes, to give TMS enyne **49** (718 mg, 1.57 mmol, 78%) as colorless oil: [α]<sub>D</sub><sup>23</sup> = +27.5 (*c* = 1.04, CHCl<sub>3</sub>); IR: (neat) 2956, 2925, 2898, 2851, 2135, 1478, 1260, 1088, 832, 777 cm<sup>-1</sup>; <sup>1</sup>H NMR (700 MHz, CDCl<sub>3</sub>) δ 5.40 (br s, 1H), 3.64 (ddd, *J* = 6.7, 5.2, 4.2 Hz, 1H), 3.46 (dd, *J* = 10.0, 5.2 Hz, 1H), 3.42 (dd, *J* = 10.0, 6.8 Hz, 1H), 2.50 (qd, *J* = 7.0, 4.2 Hz, 1H), 1.94 (d, *J* = 1.1 Hz, 3H), 1.07 (d, *J* = 7.1 Hz, 3H), 0.91 (s, 9H), 0.90 (s, 9H), 0.21 (s, 9H), 0.08 (s, 3H), 0.07 (s, 3H), 0.06 (s, 3H), 0.05 (s, 3H); <sup>13</sup>C NMR (176 MHz, CDCl<sub>3</sub>) δ 155.4, 106.7, 103.8, 96.7, 76.3, 65.2, 44.0, 26.0, 25.9, 18.3, 18.2, 18.1, 15.8, 0.19, -4.1, -4.9, -5.3, -5.4.

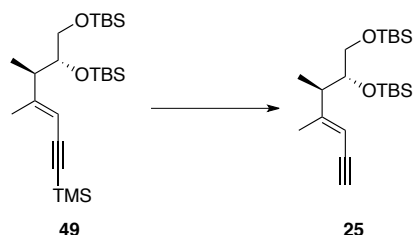

**Enyne 25:** To a stirred solution of TMS enyne **49** (718 mg, 1.57 mmol) in MeOH (8.0 mL) at rt was added finely powdered K<sub>2</sub>CO<sub>3</sub> (165 mg, 1.19 mmol). After 2 h, the solvent was removed *in vacuo* and the residue was dissolved in Et<sub>2</sub>O / H<sub>2</sub>O (3:1, 100 mL). The aqueous layer was extracted with Et<sub>2</sub>O (3 X 50 mL). The dried (MgSO<sub>4</sub>) extract was concentrated *in vacuo* and purified by flash chromatography over silica gel, eluting with 0-2% EtOAc / hexanes, to give enyne **25** (574 mg, 1.49 mmol, 95%) as colorless oil: [α]<sub>D</sub><sup>23</sup> = +11.4 (*c* = 1.01, CHCl<sub>3</sub>); IR: (neat) 3312, 2952, 2925, 2885, 2857, 1474, 1466, 1387, 1356, 1253, 1119, 1099, 1063, 1012, 834, 810, 779 cm<sup>-1</sup>; <sup>1</sup>H NMR (400 MHz, CDCl<sub>3</sub>) δ 5.37 (bs, 1H), 3.64 (dt, *J* = 6.5, 4.5 Hz, 1H), 3.48 (dd, *J* = 10.0, 5.1 Hz, 1H), 3.41 (dd, *J* = 10.0, 6.8 Hz, 1H), 3.05 (d, *J* = 2.0 Hz, 1H), 2.50-2.56 (m, 1H), 1.94 (d, *J* = 0.6 Hz, 3H), 1.08 (d, *J* = 7.1 Hz, 3H), 0.91 (s, 9H), 0.90 (s, 9H), 0.077 (s, 3H), 0.070 (s, 3H), 0.059 (s, 3H), 0.056 (s, 3H); <sup>13</sup>C NMR (100 MHz, CDCl<sub>3</sub>) δ 155.7, 105.5, 82.0, 79.7, 76.2, 65.2, 43.9, 25.9, 25.8, 18.2, 18.0, 15.8, -4.2, -4.9, -5.3, -5.4; HRMS (ES<sup>+</sup>) calcd. for C<sub>21</sub>H<sub>43</sub>O<sub>2</sub>Si<sub>2</sub> (M+H) 383.2802, found 383.2819.

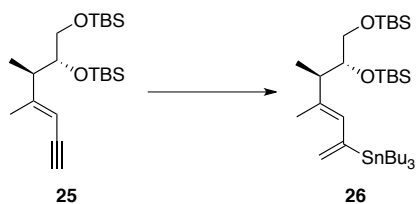

**Dienyl Stannane 26:** To a stirred solution of enyne **25** (697 mg, 1.82 mmol) in degassed THF (88.0 mL) at 0 °C was added PdCl<sub>2</sub>(PPh<sub>3</sub>)<sub>2</sub> (63.9 mg, 0.091 mmol) followed by Bu<sub>3</sub>SnH (1.06 g, 0.98 mL, 3.64 mmol) over 2 min. After 20 min, the reaction was passed through a plug of silica gel eluting with hexanes (200 mL) buffered with 1% Et<sub>3</sub>N. The solvent was removed *in vacuo* and the

residue was purified by flash chromatography over silica gel, eluting with pentane buffered with 1% Et<sub>3</sub>N, to give dienyl stannane **26** (884 mg, 1.31 mmol, 72%) as colorless oil:  $[\alpha]_D^{23} = +11.8$  ( $c = 1.00$ , CHCl<sub>3</sub>); IR: (neat) 2954, 2923, 2885, 2855, 1472, 1466, 1365, 1254, 1119, 1095, 1063, 1003, 956, 833, 777 cm<sup>-1</sup>; <sup>1</sup>H NMR (400 MHz, CDCl<sub>3</sub>)  $\delta$  5.95 (s, 1H), 5.65 (dd,  $J = 3.5, 1.8$  Hz, 1H), 5.32 (dd,  $J = 3.5, 1.2$  Hz, 1H), 3.69 (td,  $J = 5.8, 3.8$  Hz, 1H), 3.53 (dd,  $J = 10.0, 5.8$  Hz, 1H), 3.47 (dd,  $J = 10.0, 5.8$  Hz, 1H), 2.42 (qd,  $J = 7.2, 3.8$  Hz, 1H), 1.71 (d,  $J = 1.1$  Hz, 3H), 1.46-1.56 (m, 6H), 1.29-1.38 (m, 6H), 1.09 (d,  $J = 7.2$  Hz, 3H), 0.90-0.95 (m, 33H), 0.098 (s, 3H), 0.094 (s, 3H), 0.06 (s, 6H); <sup>13</sup>C NMR (100 MHz, CDCl<sub>3</sub>)  $\delta$  151.9, 135.2, 131.8, 126.6, 76.8, 65.6, 45.0, 29.0, 27.3, 26.0, 25.9, 18.3, 18.1, 16.0, 15.9, 13.6, 9.9, -4.1, -4.8, -5.3; HRMS (ES+) calcd. for C<sub>33</sub>H<sub>70</sub>O<sub>2</sub>Si<sub>2</sub>SnNa (M+Na) 697.3834, found 697.3802.

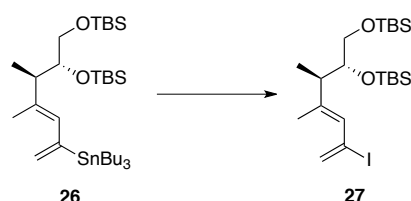

**Dienyl iodide 27:** To a stirred solution of dienyl stannane **26** (884 mg, 1.31 mmol) in CH<sub>2</sub>Cl<sub>2</sub> (100.0 mL) at 0 °C was cannulated a solution of I<sub>2</sub> (665 mg, 2.62 mmol) in CH<sub>2</sub>Cl<sub>2</sub> (50.0 mL). After 15 min, the reaction was quenched with 10% aq. Na<sub>2</sub>S<sub>2</sub>O<sub>3</sub> (50 mL) and the aqueous layer was extracted with CH<sub>2</sub>Cl<sub>2</sub> (3 X 50 mL). The dried (MgSO<sub>4</sub>) extract was concentrated *in vacuo* and purified by flash chromatography over silica gel, eluting with pentane with 1% Et<sub>3</sub>N, to give dienyl iodide **27** (469 mg, 0.918 mmol, 70%) as colorless oil:  $[\alpha]_D^{23} = +7.5$  ( $c = 1.01$ , CHCl<sub>3</sub>); IR: (neat) 2954, 2927, 2883, 2855, 1603, 1472, 1254, 1123, 1095, 1063, 833, 773 cm<sup>-1</sup>; <sup>1</sup>H NMR (400 MHz, CDCl<sub>3</sub>)  $\delta$  5.98 (s, 1H), 5.93 (s, 1H), 5.92 (t,  $J = 1.3$  Hz, 1H), 3.68 (td,  $J = 5.8, 4.3$  Hz, 1H), 3.42-3.49 (m, 2H), 2.43 (qd,  $J = 7.1, 4.3$  Hz, 1H), 1.81 (d,  $J = 1.3$  Hz, 3H), 1.08 (d,  $J = 7.1$  Hz, 3H), 0.91 (s, 9H), 0.90 (s, 9H), 0.08 (s, 3H), 0.079 (s, 3H), 0.071 (s, 3H), 0.06 (s, 3H); <sup>13</sup>C NMR (100 MHz, CDCl<sub>3</sub>)  $\delta$  142.2, 131.1, 127.4, 104.0, 76.5, 65.2, 44.1, 26.0, 25.9, 18.3, 18.1, 16.2, 15.7, -4.1, -4.8, -5.2, -5.3; HRMS (ES+) calcd. for C<sub>21</sub>H<sub>44</sub>I<sub>2</sub>Si<sub>2</sub> (M+H) 511.1925, found 511.1914.

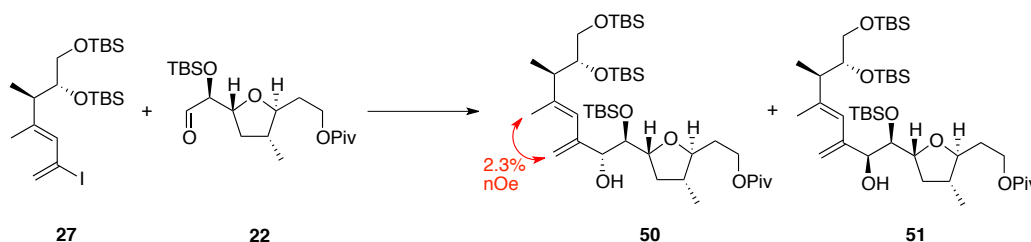

**Alcohols 50 and 51:** To a stirred solution of dienyl iodide **27** (442 mg, 0.865 mmol) in THF (7.5 mL) at -78 °C was added n-BuLi (0.90 mL, 1.44 mmol, 2.5 M in hexane). After 45 min, a solution of aldehyde **22** (279 mg, 0.721 mmol) in THF (7.5 mL, pre-cooled to -78 °C) was cannulated to it. After 1 h, the reaction

was quenched with sat. aq.  $\text{NH}_4\text{Cl}$  (25 mL) and the aqueous layer was extracted with  $\text{Et}_2\text{O}$  (3 X 50 mL). The dried ( $\text{MgSO}_4$ ) extract was concentrated *in vacuo* and purified by flash chromatography over silica gel, eluting with 4-10%  $\text{EtOAc}$  / hexanes, to give the diastereomeric alcohols **50** and **51** (345 mg, 0.447 mmol, 62%) as colorless oils. Analytically pure samples of the individual diastereomers could be obtained via chromatography over silica gel, eluting with 4-10%  $\text{EtOAc}$  / hexanes, to give sequentially the major diastereomer **50** followed by the minor diastereomer **51**. Major Isomer (**50**):  $[\alpha]_D^{23} = +28.3$  ( $c = 1.03$ ,  $\text{CHCl}_3$ ); IR: (neat) 3478, 2956, 2925, 2883, 2859, 1727, 1474, 1462, 1287, 1158, 1092, 835, 773  $\text{cm}^{-1}$ ;  $^1\text{H}$  NMR (700 MHz,  $\text{CDCl}_3$ )  $\delta$  5.66 (s, 1H), 5.52 (s, 1H), 5.04 (s, 1H), 4.25-4.29 (m, 1H), 4.22 (bd,  $J = 5.88$  Hz, 1H), 4.13-4.17 (m, 2H), 4.09 (d,  $J = 7.0$  Hz, 1H), 3.67 (td,  $J = 6.0, 4.0$  Hz, 1H), 3.61 (t,  $J = 2.8$  Hz, 1H), 3.58 (td,  $J = 9.1, 2.8$  Hz, 1H), 3.45-3.49 (m, 2H), 2.49 (qd,  $J = 7.1, 4.0$  Hz, 1H), 1.98 (dt,  $J = 11.8, 6.8$  Hz, 1H), 1.90-1.95 (m, 1H), 1.78 (s, 3H), 1.66-1.72 (m, 1H), 1.64 (td,  $J = 11.4, 9.5$  Hz, 1H), 1.22 (s, 9H), 1.08 (d,  $J = 7.1$  Hz, 3H), 1.02 (d,  $J = 6.4$  Hz, 3H), 0.95 (s, 9H), 0.914 (s, 9H), 0.910 (s, 9H), 0.14 (s, 3H), 0.11 (s, 3H), 0.09 (s, 3H), 0.08 (s, 3H), 0.05 (s, 3H), 0.04 (s, 3H);  $^{13}\text{C}$  NMR (176 MHz,  $\text{CDCl}_3$ )  $\delta$  178.5, 145.4, 141.5, 124.8, 113.8, 82.7, 78.1, 78.0, 76.6, 74.1, 65.4, 61.8, 45.3, 39.4, 38.7, 37.0, 32.8, 27.2, 26.0, 25.98, 25.94, 18.3, 18.2, 18.1, 16.3, 16.1, 15.6, -4.1, -4.3, 4.5, -4.8, -5.31, -5.37; HRMS (ES+) calcd. for  $\text{C}_{41}\text{H}_{82}\text{O}_7\text{Si}_3\text{Na}$  (M+Na) 793.5266, found 793.5294.

Minor isomer (**51**):  $^1\text{H}$  NMR (400 MHz,  $\text{CDCl}_3$ )  $\delta$  5.65 (s, 1H), 5.34 (t,  $J = 1.6$  Hz, 1H), 5.02 (s, 1H), 4.27(ddd,  $J = 10.8, 7.2, 4.9$  Hz, 1H), 4.13 (ddd,  $J = 10.8, 8.0, 6.5$  Hz, 1H), 4.04 (ddd,  $J = 9.8, 7.3, 6.0$  Hz, 1H), 3.91 (d,  $J = 9.3$  Hz, 1H), 3.69 (td,  $J = 5.7, 4.1$  Hz, 1H), 3.57 (dd,  $J = 7.4, 1.3$  Hz, 1H), 3.44-3.53 (m, 3H), 2.91 (d,  $J = 9.3$  Hz, 1H), 2.46 (qd,  $J = 7.1, 4.0$  Hz, 1H), 2.15 (dt,  $J = 11.9, 6.2$  Hz, 1H), 1.87-1.96 (m, 2H), 1.82 (d,  $J = 1.2$  Hz, 3H), 1.66-1.75 (m, 1H), 1.27-1.37 (m, 1H), 1.21 (s, 9H), 1.10 (d,  $J = 7.1$  Hz, 3H), 1.03 (d,  $J = 6.4$  Hz, 3H), 0.90 (s, 18H), 0.89 (s, 9H), 0.12 (s, 3H), 0.08 (s, 6H), 0.05 (s, 6H), 0.03 (s, 3H);  $^{13}\text{C}$  NMR (100 MHz,  $\text{CDCl}_3$ )  $\delta$  178.3, 145.8, 142.2, 123.7, 112.9, 81.6, 80.2, 76.0, 73.2, 65.5, 61.8, 45.3, 39.9, 38.6, 37.9, 33.2, 27.2, 26.06, 26.01, 25.9, 18.4, 18.3, 18.1, 17.6, 16.1, 16.0, -3.9, -4.1, -4.7, -4.8, -5.2, -5.3.

### Mosher ester determination of stereochemistry in compound **50**<sup>7</sup>

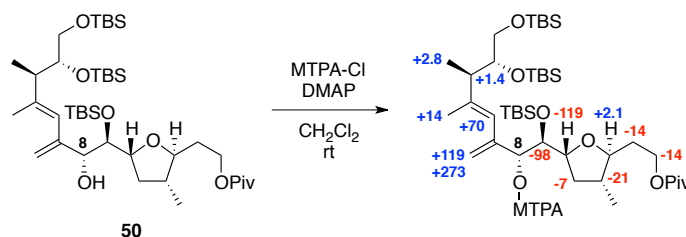

$^1\text{H}$  NMR shift differences [(S)-MTPA-(R)-MTPA] reported in Hertz ( $\text{CDCl}_3$ , 700 MHz)

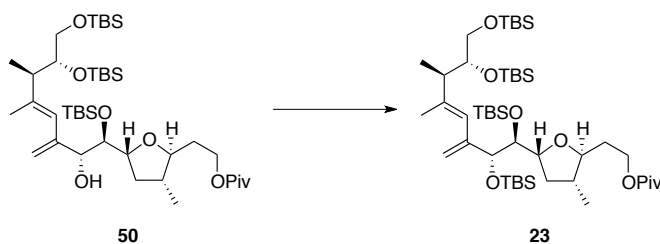

**TBS Ether 23:** To a stirred solution of alcohol **50** (195 mg, 0.252 mmol) in  $\text{CH}_2\text{Cl}_2$  (6.5 mL) at  $-78\text{ }^\circ\text{C}$  were added 2,6-lutidine (103 mg, 118  $\mu\text{L}$ , 1.01 mmol) followed by TBSOTf (133 mg, 117  $\mu\text{L}$ , 0.505 mmol). After 3 h, the reaction was quenched with sat. aq.  $\text{NaHCO}_3$  (15 mL) and the aqueous layer was extracted with  $\text{Et}_2\text{O}$  (3 X 40 mL). The dried ( $\text{MgSO}_4$ ) extract was concentrated *in vacuo* and purified by flash chromatography over silica gel, eluting with 2-5%  $\text{EtOAc}$  / hexanes, to give the TBS ether **23** (195 mg, 0.220 mmol, 87%) as colorless oil:  $[\alpha]_D^{23} = +34.6$  ( $c = 1.04$ ,  $\text{CHCl}_3$ ); IR: (neat) 2956, 2925, 2883, 2859, 1731, 1470, 1462, 1256, 1158, 1100, 1081, 832, 773  $\text{cm}^{-1}$ ;  $^1\text{H}$  NMR (700 MHz,  $\text{CDCl}_3$ )  $\delta$  5.66 (s, 1H), 5.33 (t,  $J = 2.0$  Hz, 1H), 4.96 (s, 1H), 4.27 (ddd,  $J = 10.8, 7.2, 4.8$  Hz, 1H), 4.11-4.15 (m, 2H), 3.97 (ddd,  $J = 9.8, 7.2, 6.2$  Hz, 1H), 3.65-3.67 (m, 1H), 3.54 (dd,  $J = 7.3, 2.3$  Hz, 1H), 3.43-3.47 (m, 2H), 3.31 (td,  $J = 9.2, 2.6$  Hz, 1H), 2.51 (qd,  $J = 7.1, 4.0$  Hz, 1H), 2.07 (dt,  $J = 12.3, 6.4$  Hz, 1H), 1.87-1.92 (m, 1H), 1.76-1.83 (m, 1H), 1.79 (d,  $J = 1.2$  Hz, 3H), 1.64-1.69 (m, 1H), 1.21-1.27 (m, 1H), 1.20 (s, 9H), 1.09 (d,  $J = 7.2$  Hz, 3H), 0.97 (d,  $J = 6.4$  Hz, 3H), 0.92 (s, 9H), 0.917 (s, 9H), 0.915 (s, 9H), 0.90 (s, 9H), 0.10 (s, 3H), 0.09 (s, 3H), 0.085 (s, 3H), 0.081 (s, 3H), 0.05 (s, 3H), 0.04 (s, 6H), 0.02 (s, 3H), 0.03 (s, 3H);  $^{13}\text{C}$  NMR (176 MHz,  $\text{CDCl}_3$ )  $\delta$  178.4, 145.2, 140.9, 125.7, 114.3, 80.2, 79.5, 79.0, 78.5, 65.4, 62.1, 45.6, 40.3, 38.7, 37.9, 33.0, 27.2, 26.1, 26.0, 25.9, 18.43, 18.40, 18.3, 18.1, 16.06, 16.00, 15.9, -4.1, -4.2, -4.3, -4.7, -4.83, -4.85, -5.3, -5.4; HRMS (TOF+) calcd. for  $\text{C}_{47}\text{H}_{96}\text{O}_7\text{Si}_4\text{Na}$  ( $\text{M}+\text{Na}$ ) 907.6125, found 907.6106.

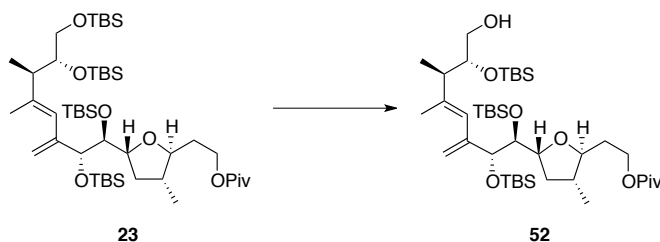

**Alcohol 52:** To a stirred solution of TBS ether **23** (264 mg, 0.298 mmol) in THF (3.3 mL) at  $0\text{ }^\circ\text{C}$  was added a stock solution of  $\text{HF}\cdot\text{pyr}$  (1.2 mL).<sup>5</sup> After 32 h, the reaction was quenched with sat. aq.  $\text{NaHCO}_3$  (3.0 mL) and the aqueous layer was extracted with  $\text{EtOAc}$  /  $\text{Et}_2\text{O}$  (1:1, 4 X 30 mL). The dried ( $\text{MgSO}_4$ ) extract was concentrated *in vacuo* and purified by flash chromatography over silica gel, eluting with 6-12%  $\text{EtOAc}$  / hexanes, to give alcohol **52** (186 mg, 0.241 mmol, 81%) as colorless oil:  $[\alpha]_D^{23} = +22.5$  ( $c = 1.01$ ,  $\text{CHCl}_3$ ); IR: (neat) 3420, 2956, 2925, 2879, 2855, 1727, 1470, 1454, 1283, 1248, 1162, 1069, 839, 773  $\text{cm}^{-1}$ ;  $^1\text{H}$  NMR (400 MHz,  $\text{CDCl}_3$ )  $\delta$  5.73 (s, 1H), 5.31 (t,  $J = 1.7$  Hz, 1H), 4.97 (s, 1H), 4.26 (ddd,  $J = 10.8, 7.2, 4.8$  Hz, 1H), 4.10-4.16 (m, 2H), 3.95 (ddd,  $J = 9.9, 7.0, 6.1$

Hz, 1H), 3.78 (dt,  $J = 5.5, 4.8$  Hz, 1H), 3.53-3.57 (m, 3H), 3.35 (td,  $J = 9.0, 2.8$  Hz, 1H), 2.46-2.53 (m, 1H), 2.06 (dt,  $J = 12.1, 6.3$  Hz, 1H), 1.85-1.93 (m, 1H), 1.80 (d,  $J = 1.1$  Hz, 3H), 1.62-1.75 (m, 2H), 1.21-1.30 (m, 1H), 1.20 (s, 9H), 1.07 (d,  $J = 7.1$  Hz, 3H), 0.98 (d,  $J = 6.4$  Hz, 3H), 0.92 (s, 9H), 0.918 (s, 9H), 0.915 (s, 9H), 0.11 (s, 3H), 0.10 (s, 3H), 0.09 (s, 3H), 0.08 (s, 3H), 0.05 (s, 3H), 0.02 (s, 3H);  $^{13}\text{C}$  NMR (100 MHz,  $\text{CDCl}_3$ )  $\delta$  178.4, 145.1, 140.6, 125.4, 114.8, 80.5, 79.4, 78.9, 78.6, 75.2, 64.4, 62.0, 46.4, 40.3, 38.6, 38.1, 33.1, 27.2, 26.1, 25.9, 25.8, 18.4, 18.3, 18.1, 16.0, 14.7, -4.2, -4.3, -4.6, -4.7; HRMS (ES+) calcd. for  $\text{C}_{41}\text{H}_{82}\text{O}_7\text{Si}_3\text{Na}$  (M+Na) 793.5266, found 793.5232.

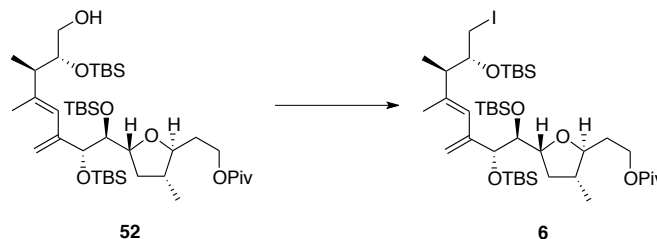

**Iodide 6:** To a stirred solution of alcohol **52** (186 mg, 0.241 mmol) in benzene (6.0 mL) at 5 °C were sequentially added imidazole (82.1 mg, 1.20 mmol),  $\text{PPh}_3$  (190 mg, 0.723 mmol) and  $\text{I}_2$  (153 mg, 0.602 mmol). After 10 min, the reaction was warmed to rt and wrapped with aluminum foil. After 1 h, the reaction was quenched with sat. aq.  $\text{Na}_2\text{S}_2\text{O}_3$  (20 mL) and the aqueous layer was extracted with  $\text{Et}_2\text{O}$  (3 X 40 mL). The dried ( $\text{MgSO}_4$ ) extract was concentrated *in vacuo* and purified by flash chromatography over silica gel, eluting with 2-5%  $\text{EtOAc}$  / hexanes, to give iodide **6** (191 mg, 0.216 mmol, 90%) as colorless oil:  $[\alpha]_{\text{D}}^{23} = +27.6$  ( $c = 1.02$ ,  $\text{CHCl}_3$ ); IR: (neat) 2955, 2923, 2853, 1730, 1472, 1460, 1253, 1159, 1073, 1037, 834, 775  $\text{cm}^{-1}$ ;  $^1\text{H}$  NMR (700 MHz,  $\text{CDCl}_3$ )  $\delta$  5.82 (s, 1H), 5.34 (dd,  $J = 2.1, 1.4$  Hz, 1H), 4.99 (s, 1H), 4.27 (ddd,  $J = 10.8, 7.2, 4.8$  Hz, 1H), 4.12-4.16 (m, 2H), 3.98 (ddd,  $J = 9.9, 6.8, 6.1$  Hz, 1H), 3.69 (dt,  $J = 6.7, 4.4$  Hz, 1H), 3.56 (dd,  $J = 6.9, 3.1$  Hz, 1H), 3.37 (td,  $J = 9.1, 2.8$  Hz, 1H), 3.18 (dd,  $J = 10.0, 4.3$  Hz, 1H), 3.15 (dd,  $J = 10.0, 6.8$  Hz, 1H), 2.67 (qd,  $J = 6.9, 4.7$  Hz, 1H), 2.06 (dt,  $J = 12.2, 6.2$  Hz, 1H), 1.88-1.92 (m, 1H), 1.80-1.85 (m, 1H), 1.81 (d,  $J = 1.3$  Hz, 3H), 1.65-1.70 (m, 1H), 1.27-1.32 (m, 1H), 1.21 (s, 9H), 1.06 (d,  $J = 7.0$  Hz, 3H), 0.99 (d,  $J = 6.4$  Hz, 3H), 0.93 (s, 9H), 0.92 (s, 18H), 0.14 (s, 3H), 0.108 (s, 3H), 0.106 (s, 3H), 0.09 (s, 3H), 0.06 (s, 3H), 0.03 (s, 3H);  $^{13}\text{C}$  NMR (176 MHz,  $\text{CDCl}_3$ )  $\delta$  178.4, 145.0, 139.5, 126.3, 115.2, 80.5, 79.2, 78.6, 78.5, 74.9, 62.1, 47.1, 40.3, 38.7, 38.1, 33.2, 27.2, 26.2, 26.0, 25.8, 18.4, 18.3, 18.0, 16.1, 16.0, 15.0, 11.4, -4.0, -4.1, -4.2, -4.73, -4.75; HRMS (ES+) calcd. for  $\text{C}_{41}\text{H}_{81}\text{O}_6\text{Si}_3\text{I}\text{Na}$  (M+Na) 903.4283, found 903.4263.

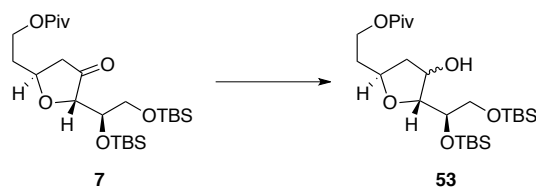

**Alcohol 53:** To a stirred solution of ketone **7** (3.30 g, 6.57 mmol) in MeOH (83.0 mL) at rt was added NaBH<sub>4</sub> (249 mg, 6.57 mmol). After 1 h, the reaction was quenched with sat. aq. NH<sub>4</sub>Cl (50 mL) and the MeOH was removed *in vacuo*. EtOAc (150 mL) was added to the residue and the aqueous layer was extracted with EtOAc (3 X 150 mL). The dried (MgSO<sub>4</sub>) extract was concentrated *in vacuo* and purified by flash chromatography over silica gel, eluting with 10-20% EtOAc / hexanes, to give diastereomeric alcohol **53** (3.17 g, 6.27 mmol, 95%) as colorless oil. Analytically pure samples of the individual diastereomers could be obtained via chromatography over silica gel, eluting with 10-20% EtOAc / hexanes, to give sequentially the major diastereomer followed by the minor diastereomer. **53** Major Isomer:  $[\alpha]_D^{23} = -30.8$  ( $c = 1.00$ , CHCl<sub>3</sub>); IR: (neat) 3490, 2960, 2929, 2855, 1731, 1470, 1287, 1260, 1158, 1092, 835, 781 cm<sup>-1</sup>; <sup>1</sup>H NMR (700 MHz, CDCl<sub>3</sub>)  $\delta$  4.40 (bs, 1H), 4.34-4.38 (m, 1H), 4.24 (ddd,  $J = 10.9, 6.2, 5.4$  Hz, 1H), 4.16 (ddd,  $J = 10.9, 8.3, 6.1$  Hz, 1H), 3.97 (ddd,  $J = 8.8, 8.3, 3.8$  Hz, 1H), 3.70 (dd,  $J = 8.0, 3.1$  Hz, 1H), 3.58-3.65 (m, 2H), 2.15 (dd,  $J = 12.9, 5.2$  Hz, 1H), 1.81-1.90 (m, 2H), 1.70 (ddt,  $J = 1.9, 4.6, 11.6$  Hz, 1H), 1.21 (s, 9H), 0.93 (s, 9H), 0.90 (s, 9H), 0.139 (s, 6H), 0.133 (s, 3H), 0.11 (s, 3H); <sup>13</sup>C NMR (176 MHz, CDCl<sub>3</sub>)  $\delta$  178.5, 87.2, 74.0, 72.7, 65.8, 61.9, 41.2, 38.7, 35.0, 27.2, 25.8, 18.3, 18.2, -4.4, -4.9, -5.68, -5.69; HRMS (ES+) calcd. for C<sub>25</sub>H<sub>53</sub>O<sub>6</sub>Si<sub>2</sub> (M+H) 505.3381, found 505.3394.

**53** Minor Isomer:  $[\alpha]_D^{23} = -28.7$  ( $c = 1.01$ , CHCl<sub>3</sub>); IR: (neat) 3490, 2960, 2925, 2859, 1734, 1715, 1474, 1256, 1155, 1092, 839, 777 cm<sup>-1</sup>; <sup>1</sup>H NMR (700 MHz, CDCl<sub>3</sub>)  $\delta$  4.24-4.28 (m, 1H), 4.19-4.22 (m, 1H), 4.10-4.17 (m, 2H), 3.68-3.70 (m, 3H), 3.64 (dd,  $J = 12.0, 5.9$  Hz, 1H), 3.39 (m, 1H), 2.42 (ddd,  $J = 12.0, 7.0, 6.2$  Hz, 1H), 1.93-1.97 (m, 1H), 1.87-1.92 (m, 1H), 1.72 (dt,  $J = 8.8, 12.1$  Hz, 1H), 1.21 (s, 9H), 0.92 (s, 9H), 0.90 (s, 9H), 0.127 (s, 3H), 0.124 (s, 3H), 0.10 (s, 3H), 0.09 (s, 3H); <sup>13</sup>C NMR (176 MHz, CDCl<sub>3</sub>)  $\delta$  178.5, 86.1, 74.7, 74.1, 72.9, 65.5, 61.6, 40.4, 38.7, 35.4, 27.2, 25.8, 18.28, 18.24, -4.5, -4.7, -5.3, -5.4; HRMS (ES+) calcd. for C<sub>25</sub>H<sub>35</sub>O<sub>6</sub>Si<sub>2</sub> (M+H) 505.3381, found 505.3394.

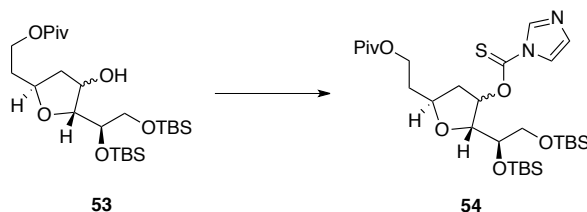

**Thioate 54:** To a stirred solution of diastereomeric alcohol **53** (3.17 g, 6.27 mmol) in deoxygenated toluene (75.0 mL) at rt was added thiocarbonyl-diimidazole (3.36 g, 18.8 mmol) heated to 100 °C. After 20 h, the solvent was removed *in vacuo*. The residue was directly loaded onto column and purified by

flash chromatography over silica gel, eluting with 15-30% EtOAc / hexanes, to give diastereomeric thioate **54** (3.82 g, 6.21 mmol, 99%) as colorless oil. Analytically pure samples of the individual diastereomers could be obtained via chromatography over silica gel, eluting with 15-30% EtOAc / hexanes, to give sequentially the major diastereomer followed by the minor diastereomer. **54** Major Isomer:  $[\alpha]_D^{23} = -14.5$  ( $c = 1.02$ ,  $\text{CHCl}_3$ ); IR: (neat) 2953, 2929, 2894, 2855, 1727, 1474, 1392, 1283, 1244, 1151, 1104, 832, 781  $\text{cm}^{-1}$ ;  $^1\text{H}$  NMR (700 MHz,  $\text{CDCl}_3$ )  $\delta$  8.31 (s, 1H), 7.60 (s, 1H), 7.09 (dd,  $J = 1.6, 0.8$  Hz, 1H), 5.97 (t,  $J = 3.3$  Hz, 1H), 4.30-4.34 (m, 1H), 4.25 (ddd,  $J = 11.0, 6.3, 5.3$  Hz, 1H), 4.19 (ddd,  $J = 11.0, 8.1, 6.2$  Hz, 1H), 4.13 (dd,  $J = 7.8, 3.1$  Hz, 1H), 3.95 (dt,  $J = 7.8, 4.5$  Hz, 1H), 3.57-3.61 (m, 2H), 2.52 (ddd,  $J = 14.3, 6.2, 0.9$  Hz, 1H), 2.06 (ddd,  $J = 14.3, 9.1, 4.6$  Hz, 1H), 1.87-1.94 (m, 2H), 1.21 (s, 9H), 0.92 (s, 9H), 0.83 (s, 9H), 0.14 (s, 3H), 0.13 (s, 3H), -0.02 (s, 3H), -0.04 (s, 3H);  $^{13}\text{C}$  NMR (176 MHz,  $\text{CDCl}_3$ )  $\delta$  182.6, 178.4, 136.6, 131.0, 117.7, 84.4, 82.2, 73.8, 72.6, 66.0, 61.5, 39.3, 38.7, 35.0, 27.2, 25.9, 25.8, 18.5, 18.3, -4.4, -4.6, -5.4, -5.5; HRMS (ES+) calcd. for  $\text{C}_{29}\text{H}_{55}\text{O}_6\text{N}_2\text{Si}_2\text{S}$  (M+H) 615.3319, found 615.3309.

**54** Minor Isomer:  $[\alpha]_D^{23} = -21.4$  ( $c = 1.04$ ,  $\text{CHCl}_3$ ); IR: (neat) 2956, 2929, 2883, 2855, 1727, 1470, 1396, 1337, 1287, 1244, 1228, 1158, 1088, 835, 773  $\text{cm}^{-1}$ ;  $^1\text{H}$  NMR (700 MHz,  $\text{CDCl}_3$ )  $\delta$  8.36 (s, 1H), 7.64 (t,  $J = 1.4$  Hz, 1H), 7.09 (dd,  $J = 1.6, 0.8$  Hz, 1H), 6.00 (ddd,  $J = 7.3, 2.8, 2.1$  Hz, 1H), 4.44 (t,  $J = 2.1$  Hz, 1H), 4.38-4.42 (m, 1H), 4.23 (ddd,  $J = 11.1, 6.1, 5.6$  Hz, 1H), 4.19 (ddd,  $J = 11.1, 8.1, 5.8$  Hz, 1H), 3.93 (ddd,  $J = 7.7, 4.8, 2.8$  Hz, 1H), 3.71 (dd,  $J = 9.8, 7.8$  Hz, 1H), 3.58 (dd,  $J = 9.8, 4.9$  Hz, 1H), 2.75 (dt,  $J = 14.0, 7.4$  Hz, 1H), 1.96-2.01 (m, 1H), 1.89-1.94 (m, 2H), 1.21 (s, 9H), 0.90 (s, 18H), 0.15 (s, 3H), 0.13 (s, 3H), 0.09 (s, 3H), 0.08 (s, 3H);  $^{13}\text{C}$  NMR (176 MHz,  $\text{CDCl}_3$ )  $\delta$  183.5, 178.5, 136.9, 130.9, 117.8, 86.9, 83.2, 74.3, 63.5, 61.6, 38.7, 38.5, 35.4, 27.2, 25.9, 18.3, 17.9, -4.2, -4.7, -5.32, -5.35; HRMS (ES+) calcd. for  $\text{C}_{29}\text{H}_{55}\text{O}_6\text{N}_2\text{Si}_2\text{S}$  (M+H) 615.3319, found 615.3298.

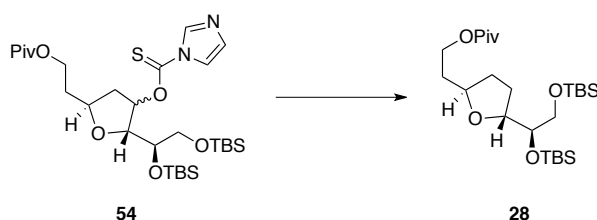

**Tetrahydrofuran 28:** To a stirred solution of thioate **54** (3.82 g, 6.21 mmol) in deoxygenated toluene (340.0 mL) at rt was added AIBN (102 mg, 0.621 mmol) and heated to 95 °C.  $\text{Bu}_3\text{SnH}$  (3.61 g, 3.4 mL, 12.4 mmol) was added dropwise over 45 min. After additional 1.5 h, the reaction was cooled down to rt and the solvent was removed *in vacuo*. The residue was directly loaded onto the column and purified by flash chromatography over silica gel, eluting with 3-6% EtOAc / hexanes, to give tetrahydrofuran **28** (2.76 g, 5.65 mmol, 91%) as colorless oil:  $[\alpha]_D^{23} = -21.6$  ( $c = 1.02$ ,  $\text{CHCl}_3$ ); IR: (neat) 2958, 2931, 2859, 1734, 1474, 1288, 1255, 1156, 1097, 836, 779  $\text{cm}^{-1}$ ;  $^1\text{H}$  NMR (400 MHz,  $\text{CDCl}_3$ )  $\delta$  4.12-4.22 (m, 2H), 3.98-4.10 (m, 2H), 3.67 (dd,  $J = 11.6, 7.8$  Hz, 1H), 3.55-3.59 (m,



2H), 2.02-2.09 (m, 1H), 1.74-1.98 (m, 4H), 1.51 (ddd,  $J = 18.2, 11.7, 8.6$  Hz, 1H), 1.20 (s, 9H), 0.909 (s, 9H), 0.905 (s, 9H), 0.091 (s, 3H), 0.089 (s, 3H), 0.07 (s, 3H), 0.06 (s, 3H);  $^{13}\text{C}$  NMR (176 MHz,  $\text{CDCl}_3$ )  $\delta$  178.6, 78.9, 76.2, 75.8, 65.0, 62.1, 38.7, 34.8, 32.5, 27.5, 27.2, 26.0, 25.9, 18.4, 18.2, -4.2, -4.7, -5.3; HRMS (ES+) calcd. for  $\text{C}_{25}\text{H}_{53}\text{O}_5\text{Si}_2$  (M+H) 489.3432, found 489.3418.

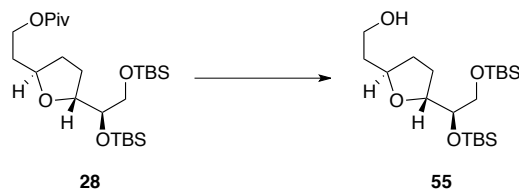

**Alcohol 55:** To a stirred solution of pivaloyl ester **28** (1.51 g, 3.08 mmol) in  $\text{Et}_2\text{O}$  (58.0 mL) at  $0^\circ\text{C}$  was added  $\text{LiAlH}_4$  (235 mg, 6.17 mmol) in one portion. After 30 min, the reaction was quenched with dropwise addition of  $\text{H}_2\text{O}$  (3.0 mL) and the organic layer was decanted. The solid formed was washed with  $\text{Et}_2\text{O}$  (3 X 50 mL). The dried ( $\text{MgSO}_4$ ) extract was concentrated *in vacuo* and purified by flash chromatography over silica gel, eluting with 15-20%  $\text{EtOAc}$ / hexanes, to give alcohol **55** (1.20 g, 2.96 mmol, 96%) as colorless oil:  $[\alpha]_D^{23} = -20.8$  ( $c = 1.01$ ,  $\text{CHCl}_3$ ); IR: (neat) 3443, 2953, 2921, 2879, 2851, 1470, 1458, 1260, 1081, 1003, 835,  $777\text{cm}^{-1}$ ;  $^1\text{H}$  NMR (400 MHz,  $\text{CDCl}_3$ )  $\delta$  4.12-4.19 (m, 2H), 3.78-3.82 (m, 2H), 3.65 (dd,  $J = 11.2, 8.1$  Hz, 1H), 3.54-3.59 (m, 2H), 3.01-3.04 (m, 1H), 2.02-2.09 (m, 1H), 1.92-2.00 (m, 1H), 1.68-1.87 (m, 3H), 1.58 (ddd,  $J = 18.2, 11.8, 8.6$  Hz, 1H), 0.98 (t,  $J = 7.9$  Hz, 9H), 0.91 (s, 9H), 0.90 (s, 9H), 0.09 (s, 6H), 0.07 (s, 3H), 0.06 (s, 3H);  $^{13}\text{C}$  NMR (176 MHz,  $\text{CDCl}_3$ )  $\delta$  80.2, 79.3, 75.5, 64.8, 62.0, 37.0, 32.6, 27.2, 25.99, 25.90, 18.3, 18.1, -4.2, -4.7, -5.4; HRMS (ES+) calcd. for  $\text{C}_{20}\text{H}_{45}\text{O}_4\text{Si}_2$  (M+H) 405.2856, found 405.2871.

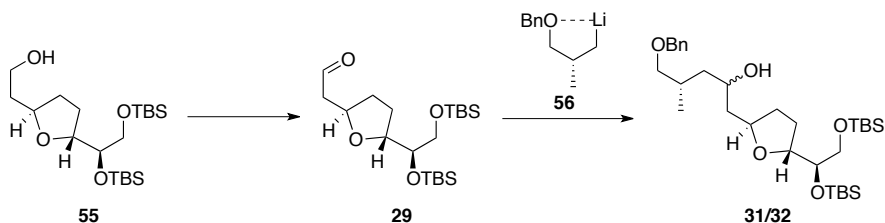

**Alcohols 31 and 32:** To a stirred solution of oxalyl chloride (377 mg, 0.26 mL, 2.97 mmol) in  $\text{CH}_2\text{Cl}_2$  (18.0 mL) at  $-78^\circ\text{C}$  was cannulated a solution of DMSO (483 mg, 0.44 mL, 6.19 mmol) in  $\text{CH}_2\text{Cl}_2$  (2.9 mL). After 10 min, a solution of alcohol **55** (1.00 g, 2.47 mmol) in  $\text{CH}_2\text{Cl}_2$  (5.0 mL) was cannulated to it. After 40 min,  $\text{Et}_3\text{N}$  (1.25 g, 1.8 mL, 12.37 mmol) was added and the cooling bath was removed. After 15 min, the reaction was quenched with  $\text{H}_2\text{O}$  (30 mL) and the aqueous layer was extracted with  $\text{CH}_2\text{Cl}_2$  (3 X 100 mL). The dried ( $\text{MgSO}_4$ ) extract was concentrated *in vacuo* and was quickly passed through a short plug of silica gel to give the crude aldehyde **29**.

To a solution of iodide **30**<sup>8</sup> (860 mg, 2.96 mmol) in  $\text{Et}_2\text{O}$  (50.0 mL) at  $-78^\circ\text{C}$  was added  $t\text{-BuLi}$  (3.5 mL, 5.93 mmol, 1.7 M in pentane). After 10 min, the reaction was warmed to rt for 25 min and then cooled back down to  $-78^\circ\text{C}$ . A

solution of the crude aldehyde **29** in Et<sub>2</sub>O (35.0 mL and 2 X 2.5 mL wash) was cannulated to it. After 30 min, the reaction was quenched with sat. aq. NH<sub>4</sub>Cl (35 mL) and the aqueous layer was extracted with Et<sub>2</sub>O (3 X 100 mL). The dried (MgSO<sub>4</sub>) extract was concentrated *in vacuo* and purified by flash chromatography over silica gel, eluting with 5-10% EtOAc / hexanes, to give diastereomeric alcohols **31** and **32** (1.00 g, 1.78 mmol, 72%, 1.5:1 dr) as colorless oil: Major alcohol **31**:  $[\alpha]_D^{23} = -14.4$  ( $c = 1.01$ , CHCl<sub>3</sub>); IR: (neat) 3490, 2957, 2929, 2872, 2858, 1458, 1253, 1095, 835, 776, cm<sup>-1</sup>; <sup>1</sup>H NMR (700 MHz, CDCl<sub>3</sub>)  $\delta$  7.35-7.36 (m, 4H), 7.28-7.30 (m, 1H), 4.53 (s, 2H), 4.13-4.17 (m, 2H), 3.93 (t,  $J = 9.0$  Hz, 2H), 3.88 (s, 1H), 3.66 (dd,  $J = 11.7, 8.1$  Hz, 1H), 3.56-3.58 (m, 2H), 3.39 (dd,  $J = 9.1, 6.1$  Hz, 1H), 3.31 (dd,  $J = 9.1, 6.5$  Hz, 1H), 2.05-2.09 (m, 2H), 1.92-1.96 (m, 1H), 1.79-1.85 (m, 1H), 1.63-1.65 (m, 1H), 1.59 (ddd,  $J = 13.7, 9.0, 5.2$  Hz, 1H), 1.48-1.56 (m, 2H), 1.25 (ddd,  $J = 13.7, 8.2, 3.7$  Hz, 1H), 1.00 (d,  $J = 6.7$  Hz, 3H), 0.914 (s, 9H), 0.910 (s, 9H), 0.10 (s, 3H), 0.09 (s, 3H), 0.073 (s, 3H), 0.070 (s, 3H); <sup>13</sup>C NMR (176 MHz, CDCl<sub>3</sub>)  $\delta$  138.7, 128.2, 127.5, 127.3, 80.0, 79.4, 76.4, 75.7, 72.8, 69.4, 65.0, 43.3, 42.1, 33.0, 30.2, 26.9, 25.98, 25.90, 18.3, 18.1, 17.3, -4.2, -4.7, -5.3, -5.4; HRMS (ES+) calcd. for C<sub>31</sub>H<sub>59</sub>O<sub>5</sub>Si<sub>2</sub> (M+H) 567.3901, found 567.3882.

#### Mosher ester determination of stereochemistry in compound **31**<sup>7</sup>

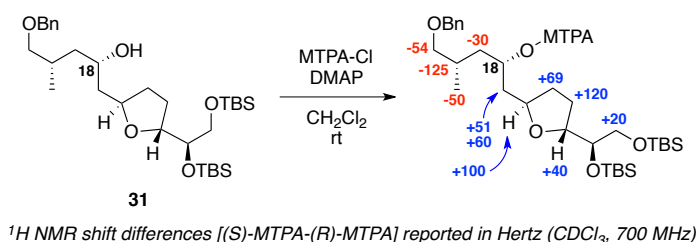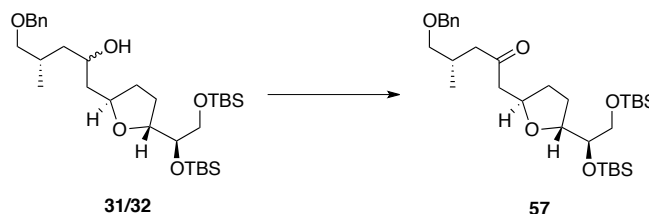

**Ketone 57**: To a stirred solution of diastereomeric alcohols **31/32** (747 mg, 1.31 mmol) in CH<sub>2</sub>Cl<sub>2</sub> (26.0 mL) with 4 Å mol. sieves (500 mg) were added NMO (463 mg, 3.95 mmol) followed by TPAP (46.3 mg, 0.131 mmol). After 30 min, the reaction was directly loaded onto column and purified by flash chromatography over silica gel, eluting with 10-15% EtOAc / hexanes, to give ketone **57** (708 mg, 1.25 mmol, 95%) as colorless oil:  $[\alpha]_D^{23} = -12.6$  ( $c = 1.03$ , CHCl<sub>3</sub>); IR: (neat) 2954, 2929, 2856, 1713, 1471, 1361, 1253, 1096, 835, 777, 735 cm<sup>-1</sup>; <sup>1</sup>H NMR (700 MHz, CDCl<sub>3</sub>)  $\delta$  7.33-7.37 (m, 4H), 7.28-7.31 (m, 1H), 4.49 (s, 2H), 4.32 (ddd,  $J = 12.3, 8.6, 6.2$  Hz, 1H), 4.08 (td,  $J = 7.4, 3.4$  Hz, 1H), 3.66 (dd,  $J = 11.7, 7.9$  Hz, 1H), 3.55-3.57 (m, 2H), 3.35 (dd,  $J = 9.2, 5.6$  Hz, 1H), 3.28 (dd,  $J = 9.2, 6.8$  Hz, 1H), 2.72 (dd,  $J = 15.5, 6.8$  Hz, 1H), 2.62 (dd,  $J = 16.3,$



1.48 (m, 1H (2 diastereomers)), 1.31-1.37 (m, 1H (2 diastereomers)), 1.30 (d,  $J = 5.2$  Hz, 3H (2 diastereomers)), 1.21 (t,  $J = 7.0$  Hz, 3H (2 diastereomers)), 1.01 (d,  $J = 6.6$  Hz, 3H (1 diastereomer)), 1.00 (d,  $J = 6.6$  Hz, 3H (1 diastereomer)), 0.91 (s, 9H (2 diastereomers)), 0.90 (s, 9H (2 diastereomers)), 0.094 (s, 3H), 0.090 (s, 3H), 0.08 (s, 3H)), 0.07 (s, 3H));  $^{13}\text{C}$  NMR (176 MHz,  $\text{CDCl}_3$ )  $\delta$  138.8, 138.7, 128.3, 128.2, 127.5, 127.4, 127.3, 99.6, 98.3, 78.6, 78.5, 76.4, 76.3, 76.2, 76.0, 72.9, 72.87, 72.84, 71.9, 65.1, 60.7, 60.5, 41.8, 41.2, 39.0, 38.6, 33.2, 32.9, 29.8, 29.7, 27.39, 27.36, 26.0, 25.9, 20.9, 20.7, 18.4, 18.1, 17.3, 17.0, 15.4, 15.3, -4.1, -4.2, -4.6, -4.7; HRMS (ES+) calcd. for  $\text{C}_{35}\text{H}_{66}\text{O}_6\text{Si}_2\text{Na}$  ( $\text{M}+\text{Na}$ ) 661.4296, found 661.4295.

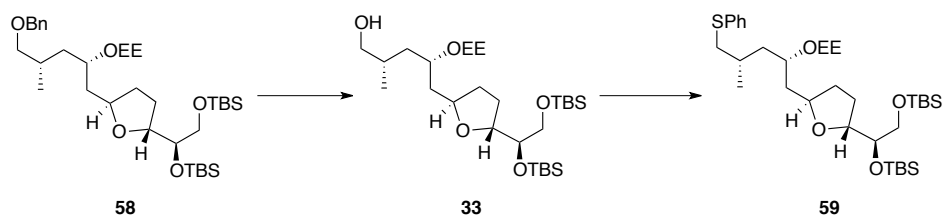

**Sulfide 59:** To a stirred solution of benzyl ether **58** (756 mg, 1.18 mmol) in *i*-PrOH (49.0 mL) was added Pd/C (510 mg, 10 mol% by weight). The flask was fitted with a  $\text{H}_2$  balloon and purged with  $\text{H}_2$ . After 18 h, the reaction was passed through a plug of celite and the celite plug was washed with EtOAc (100 mL). The solvent was removed *in vacuo* to give the crude alcohol **33**.

To a stirred solution of crude alcohol **33** in THF (7.0 mL) at 0 °C were added  $\text{Ph}_2\text{S}_2$  (426 mg, 1.95 mmol) followed by  $n\text{-Bu}_3\text{P}$  (413 mg, 0.52 mL, 2.04 mmol) and the reaction was warmed to rt. After 15 h, the solvent was removed *in vacuo* and the residue was purified by flash chromatography over silica gel, eluting with 5-10% EtOAc / hexanes, to give sulfide **59** (592 mg, 0.923 mmol, 78%) as colorless oil:  $[\alpha]_{\text{D}}^{23} = -36.9$  ( $c = 1.03$ ,  $\text{C}_6\text{H}_6$ ); IR: (neat) 2955, 2929, 2857, 1472, 1376, 1253, 1091, 959, 835, 776, 736, 690  $\text{cm}^{-1}$ ;  $^1\text{H}$  NMR (400 MHz,  $\text{CDCl}_3$ )  $\delta$  7.33-7.36 (m, 2H (2 diastereomers)), 7.25-7.29 (m, 2H (2 diastereomers)), 7.13-7.18 (m, 1H (2 diastereomers)), 4.70 (q,  $J = 5.2$  Hz, 1H (1 diastereomer)), 4.64 (q,  $J = 5.2$  Hz, 1H (1 diastereomer)), 4.05-4.11 (m, 1H (2 diastereomers)), 3.92-4.01 (m, 1H (2 diastereomers)), 3.82-3.88 (m, 1H (1 diastereomer)), 3.72-3.79 (m, 1H (1 diastereomer)), 3.64-3.71 (m, 1H (2 diastereomers)), 3.50-3.62 (m, 3H (2 diastereomers)), 3.37-3.47 (m, 1H (1 diastereomer)), 2.93-2.99 (m, 1H (2 diastereomers)), 2.74-2.81 (m, 1H (2 diastereomers)), 1.87-2.10 (m, 3H (2 diastereomers)), 1.68-1.85 (m, 3H (2 diastereomers)), 1.51-1.58 (m, 1H (2 diastereomers)), 1.39-1.48 (m, 2H (2 diastereomers)), 1.27 (d,  $J = 5.2$  Hz, 3H (1 diastereomer)), 1.23 (d,  $J = 5.2$  Hz (1 diastereomer)), 1.19 (t,  $J = 7.0$  Hz, 3H (1 diastereomer)), 1.14 (t,  $J = 7.0$  Hz, 3H (1 diastereomer)), 1.08 (d,  $J = 6.5$  Hz, 3H (1 diastereomer)), 1.07 (d,  $J = 6.5$  Hz, 3H (1 diastereomer)), 0.91 (s, 18H (2 diastereomers)), 0.09 (s, 6H (2 diastereomers)), 0.073 (s, 3H (2 diastereomers)), 0.070 (s, 3H (2 diastereomers));  $^{13}\text{C}$  NMR (100 MHz,  $\text{CDCl}_3$ )  $\delta$  137.4, 129.1, 129.0, 128.79, 128.73, 125.6, 125.5, 99.8, 98.1, 78.6, 78.5, 77.2, 76.24, 76.20, 76.1, 73.1, 71.8,

65.0, 60.7, 60.3, 41.99, 41.91, 41.6, 41.3, 41.1, 33.2, 33.0, 29.3, 27.3, 26.0, 25.9, 20.8, 20.6, 19.3, 19.1, 18.4, 18.1, 15.3, -4.1, -4.2, -4.7, -5.3; HRMS (ES+) calcd. for C<sub>34</sub>H<sub>64</sub>O<sub>5</sub>SSi<sub>2</sub>Na (M+Na) 663.3911, found 663.3882.

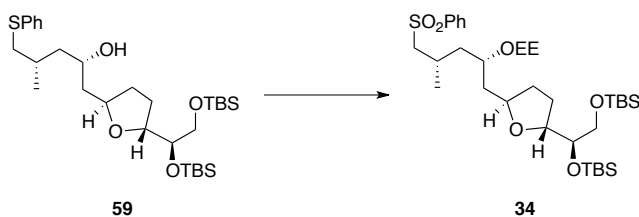

**Sulfone 34:** To a stirred solution of sulfide **59** (592 mg, 0.923 mmol) in CH<sub>3</sub>CN (16.0 mL) at rt were added NMO (325 mg, 2.77 mmol) followed by TPAP (163 mg, 0.461 mmol). After 12 h, the reaction was directly loaded onto column and purified by flash chromatography over silica gel, eluting with 10-30% EtOAc / hexanes, to give sulfone **34** (574 mg, 0.852 mmol, 92%) as colorless oil:  $[\alpha]_D^{23} = -27.8$  ( $c = 1.00$ , C<sub>6</sub>H<sub>6</sub>); IR: (neat) 2955, 2929, 2856, 1471, 1446, 1377, 1307, 1253, 1147, 1086, 835, 776, 689 cm<sup>-1</sup>; <sup>1</sup>H NMR (700 MHz, CDCl<sub>3</sub>)  $\delta$  7.93-7.96 (m, 2H (2 diastereomers)), 7.64-7.67 (m, 1H (2 diastereomers)), 7.56-7.59 (m, 2H (2 diastereomers)), 4.67 (q,  $J = 5.2$  Hz, 1H (1 diastereomer)), 4.62 (q,  $J = 5.2$  Hz, 1H (1 diastereomer)), 4.05-4.09 (m, 1H (2 diastereomers)), 3.88-3.94 (m, 1H (2 diastereomers)), 3.81-3.85 (m, 1H (1 diastereomer)), 3.69-3.72 (m, 1H (1 diastereomer)), 3.63-3.66 (m, 1H (2 diastereomers)), 3.59-3.63 (m, 1H (1 diastereomer)), 3.50-3.56 (m, 3H (1H of 1 diastereomer and 2H of 2 diastereomers)), 3.40-3.47 (m, 1H (2 diastereomers)), 3.23 (dd,  $J = 14.2, 4.7$  Hz, 1H (1 diastereomer)), 3.17 (dd,  $J = 14.2, 4.3$  Hz, 1H (1 diastereomer)), 2.97 (dd,  $J = 8.2, 5.5$  Hz, 1H (1 diastereomer)), 2.95 (dd,  $J = 8.3, 5.7$  Hz, 1H (1 diastereomer)), 2.32-2.37 (m, 1H (1 diastereomer)), 2.21-2.26 (m, 1H (1 diastereomer)), 1.96-2.01 (m, 1H (2 diastereomers)), 1.86-1.94 (m, 2H (1H of 1 diastereomer and 1H of 2 diastereomers)), 1.78-1.84 (m, 1H (2 diastereomers)), 1.72-1.76 (m, 1H (1 diastereomer)), 1.39-1.62 (m, 4H (2 diastereomers)), 1.23 (d,  $J = 5.2$  Hz, 3H (1 diastereomer)), 1.21 (d,  $J = 5.2$  Hz, 3H (1 diastereomer)), 1.19 (t,  $J = 7.1$  Hz, 3H (1 diastereomer)), 1.17 (t,  $J = 7.1$  Hz, 3H (1 diastereomer)), 1.148 (d,  $J = 6.6$  Hz, 3H (1 diastereomer)), 1.145 (d,  $J = 6.6$  Hz, 3H (1 diastereomer)), 0.909 (s, 9H (1 diastereomer)), 0.907 (s, 9H (1 diastereomer)), 0.89 (s, 9H (2 diastereomers)), 0.06-0.08 (m, 12H (2 diastereomers)); <sup>13</sup>C NMR (176 MHz, CDCl<sub>3</sub>)  $\delta$  141.2, 141.0, 133.5, 133.3, 129.2, 129.1, 128.04, 128.0, 99.9, 97.9, 78.6, 78.5, 76.0, 75.9, 72.9, 71.1, 65.0, 63.26, 63.20, 60.7, 60.6, 41.8, 41.7, 41.5, 40.7, 33.2, 33.0, 27.3, 27.2, 26.0, 25.9, 25.86, 25.83, 20.7, 20.6, 19.8, 19.7, 18.4, 18.1, 15.4, 15.3, -4.20, -4.22, -4.6, -4.7, -5.3; HRMS (ES+) calcd. for C<sub>34</sub>H<sub>64</sub>O<sub>7</sub>SSi<sub>2</sub>Na (M+Na) 695.3809, found 695.3818.

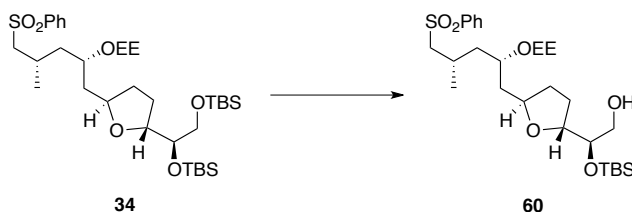

**Alcohol 60:** To a stirred solution of bis-TBS ether **34** (574 mg, 0.852 mmol) in THF (8.0 mL) at 0 °C was added a stock solution of HF·pyr<sup>5</sup> (4.8 mL) over 30 min. After 24 h, the reaction quenched with sat. aq. NaHCO<sub>3</sub> (50 mL) and the aqueous layer was extracted with EtOAc / Et<sub>2</sub>O (2:1, 3 X 100 mL). The dried (MgSO<sub>4</sub>) extract was concentrated *in vacuo* and purified by flash chromatography over silica gel, eluting with 20-60% EtOAc / hexanes, to give alcohol **60** (380 mg, 0.679 mmol, 80%) as colorless oil:  $[\alpha]_D^{23} = -30.2$  ( $c = 1.01$ , C<sub>6</sub>H<sub>6</sub>); IR: (neat) 3468, 2957, 2930, 2857, 1462, 1447, 1377, 1306, 1253, 1145, 1086, 1056, 836, 777, 689 cm<sup>-1</sup>; <sup>1</sup>H NMR (700 MHz, CDCl<sub>3</sub>)  $\delta$  7.93-7.95 (m, 2H (2 diastereomers)), 7.64-7.67 (m, 1H (2 diastereomers)), 7.56-7.59 (m, 2H (2 diastereomers)), 4.67 (q,  $J = 5.2$  Hz, 1H (1 diastereomer)), 4.63 (q,  $J = 5.2$  Hz, 1H (1 diastereomer)), 4.06-4.10 (m, 1H (2 diastereomers)), 3.94-4.01 (m, 1H (2 diastereomers)), 3.80-3.83 (m, 1H (1 diastereomer)), 3.65-3.71 (m, 3H (1H of 1 diastereomer and 2H of 2 diastereomers)), 3.56-3.61 (m, 2H (1H of 1 diastereomer and 1H of 2 diastereomers)), 3.52 (ddd,  $J = 14.0, 9.2, 7.0$  Hz, 1H (1 diastereomer)), 3.46 (ddd,  $J = 14.0, 9.2, 7.0$  Hz, 1H (1 diastereomer)), 3.42 (ddd,  $J = 14.0, 9.2, 7.0$  Hz, 1H (1 diastereomer)), 3.22 (dd,  $J = 14.2, 5.0$  Hz, 1H (1 diastereomer)), 3.16 (dd,  $J = 14.2, 4.6$  Hz, 1H (1 diastereomer)), 2.95-2.99 (m, 1H (2 diastereomers)), 2.45-2.47 (m, 1H (2 diastereomers)), 2.32-2.38 (m, 1H (1 diastereomer)), 2.21-2.28 (m, 1H (1 diastereomer)), 2.01-2.06 (m, 1H (2 diastereomers)), 1.88-1.97 (m, 2H (1H of 1 diastereomer and 1H of 2 diastereomers)), 1.72-1.79 (m, 2H (1H of 1 diastereomer and 1H of 2 diastereomers)), 1.61-1.69 (m, 1H (2 diastereomers)), 1.49-1.57 (m, 1H (2 diastereomers)), 1.42-1.48 (m, 2H (2 diastereomers)), 1.24 (d,  $J = 5.2$  Hz, 3H (1 diastereomer)), 1.23 (d,  $J = 5.2$  Hz, 3H (1 diastereomer)), 1.19 (t,  $J = 7.0$  Hz, 3H (1 diastereomer)), 1.17 (t,  $J = 7.0$  Hz, 3H (1 diastereomer)), 1.13 (d,  $J = 6.6$  Hz, 3H (1 diastereomer)), 1.12 (d,  $J = 6.7$  Hz, 3H (1 diastereomer)), 0.92 (s, 9H (2 diastereomers)), 0.112-0.117 (m, 6H (2 diastereomers)); <sup>13</sup>C NMR (176 MHz, CDCl<sub>3</sub>)  $\delta$  140.1, 140.0, 133.5, 133.4, 129.2, 129.1, 128.0, 127.9, 99.9, 97.7, 80.4, 80.3, 76.3, 76.2, 74.47, 74.42, 72.8, 70.7, 64.6, 63.13, 63.10, 60.5, 60.3, 41.7, 41.5, 40.6, 32.9, 32.7, 27.5, 25.88, 25.81, 25.78, 20.59, 20.50, 20.0, 19.7, 18.1, 15.4, 15.3, -4.5, -4.6; HRMS (ES+) calcd. for C<sub>28</sub>H<sub>50</sub>O<sub>7</sub>SSiNa (M+Na) 581.2944, found 581.2930.

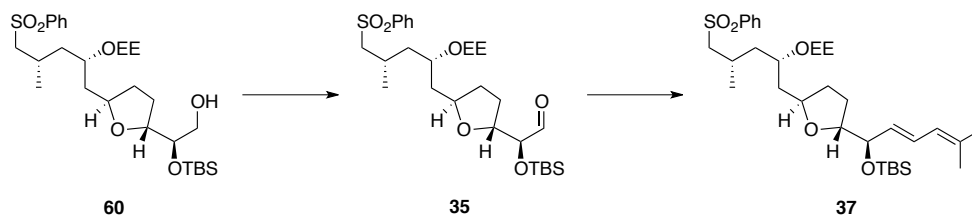

**Diene 37:** To a stirred solution of oxalyl chloride (103 mg, 72  $\mu$ L, 0.814 mmol) in  $\text{CH}_2\text{Cl}_2$  (4.2 mL) at  $-78^\circ\text{C}$  was cannulated a solution of DMSO (133 mg, 0.12 mL, 1.70 mmol) in  $\text{CH}_2\text{Cl}_2$  (1.2 mL). After 15 min, a solution of alcohol **60** (380 mg, 0.679 mmol) in  $\text{CH}_2\text{Cl}_2$  (2.0 mL and 2 X 0.5 mL wash) was cannulated to it. After 45 min,  $\text{Et}_3\text{N}$  (346 mg, 0.48 mL, 3.39 mmol) was added. After 10 min, the cooling bath was removed and the reaction was quenched with  $\text{H}_2\text{O}$  (20 mL). The aqueous layer was extracted with  $\text{CH}_2\text{Cl}_2$  (3 X 50 mL) and the dried ( $\text{MgSO}_4$ ) extract was concentrated *in vacuo* and was quickly passed through a short plug of silica gel to give the crude aldehyde **35**.

To a stirred solution of tributyl phosphonium salt **36** (341 mg, 0.970 mmol) in THF (7.6 mL) at  $-45^\circ\text{C}$  was added *n*-BuLi (0.40 mL, 1.00 mmol, 2.5 M in hexane) and was warmed to rt over 45 min. After 2 h, the reaction was cooled back down to  $-78^\circ\text{C}$  and a solution of the crude aldehyde **35** in THF (7.6 mL) was cannulated to it. The reaction was slowly warmed to rt over 2.5 h. After another 3 h, the reaction was quenched with  $\text{H}_2\text{O}$  (15 drops) and the solvent was removed *in vacuo*. The residue was purified by flash chromatography over silica gel, eluting with 10-30% EtOAc / hexanes, to give diene **37** (401 mg, 0.658 mmol, 97%, 11:1 *E:Z* inseparable mixture) as colorless oil:  $[\alpha]_{\text{D}}^{23} = +12.7$  ( $c = 1.02$ ,  $\text{C}_6\text{H}_6$ ); IR: (neat) 2956, 2928, 2856, 1446, 1378, 1308, 1253, 1148, 1086, 959, 836, 776, 689  $\text{cm}^{-1}$ ;  $^1\text{H}$  NMR (700 MHz,  $\text{CDCl}_3$ )  $\delta$  7.93-7.96 (m, 2H (2 diastereomers)), 7.64-7.67 (m, 1H (2 diastereomers)), 7.56-7.59 (m, 2H (2 diastereomers)), 6.43-6.47 (m, 1H (2 diastereomers of *E* isomer)), 6.21 (t,  $J = 11.2$  Hz, 1H of *Z* isomer), 6.06-6.09 (m, 1H of *Z* isomer), 5.83 (d,  $J = 11.0$  Hz, 1H (2 diastereomers of *E* isomer)), 5.53 (ddd,  $J = 14.1, 5.7, 3.1$  Hz, 1H (2 diastereomers of *E* isomer)), 5.29 (q,  $J = 10.1$  Hz, 1H of *Z* isomer), 4.67 (q,  $J = 5.2$  Hz, 1H (1 diastereomer)), 4.63 (q,  $J = 5.2$  Hz, 1H (1 diastereomer)), 4.46 (dd,  $J = 9.0, 5.2$  Hz, 1H of *Z* isomer), 4.16 (t,  $J = 5.6$  Hz, 1H (2 diastereomers)), 3.86-3.94 (m, 2H (2 diastereomers)), 3.79-3.83 (m, 1H (1 diastereomer)), 3.67-3.71 (m, 1H (1 diastereomer)), 3.60 (ddd,  $J = 14.1, 9.2, 7.0$  Hz, 1H (1 diastereomer)), 3.53 (ddd,  $J = 14.1, 9.2, 7.0$  Hz, 1H (1 diastereomer)), 3.41-3.47 (m, 1H (2 diastereomers)), 3.25 (dd,  $J = 14.2, 4.7$  Hz, 1H (1 diastereomer)), 3.18 (dd,  $J = 14.2, 4.4$  Hz, 1H (1 diastereomer)), 2.95-2.99 (m, 1H (2 diastereomers)), 2.32-2.37 (m, 1H (1 diastereomer)), 2.21-2.26 (m, 1H (1 diastereomer)), 1.92-1.98 (m, 1H (2 diastereomers)), 1.84-1.91 (m, 2H (1H of 1 diastereomer and 1H of 2 diastereomers)), 1.79 (s, 3H (2 diastereomers)), 1.77 (s, 3H (2 diastereomers)), 1.67-1.75 (m, 2H (1H of 1 diastereomer and 1H of 2 diastereomers)), 1.57-1.66 (m, 1H (2 diastereomers)), 1.39-1.54 (m, 3H (2 diastereomers)), 1.24 (d,  $J = 5.2$  Hz, 3H (1 diastereomer)), 1.22 (d,  $J = 5.2$  Hz, 3H (1 diastereomer)), 1.19 (t,  $J = 7.0$  Hz, 3H (1 diastereomer)), 1.18 (t,  $J = 7.0$  Hz, 3H (1 diastereomer)), 1.154 (d,

$J = 6.6$  Hz, 3H (1 diastereomer)), 1.152 (d,  $J = 6.6$  Hz, 3H (1 diastereomer)), 0.921 (s, 9H (1 diastereomer)), 0.920 (s, 9H (1 diastereomer)), 0.05-0.08 (m, 6H (2 diastereomers));  $^{13}\text{C}$  NMR (176 MHz,  $\text{CDCl}_3$ )  $\delta$  140.2, 140.0, 135.04, 135.02, 133.5, 133.3, 129.97, 129.95, 129.2, 129.1, 128.0, 127.9, 127.45, 127.43, 124.7, 99.9, 98.0, 82.1, 82.0, 76.0, 75.7, 75.6, 72.8, 71.1, 63.19, 63.12, 60.6, 60.5, 41.8, 41.7, 41.6, 40.7, 32.9, 32.7, 27.24, 27.21, 25.9, 25.8, 20.7, 20.5, 20.0, 19.7, 18.2, 15.4, 15.3, -4.4, -4.6; HRMS (ES+) calcd. for  $\text{C}_{33}\text{H}_{56}\text{O}_6\text{SSiNa}$  ( $\text{M}+\text{Na}$ ) 631.3465, found 631.3459.

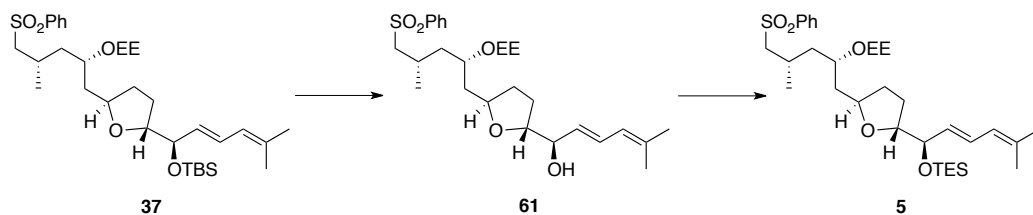

**Dienyl Sulfone 5:** To a stirred solution of TBS ether **37** (401 mg, 0.658 mmol) in THF (6.7 mL) at rt was added TBAF (2.0 mL, 2.00 mmol, 1 M in THF). After 12 h, the reaction quenched with  $\text{H}_2\text{O}$  (25 mL) and the aqueous layer was extracted with EtOAc /  $\text{Et}_2\text{O}$  (1:1, 3 X 50 mL). The dried ( $\text{MgSO}_4$ ) extract was concentrated *in vacuo* to give the crude alcohol **61**.

To a stirred solution of crude alcohol **61** in  $\text{CH}_2\text{Cl}_2$  (8.7 mL) at 0 °C were sequentially added  $\text{Et}_3\text{N}$  (523 mg, 0.73 mL, 5.17 mmol), DMAP (39.1 mg, 0.323 mmol) and TESCl (341 mg, 0.38 mL, 2.26 mmol). The reaction was slowly warmed to rt over 2 h. After another 3 h, the reaction was quenched with sat. aq.  $\text{NH}_4\text{Cl}$  (25 mL) and the aqueous layer was extracted with  $\text{Et}_2\text{O}$  (3 X 50 mL). The dried ( $\text{MgSO}_4$ ) extract was concentrated *in vacuo* and purified by flash chromatography over silica gel, eluting with 10-30% EtOAc / hexanes, to give dienyl sulfone **5** (379 mg, 0.622 mmol, 95%) as colorless oil:  $[\alpha]_{\text{D}}^{23} = +18.0$  ( $c = 1.00$ ,  $\text{C}_6\text{H}_6$ ); IR: (neat) 2957, 2913, 2876, 1446, 1377, 1308, 1148, 1086, 1018, 959, 841, 741, 689  $\text{cm}^{-1}$ ;  $^1\text{H}$  NMR (700 MHz,  $\text{CDCl}_3$ )  $\delta$  7.93-7.96 (m, 2H (2 diastereomers)), 7.64-7.67 (m, 1H (2 diastereomers)), 7.56-7.59 (m, 2H (2 diastereomers)), 6.42-6.46 (m, 1H (2 diastereomers of E isomer)), 6.21 (t,  $J = 11.3$  Hz, 1H of Z isomer), 6.07-6.09 (m, 1H of Z isomer), 5.82 (d,  $J = 11.0$  Hz, 1H (2 diastereomers of E isomer)), 5.52 (ddd,  $J = 15.0, 6.1, 3.0$  Hz, 1H (2 diastereomers of E isomer)), 5.29 (q,  $J = 10.2$  Hz, 1H of Z isomer), 4.66 (q,  $J = 5.2$  Hz, 1H (1 diastereomer)), 4.63 (q,  $J = 5.2$  Hz, 1H (1 diastereomer)), 4.46-4.48 (m, 1H of Z isomer), 4.15 (t,  $J = 5.6$  Hz, 1H (2 diastereomers)), 3.86-3.94 (m, 2H (2 diastereomers)), 3.78-3.82 (m, 1H (1 diastereomer)), 3.67-3.70 (m, 1H (1 diastereomer)), 3.60 (ddd,  $J = 14.1, 9.2, 7.0$  Hz, 1H (1 diastereomer)), 3.53 (ddd,  $J = 14.1, 9.2, 7.0$  Hz, 1H (1 diastereomer)), 3.41-3.47 (m, 1H (2 diastereomers)), 3.25 (dd,  $J = 14.2, 4.7$  Hz, 1H (1 diastereomer)), 3.17 (dd,  $J = 14.2, 4.4$  Hz, 1H (1 diastereomer)), 2.94-2.98 (m, 1H (2 diastereomers)), 2.31-2.36 (m, 1H (1 diastereomer)), 2.20-2.26 (m, 1H (1 diastereomer)), 1.92-1.98 (m, 1H (2 diastereomers)), 1.84-1.91 (m, 2H (1H of 1 diastereomer and 1H of 2 diastereomers)), 1.79 (s, 3H (2 diastereomers)), 1.77 (s, 3H (2 diastereomers)),



1.68-1.75 (m, 2H (1H of 1 diastereomer and 1H of 2 diastereomers)), 1.57-1.65 (m, 1H (2 diastereomers)), 1.38-1.53 (m, 3H (2 diastereomers)), 1.24 (d,  $J = 5.2$  Hz, 3H (1 diastereomer)), 1.22 (d,  $J = 5.2$  Hz, 3H (1 diastereomer)), 1.19 (t,  $J = 7.0$  Hz, 3H (1 diastereomer)), 1.17 (t,  $J = 7.0$  Hz, 3H (1 diastereomer)), 1.148 (d,  $J = 6.6$  Hz, 3H (1 diastereomer)), 1.147 (d,  $J = 6.6$  Hz, 3H (1 diastereomer)), 0.96 (t,  $J = 8.0$  Hz, 9H (2 diastereomers)), 0.61 (q,  $J = 7.9$  Hz, 6H (2 diastereomers));  $^{13}\text{C}$  NMR (176 MHz,  $\text{CDCl}_3$ )  $\delta$  140.2, 140.0, 135.13, 135.11, 133.5, 133.3, 129.96, 129.95, 129.2, 129.1, 128.0, 127.9, 127.54, 127.53, 124.6, 99.8, 98.0, 82.1, 82.0, 76.0, 75.68, 75.63, 72.8, 71.1, 63.17, 63.10, 60.6, 60.5, 41.9, 41.7, 41.6, 40.7, 32.9, 32.7, 27.32, 27.30, 25.9, 25.8, 20.6, 20.5, 19.9, 19.7, 18.2, 15.4, 15.3, 6.8, 5.0; HRMS (ES+) calcd. for  $\text{C}_{33}\text{H}_{56}\text{O}_6\text{SSiNa}$  ( $\text{M}+\text{Na}$ ) 631.3465, found 631.3466.

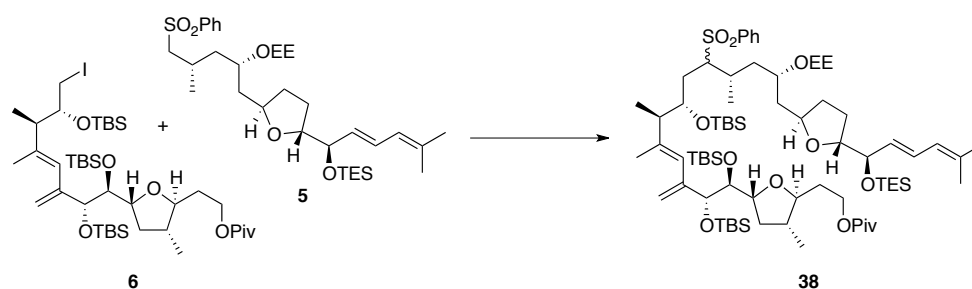

**Coupled sulfone 38:** To a stirred solution of sulfone **5** (325 mg, 0.533 mmol) in THF (2.2 mL) at  $-60$  °C was added LHMDS (0.54 mL, 0.540 mmol, 1 M in THF) and warmed to  $-10$  °C over 1 h. HMPA (515 mg, 0.50 mL, 2.87 mmol) was added and the reaction was warmed to  $0$  °C over 15 min. The reaction was cooled back down to  $-10$  °C and a solution of iodide **6** (188 mg, 0.213 mmol) in THF (2.0 mL and 2 X 0.35 mL wash) was cannulated to it and warmed to  $0$  °C. After 1.5 h, the cooling bath was removed. After another 1 h, the reaction was quenched with sat. aq.  $\text{NH}_4\text{Cl}$  (20 mL) and the aqueous layer was extracted with  $\text{Et}_2\text{O}$  (3 X 30 mL). The dried ( $\text{MgSO}_4$ ) extract was concentrated *in vacuo* and purified by flash chromatography over silica gel, eluting with 5-20%  $\text{EtOAc}$  / hexanes, to give diastereomeric coupled sulfone **38** (215 mg, 0.157 mmol, 74%) as colorless oil along with recovered sulfone **5** (191 mg, 0.313 mmol). Coupled sulfone **38**:  $[\alpha]_{\text{D}}^{23} = -10.0$  ( $c = 1.00$ ,  $\text{C}_6\text{H}_6$ ); IR (neat): 2956, 2935, 2886, 2862, 1730, 1467, 1382, 1304, 1252, 1148, 1081, 1007, 835, 776  $\text{cm}^{-1}$ ;  $^1\text{H}$  NMR (700 MHz,  $\text{CDCl}_3$ )  $\delta$  7.89-7.94 (m, 2H (4 diastereomers)), 7.60-7.65 (m, 1H (4 diastereomers)), 7.52-7.57 (m, 2H (4 diastereomers)), 6.43-6.48 (m, 1H (4 diastereomers)), 5.79 (m, 2H (1H of 2 diastereomers and 1H of 4 diastereomers)), 5.69 (s, 1H (1 diastereomer)), 5.68 (s, 1H (1 diastereomer)), 5.52 (dt,  $J = 15.1, 6.4$  Hz, 1H (4 diastereomers)), 5.30-5.33 (m, 1H (4 diastereomers)), 5.05 (s, 1H (1 diastereomer)), 5.01 (s, 1H (1 diastereomer)), 4.88 (s, 1H (1 diastereomer)), 4.86 (s, 1H (2 diastereomers)), 4.66 (q,  $J = 5.2$  Hz, 1H (1 diastereomer)), 4.61 (q,  $J = 5.2$  Hz, 1H (1 diastereomer)), 4.59 (q,  $J = 5.1$  Hz, 1H (1 diastereomer)), 4.49 (q,  $J = 5.1$  Hz, 1H (1 diastereomer)), 4.36-4.39 (m, 1H (2 diastereomers)), 4.25-4.29 (m, 1H (4 diastereomers)), 4.07-4.16 (m, 4H (1H of 2 diastereomers and 3H of 4 diastereomers)), 3.96-4.00 (m, 1H (2

diastereomers)), 8.84-3.94 (m, 3H (1H of 2 diastereomers and 2H of 4 diastereomers)), 3.71-3.76 (m, 1H (1 diastereomer)), 3.65-3.69 (m, 1H (1 diastereomer)), 3.52-3.62 (m, 2H (1H of 2 diastereomers + 2H of 4 diastereomers)), 3.43-3.48 (m, 1H (2 diastereomers)), 3.36-3.42 (m, 2H (1H of 2 diastereomers and 1H of 4 diastereomers)), 3.27-3.35 (m, 1H of 2 diastereomers)), 3.10-3.21 (m, 1H (2 diastereomers)), 2.40-2.44 (m, 1H (2 diastereomers)), 2.31-2.34 (m, 1H (2 diastereomers)), 2.14-2.30 (m, 1H (4 diastereomers)), 2.00-2.12 (m, 2H (4 diastereomers)), 1.76-1.99 (m, 6H (4 diastereomers)), 1.90 (s, 3H (2 diastereomers)), 1.88 (s, 3H (2 diastereomers)), 1.79 (s, 3H (4 diastereomers)), 1.777 (s, 3H (2 diastereomers)), 1.771 (s, 3H (2 diastereomers)), 1.62-1.71 (m, 3H (4 diastereomers)), 1.36-1.46 (m, 2H (4 diastereomers)), 1.26-1.33 (m, 4H (4 diastereomers)), 1.19-1.23 (m, 13H (4 diastereomers)), 1.13-1.18 (m, 4H (4 diastereomers)), 1.06-1.10 (m, 3H (4 diastereomers)), 0.98-1.01 (m, 3H), 0.95-0.98 (m, 9H (4 diastereomers)), 0.85-0.93 (m, 27H (4 diastereomers)), 0.59-0.63 (m, 6H (4 diastereomers)), 0.03-0.18 (m, 18H (4 diastereomers));  $^{13}\text{C}$  NMR (176 MHz,  $\text{CDCl}_3$ )  $\delta$  178.4, 145.56, 145.50, 145.4, 140.5, 140.2, 140.1, 139.8, 139.6, 139.0, 138.8, 135.1, 135.0, 133.3, 133.2, 133.1, 129.99, 129.97, 129.92, 129.91, 129.2, 129.1, 129.09, 129.06, 128.98, 128.94, 128.3, 125.8, 125.7, 124.79, 124.74, 124.6, 115.33, 115.30, 114.6, 114.5, 100.0, 99.5, 97.8, 97.7, 82.2, 82.19, 82.11, 80.54, 80.50, 80.3, 79.6, 79.53, 79.51, 79.2, 78.8, 78.7, 78.6, 76.28, 76.23, 76.18, 76.10, 75.8, 75.79, 75.75, 75.6, 72.4, 72.3, 72.0, 71.4, 71.1, 70.8, 70.6, 66.3, 65.6, 65.5, 62.15, 62.10, 61.1, 60.78, 60.75, 48.5, 48.4, 47.3, 47.0, 42.4, 42.1, 41.7, 41.4, 40.35, 40.32, 39.6, 39.2, 38.6, 38.1, 38.0, 35.8, 35.2, 33.1, 33.0, 32.8, 32.68, 32.63, 31.9, 29.7, 29.4, 29.3, 29.2, 28.8, 28.78, 28.71, 28.6, 27.6, 27.59, 27.54, 27.4, 27.2, 26.1, 26.0, 25.97, 25.91, 20.9, 20.7, 20.6, 20.5, 18.4, 18.3, 18.2, 18.1, 18.0, 17.9, 17.5, 17.2, 16.0, 15.9, 15.5, 15.4, 15.2, 11.7, 11.3, 6.93, 6.91, 4.9, -3.8, -4.15, -4.18, -4.2, -4.3, -4.4, -4.5, -4.6, -4.7; HRMS (ES+) calcd. for  $\text{C}_{74}\text{H}_{136}\text{O}_{12}\text{SSi}_4\text{Na}$  (M+Na) 1383.8727, found 1383.8776.

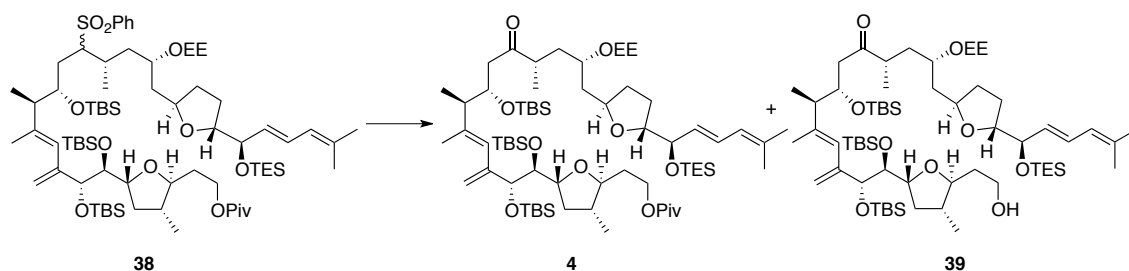

**Ketone 4 and Alcohol 39:** To a stirred solution of sulfone **38** (173.4 mg, 0.127 mmol) in THF (2.2 mL) at  $-50\text{ }^\circ\text{C}$  was added  $\text{LDA}^4$  (0.32 mL, 0.32 mmol, 1 M in THF / hexanes). After 5 min, DMPU (1.27 g, 1.2 mL, 9.88 mmol) was added and was slowly warmed to  $-25\text{ }^\circ\text{C}$  over 20 min. The reaction was cooled back down to  $-50\text{ }^\circ\text{C}$  and a solution of Davis oxaziridine<sup>9</sup> (91.4 mg, 0.350 mmol) in THF (1.0 mL) was cannulated to it. The reaction was warmed to  $-35\text{ }^\circ\text{C}$  over 20 min and then quenched with sat. aq.  $\text{NH}_4\text{Cl}$  (20 mL) and the aqueous layer was extracted with  $\text{Et}_2\text{O}$  (3 X 50 mL). The dried ( $\text{MgSO}_4$ ) extract was concentrated *in*

*vacuo* and purified by flash chromatography over silica gel, eluting with 6-20% EtOAc / hexanes, to give the ketone **4** (66.0 mg, 53.4  $\mu\text{mol}$ , 42%) and alcohol **39** (33.6 mg, 29.2  $\mu\text{mol}$ , 23%) as colorless oil along with the recovered sulfone **38** (49.9 mg, 36.6  $\mu\text{mol}$ , 29%). Ketone **4**:  $[\alpha]_{\text{D}}^{23} = +30.0$  ( $c = 1.03$ ,  $\text{C}_6\text{H}_6$ ); IR (neat): 2956, 2932, 2859, 1731, 1719, 1461, 1377, 1251, 1078, 835, 776  $\text{cm}^{-1}$ ;  $^1\text{H}$  NMR (700 MHz,  $\text{CDCl}_3$ )  $\delta$  6.43-6.48 (m, 1H (2 diastereomers)), 5.83 (d,  $J = 11.0$  Hz, 1H (2 diastereomers)), 5.59 (s, 1H (2 diastereomers)), 5.53 (ddd,  $J = 15.1, 6.0, 3.2$  Hz, 1H (2 diastereomers)), 5.32 (s, 1H (2 diastereomers)), 4.96 (s, 1H (2 diastereomers)), 4.65-4.68 (m, 1H (2 diastereomers)), 4.35-4.37 (m, 1H (2 diastereomers)), 4.24-4.28 (m, 1H (2 diastereomers)), 4.10-4.16 (m, 2H (2 diastereomers)), 4.08 (s, 1H (2 diastereomers)), 3.89-3.97 (m, 3H (2 diastereomers)), 3.74-3.78 (m, 1H (1 diastereomer)), 3.57-3.67 (m, 2H (1H of 1 diastereomer and 1H of 2 diastereomers)), 3.45-3.53 (m, 2H (2 diastereomers)), 3.33 (dt,  $J = 9.2, 2.7$  Hz, 1H (2 diastereomers)), 2.77 (qd,  $J = 7.4, 4.3$  Hz, 1H (1 diastereomer)), 2.57-2.66 (m, 2H (1H of 1 diastereomer and 1H of 2 diastereomers)), 2.54 (dd,  $J = 5.6, 3.5$  Hz, 1H (1 diastereomer)), 2.51 (dd,  $J = 5.6, 3.5$  Hz, 1H (1 diastereomer)), 2.36-2.41 (m, 1H (2 diastereomers)), 2.03-2.07 (m, 1H (2 diastereomers)), 1.94-2.01 (m, 2H (2 diastereomers)), 1.80-1.91 (m, 3H (2 diastereomers)), 1.81 (s, 3H (2 diastereomers)), 1.79 (s, 3H (2 diastereomers)), 1.77 (s, 3H (2 diastereomers)), 1.63-1.71 (m, 2H (2 diastereomers)), 1.48-1.52 (m, 1H (2 diastereomers)), 1.37-1.46 (m, 2H (2 diastereomers)), 1.26-1.30 (m, 4H (2 diastereomers)), 1.19-1.22 (m, 12H (2 diastereomers)), 1.08 (d,  $J = 7.0$  Hz, 3H (2 diastereomers)), 1.05 (d,  $J = 6.9$  Hz, 3H (1 diastereomer)), 1.04 (d,  $J = 6.9$  Hz, 3H (1 diastereomer)), 0.98 (d,  $J = 6.4$  Hz, 3H (2 diastereomers)), 0.97 (t,  $J = 7.9$  Hz, 3H (2 diastereomers)), 0.907 (s, 9H (2 diastereomers)), 0.905 (s, 9H (1 diastereomer)), 0.904 (s, 9H (1 diastereomer)), 0.892 (s, 9H (1 diastereomer)), 0.890 (s, 9H (1 diastereomer)), 0.61 (q,  $J = 7.9$  Hz, 6H (2 diastereomers)), 0.113 (s, 3H (1 diastereomer)), 0.111 (s, 3H (1 diastereomer)), 0.08 (s, 3H (2 diastereomers)), 0.06 (s, 3H (2 diastereomers)), 0.04 (s, 3H (1 diastereomer)), 0.03 (s, 3H (1 diastereomer)), 0.02 (s, 3H (2 diastereomers)), 0.007 (s, 3H (1 diastereomer)), 0.004 (s, 3H (1 diastereomer));  $^{13}\text{C}$  NMR (176 MHz,  $\text{CDCl}_3$ )  $\delta$  213.1, 212.7, 178.4, 145.1, 140.93, 140.91, 135.16, 135.13, 129.87, 129.83, 127.4, 125.4, 124.6, 115.04, 115.00, 99.8, 98.8, 98.4, 82.19, 82.14, 80.45, 80.43, 79.4, 78.8, 78.5, 76.1, 76.0, 75.6, 72.5, 71.3, 70.47, 70.40, 62.1, 61.3, 61.1, 47.9, 47.8, 45.5, 45.4, 43.0, 42.8, 41.8, 41.2, 40.3, 38.6, 38.0, 37.0, 36.9, 33.1, 32.9, 32.7, 29.7, 27.4, 27.2, 26.1, 26.0, 25.97, 25.90, 20.8, 20.7, 18.4, 18.36, 18.30, 17.9, 17.1, 17.0, 16.1, 16.0, 15.7, 15.4, 15.3, 14.1, 14.0, 6.9, 4.9, -4.23, -4.26, -4.44, -4.46, -4.7, 4.8; HRMS (ES+) calcd. for  $\text{C}_{68}\text{H}_{130}\text{O}_{11}\text{Si}_4\text{Na}$  (M+Na) 1257.8588, found 1257.8564.

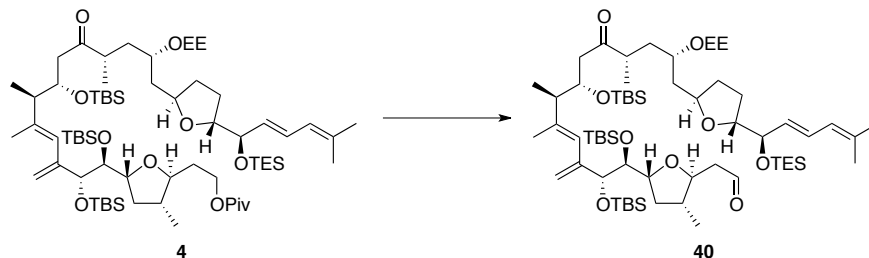

**Aldehyde 40:** To a stirred solution of pivaloyl ester **4** (46.2 mg, 37.3  $\mu\text{mol}$ ) in  $\text{Et}_2\text{O}$  (2.7 mL) at  $-20\text{ }^\circ\text{C}$  was added  $\text{LiAlH}_4$  (3.6 mg, 93.4  $\mu\text{mol}$ ) in one portion. After 25 min, the reaction was quenched with  $\text{H}_2\text{O}$  (10 drops) and the organic layer was decanted. The solid formed was washed with  $\text{Et}_2\text{O}$  (3 X 20 mL). The dried ( $\text{MgSO}_4$ ) extract was concentrated *in vacuo* to give the crude diol.

To a stirred solution of oxalyl chloride (23.7 mg, 16.5  $\mu\text{L}$ , 0.187 mmol) in  $\text{CH}_2\text{Cl}_2$  (1.0 mL) at  $-78\text{ }^\circ\text{C}$  was cannulated a solution of DMSO (29.2 mg, 27  $\mu\text{L}$ , 0.374 mmol) in  $\text{CH}_2\text{Cl}_2$  (0.50 mL). After 20 min, a solution of the crude diol in  $\text{CH}_2\text{Cl}_2$  (1.2 mL + 2 X 0.25 mL wash) was cannulated to it. After 45 min,  $\text{Et}_3\text{N}$  (37.8 mg, 53  $\mu\text{L}$ , 0.374 mmol) was added. After 10 min, the reaction was quenched with  $\text{H}_2\text{O}$  (10 mL) and the aqueous layer was extracted with  $\text{CH}_2\text{Cl}_2$  (3 X 20 mL). The dried ( $\text{MgSO}_4$ ) extract was concentrated *in vacuo* and purified by flash chromatography over silica gel, eluting with 5-15%  $\text{EtOAc}$  / hexanes, to give aldehyde **40** (35.6 mg, 30.9  $\mu\text{mol}$ , 83%) as colorless oil:  $[\alpha]_{\text{D}}^{23} = +14.9$  ( $c = 0.35$ ,  $\text{C}_6\text{H}_6$ ); IR: (neat) 2959, 2927, 2857, 1732, 1710, 1662, 1635, 1465, 1380, 1078, 835, 781  $\text{cm}^{-1}$ ;  $^1\text{H}$  NMR (700 MHz,  $\text{CDCl}_3$ )  $\delta$  9.82 (dd,  $J = 2.9, 2.3$  Hz, 1H (2 diastereomers)), 6.44-6.48 (m, 1H (2 diastereomers)), 5.83 (d,  $J = 11.0$  Hz, 1H (2 diastereomers)), 5.60 (s, 1H (2 diastereomers)), 5.53 (ddd,  $J = 15.1, 6.0, 3.2$  Hz, 1H (2 diastereomers)), 5.32 (t,  $J = 1.7$  Hz, 1H (2 diastereomers)), 4.97 (s, 1H (2 diastereomers)), 4.68 (q,  $J = 5.2$  Hz, 1H (1 diastereomer)), 4.66 (q,  $J = 5.2$  Hz, 1H (1 diastereomer)), 4.37-4.39 (m, 1H (2 diastereomers)), 4.16 (t,  $J = 5.9$  Hz, 1H (2 diastereomers)), 4.08 (s, 1H (2 diastereomers)), 3.99-4.02 (m, 1H (2 diastereomers)), 3.89-3.97 (m, 1H (2 diastereomers)), 3.75-3.78 (m, 1H (1 diastereomer)), 3.73 (td,  $J = 3.5$  Hz, 1H (2 diastereomers)), 3.58-3.67 (m, 2H (1H of 1 diastereomer and 1H of 2 diastereomers)), 3.54 (dt,  $J = 7.1, 2.5$  Hz, 1H (2 diastereomers)), 3.45-3.52 (m, 1H (2 diastereomers)), 2.76-2.81 (m, 1H (1 diastereomer)), 2.59-2.68 (m, 2H (1H of 1 diastereomer and 1H of 2 diastereomers)), 2.57 (dd,  $J = 3.4, 2.3$  Hz, 1H (1 diastereomer)), 2.55 (dd,  $J = 3.4, 2.3$  Hz, 1H (1 diastereomer)), 2.47-2.52 (m, 2H (2 diastereomers)), 2.38-2.42 (m, 1H (2 diastereomers)), 2.06-2.10 (m, 1H (2 diastereomers)), 1.95-2.01 (m, 2H (1H of 1 diastereomer and 1H of 2 diastereomers)), 1.84-1.90 (m, 3H (1H of 1 diastereomer and 2H of 2 diastereomers)), 1.83 (s, 3H (2 diastereomers)), 1.79 (s, 3H (2 diastereomers)), 1.77 (s, 3H (2 diastereomers)), 1.65-1.72 (m, 1H (2 diastereomers)), 1.48-1.53 (m, 1H (2 diastereomers)), 1.38-1.46 (m, 2H (2 diastereomers)), 1.296 (d,  $J = 5.2$  Hz, 3H (1 diastereomer)), 1.291 (d,  $J = 5.2$  Hz, 3H (1 diastereomer)), 1.22 (t,  $J = 7.0$  Hz, 3H (1 diastereomer)), 1.21 (t,  $J = 7.0$  Hz, 3H (1 diastereomer)), 1.09 (d,  $J = 7.0$  Hz, 3H (2 diastereomers)), 1.06 (d,  $J = 6.9$  Hz, 3H (1 diastereomer)), 1.05 (d,  $J = 6.9$  Hz, 3H (1 diastereomer)), 1.02 (d,  $J$

= 6.5 Hz, 3H (2 diastereomers)), 0.97 (t,  $J = 7.9$  Hz, 3H (2 diastereomers)), 0.913 (s, 9H (1 diastereomer)), 0.912 (s, 9H (1 diastereomer)), 0.897 (s, 9H (2 diastereomers)), 0.896 (s, 9H (2 diastereomers)), 0.62 (q,  $J = 7.9$  Hz, 6H (2 diastereomers)), 0.12 (s, 3H (1 diastereomer)), 0.11 (s, 3H (1 diastereomer)), 0.08 (s, 3H (2 diastereomers)), 0.04 (s, 6H (2 diastereomers)), 0.028 (s, 3H (2 diastereomers)), 0.025 (s, 3H (2 diastereomers)), 0.01 (s, 3H (1 diastereomer)), 0.007 (s, 3H (1 diastereomer));  $^{13}\text{C}$  NMR (176 MHz,  $\text{CDCl}_3$ )  $\delta$  213.0, 212.6, 202.1, 145.0, 141.1, 141.0, 135.1, 135.0, 129.9, 129.8, 127.5, 127.4, 125.2, 124.6, 115.1, 115.0, 99.8, 98.4, 82.2, 82.1, 79.9, 79.8, 79.3, 78.66, 78.60, 76.1, 76.0, 75.6, 72.6, 71.3, 70.4, 70.3, 61.3, 61.1, 48.0, 47.9, 47.6, 45.4, 45.3, 43.1, 42.8, 41.8, 41.2, 40.6, 37.5, 37.1, 36.9, 32.9, 32.7, 29.7, 27.4, 26.1, 26.0, 25.95, 25.91, 25.89, 20.8, 20.7, 18.4, 18.3, 18.2, 17.9, 17.26, 17.24, 16.1, 15.7, 15.6, 15.4, 15.3, 14.0, 13.9, 6.9, 4.9, -4.1, -4.2, -4.45, -4.46, -4.7, -4.8; HRMS (ES+) calcd. for  $\text{C}_{63}\text{H}_{120}\text{O}_{10}\text{Si}_4\text{Na}$  ( $M+\text{Na}$ ) 1171.7856, found 1171.7769.

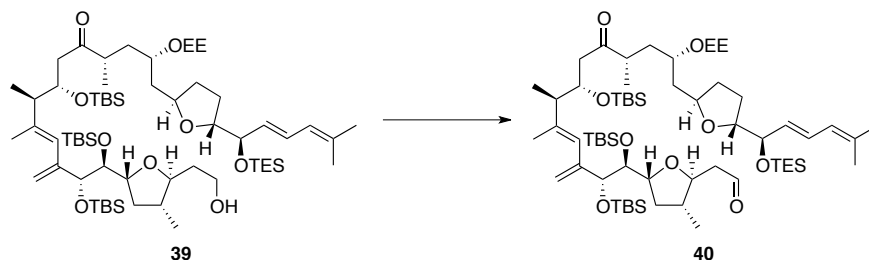

**Aldehyde 40:** To a stirred solution of oxalyl chloride (10.4 mg, 7.2  $\mu\text{L}$ , 82.4  $\mu\text{mol}$ ) in  $\text{CH}_2\text{Cl}_2$  (0.50 mL) at  $-78$   $^\circ\text{C}$  was cannulated a solution of DMSO (12.9 mg, 11.8  $\mu\text{L}$ , 0.165 mmol) in  $\text{CH}_2\text{Cl}_2$  (0.25 mL). After 15 min, a solution of alcohol **39** (19.0 mg, 16.5  $\mu\text{mol}$ ) in  $\text{CH}_2\text{Cl}_2$  (0.50 mL + 2 X 0.10 mL wash) was cannulated to it. After 45 min,  $\text{Et}_3\text{N}$  (16.7 mg, 24  $\mu\text{L}$ , 0.165 mmol) was added. After 10 min, the reaction was quenched with  $\text{H}_2\text{O}$  (5 mL) and the aqueous layer was extracted with  $\text{CH}_2\text{Cl}_2$  (3 X 15 mL). The dried ( $\text{MgSO}_4$ ) extract was concentrated *in vacuo* and purified by flash chromatography over silica gel, eluting with 5-15%  $\text{EtOAc}$  / hexanes, to give aldehyde **40** (15.8 mg, 13.7  $\mu\text{mol}$ , 83%) as colorless oil.

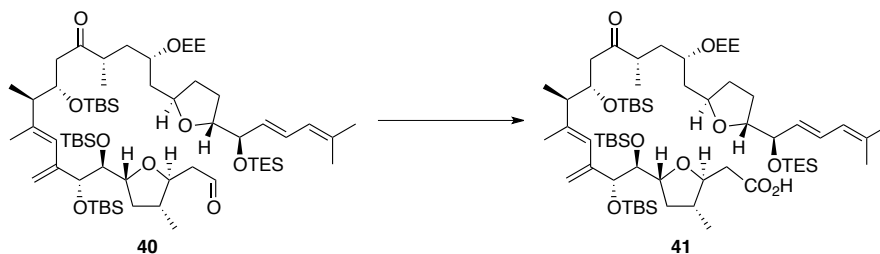

**Carboxylic Acid 41:** To a stirred solution of aldehyde **40** (35.6 mg, 30.9  $\mu\text{mol}$ ) in  $t\text{-BuOH} / \text{H}_2\text{O}$  (1:1, 3.0 mL) at  $0$   $^\circ\text{C}$  were sequentially added 2-methyl-2-butene (108 mg, 0.16 mL, 1.54 mmol),  $\text{NaH}_2\text{PO}_4 \cdot \text{H}_2\text{O}$  (42.7 mg, 0.309 mmol) and  $\text{NaClO}_2$  (14.1 mg, 0.154 mmol). After 15 min, the reaction was warmed to rt. After another 1.5 h, the reaction was diluted with  $\text{H}_2\text{O}$  (7.5 mL) and the aqueous layer

was extracted with EtOAc / Et<sub>2</sub>O (1:1, 3 X 20 mL). The dried (MgSO<sub>4</sub>) extract was concentrated *in vacuo* and purified by flash chromatography over silica gel, eluting with 10-30 % EtOAc / hexanes, to give carboxylic acid **41** (30.7 mg, 26.3 μmol, 85%) as light yellow oil: [α]<sub>D</sub><sup>23</sup> = +23.4 (*c* = 0.87, C<sub>6</sub>H<sub>6</sub>); IR (neat): 3385, 2959, 2930, 2886, 2862, 1713, 1465, 1382, 1252, 1084, 1005, 835, 776 cm<sup>-1</sup>; <sup>1</sup>H NMR (700 MHz, CDCl<sub>3</sub>) δ 10.00 (bs, 1H (2 diastereomers)), 6.43-6.48 (m, 1H (2 diastereomers)), 5.83 (d, *J* = 10.9 Hz, 1H (2 diastereomers)), 5.60 (s, 1H (1 diastereomer)), 5.59 (s, 1H (1 diastereomer)), 5.53 (ddd, *J* = 15.1, 6.0, 2.8 Hz, 1H (2 diastereomers)), 5.36 (t, *J* = 1.8 Hz, 1H (1 diastereomer)), 5.35 (t, *J* = 1.7 Hz, 1H (1 diastereomer)), 5.00 (s, 1H (2 diastereomers)), 4.68 (q, *J* = 5.2 Hz, 1H (1 diastereomer)), 4.66 (q, *J* = 5.2 Hz, 1H (1 diastereomer)), 4.41-4.44 (m, 1H (1 diastereomer)), 4.36-4.38 (m, 1H (1 diastereomer)), 4.17 (t, *J* = 5.4 Hz, 1H (1 diastereomer)), 4.16 (t, *J* = 5.3 Hz, 1H (1 diastereomer)), 4.10-4.13 (m, 2H (2 diastereomers)), 3.89-3.98 (m, 2H (2 diastereomers)), 3.76-3.80 (m, 1H (1 diastereomer)), 3.61-3.68 (m, 2H (2 diastereomers)), 3.52-3.60 (m, 2H (2 diastereomers)), 3.46-3.50 (m, 1H (1 diastereomer)), 2.78-2.83 (m, 1H (1 diastereomer)), 2.58-2.70 (m, 3H (1H of 1 diastereomer and 2H of 2 diastereomers)), 2.39-2.54 (m, 3H (2 diastereomers)), 2.10-2.14 (m, 1H (2 diastereomers)), 1.94-2.01 (m, 2H (2 diastereomers)), 1.81-1.93 (m, 3H (2 diastereomers)), 1.83 (d, *J* = 1.0 Hz, 3H (1 diastereomer)), 1.82 (d, *J* = 1.0 Hz, 3H (1 diastereomer)), 1.79 (s, 3H (2 diastereomers)), 1.77 (s, 3H (2 diastereomers)), 1.66-1.73 (m, 1H (2 diastereomers)), 1.48-1.53 (m, 1H (2 diastereomers)), 1.36-1.47 (m, 2H (2 diastereomers)), 1.27-1.34 (m, 4H (2 diastereomers)), 1.22 (t, *J* = 7.0 Hz, 3H (1 diastereomer)), 1.21 (t, *J* = 7.0 Hz, 3H (1 diastereomer)), 1.104 (d, *J* = 7.0 Hz, 3H (1 diastereomer)), 1.102 (d, *J* = 7.0 Hz, 3H (1 diastereomer)), 1.05 (d, *J* = 6.9 Hz, 3H (2 diastereomers)), 1.03 (d, *J* = 6.5 Hz, 3H (1 diastereomer)), 1.01 (d, *J* = 6.5 Hz, 3H (1 diastereomer)), 0.97 (t, *J* = 7.9 Hz, 3H (2 diastereomers)), 0.89-0.92 (m, 27H (4 diastereomers)), 0.62 (q, *J* = 7.9 Hz, 6H (2 diastereomers)), 0.01-0.12 (m, 18H); <sup>13</sup>C NMR (176 MHz, CDCl<sub>3</sub>) δ 213.0, 212.6, 172.0, 144.9, 141.5, 141.4, 135.16, 135.10, 129.88, 129.82, 127.5, 125.1, 124.8, 124.6, 115.1, 114.7, 99.7, 98.5, 82.2, 82.1, 80.2, 80.16, 80.11, 78.9, 78.7, 78.0, 76.17, 76.12, 75.6, 75.5, 72.5, 71.2, 70.4, 70.2, 61.7, 61.1, 47.8, 47.7, 45.4, 45.1, 43.1, 42.7, 41.8, 41.2, 39.8, 37.9, 37.7, 37.58, 37.55, 37.1, 36.9, 32.9, 32.6, 29.7, 27.4, 26.09, 26.01, 25.9, 25.8, 20.8, 20.7, 18.3, 18.2, 17.9, 17.2, 17.1, 16.1, 15.69, 15.65, 15.5, 15.39, 15.34, 14.1, 13.8, 6.9, 4.9, -3.9, -4.40, -4.43, -4.47, -4.71, -4.74, -4.78; HRMS (ES+) calcd. for C<sub>63</sub>H<sub>120</sub>O<sub>11</sub>Si<sub>4</sub>Na (M+Na) 1187.7805, found 1187.7740.

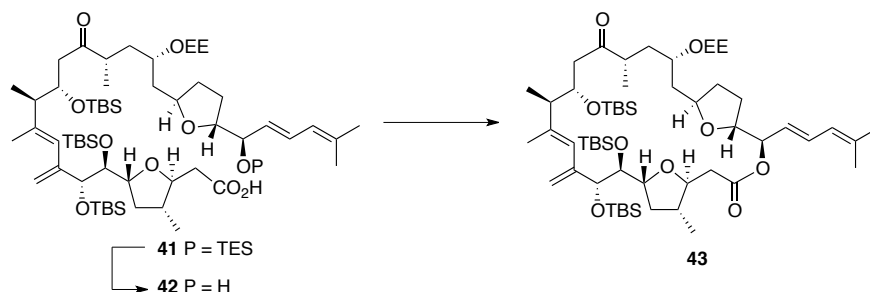

**Macrolactone 43:** To a stirred solution of carboxylic acid **41** (30.7 mg, 26.3  $\mu\text{mol}$ ) in dry MeOH (2.5 mL) at 0 °C was added methanolic PPTS solution (50  $\mu\text{L}$ ).<sup>10</sup> After 15 min, the reaction was warmed to rt. After another 35 min, the reaction was quenched with sat. aq.  $\text{NaHCO}_3$  (8 mL) and the aqueous layer was extracted with EtOAc (3 X 20 mL). The dried ( $\text{MgSO}_4$ ) extract was concentrated *in vacuo* to give the intermediate crude seco acid **42**.

To a stirred solution of crude seco acid **42** in THF (1.0 mL) at 0 °C were added  $\text{Et}_3\text{N}$  (4.7 mg, 6.6  $\mu\text{L}$ , 46.7  $\mu\text{mol}$ ) followed by 2,4,6-trichlorobenzoyl chloride (7.6 mg, 4.9  $\mu\text{L}$ , 31.1  $\mu\text{mol}$ ). After 45 min, the reaction was diluted with toluene (1.8 mL). In a separate flask, a solution of DMAP (5.7 mg, 46.7  $\mu\text{mol}$ ) in toluene (7.0 mL) was warmed to 70 °C and the solution of mixed acid anhydride was added dropwise over 6 h to it. After another 30 min, the reaction was cooled down to rt and was directly loaded onto column and purified by flash chromatography over silica gel, eluting with 5-15% EtOAc / hexanes, to give macrolactone **43** (17.7 mg, 17.1  $\mu\text{mol}$ , 65%) as colorless oil:  $[\alpha]_D^{23} = +2.0$  ( $c = 1.00$ ,  $\text{CHCl}_3$ ); IR: (neat) 2959, 2930, 2859, 1745, 1708, 1465, 1384, 1255, 1090, 837, 778  $\text{cm}^{-1}$ ;  $^1\text{H}$  NMR (700 MHz,  $\text{CDCl}_3$ )  $\delta$  6.52-6.56 (m, 1H (2 diastereomers)), 6.17 (s, 1H (1 diastereomer)), 6.16 (s, 1H (1 diastereomer)), 5.78 (d,  $J = 11.0$  Hz, 1H (2 diastereomers)), 5.35-5.38 (m, 1H (2 diastereomers)), 5.00 (s, 1H (1 diastereomer)), 4.98 (s, 1H (1 diastereomer)), 4.95 (t,  $J = 8.3$  Hz, 1H (2 diastereomers)), 4.91 (s, 1H (1 diastereomer)), 4.70 (q,  $J = 5.2$  Hz, 1H (1 diastereomer)), 4.67 (q,  $J = 5.2$  Hz, 1H (1 diastereomer)), 4.20 (s, 1H (1 diastereomer)), 4.19 (s, 1H (1 diastereomer)), 3.96-4.05 (m, 2H (2 diastereomers)), 3.89-3.94 (m, 2H (2 diastereomers)), 3.54-3.76 (m, 4H (2 diastereomers)), 2.95-3.05 (m, 1H (2 diastereomers)), 2.71-2.75 (m, 1H (1 diastereomer)), 2.59-2.63 (m, 1H (1 diastereomer)), 2.45-2.51 (m, 2H (2 diastereomers)), 2.27-2.38 (m, 2H (2 diastereomers)), 2.11 (br s, 1H (2 diastereomers)), 2.04-2.07 (m, 2H (1H of 1 diastereomer and 1H of 2 diastereomers)), 1.91-1.99 (m, 2H (2 diastereomers)), 1.85-1.89 (m, 1H (1 diastereomer)), 1.70-1.81 (m, 10H (2 diastereomers)), 1.49-1.60 (m, 4H (2 diastereomers)), 1.28-1.34 (m, 5H (2 diastereomers)), 1.23 (t,  $J = 7.0$  Hz, 3H (2 diastereomers)), 1.08-1.13 (m, 6H (2 diastereomers)), 1.03-1.05 (m, 3H (2 diastereomers)), 0.91 (s, 18H (2 diastereomers)), 0.85 (s, 9H (2 diastereomers)), 0.02-0.11 (m, 18H (2 diastereomers));  $^{13}\text{C}$  NMR (176 MHz,  $\text{CDCl}_3$ )  $\delta$  212.0, 211.6, 170.49, 170.45, 146.4, 146.3, 140.83, 140.80, 137.6, 137.5, 131.26, 131.22, 129.0, 125.05, 125.01, 124.2, 114.36, 114.33, 99.7, 97.8, 81.8, 80.0, 79.2, 79.1, 78.8, 78.20, 78.17, 77.7, 77.6, 75.5, 75.2, 71.7, 71.6, 70.2, 62.2, 61.7,

56.0, 47.2, 47.1, 46.2, 42.5, 41.8, 41.7, 40.78, 40.74, 39.88, 39.80, 38.79, 38.73, 34.7, 34.5, 32.7, 31.9, 30.3, 30.2, 29.4, 29.2, 29.0, 26.5, 26.1, 25.9, 25.8, 22.7, 21.2, 21.0, 18.7, 18.58, 18.52, 17.9, 16.6, 16.4, 16.3, 16.2, 16.0, 15.6, 15.2, 14.1, -3.9, -4.0, -4.4, -4.5, -4.6, -4.7, -4.8, -5.4, -5.5; HRMS (ES+) calcd. for  $C_{57}H_{104}O_{10}Si_3Na$  (M+Na) 1055.6835, found 1055.6757.

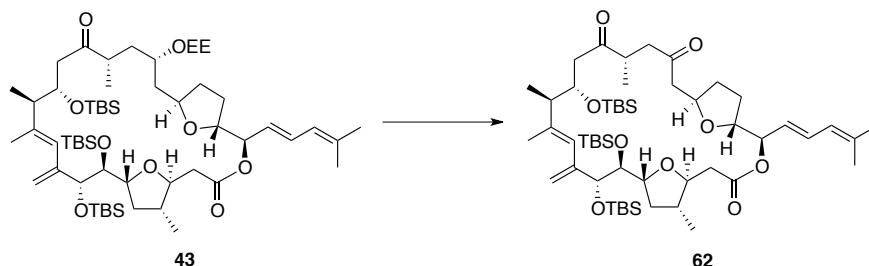

**Diketone 62:** The macro lactone **43** (6.8 mg, 6.57  $\mu\text{mol}$ ) in THF / AcOH /  $H_2O$  (0.78 mL, 4:4:1) was stirred at rt. After 20 h, the reaction was quenched with sat. aq.  $NaHCO_3$  (5 mL) and the aqueous layer was extracted with EtOAc /  $Et_2O$  (2:1, 3 X 15 mL). The dried ( $MgSO_4$ ) extract was concentrated *in vacuo* to give the crude alcohol.

To a stirred solution of crude alcohol in  $CH_2Cl_2$  (1.0 mL) at 0  $^\circ\text{C}$  were added pyridine (10.4 mg, 10.7  $\mu\text{L}$ , 0.131 mmol) followed by Dess-Martin periodinane (16.7 mg, 39.5  $\mu\text{mol}$ ). After 15 min, the reaction was warmed to rt. After another 2.45 h, the reaction was quenched with sat. aq.  $NaHCO_3$  (mL) and the aqueous layer was extracted with  $Et_2O$  (3 X 15 mL). The dried ( $MgSO_4$ ) extract was concentrated *in vacuo* and purified by flash chromatography over silica gel, eluting with 5-15% EtOAc / hexanes, to give diketone **62** (3.9 mg, 4.06  $\mu\text{mol}$ , 62%) as colorless oil:  $[\alpha]_D^{23} = +0.92$  ( $c = 0.55$ ,  $CHCl_3$ ); IR: (neat) 2959, 2929, 2860, 1740, 1708, 1662, 1632, 1467, 1387, 1258, 1098, 1045, 838, 781  $cm^{-1}$ ;  $^1H$  NMR (700 MHz,  $CDCl_3$ , **Note: NMR analysis indicated that compound 62 exists as a mixture of conformational isomers**)  $\delta$  6.54 (dd,  $J = 15.2, 11.0$  Hz, 1H), 6.01 (br s, 0.5H), 5.77 (br d,  $J = 11.0$  Hz, 1H), 5.57-5.68 (br m, 0.2H), 5.36-5.47 (br m, 1.3H), 5.12 (br s, 1H), 5.05 (br s, 1H), 4.95 (br s, 1H), 4.42-4.61 (br m, 1H), 4.25 (br s, 1H), 3.91-4.06 (br m, 3H), 3.71 (br s, 0.7H), 3.55 (br s, 1.3H), 2.98 (br s 1H), 2.84-2.87 (br m, 1H), 2.73 (br s, 1H), 2.60 (dd,  $J = 14.3, 3.3$  Hz, 1H), 2.43 (br s, 4H), 2.17 (br s, 1H), 2.00 (br s, 2H), 1.86-1.94 (m, 2H), 1.79 (br s, 3H), 1.78 (s, 3H), 1.77 (s, 3H) 1.62-1.65 (m, 1H), 1.52-1.58 (m, 2H), 1.22-1.27 (m, 1H), 1.14 (br s, 3H), 1.11 (d,  $J = 7.0$  Hz, 3H), 1.03 (br s, 3H), 0.90 (s, 27H), 0.03-0.09 (m, 18H);  $^{13}C$  NMR (176 MHz,  $CDCl_3$ )  $\delta$  211.0, 207.5, 170.5, 146.3, 140.7, 140.3, 137.87, 137.80, 131.6, 128.6, 124.7, 124.2, 114.7, 113.7, 81.4, 80.0, 79.5, 78.7, 75.2, 71.6, 50.4, 46.7, 46.3, 42.8, 41.1, 40.6, 39.8, 38.3, 36.6, 32.2, 28.5, 26.4, 26.06, 26.01, 25.8, 18.5, 18.4, 17.7, 16.5, 15.9, 15.6, -4.1, -4.6, -4.8; HRMS (ES+) calcd. for  $C_{53}H_{94}O_9Si_3Na$  (M+Na) 981.6103, found 981.6069.



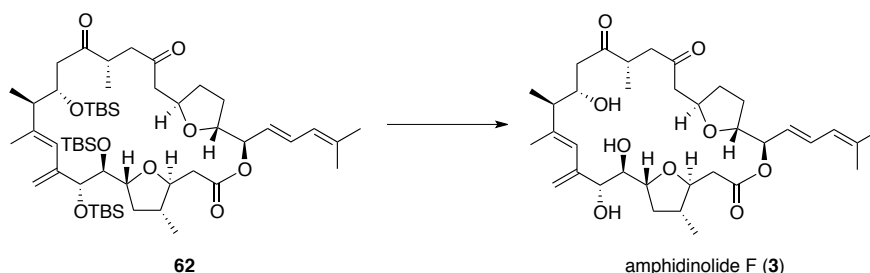

**Amphidinolide F (3):** To a solution of tri-TBS ether **62** (3.9 mg, 4.06  $\mu\text{mol}$ ) in  $\text{CH}_3\text{CN}$  (0.60 mL) at rt was added  $\text{Et}_3\text{N}\cdot 3\text{HF}$  (0.48 mL) followed by  $\text{Et}_3\text{N}$  (0.41 mL). After 7 d, the reaction was diluted with  $\text{EtOAc}$  (15 mL) and poured into sat. aq. solution of  $\text{NaHCO}_3$  (7 mL) and the aqueous layer was extracted with  $\text{EtOAc}$  (3 X 15 mL). The dried ( $\text{MgSO}_4$ ) extract was concentrated *in vacuo* and purified by flash chromatography over silica gel, eluting with 1-5%  $\text{MeOH}$  /  $\text{EtOAc}$ , to give amphidinolide F (**3**) (1.4 mg, 2.27  $\mu\text{mol}$ , 56%) as pale yellow amorphous solid:  $[\alpha]_{\text{D}}^{23} = -49.0$  ( $c = 0.10$ ,  $\text{CHCl}_3$ ), {lit.<sup>11</sup>  $[\alpha]_{\text{D}}^{30} = -57$  ( $c = 0.10$ ,  $\text{CHCl}_3$ )};  $^1\text{H NMR}$  (700 MHz,  $\text{CDCl}_3$ , **Note: NMR data is concentration dependent, data reported below is for 1.4 mg of 3 in 0.18 mL of  $\text{CDCl}_3$** )  $\delta$  6.55 (dd,  $J = 14.9$ , 11.0 Hz, 1H), 6.02 (br s, 1H), 5.79 (br d,  $J = 11.0$  Hz, 1H), 5.37 (dd,  $J = 15.0$ , 8.4 Hz, 1H), 5.22 (t,  $J = 8.2$  Hz, 1H), 5.20 (d,  $J = 1.3$  Hz, 1H), 4.98 (br s, 1H), 4.35-4.39 (m, 1H), 4.15 (br s, 1H), 4.11 (dd,  $J = 14.9$ , 7.3 Hz, 1H), 4.01 (br s, 1H), 3.97 (br t,  $J = 9.0$  Hz, 1H), 3.85-3.88 (m, 1H), 3.84 (dt,  $J = 9.5$ , 2.6 Hz, 1H), 3.80 (br t,  $J = 7.8$  Hz, 1H), 3.56 (br s, 2H), 3.13-3.18 (m, 1H), 3.08 (dd,  $J = 17.5$ , 8.9 Hz, 1H), 2.77 (dd,  $J = 15.2$ , 9.1 Hz, 1H), 2.74 (dd,  $J = 15.8$ , 8.4 Hz, 1H), 2.49-2.58 (m, 4H), 2.34-2.38 (m, 1H), 2.28-2.32 (m, 1H), 2.09-2.14 (m, 2H), 1.94-1.98 (m, 1H), 1.81-1.86 (m, 1H), 1.79 (s, 3H), 1.78 (s, 3H), 1.74 (d,  $J = 1.1$  Hz, 3H), 1.47-1.54 (m, 2H), 1.36-1.40 (m, 1H), 1.12 (d,  $J = 7.2$  Hz, 3H), 1.06 (d,  $J = 6.9$  Hz, 3H), 1.02 (d,  $J = 6.5$  Hz, 3H);  $^{13}\text{C NMR}$  (176 MHz,  $\text{CDCl}_3$ )  $\delta$  213.77, 207.77, 171.22, 144.45, 140.04, 138.29, 132.06, 124.52, 124.19, 124.04, 116.11, 81.45, 79.90, 78.94, 77.84, 76.51(2C), 75.01, 70.62, 49.38, 48.57, 46.03, 45.55, 42.79, 39.79, 38.70, 36.77, 31.98, 28.43, 26.08, 18.51, 16.24, 15.53, 15.40, 13.77; HRMS (ES+) calcd. for  $\text{C}_{35}\text{H}_{53}\text{O}_9$  (M+H) 617.3690, found 617.3685.

## References

1. (a) O. Flögel, M. G. O. Amombo, H.-U. Reißig, G. Zahn, I. Brüdgam, H. Hartl, *Chem. Eur. J.* **2003**, *9*, 1405-1415. (b) B. Herradon, *Tetrahedron: Asymmetry* **1991**, *2*, 191-194.
2. (a) S. Ohira, *Synth. Commun.* **1989**, *19*, 561-564. (b) S. Müller, B. Liepold, G. J. Roth, J. Bestmann, *Synlett* **1996**, 521-522. See also: (c) W. R. F. Goundry, J. E. Baldwin, V. Lee, *Tetrahedron* **2003**, *59*, 1719-1729. (d) M. Kitamura, M. Tokynaga, R. Noyori, *J. Am. Chem. Soc.* **1995**, *117*, 2931-2932.
3. (a) D. J. Dixon, S. V. Ley, D. A. Longbottom, *Org. Synth.* **2003**, *80*, 129-132. (b) Q. Wang, H.-X. Wei, M. Schlosser, *Eur. J. Org. Chem.* **1999**, 3263-3268.
4. **Preparation of LDA Solution:** To a solution of diisopropylamine (1 equiv.) in THF (0.46 mL per mmol) at -78°C was added n-BuLi (1 equiv., 2.5 M in hexanes). After 5 min, the white slurry was warmed to -10°C and stirred for an additional 15 min.
5. **Preparation of HF·pyr Solution:** The stock solution was prepared by mixing HF·pyr (1.0 mL, 70% HF in pyridine), pyridine (2.0 mL) and THF (5.0 mL).
6. S. Mahapatra, R. G. Carter, *Org. Biomol. Chem.* **2009**, *7*, 4582-4585.
7. I. Ohtani, T. Kusumi, Y. Kashman, H. Kakisawa, *J. Am. Chem. Soc.* **1991**, *113*, 4092-4096.
8. (a) J. D. White, M. Kawaski, *J. Org. Chem.* **1992**, *57*, 5292-5300. (b) B. G. Vong, S. Abraham, A. X. Xiang, E. A. Theodorakis, *Org. Lett.* **2003**, *5*, 1617-1620.
9. F. A. Davis, O. D. Stringer, *J. Org. Chem.* **1982**, *47*, 1774-1775.
10. **Preparation of PPTS Solution:** The stock solution was prepared by mixing PPTS (20.0 mg) in MeOH (3.0 mL).
11. J. Kobayashi, M. Tsuda, M. Ishibashi, H. Shigemori, T. Yamasu, H. Hirota, T. Sasaki, *J. Antibiot.* **1991**, *44*, 1259-1261.

# **First Enantioselective Total Synthesis of Amphidinolide F**

Subham Mahapatra and Rich G. Carter\*

*Department of Chemistry, Oregon State University, Corvallis, OR 97331*

---

**Electronic Supplementary Information: NMR Spectra**

---

# First Enantioselective Total Synthesis of Amphidinolide F

## Table of Contents

| <b>Compound #</b> | <b>Page Number</b> |
|-------------------|--------------------|
| <b>10</b>         | S3                 |
| <b>11</b>         | S5                 |
| <b>13</b>         | S7                 |
| <b>14</b>         | S9                 |
| <b>17</b>         | S11                |
| <b>7</b>          | S13                |
| <b>19</b>         | S15                |
| <b>20</b>         | S17                |
| <b>46-major</b>   | S19                |
| <b>46-minor</b>   | S21                |
| <b>47-major</b>   | S23                |
| <b>47-minor</b>   | S25                |
| <b>21</b>         | S27                |
| <b>48</b>         | S29                |
| <b>22</b>         | S31                |
| <b>49</b>         | S33                |
| <b>25</b>         | S35                |
| <b>26</b>         | S37                |
| <b>27</b>         | S39                |
| <b>50</b>         | S41                |
| <b>51</b>         | S43                |
| <b>23</b>         | S45                |
| <b>52</b>         | S47                |
| <b>6</b>          | S49                |

| <b>Compound #</b> | <b>Page Number</b> |
|-------------------|--------------------|
| <b>53-major</b>   | S51                |
| <b>53-minor</b>   | S53                |
| <b>54-major</b>   | S55                |
| <b>54-minor</b>   | S57                |
| <b>28</b>         | S59                |
| <b>55</b>         | S61                |
| <b>31</b>         | S63                |
| <b>57</b>         | S65                |
| <b>58</b>         | S67                |
| <b>59</b>         | S69                |
| <b>34</b>         | S71                |
| <b>60</b>         | S73                |
| <b>37</b>         | S75                |
| <b>5</b>          | S77                |
| <b>38</b>         | S79                |
| <b>4</b>          | S81                |
| <b>40</b>         | S83                |
| <b>41</b>         | S85                |
| <b>43</b>         | S87                |
| <b>62</b>         | S89                |
| <b>3</b>          | S91                |

Alkyne

- 7.541
- 7.541
- 7.538
- 7.529
- 7.529
- 7.528
- 7.408
- 7.405
- 7.395
- 7.393
- 7.387
- 7.385
- 7.382
- 7.380
- 7.377
- 7.370
- 7.288
- 5.540
- 4.707
- 4.704
- 4.701
- 4.691
- 4.688
- 4.684
- 4.319
- 4.317
- 4.312
- 4.310
- 4.303
- 4.301
- 4.296
- 4.294
- 4.018
- 4.014
- 4.000
- 3.997
- 3.996
- 3.983
- 3.979
- 2.579
- 2.576
- 1.828
- 1.826
- 1.825
- 1.809
- 1.807

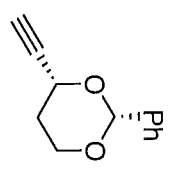

10

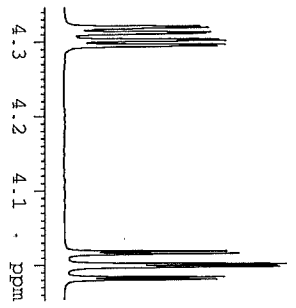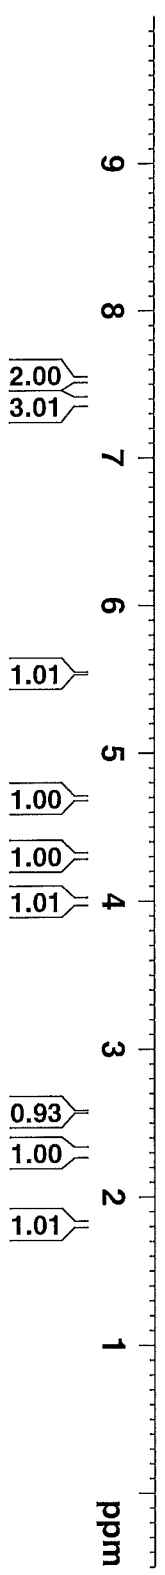

```

NAME          SUM-XV-26-Alkyne
EXPNO         1
PROCNO        1
Date_         20120329
Time          11.03
INSTRUM       spect
PROBHD        5 mm CPDCH 13C
PULPROG       zg30
TD            95236
SOLVENT       CDCl3
NS            32
DS            2
SWH           11904.762 Hz
FIDRES       0.125003 Hz
AQ           3.9999621 se
RG           22.6
DW           42.000 us
DE           6.50 us
TE           298.2 K
D1           2.00000000 se
TD0          1

===== CHANNEL f1 =====
NUC1          1H
P1            9.40 us
PL1          -3.20 dB
PL1W         33.59817505 W
SFO1         700.1516910 MH
SI           131072
SF           700.1471400 MH
WDW          EM
SSB          0
LB           0.30 Hz
GB           0
PC           1.00

```

S3

Alkyne

- 137.81
- 129.11
- 128.32
- 126.25
- 101.67
- 81.61
- 77.27
- 77.09
- 76.91
- 73.87
- 67.26
- 66.66
- 31.91

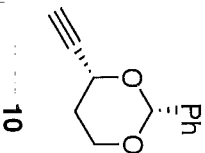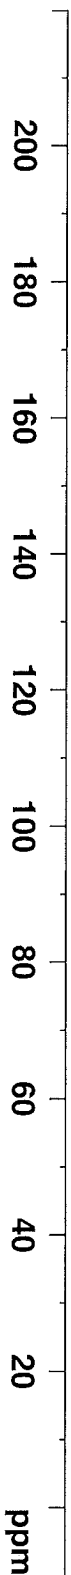

```

NAME SUM-XV-26-Alkyne
EXPNO 2
PROCNO 1
Date_ 20120329
Time 11.14
INSTRUM spect
PROBHD 5 mm CPDCH 13C
PULPROG zgpg30
TD 65536
SOLVENT CDCl3
NS 182
DS 4
SWH 41666.668 Hz
FIDRES 0.635783 Hz
AQ 0.7864820 sec
RG 203
DE 12.000 usec
TE 298.2 K
D1 2.00000000 sec
D11 0.03000000 sec
TD0 1

===== CHANNEL F1 =====
NUC1 13C
P1 9.00 usec
PL1 4.50 dB
PL1W 38.14553833 W
SF01 176.0706238 MHz

===== CHANNEL F2 =====
CPDPRG2 waltz16
NUC2 1H
PCPD2 65.00 usec
PL2 -3.20 dB
PL12 13.60 dB
PL13 120.00 dB
PL2W 33.59817505 W
PL12W 0.70196527 W
PL13W 0.00000000 W
SF02 700.1499406 MHz
SI 32768
SF 176.0521380 MHz
WDW EM
SSB 0
LB 3.00 Hz
GB 0
PC 1.40
  
```

Benzoate Ester

|       |       |       |       |       |       |       |       |       |       |       |       |       |       |       |       |       |       |       |       |       |       |       |       |       |       |       |       |       |       |       |       |       |       |       |       |       |       |       |       |       |       |       |       |       |       |
|-------|-------|-------|-------|-------|-------|-------|-------|-------|-------|-------|-------|-------|-------|-------|-------|-------|-------|-------|-------|-------|-------|-------|-------|-------|-------|-------|-------|-------|-------|-------|-------|-------|-------|-------|-------|-------|-------|-------|-------|-------|-------|-------|-------|-------|-------|
| 8.091 | 8.090 | 8.088 | 8.076 | 8.071 | 8.067 | 7.616 | 7.613 | 7.610 | 7.599 | 7.595 | 7.590 | 7.579 | 7.576 | 7.573 | 7.485 | 7.481 | 7.465 | 7.450 | 7.446 | 7.282 | 5.767 | 5.762 | 5.751 | 5.745 | 5.734 | 5.728 | 4.321 | 4.316 | 4.305 | 4.300 | 4.289 | 4.284 | 2.555 | 2.550 | 2.366 | 2.346 | 2.331 | 2.314 | 2.300 | 2.284 | 2.268 | 2.264 | 2.248 | 2.232 | 1.215 |
|-------|-------|-------|-------|-------|-------|-------|-------|-------|-------|-------|-------|-------|-------|-------|-------|-------|-------|-------|-------|-------|-------|-------|-------|-------|-------|-------|-------|-------|-------|-------|-------|-------|-------|-------|-------|-------|-------|-------|-------|-------|-------|-------|-------|-------|-------|

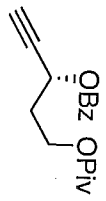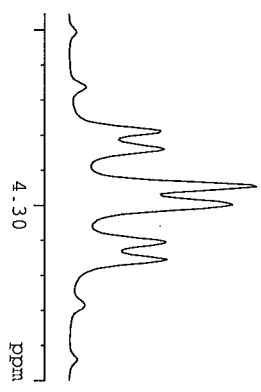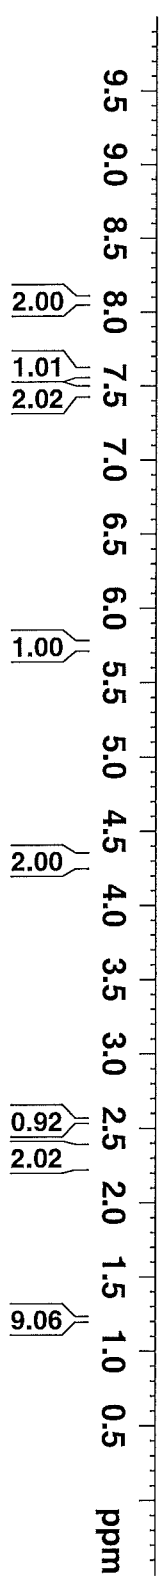

NAME SM-VII-51-R-Benzoate Est  
 EXPNO 2  
 PROCNO 1  
 Date\_ 20100810  
 Time 22.33  
 INSTRUM robinson  
 PROBRD 5 mm PABBO BB-  
 PULPROG zg30  
 TD 32768  
 SOLVENT CDCl3  
 NS 32  
 DS 2  
 SWE 6793.478 Hz  
 FIDRES 0.207320 Hz  
 AQ 2.4117749 sec  
 RG 35.9  
 DW 73.600 usec  
 DE 6.50 usec  
 TE 299.4 K  
 D1 2.00000000 sec  
 TDO 1

===== CHANNEL F1 =====  
 NUCL 1H  
 P1 14.00 usec  
 PL1 0.00 dB  
 SF01 400.1424008 MHz  
 SI 32768  
 SF 400.1400000 MHz  
 WDW EM  
 SSB 0  
 LB 0.30 Hz  
 GB 0  
 PC 1.00

Benzoate Ester

- 178.33
- 165.25
- 133.34
- 129.81
- 129.54
- 128.43
- 80.35
- 77.35
- 77.03
- 76.71
- 74.42
- 61.36
- 60.09
- 38.75
- 33.96
- 27.14

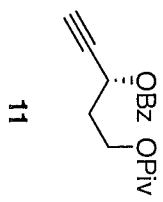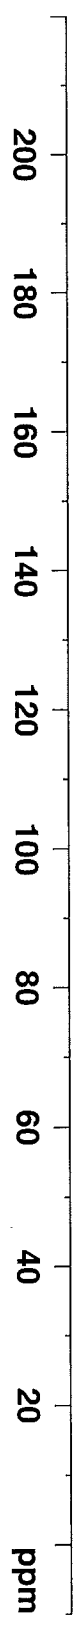

```

NAME          SM-VII-51-R-Benzoate I
EXPNO         3
PROCNO        1
Date_         20100810
Time          22.42
INSTRUM       robinson
PROBHD        5 mm PABBO BB-
PULPROG       zgpg30
TD            65536
SOLVENT       CDCl3
NS            3814
DS            4
SWH           23980.814 Hz
FIDRES       0.365918 Hz
AQ           1.3664756 sec
RG           18390.4
DM           20.850 usec
DE           6.50 usec
TE           301.7 K
D1           0.20000000 sec
D11          0.03000000 sec
TD0          1

===== CHANNEL F1 =====
NUC1          13C
P1            9.00 usec
PR1          -2.00 dB
SFO1         100.6258476 MHz

===== CHANNEL F2 =====
CPDPRG2      waltz16
NUC2          1H
PCPD2        90.00 usec
PL2          0.00 dB
PL12         16.16 dB
PL13         17.00 dB
SFO2         400.1416006 MHz
SI           32768
SF           100.6152830 MHz
WDW          EM
SSB          0
LB           1.00 Hz
GB           0
PC           1.40
  
```



Eneyne

|       |       |       |       |       |       |       |       |       |       |       |       |       |       |       |       |       |       |       |       |       |       |       |       |       |       |       |       |       |       |       |       |       |       |       |       |       |       |       |       |       |       |       |       |       |       |
|-------|-------|-------|-------|-------|-------|-------|-------|-------|-------|-------|-------|-------|-------|-------|-------|-------|-------|-------|-------|-------|-------|-------|-------|-------|-------|-------|-------|-------|-------|-------|-------|-------|-------|-------|-------|-------|-------|-------|-------|-------|-------|-------|-------|-------|-------|
| 8.100 | 8.099 | 8.097 | 8.084 | 8.079 | 8.075 | 7.611 | 7.593 | 7.588 | 7.578 | 7.574 | 7.571 | 7.485 | 7.481 | 7.466 | 7.451 | 7.447 | 6.301 | 6.290 | 6.280 | 6.261 | 6.251 | 6.241 | 5.886 | 5.882 | 5.826 | 5.822 | 5.787 | 5.782 | 4.313 | 4.297 | 4.281 | 4.244 | 4.238 | 4.234 | 4.229 | 2.343 | 2.327 | 2.316 | 2.310 | 2.300 | 2.294 | 2.284 | 1.217 | 0.921 | 0.078 |
|-------|-------|-------|-------|-------|-------|-------|-------|-------|-------|-------|-------|-------|-------|-------|-------|-------|-------|-------|-------|-------|-------|-------|-------|-------|-------|-------|-------|-------|-------|-------|-------|-------|-------|-------|-------|-------|-------|-------|-------|-------|-------|-------|-------|-------|-------|

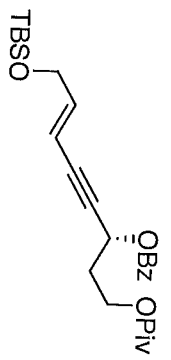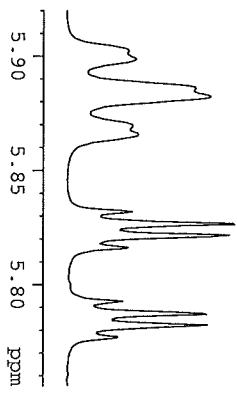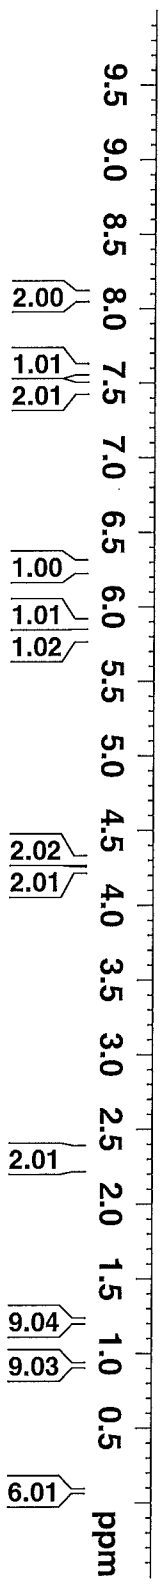

```

NAME          SUM-X-06-R-Eneyne
EXPNO         1
PROCNO        1
Date_         20110113
Time          20.53
INSTRUM       robinson
PROBHD        5 mm PABBO BB-
PULPROG       zg30
TD            32768
SOLVENT       CDCl3
NS            32
DS            2
SWH           6793.478 Hz
FIDRES       0.207320 Hz
AQ           2.4117749 se
RG           90.5
DW           73.600 us
DE           6.50 us
TE           298.2 K
D1           2.00000000 se
TD0          1

===== CHANNEL F1 =====
NUC1          1H
P1           14.00 us
PL1          0.00 dB
SF01         400.1424008 MHz
SI           32768
SF           400.1400000 MHz
WDW          EM
SSB          0
LB           0.30 Hz
GB           0
PC           1.00
  
```

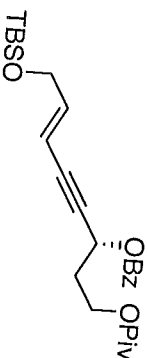

13

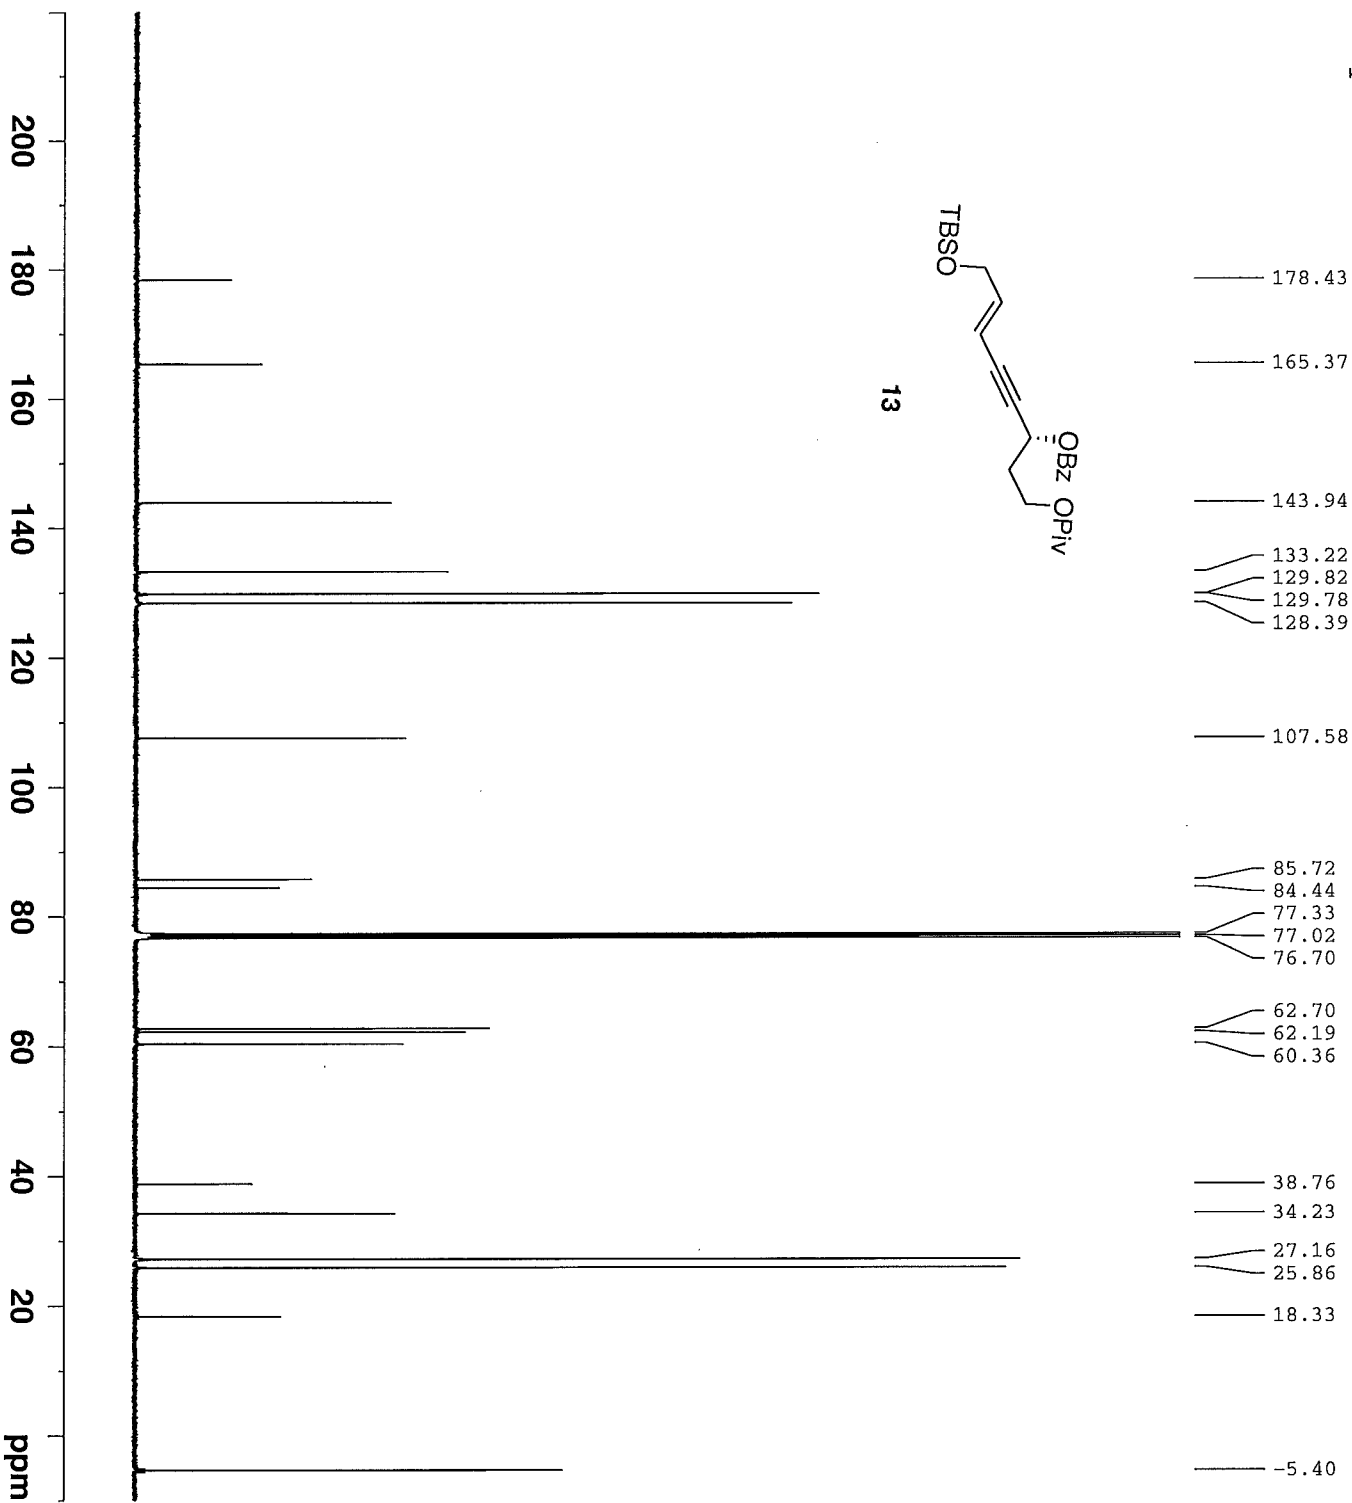

Current Data Parameters  
 NAME SUM-X-06-R-Eneayne  
 EXPNO 6  
 PROCNO 1

F2 - Acquisition Parameters  
 Date\_ 20110113  
 Time 22.02

INSTRUM robinson  
 PROBHD 5 mm PABBO BB-  
 PULPROG zgpg30  
 TD 65536  
 SOLVENT CDCl3  
 NS 19000  
 DS 4

SWH 23980.814 Hz  
 FIDRES 0.365918 Hz  
 AQ 1.3664756 sec

RG 16384  
 DW 20.850 usec  
 DE 6.50 usec  
 TE 299.3 K

D1 0.20000000 sec  
 D11 0.03000000 sec  
 TD0 1

==== CHANNEL F1 =====  
 NUC1 13C  
 P1 9.00 usec  
 PL1 -2.00 dB  
 SF01 100.6258476 MHz

==== CHANNEL F2 =====  
 CPDPRG2 waltz16  
 NUC2 1H  
 PCPD2 90.00 usec  
 PL2 0.00 dB  
 PL12 16.16 dB  
 PL13 17.00 dB  
 SF02 400.1416006 MHz

F2 - Processing parameters  
 SI 32768  
 SF 100.6152830 MHz  
 WDM EM  
 SSB 0  
 LB 1.00 Hz  
 GB 0  
 PC 1.40

Diol

- 8.086
- 8.083
- 8.066
- 8.062
- 7.610
- 7.591
- 7.496
- 7.477
- 7.461
- 7.458
- 7.291
- 5.782
- 4.502
- 4.498
- 4.489
- 4.485
- 4.354
- 4.338
- 4.290
- 4.274
- 3.838
- 3.825
- 3.813
- 3.799
- 3.787
- 3.768
- 3.765
- 3.762
- 3.757
- 3.744
- 3.731
- 2.830
- 2.827
- 2.822
- 2.817
- 2.814
- 2.722
- 2.707
- 2.337
- 2.319
- 2.303
- 2.286
- 1.224
- 0.909
- 0.095
- 0.086

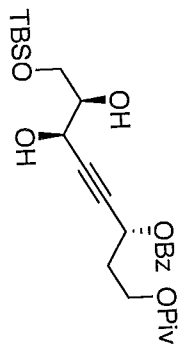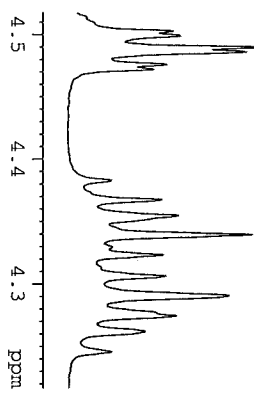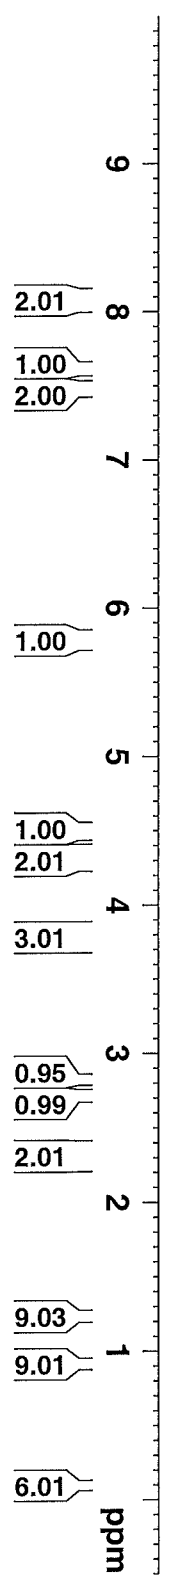

```

NAME          SM-VI-80-R-Di01
EXPNO         3
PROCNO        1
Date_         20100425
Time          23.00
INSTRUM       spect
PROBHD        5 mm PABBO BB-
PULPROG       zg30
TD            32768
SOLVENT       CDCl3
NS            32
DS            2
SWH           6410.256 Hz
FIDRES       0.195625 Hz
AQ           2.5559540 se
RG           128
DE           78.000 us
TE           300.1 K
D1           2.00000000 se
TD0          1

===== CHANNEL F1 =====
NUC1          1H
P1           14.00 us
PL1          0.00 dB
PL1W        10.27361584 W
SF01        400.1378009 MH
SI           32768
SF          400.1350000 MH
WDW          EM
SSB          0
LB           0.30 Hz
GB           0
PC           1.00
  
```

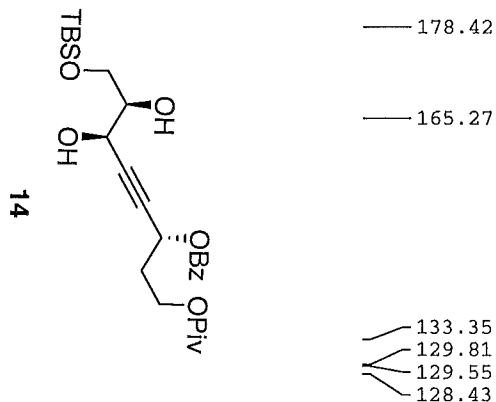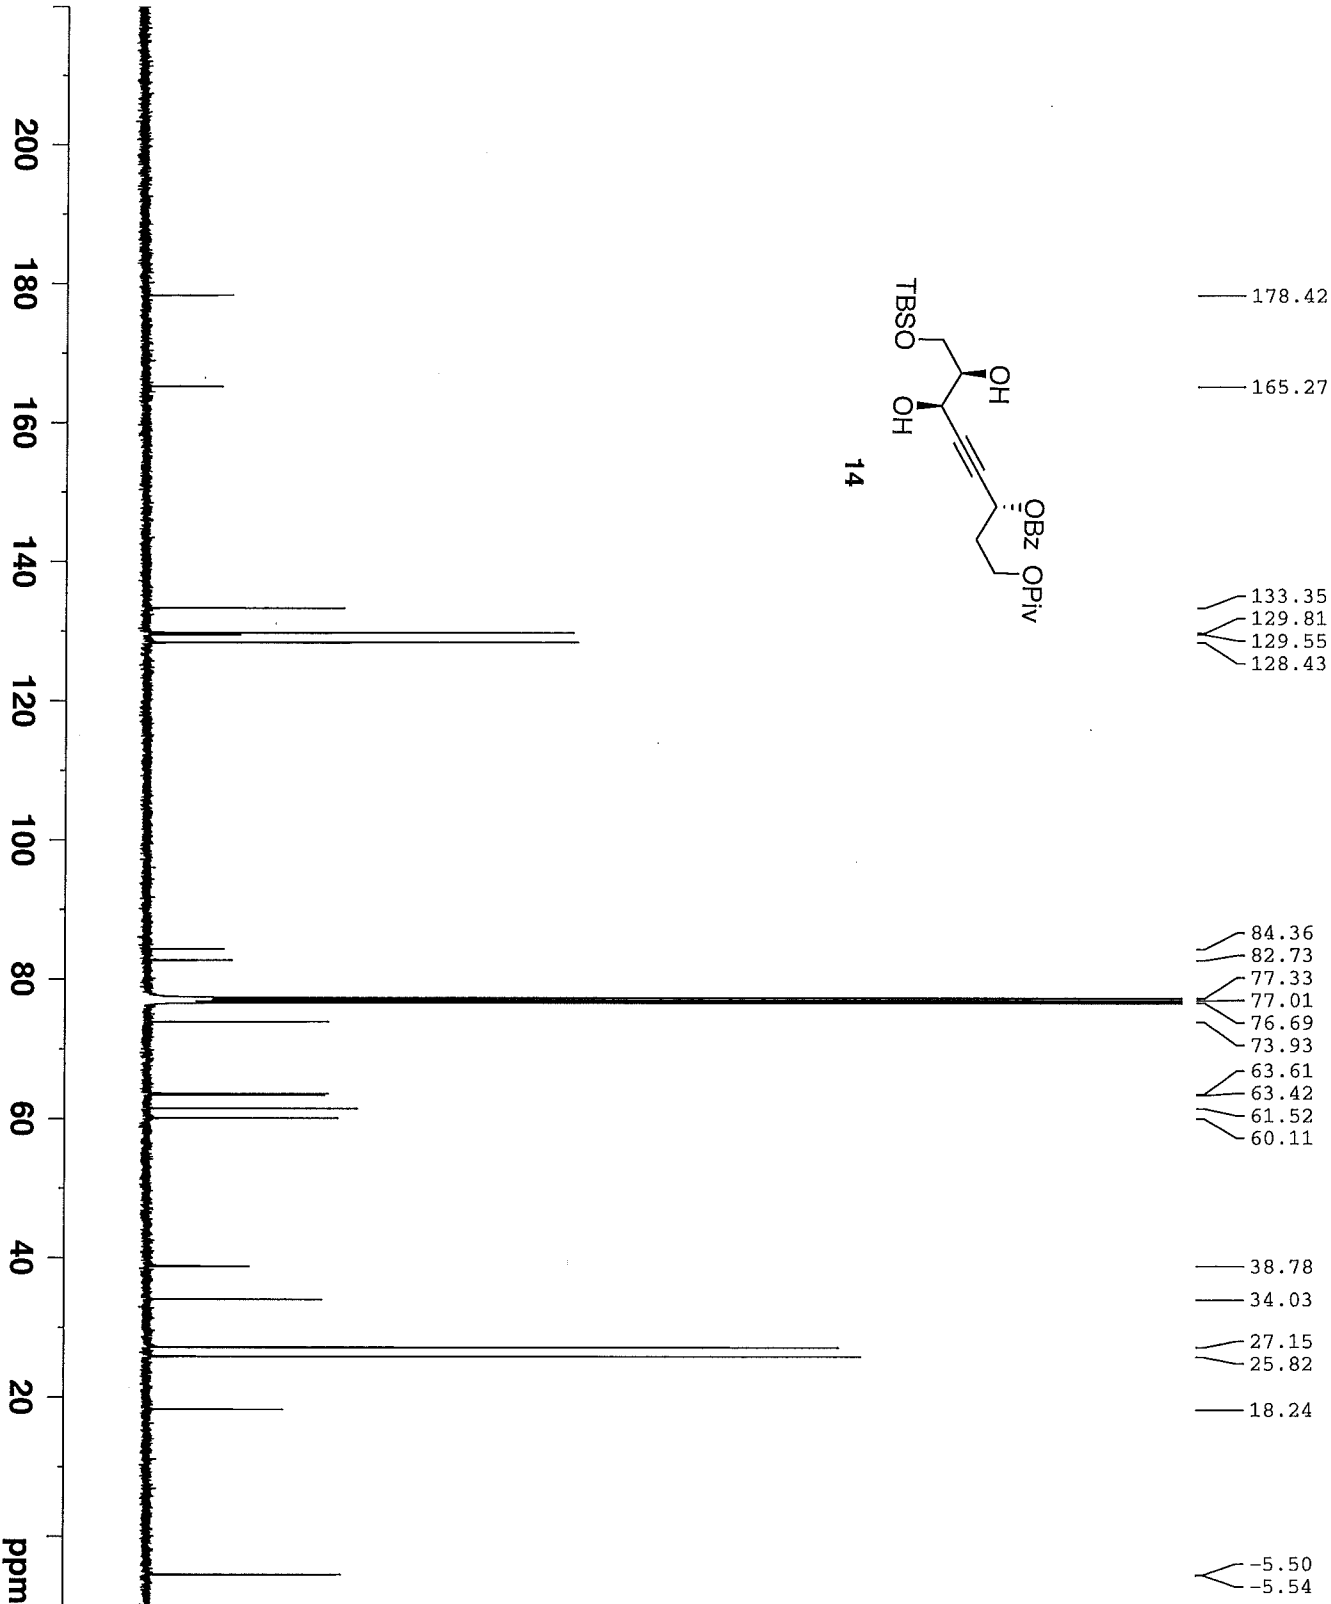

| NAME       | EXPNO       | PROCNO | Date_    | Time  | INSTRUM | PROBHD    | PULPROG | TD    | SOLVENT | NS   | DS | SWH       | FIDRES   | AQ        | RG    | DW     | DE   | TE    | D1         | D11        | TD0 |
|------------|-------------|--------|----------|-------|---------|-----------|---------|-------|---------|------|----|-----------|----------|-----------|-------|--------|------|-------|------------|------------|-----|
|            | 4           | 1      | 20100425 | 23.12 | spect   | PABBO BB- | zgpg30  | 65536 | CDCl3   | 9810 | 4  | 25125.629 | 0.383387 | 1.3042164 | 16384 | 19.900 | 6.50 | 301.3 | 2.00000000 | 0.03000000 | 1   |
| CHANNEL F1 | ====        |        |          |       |         |           |         |       |         |      |    |           |          |           |       |        |      |       |            |            |     |
| NUC1       | 13C         |        |          |       |         |           |         |       |         |      |    |           |          |           |       |        |      |       |            |            |     |
| P1         | 9.00        |        |          |       |         |           |         |       |         |      |    |           |          |           |       |        |      |       |            |            |     |
| PL1        | -2.00       |        |          |       |         |           |         |       |         |      |    |           |          |           |       |        |      |       |            |            |     |
| PL1W       | 46.89702606 |        |          |       |         |           |         |       |         |      |    |           |          |           |       |        |      |       |            |            |     |
| SFO1       | 100.6255966 |        |          |       |         |           |         |       |         |      |    |           |          |           |       |        |      |       |            |            |     |
| CHANNEL F2 | ====        |        |          |       |         |           |         |       |         |      |    |           |          |           |       |        |      |       |            |            |     |
| CPDPRG2    | waitz16     |        |          |       |         |           |         |       |         |      |    |           |          |           |       |        |      |       |            |            |     |
| NUC2       | 1H          |        |          |       |         |           |         |       |         |      |    |           |          |           |       |        |      |       |            |            |     |
| PCPD2      | 90.00       |        |          |       |         |           |         |       |         |      |    |           |          |           |       |        |      |       |            |            |     |
| PL2        | 0.00        |        |          |       |         |           |         |       |         |      |    |           |          |           |       |        |      |       |            |            |     |
| PL12       | 16.16       |        |          |       |         |           |         |       |         |      |    |           |          |           |       |        |      |       |            |            |     |
| PL13       | 17.00       |        |          |       |         |           |         |       |         |      |    |           |          |           |       |        |      |       |            |            |     |
| PL2W       | 10.27361584 |        |          |       |         |           |         |       |         |      |    |           |          |           |       |        |      |       |            |            |     |
| PL12W      | 0.24872722  |        |          |       |         |           |         |       |         |      |    |           |          |           |       |        |      |       |            |            |     |
| PL13W      | 0.20498557  |        |          |       |         |           |         |       |         |      |    |           |          |           |       |        |      |       |            |            |     |
| SFO2       | 400.1366005 |        |          |       |         |           |         |       |         |      |    |           |          |           |       |        |      |       |            |            |     |
| SI         | 32768       |        |          |       |         |           |         |       |         |      |    |           |          |           |       |        |      |       |            |            |     |
| SF         | 100.6140260 |        |          |       |         |           |         |       |         |      |    |           |          |           |       |        |      |       |            |            |     |
| WDW        | EM          |        |          |       |         |           |         |       |         |      |    |           |          |           |       |        |      |       |            |            |     |
| SSB        | 0           |        |          |       |         |           |         |       |         |      |    |           |          |           |       |        |      |       |            |            |     |
| LB         | 1.00        |        |          |       |         |           |         |       |         |      |    |           |          |           |       |        |      |       |            |            |     |
| GB         | 0           |        |          |       |         |           |         |       |         |      |    |           |          |           |       |        |      |       |            |            |     |
| PC         | 1.40        |        |          |       |         |           |         |       |         |      |    |           |          |           |       |        |      |       |            |            |     |

bis-TBS Ether  
 8.098  
 8.097  
 8.087  
 8.085  
 7.659  
 7.648  
 7.637  
 7.526  
 7.515  
 7.503  
 7.290  
 6.110  
 6.108  
 5.089  
 5.081  
 4.986  
 4.978  
 4.267  
 4.260  
 4.251  
 4.242  
 4.239  
 4.230  
 4.220  
 3.855  
 3.846  
 3.795  
 3.784  
 3.781  
 3.770  
 3.670  
 3.662  
 3.656  
 3.648  
 2.019  
 2.009  
 1.999  
 1.220  
 0.939  
 0.847  
 0.114  
 0.113  
 0.050  
 -0.033

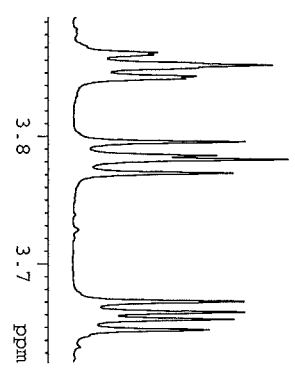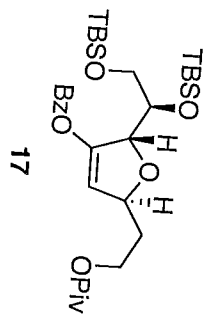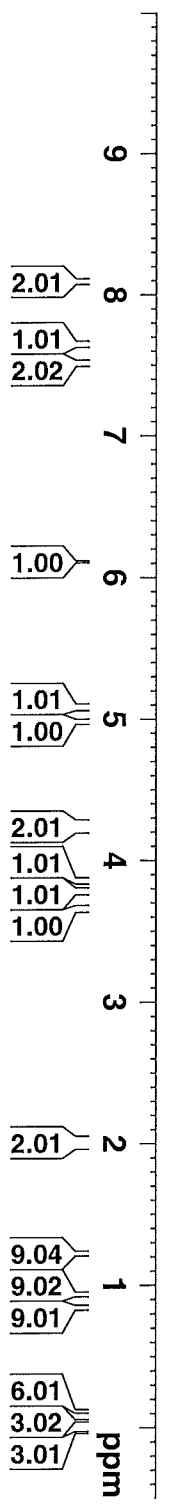

```

NAME          SUM-XI-77-bis-TBS Eth
EXPNO         1
PROCNO        1
Date_         20110609
Time         22.08
INSTRUM       spect
PROBHD        5 mm CPDCH 13C
PULPROG       zg30
TD            2930
SOLVENT       CDCl3
NS            32
DS            2
SWH           11904.762 Hz
FIDRES       0.181652 Hz
AQ           2.7525620 sec
RG           45.2
DE           42.000 usec
TE           298.2 K
D1           2.00000000 sec
TD0          1

===== CHANNEL F1 =====
NUC1          1H
P1            9.40 usec
PL1          -3.20 dB
PIL1W        33.59817505 W
SFO1         700.1245508 MHz
SI           65536
SF           700.1200000 MHz
WDW          EM
SSB          0
LB           0.30 Hz
GB           0
PC           1.00
  
```



Ketone

- 7.282
- 4.673
- 4.264
- 4.249
- 4.233
- 4.153
- 4.055
- 4.051
- 4.042
- 4.038
- 4.033
- 4.029
- 4.020
- 4.016
- 3.759
- 3.736
- 3.713
- 3.570
- 3.556
- 3.546
- 3.533
- 2.590
- 2.574
- 2.545
- 2.529
- 2.287
- 2.284
- 2.264
- 2.262
- 2.242
- 2.239
- 2.219
- 2.217
- 2.045
- 2.040
- 2.026
- 2.022
- 2.007
- 1.990
- 1.216
- 0.902
- 0.848
- 0.082
- 0.080
- 0.068
- 0.025

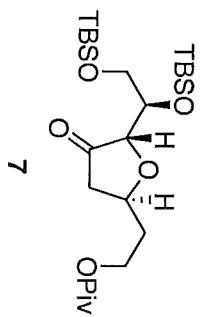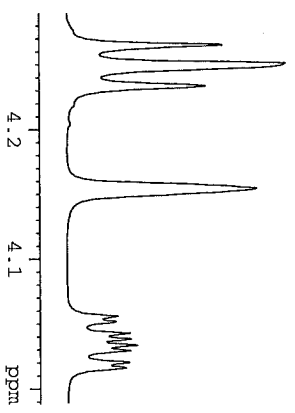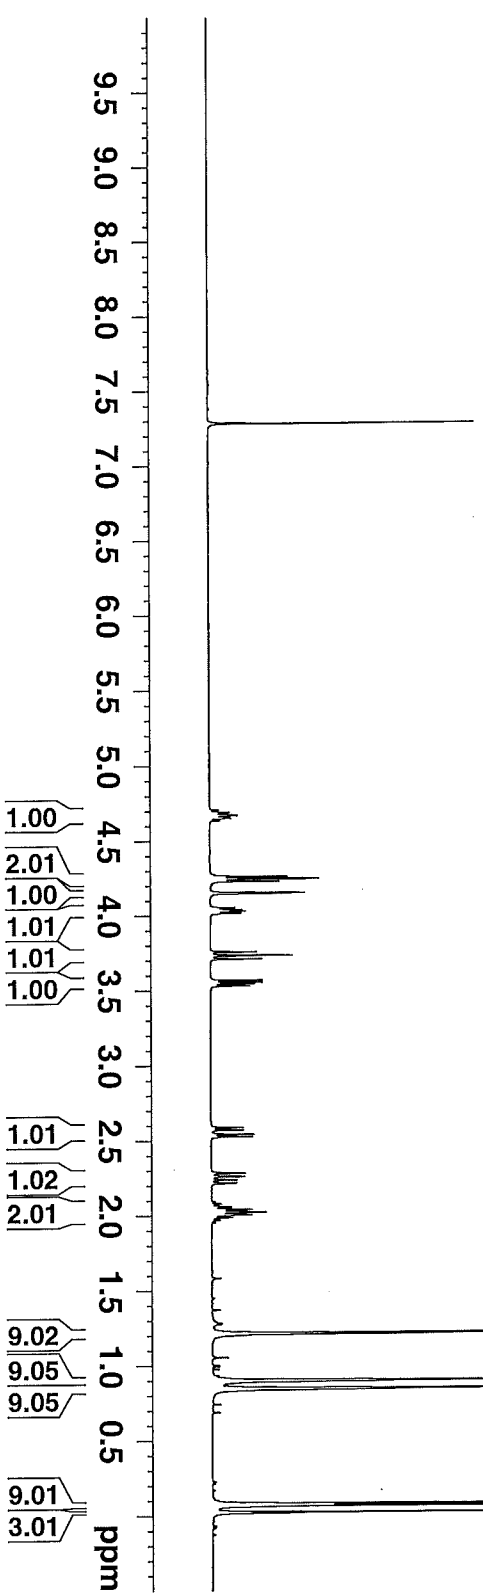

1.00  
2.01  
1.00  
1.01  
1.01  
1.00  
1.01  
1.02  
2.01  
9.02  
9.05  
9.05  
9.01  
3.01

NAME SUM-X-21-R-piv Protecti  
 EXPNO 1  
 PROCNO 1  
 Date\_ 20110128  
 time 21.53  
 INSTRUM robinson  
 PROBHD 5 mm PABBO BB-  
 PULPROG zg30  
 TD 32768  
 SOLVENT CDCl3  
 NS 32  
 DS 2  
 SWH 6793.478 Hz  
 FIDRES 0.207320 Hz  
 AQ 2.4117749 sec  
 RG 90.5  
 DW 73.600 usec  
 DE 6.50 usec  
 TE 298.7 K  
 D1 2.0000000 sec  
 TD0 1

==== CHANNEL f1 =====  
 NUC1 1H  
 P1 14.00 usec  
 PL 0.00 dB  
 SFO1 400.1424008 MHz  
 SI 32768  
 SF 400.1400000 MHz  
 WDW EM  
 SSB 0  
 LB 0.30 Hz  
 GB 0  
 PC 1.00

Ketone

216.83  
178.43

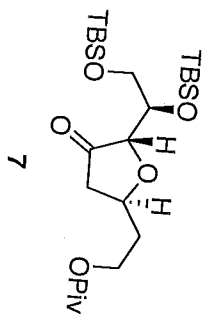

80.13  
77.33  
77.01  
76.69  
74.94  
74.70  
63.00  
61.04  
43.64  
38.71  
35.53  
27.20  
25.90  
25.74  
18.30  
17.83  
4.42  
5.27

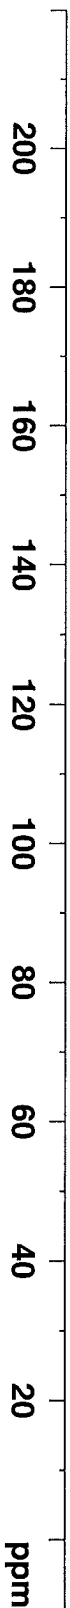

NAME SM-IV-97-R-Ketor

EXPNO 3  
PROCNO 1  
Date\_ 20100423  
Time 23.43  
INSTRUM spect  
PROBHD 5 mm PABBO BB-  
PULPROG zgpg30  
TD 65536  
SOLVENT CDCl3  
NS 10240  
DS 4  
SWH 25125.629 F  
FIDRES 0.383387 F  
AQ 1.3042164 S  
RG 18390.4  
DW 19.900 F  
DE 6.50 F  
TE 301.0 F  
D1 2.00000000 S  
D11 0.03000000 S  
TD0 1

==== CHANNEL f1 =====  
NUC1 13C  
P1 9.00 F  
PL1 -2.00 C  
PL1W 46.89702606 F  
SFO1 100.6255966 F  
==== CHANNEL f2 =====  
CPDPRG2 waltz16  
NUC2 1H  
PCPD2 90.00 F  
PL2 0.00 C  
PL12 16.16 C  
PL13 17.00 C  
PL2W 10.27361584 F  
PL12W 0.24872722 F  
PL13W 0.20498557 F  
SFO2 400.1366005 F  
SI 32768  
SF 100.6140260 F  
WDW EM  
SSB 0  
LB 1.00 F  
GB 0  
PC 1.40



7.290  
6.131  
6.127  
5.347  
5.343  
5.088  
5.083  
5.079  
5.075  
5.071  
4.330  
4.322  
4.318  
4.316  
4.313  
4.310  
4.306  
4.299  
4.297  
4.079  
4.077  
4.072  
4.070  
4.067  
4.064  
4.059  
4.057  
3.772  
3.759  
3.745  
3.558  
3.550  
3.544  
3.536  
2.176  
1.978  
1.965  
1.957  
1.224  
0.911  
0.787  
0.093  
0.090  
0.041  
-0.038

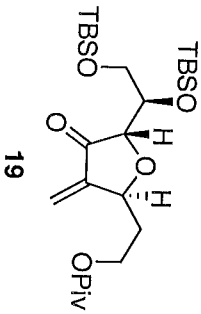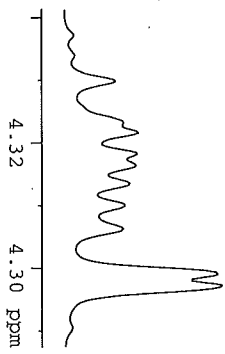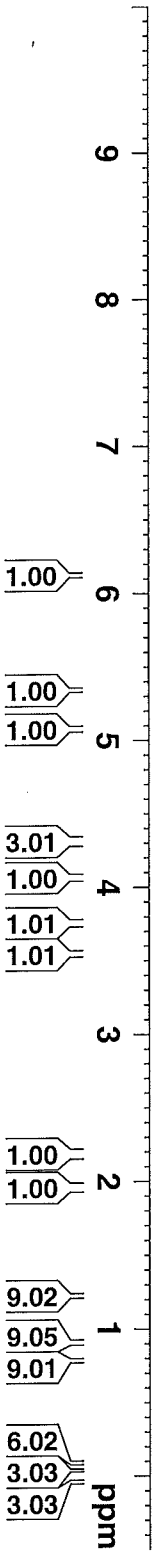

```

NAME          SUM-X-18-Enone
EXPNO         1
PROCNO        1
Date_         20110131
Time          16.51
INSTRUM       spect
PROBHD        5 mm CPDCH 13C
PULPROG       zg30
TD            65536
SOLVENT       CDCl3
NS            32
DS            2
SWH           11904.762 Hz
FIDRES        0.181652 Hz
AQ            2.7525620 se
RG            45.2
DE            42.000 us
TE            298.2 K
D1            2.00000000 se
TD0           1

===== CHANNEL f1 =====
NUC1          1H
P1            9.40 us
PL1          -3.20 dB
PL1W         33.59817505 W
SFO1         700.1245508 MHz
SI           65536
SF           700.1200000 MHz
WDW          EM
SSB           0
LB            0.30 Hz
GB            0
PC            1.00
  
```

Enone

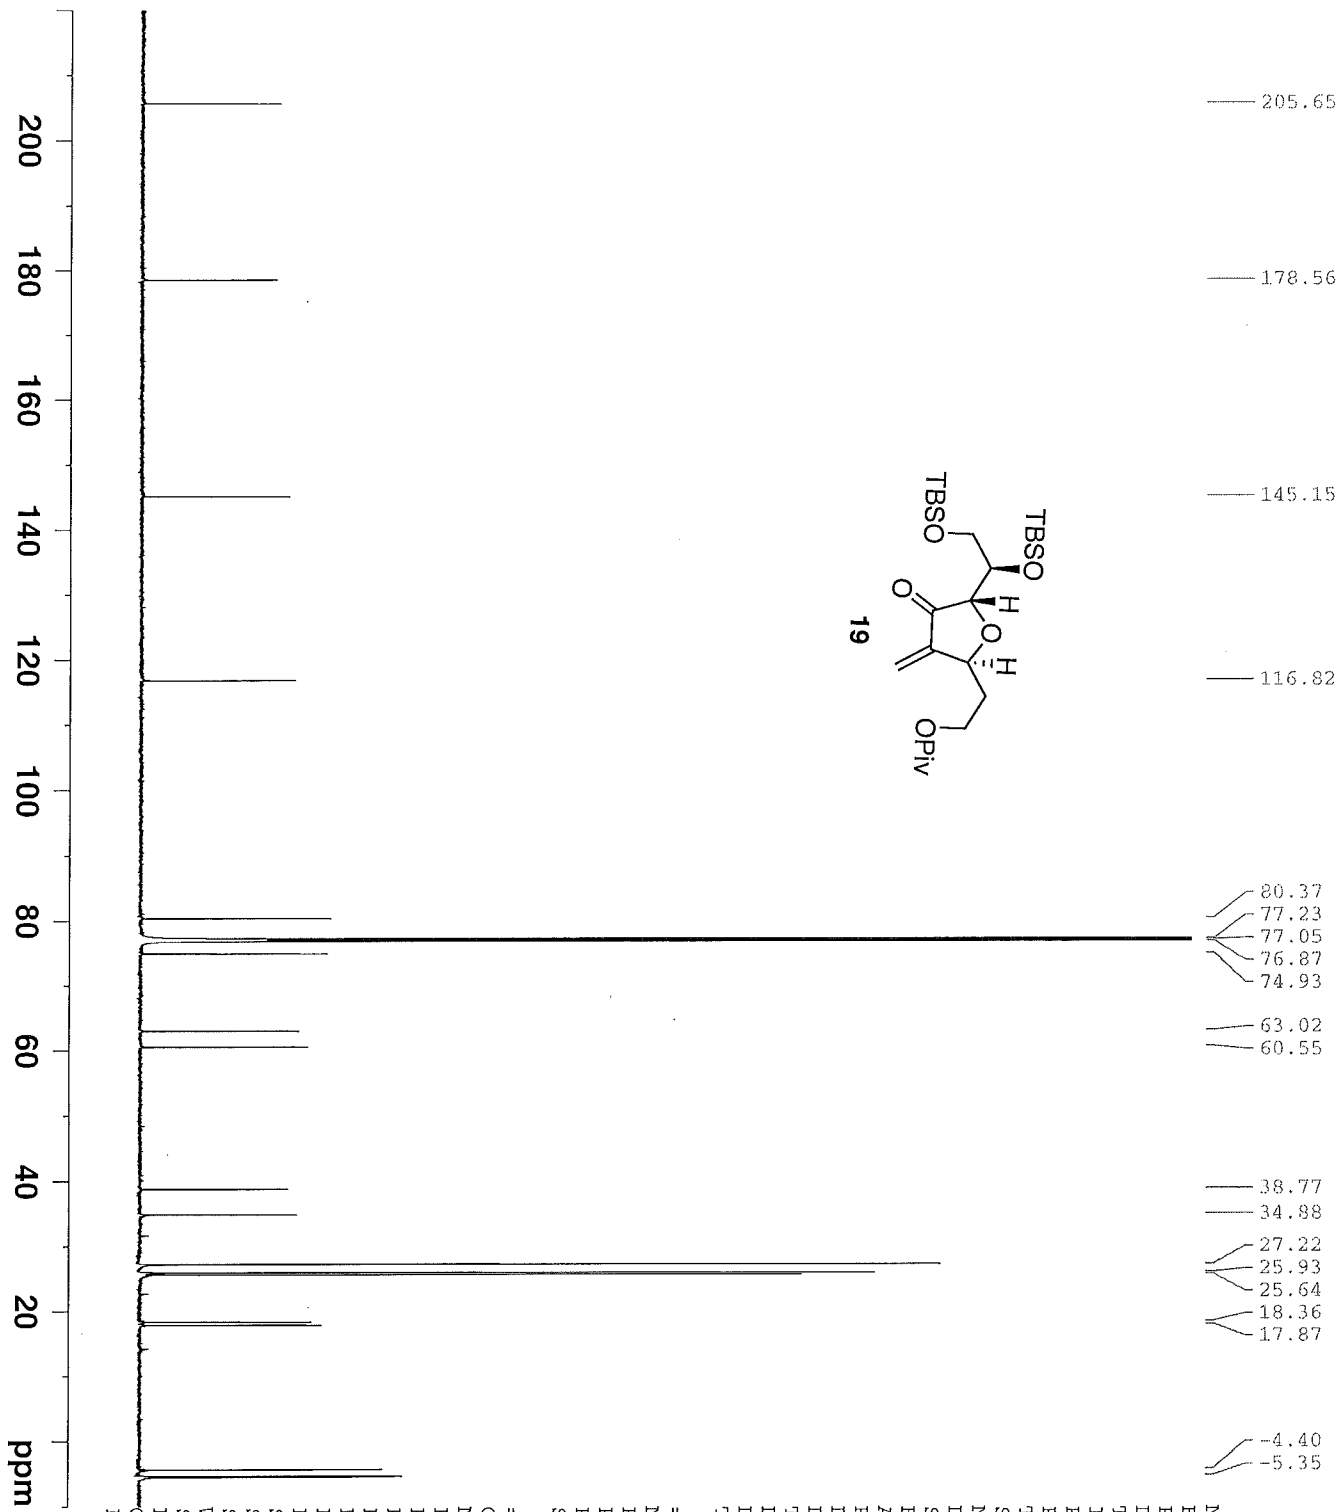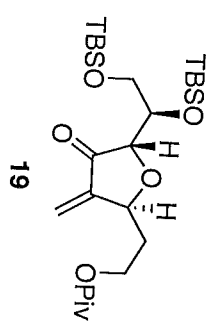

```

NAME SUM-X-18-Enone
EXPNO 2
PROCNO 1
Date_ 20110131
Time 16.58
INSTRUM spect
PROBHD 5 mm CPDCH 13C
PULPROG zgpg30
TD 98304
SOLVENT CDCl3
NS 269
DS 4
SWH 41666.668 Hz
FIDRES 0.423855 Hz
AQ 1.1796980 sec
RG 203
DM 12.000 usec
DE 15.00 usec
TE 298.2 K
D1 2.0000000 sec
D11 0.0300000 sec
TD0 1

===== CHANNEL f1 =====
NUC1 13C
P1 9.00 usec
PL1 4.50 dB
PL1W 38.14553833 W
SFO1 176.0637988 MHz

===== CHANNEL f2 =====
CPDPRG2 waltz16
NUC2 1H
PCPD2 65.00 usec
PL2 -3.20 dB
PL12 13.60 dB
PL13 120.00 dB
PL12W 33.59817505 W
PL13W 0.70196527 W
SFO2 700.1228005 MHz
SI 131072
SF 176.0453140 MHz
WDW EM
SSB 0
LB 3.00 Hz
GB 0
PC 1.40
  
```

Alpha-Me-Ketone

|       |
|-------|
| 7.292 |
| 4.363 |
| 4.349 |
| 4.347 |
| 4.333 |
| 4.325 |
| 4.310 |
| 4.305 |
| 4.301 |
| 4.297 |
| 4.293 |
| 4.173 |
| 4.168 |
| 4.164 |
| 4.160 |
| 4.091 |
| 4.087 |
| 4.078 |
| 4.074 |
| 4.067 |
| 4.063 |
| 4.055 |
| 4.051 |
| 3.766 |
| 3.742 |
| 3.719 |
| 3.562 |
| 3.550 |
| 3.539 |
| 3.526 |
| 2.179 |
| 2.156 |
| 2.153 |
| 2.126 |
| 2.007 |
| 1.985 |
| 1.971 |
| 1.228 |
| 1.106 |
| 1.088 |
| 0.909 |
| 0.854 |
| 0.090 |
| 0.087 |
| 0.079 |
| 0.009 |

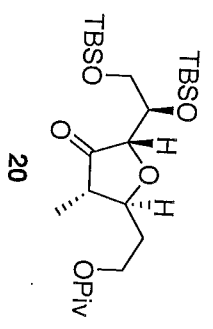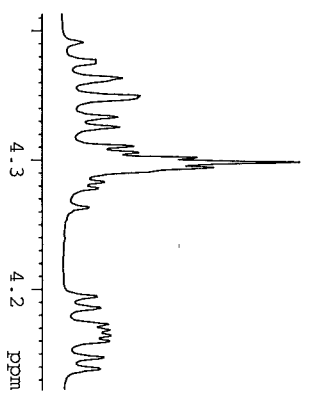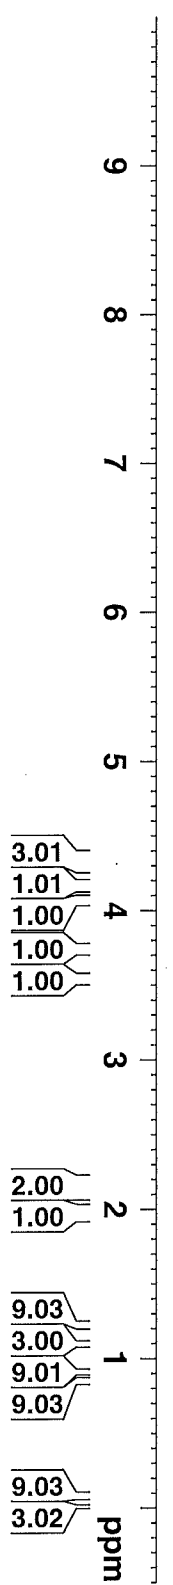

NAME SM-VII-10-R-Hydrogenati  
 EXPNO 4  
 PROCNO 1  
 Date\_ 20100512  
 Time 22:39  
 INSTRUM spect  
 PROBHD 5 mm PABBO BB-  
 PULPROG zg30  
 TD 32768  
 SOLVENT CDCl3  
 NS 32  
 DS 2  
 SWH 6410.256 Hz  
 FIDRES 0.195625 Hz  
 AQ 2.5559540 sec  
 RG 90.5  
 DW 78.000 usec  
 DE 6.50 usec  
 TE 299.4 K  
 D1 2.00000000 sec  
 TD0 1

===== CHANNEL F1 =====  
 NUC1 1H  
 P1 14.00 usec  
 PL1 0.00 dB  
 PL1W 10.27361584 W  
 SF01 400.1378009 MHz  
 SI 32768  
 SF 400.1350000 MHz  
 WDW EM  
 SSB 0  
 LB 0.30 Hz  
 GB 0  
 PC 1.00

Alpha-Me-Ketone

218.08  
178.49

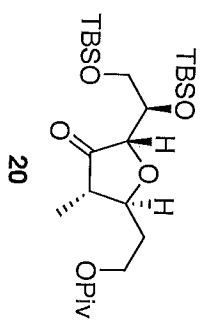

81.30  
80.02  
77.32  
77.01  
76.69  
74.37  
62.89  
60.91  
48.11  
38.71  
34.28  
27.21  
25.90  
25.85  
18.30  
17.78  
9.65  
4.58  
4.80

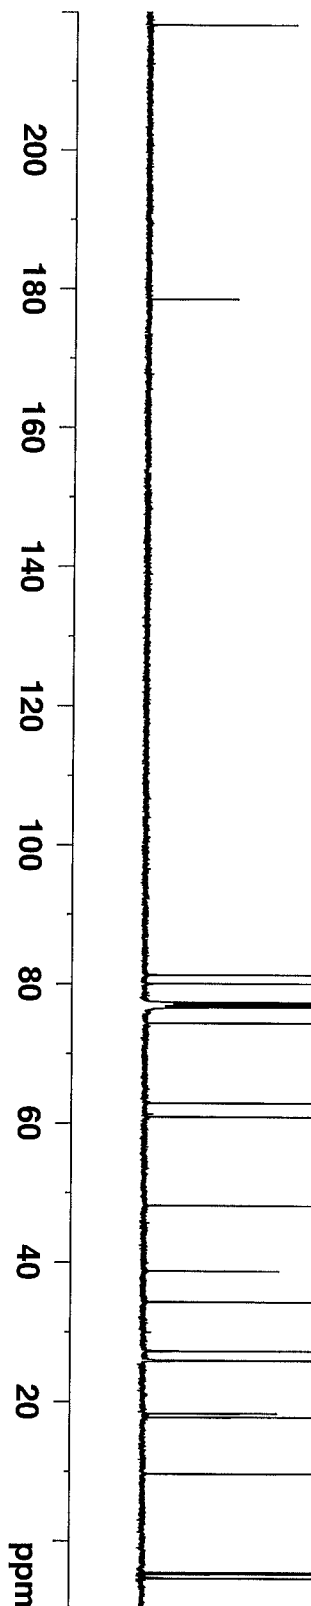

NAME SM-VII-10-R-Hydrogena  
EXPNO 5  
PROCNO 1  
Date\_ 20100512  
Time 22.56  
INSTRUM spect  
PROBHD 5 mm PABBO BB-  
PULPROG zgpg30  
TD 65536  
SOLVENT CDC13  
NS 10240  
DS 4  
SWH 25125.629 Hz  
FIDRES 0.38387 Hz  
AQ 1.3042164 sec  
RG 20642.5  
DW 19.900 usec  
DE 6.50 usec  
TE 300.6 K  
D1 2.00000000 sec  
D11 0.03000000 sec  
TDO 1

==== CHANNEL f1 =====  
NUC1 13C  
P1 9.00 usec  
PL1 -2.00 dB  
PL1W 46.89702606 W  
SFO1 100.6255966 MHz

==== CHANNEL f2 =====  
CPDPRG2 waltz16  
NUC2 1H  
PCPD2 90.00 usec  
PL2 0.00 dB  
PL12 16.16 dB  
PL13 17.00 dB  
PL2W 10.27361584 W  
PL12W 0.24872722 W  
PL13W 0.20498557 W  
SFO2 400.1366005 MHz  
ST 32768  
SF 100.6140260 MHz  
WDW EM  
SSB 0  
LB 1.00 Hz  
GB 0  
PC 1.40

Alcohol (Major Isomer)

|       |
|-------|
| 7.291 |
| 4.319 |
| 4.307 |
| 4.301 |
| 4.191 |
| 4.186 |
| 4.170 |
| 4.159 |
| 4.151 |
| 4.143 |
| 4.134 |
| 4.127 |
| 3.985 |
| 3.977 |
| 3.965 |
| 3.955 |
| 3.884 |
| 3.878 |
| 3.751 |
| 3.744 |
| 3.731 |
| 3.724 |
| 3.641 |
| 3.626 |
| 3.616 |
| 3.609 |
| 3.587 |
| 3.572 |
| 3.569 |
| 3.562 |
| 1.934 |
| 1.924 |
| 1.918 |
| 1.906 |
| 1.899 |
| 1.680 |
| 1.675 |
| 1.216 |
| 1.074 |
| 1.057 |
| 0.940 |
| 0.906 |
| 0.137 |
| 0.134 |
| 0.130 |
| 0.110 |

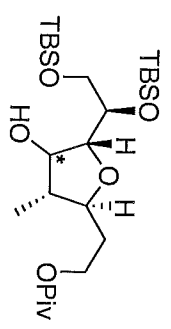

46-major

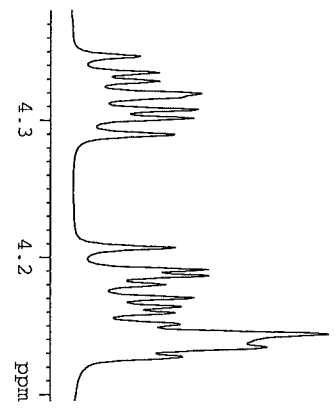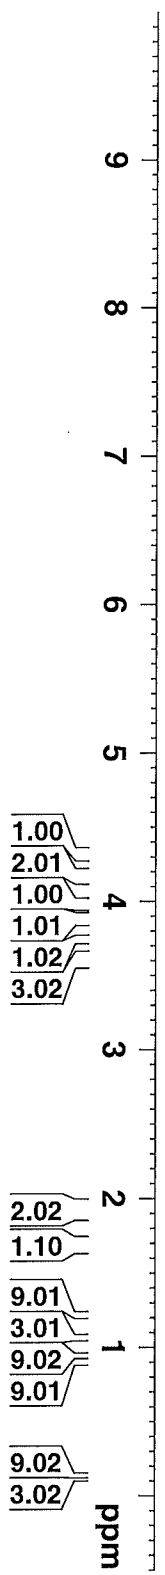

```

NAME SM-VII-12-R-Alcoh
EXPNO 2
PROCNO 1
Date_ 20100518
Time 10.56
INSTRUM spect
PROBHD 5 mm PABBO BB-
PULPROG zg30
TD 32768
SOLVENT CDCl3
NS 32
DS 2
SWH 6410.256 Hz
FIDRES 0.195625 Hz
AQ 2.5559540 sec
RG 35.9
DW 78.000 usec
DE 6.50 usec
TE 299.0 K
D1 2.00000000 sec
TD0 1

===== CHANNEL f1 =====
NUC1 1H
P1 14.00 usec
PL1 0.00 dB
PL1W 10.27361584 W
SFO1 400.1378009 MHZ
SI 32768
SF 400.1350000 MHZ
WDW EM
SSB 0
LB 0.30 Hz
GB 0
PC 1.00
  
```

Alcohol (Major Isomer)

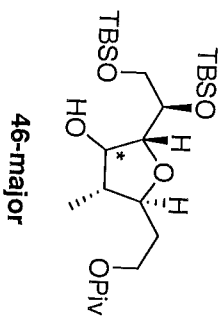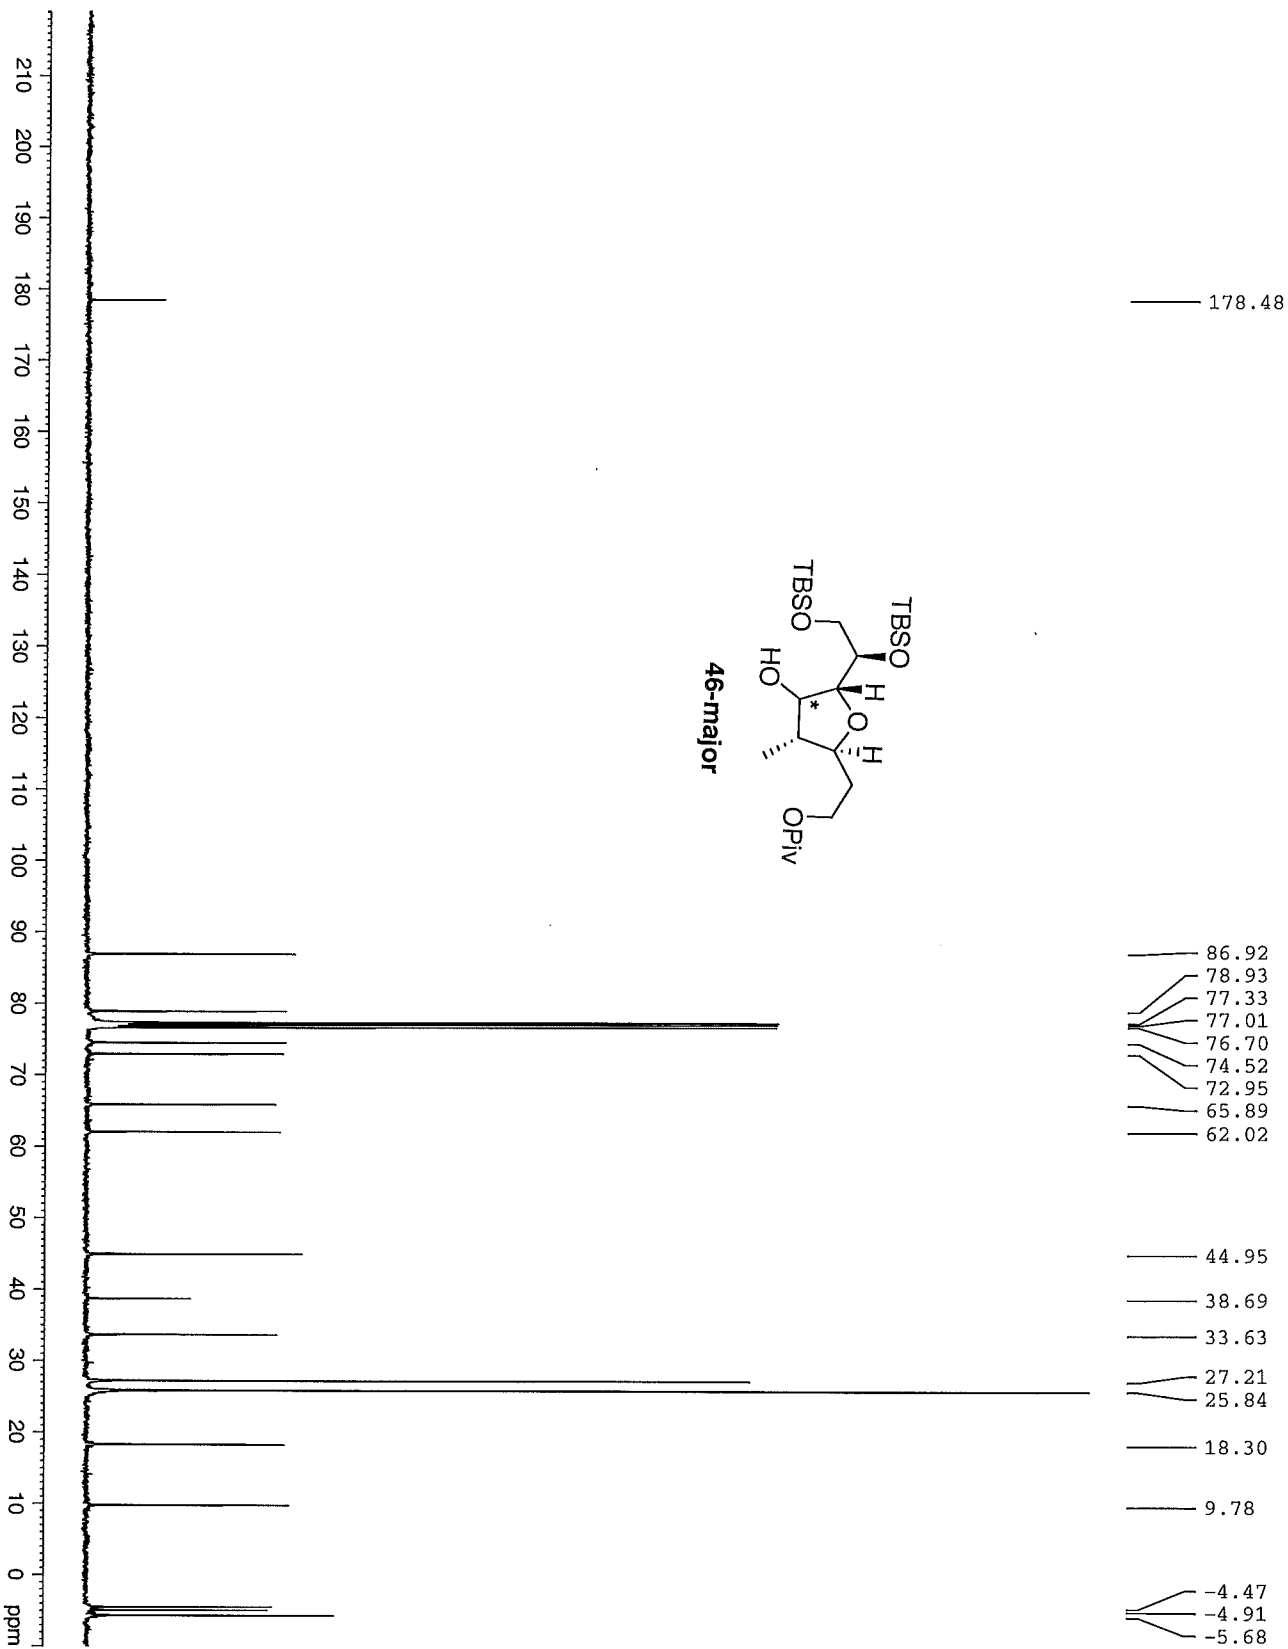

178.48

- 86.92
- 78.93
- 77.33
- 77.01
- 76.70
- 74.52
- 72.95
- 65.89
- 62.02
- 44.95
- 38.69
- 33.63
- 27.21
- 25.84
- 18.30
- 9.78
- 4.47
- 4.91
- 5.68

Current Data Parameters  
 NAME SUM-VII-12-Alcoh  
 EXMNO 5  
 PROCN 1  
 DU /m  
 USER Subnam

F2 - Acquisition Parameters  
 Date\_ 20100517  
 Time 20.24  
 INSTRUM DPX400  
 PROBHD 5 mm BBO BB-1H  
 PULPROG zgpg30  
 TD 65536  
 SOLVENT CDC13  
 NS 2314  
 DS 4  
 SWH 23980.814 Hz  
 FIDRES 0.365918 Hz  
 AQ 1.3664756 s  
 RG 3649.1  
 DW 20.850 us  
 DE 6.00 us  
 TE 300.2 K  
 D1 2.00000000 s  
 d11 0.03000000 s  
 DELTA 1.89999998 s  
 TD 1

==== CHANNEL F1 =====  
 NUC1 13C  
 P1 8.30 us  
 PL1 -3.00 dB  
 SFO1 100.6517495 MHz

==== CHANNEL F2 =====  
 CPDPRG2 waltz16  
 NUC2 1H  
 PCPD2 90.00 us  
 PL2 -3.00 dB  
 PL12 15.00 dB  
 PL13 15.00 dB  
 SFO2 400.2466010 MHz

F2 - Processing Parameters:  
 SI 32768  
 SF 100.6416850 MHz  
 WDW EM  
 SSB 0  
 LB 3.00 Hz  
 GB 0  
 PC 1.40

Minor Alcohol

|       |       |       |       |       |       |       |       |       |       |       |       |       |       |       |       |       |       |       |       |       |       |       |       |       |       |       |       |       |       |       |       |       |       |       |       |       |       |       |       |       |       |       |       |
|-------|-------|-------|-------|-------|-------|-------|-------|-------|-------|-------|-------|-------|-------|-------|-------|-------|-------|-------|-------|-------|-------|-------|-------|-------|-------|-------|-------|-------|-------|-------|-------|-------|-------|-------|-------|-------|-------|-------|-------|-------|-------|-------|-------|
| 7.290 | 4.266 | 4.260 | 4.257 | 4.169 | 4.166 | 4.157 | 4.154 | 3.748 | 3.742 | 3.733 | 3.727 | 3.717 | 3.712 | 3.705 | 3.702 | 3.696 | 3.693 | 3.689 | 3.686 | 3.666 | 3.656 | 3.645 | 3.636 | 3.631 | 3.627 | 3.620 | 3.618 | 3.614 | 3.604 | 1.933 | 1.911 | 1.902 | 1.798 | 1.790 | 1.215 | 1.096 | 1.087 | 0.929 | 0.905 | 0.134 | 0.129 | 0.111 | 0.088 |
|-------|-------|-------|-------|-------|-------|-------|-------|-------|-------|-------|-------|-------|-------|-------|-------|-------|-------|-------|-------|-------|-------|-------|-------|-------|-------|-------|-------|-------|-------|-------|-------|-------|-------|-------|-------|-------|-------|-------|-------|-------|-------|-------|-------|

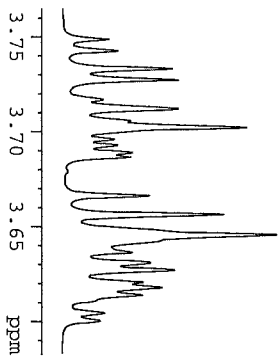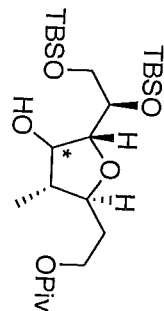

46-minor

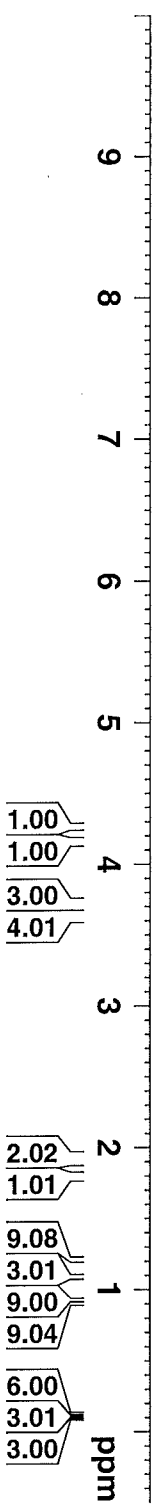

```

NAME          SUM-X-25-Minor Alcohol
EXPNO         1
PROCNO        1
Date_         20110202
Time          13.38
INSTRUM       spect
PROBHD        5 mm CPDCH 13C
PULPROG       zg30
TD            65536
SOLVENT       CDCl3
NS            32
DS            2
SWH           11904.762 Hz
FIDRES       0.181652 Hz
AQ           2.7525620 sec
RG           50.8
DW           42.000 usec
DE           16.50 usec
TE           298.2 K
D1           2.00000000 sec
TD0          1

===== CHANNEL F1 =====
NUC1          1H
P1           9.40 usec
PL1         -3.20 dB
PL1W        33.59817505 W
SFO1        700.1245508 MHz
SI          65536
SF          700.1200000 MHz
WDW          EM
SSB          0
LB          0.30 Hz
GB          0
PC          1.00
  
```

Minor Alcohol

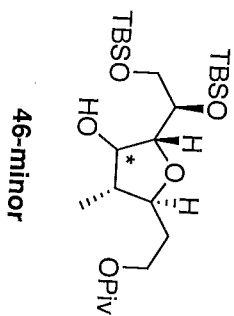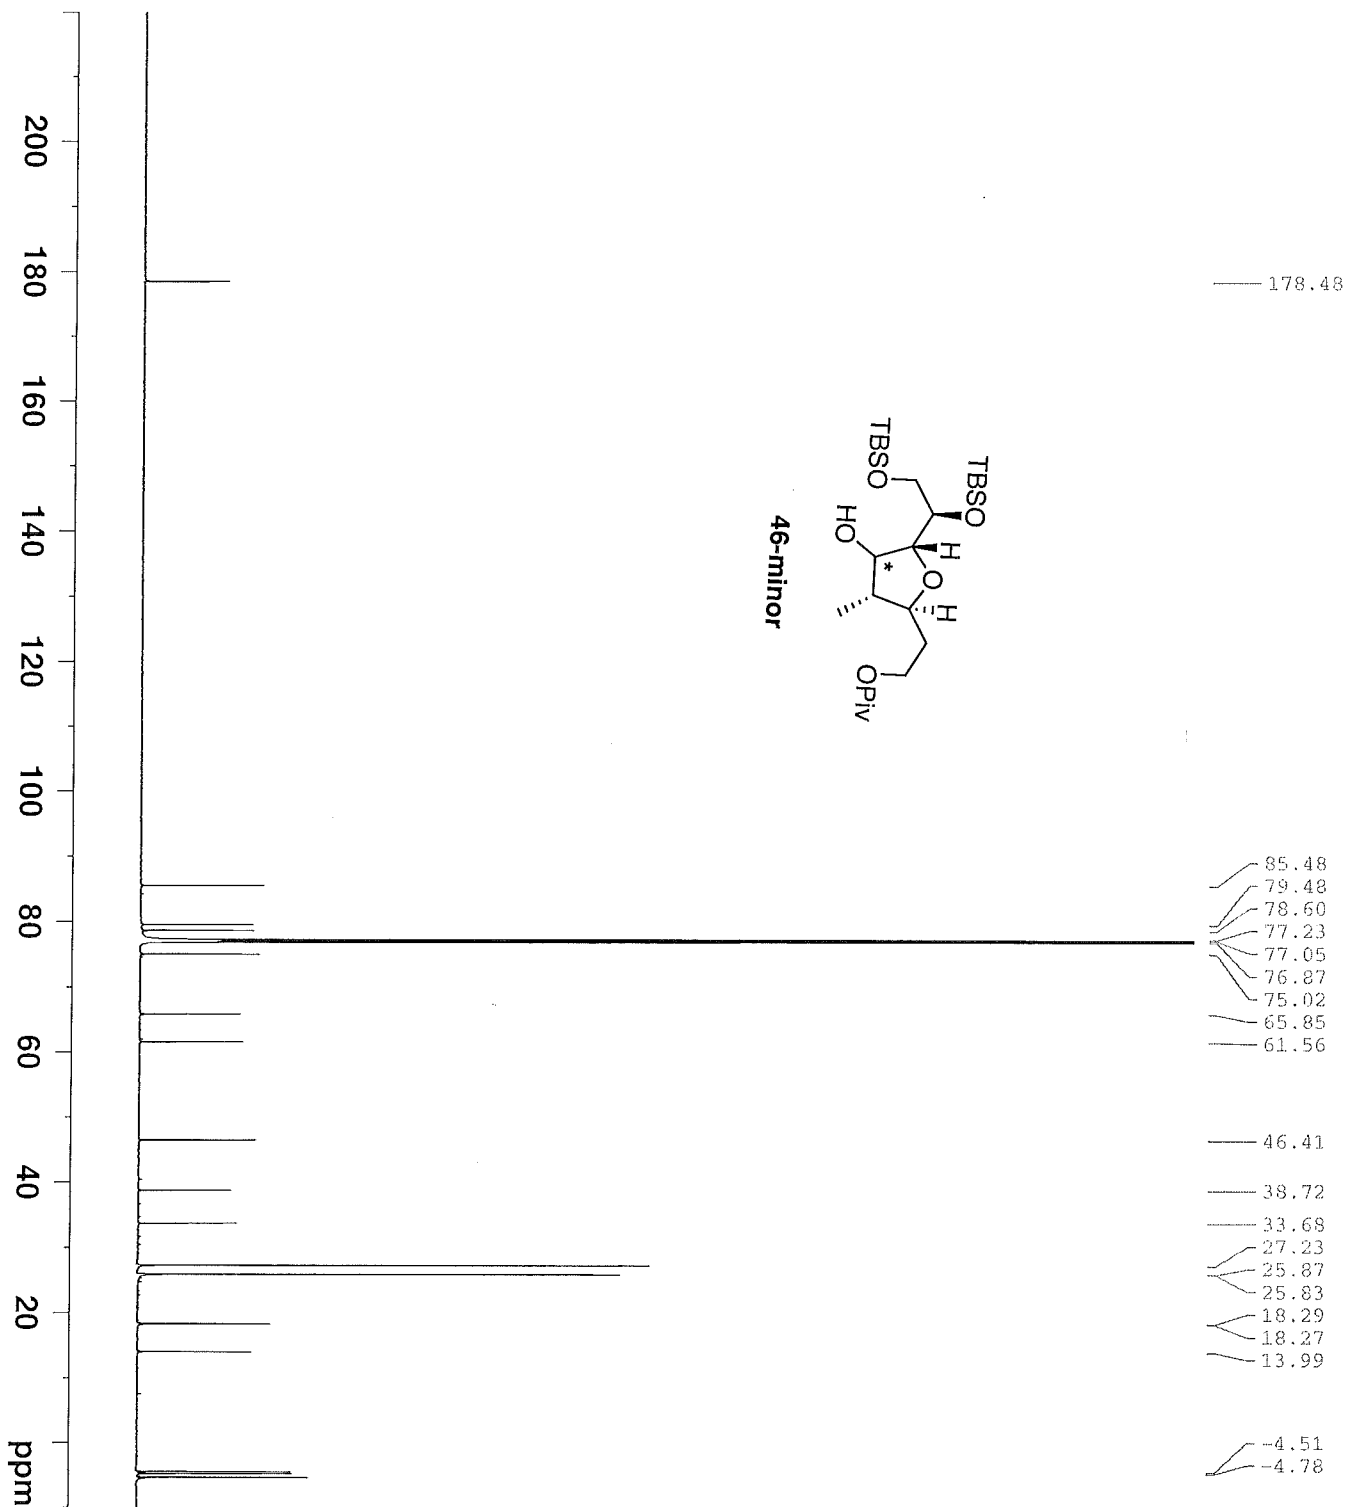

| Chemical Shift (ppm) |
|----------------------|
| 178.48               |
| 85.48                |
| 79.48                |
| 78.60                |
| 77.23                |
| 77.05                |
| 76.87                |
| 75.02                |
| 65.85                |
| 61.56                |
| 46.41                |
| 38.72                |
| 33.68                |
| 27.23                |
| 25.87                |
| 25.83                |
| 18.29                |
| 18.27                |
| 13.99                |
| -4.51                |
| -4.78                |

```

NAME SUM-X-25-Minor Alcohol
EXPNO 2
PROCNO 1
Date_ 20110202
Time 13.54
INSTRUM spect
PROBHD 5 mm CPDCH 13C
PULPROG zgpg30
TD 98304
SOLVENT CDCl3
NS 1253
DS 4
SWH 41666.668 Hz
FIDRES 0.423855 Hz
AQ 1.1796980 sec
RG 203
DM 12.000 usec
DE 15.00 usec
TE 298.2 K
D1 2.0000000 sec
D11 0.0300000 sec
TD0 1

===== CHANNEL f1 =====
NUC1 13C
P1 9.00 usec
PL1 4.50 dB
PL1W 38.14553833 W
SFO1 176.0637988 MHz

===== CHANNEL f2 =====
CPDPRG2 waltz16
NUC2 1H
PCPD2 65.00 usec
PL2 -3.20 dB
PL12 13.60 dB
PL13 120.00 dB
PL12W 33.59817505 W
PL13W 0.70196527 W
SFO2 700.1228005 MHz
SI 131072
SF 176.0453140 MHz
WDW EM
SSB 0
LB 3.00 Hz
GB 0
PC 1.40
  
```



8.336  
7.609  
7.097  
7.095  
6.324  
6.315  
6.307  
4.326  
4.315  
4.310  
4.298  
4.255  
4.240  
4.234  
4.228  
4.220  
4.213  
4.207  
3.880  
3.863  
3.856  
3.839  
3.832  
3.826  
3.821  
3.814  
3.806  
3.801  
3.795  
3.611  
3.605  
3.584  
3.578  
3.509  
3.498  
3.482  
3.471  
2.349  
2.340  
2.332  
1.961  
1.799  
1.784  
1.718  
1.271  
0.956  
0.892

Current Data Parameters  
NAME SUM-VII-13-rhioa  
EXPNO 3  
PROCNO 1

F2 - Acquisition Parameter:  
Date\_ 20100515  
Time 22.17  
INSTRUM DPX400  
PROBHD 5 mm BBO BB-1H  
PULPROG zg30  
TD 32768  
SOLVENT CDC13  
NS 32  
DS 2  
SWH 6410.256 H  
FIDRES 0.195625 H  
AQ 2.5559540 s  
RG 114  
DW 78.000 u  
DE 6.00 u  
TE 299.2 K  
D1 1.00000000 s  
TD0 1

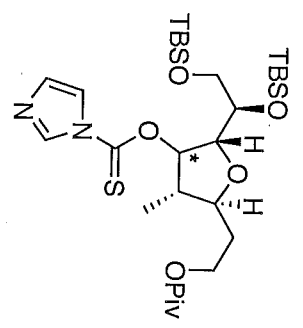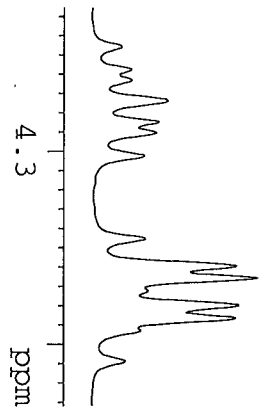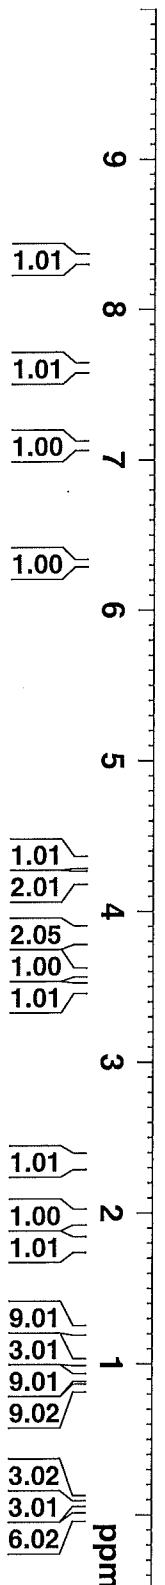

==== CHANNEL f1 =====  
NUC1 1H  
P1 13.50 u  
PL1 -3.00 d  
SF01 400.2478017 M  
F2 - Processing parameter:  
SI 32768  
SF 400.2450000 M  
WDW EM  
SSB 0  
LB 0.30 H  
GB 0  
PC 1.00

Thioate (Major Isomer)

|        |        |        |        |        |       |       |       |       |       |       |       |       |       |       |       |       |       |       |       |       |       |       |      |      |      |
|--------|--------|--------|--------|--------|-------|-------|-------|-------|-------|-------|-------|-------|-------|-------|-------|-------|-------|-------|-------|-------|-------|-------|------|------|------|
| 183.47 | 178.31 | 136.75 | 131.24 | 117.63 | 85.80 | 82.22 | 79.99 | 77.34 | 77.02 | 76.70 | 73.38 | 65.96 | 61.48 | 45.57 | 38.74 | 33.33 | 27.20 | 25.92 | 25.85 | 18.40 | 18.34 | 10.55 | 4.48 | 4.64 | 5.48 |
|--------|--------|--------|--------|--------|-------|-------|-------|-------|-------|-------|-------|-------|-------|-------|-------|-------|-------|-------|-------|-------|-------|-------|------|------|------|

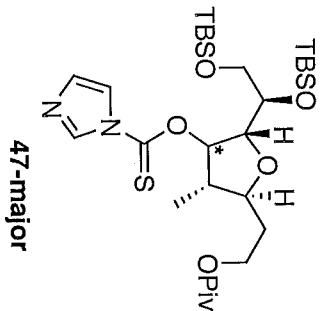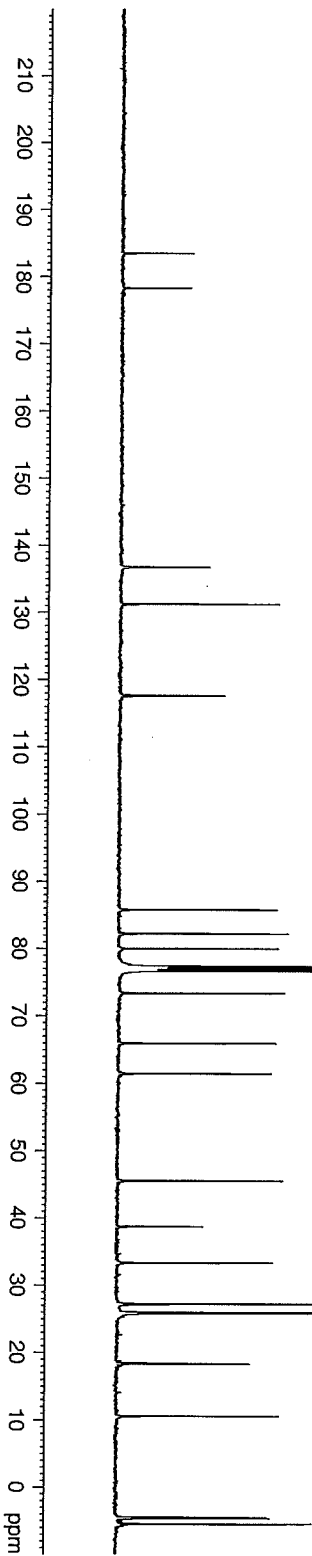

```

Current Data Parameters
NAME          STM-VII-13-Thioate
EXPNO         5
PROCNO        1
DU             /m
SUBNAM        Subnam
USER          USER

F2 - Acquisition Parameters
Date_         20100515
Time          22.34
INSTRUM       DEX400
PROBHD        5 mm BBO BB-1H
PULPROG       zgpg30
TD            65536
SOLVENT       CDCl3
NS            10240
DS            4
SFE           23980.814 Hz
FIDRES        0.365918 Hz
AQ            1.366475 sec
RG            1.206425
DM            20.850 usec
DE            6.00 usec
TE            299.2 K
D1            2.00000000 sec
d11           0.03000000 sec
DELTA         1.89999998 sec
TD0           1

===== CHANNEL f1 =====
NUC1          13C
P1            8.30 usec
PL1          -3.00 dB
SFO1         100.6521517 MHz

===== CHANNEL f2 =====
CPDPRG2       waltz16
NUC2          1H
PCPD2        90.00 usec
PL2          -3.00 dB
PL12         15.00 dB
PL13         15.00 dB
SFO2         400.2466010 MHz

F2 - Processing parameters
SI            32768
SF            100.6416850 MHz
WDW           EM
SSB           0
LB            3.00 Hz
GB            0
PC            1.40
  
```

8.400  
7.686  
7.539  
7.330  
7.114  
7.112  
7.016  
2.304  
2.217  
2.007  
1.998  
1.841  
1.819  
1.417  
1.361  
1.354  
1.342  
1.328  
1.311  
1.302  
1.269  
1.252  
1.169  
1.161  
1.131  
1.119  
1.103  
1.069  
1.042  
1.031  
1.015  
0.976  
0.835  
0.826  
0.769  
0.756  
0.719  
0.324  
0.280  
0.214  
0.200  
0.028  
0.018  
0.003  
0.01  
0.08  
0.09

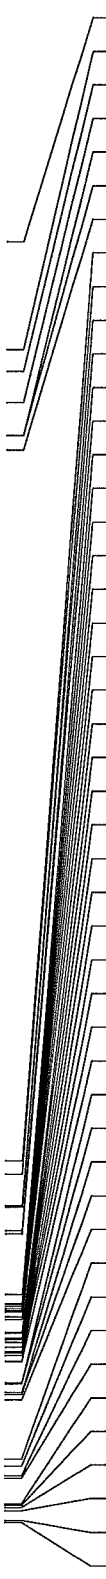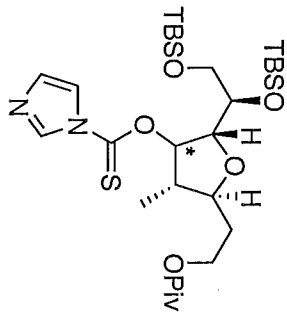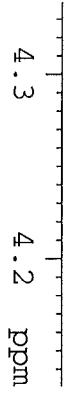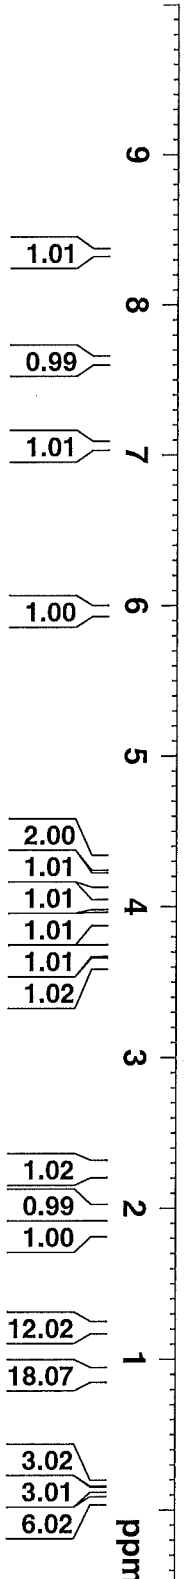

Current Data Parameters  
 Name: SUM-VII-13-rhioa  
 ExpNo: 1  
 ProcNo: 1

F2 - Acquisition Parameters:  
 Date\_: 20100515  
 Time: 16.50  
 Instrum: DPX400  
 Probid: 5 mm BBO BB-1H  
 PulpProg: zg30  
 Td: 32768  
 Solvent: CDCl3  
 NS: 32  
 DS: 2  
 SWH: 6410.256 H  
 FIDRES: 0.195625 H  
 AO: 2.5559540 s  
 RG: 143.7  
 DW: 78.000 u  
 DE: 6.00 u  
 TE: 298.2 K  
 D1: 1.00000000 s  
 TD0: 1

==== CHANNEL f1 =====  
 NUC1: 1H  
 P1: 13.50 u  
 PL1: -3.00 d  
 SFO1: 400.2478017 M

F2 - Processing parameters:  
 SI: 32768  
 SF: 400.2450000 M  
 WDW: EM  
 SSB: 0  
 LB: 0.30 H  
 GB: 0  
 PC: 1.00

Thioate (Minor Isomer)

|        |
|--------|
| 183.97 |
| 178.45 |
| 136.94 |
| 130.96 |
| 117.95 |
| 90.75  |
| 82.18  |
| 81.97  |
| 77.34  |
| 77.02  |
| 76.70  |
| 74.59  |
| 63.98  |
| 61.48  |
| 46.72  |
| 38.70  |
| 33.22  |
| 27.21  |
| 25.94  |
| 18.37  |
| 18.05  |
| 14.42  |
| 4.14   |
| 4.39   |
| 5.34   |

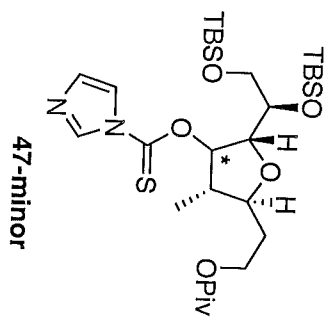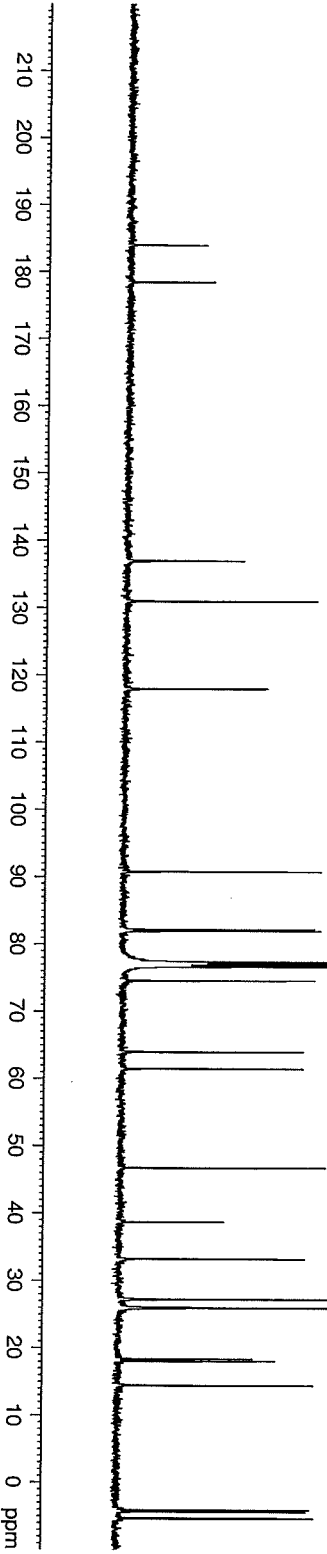

```

Current Data Parameters
NAME      SUM-VII-13-Thioate
EXPNO    2
PROCNO   1
DT       /m
USER     Subham

F2 - Acquisition Parameters
Date_    20100515
Time     17.04
INSTRUM  DPX400
PROBHD   5 mm BBO BB-1H
PULPROG  zgpg30
TD       65536
SOLVENT  CDCl3
NS       5000
DS       4
SWH      23980.814 Hz
FIDRES   0.365918 Hz
AQ       1.3664756 sec
RG       9195.2
DM       20.850 usec
DE       6.00 usec
TE       299.2 K
D1       2.00000000 sec
d11      0.03000000 sec
DELTA    1.89999999 sec
DDO      1

===== CHANNEL f1 =====
NUC1      13C
P1       8.30 usec
PL1      -3.00 dB
SFO1     100.6521517 MHz

===== CHANNEL f2 =====
CEPRG2   waltz16
NUC2      1H
PCPD2    90.00 usec
PL2      -3.00 dB
PL12     15.00 dB
PL13     15.00 dB
SFO2     400.2466010 MHz

F2 - Processing parameters
SI       32768
SF       100.6416850 MHz
WDW      EM
SSB      0
LB       3.00 Hz
GB       0
PC       1.40
    
```

7.281  
4.262  
4.250  
4.244  
4.231  
4.178  
4.161  
4.158  
4.142  
4.034  
4.032  
3.665  
3.655  
3.642  
3.635  
3.594  
3.581  
3.564  
3.558  
3.546  
3.453  
3.446  
2.057  
2.041  
2.027  
1.893  
1.886  
1.696  
1.680  
1.662  
1.538  
1.534  
1.509  
1.505  
1.369  
1.193  
1.025  
1.008  
0.958  
0.955  
0.898  
0.090  
0.084  
0.076  
0.068  
0.064  
0.056

Current Data Parameters  
NAME SUM-VII-17-THF R  
EXPNO 2  
PROCNO 1

F2 - Acquisition Parameters  
Date\_ 20100520  
Time 17.26  
INSTRUM DPX400  
PROBHD 5 mm BBO BB-1H  
PULPROG zg30  
TD 32768  
SOLVENT CDCl3  
NS 32  
DS 2  
SWH 6410.256 H  
FIDRES 0.195625 H  
AQ 2.5559540 s  
RG 71.8  
DW 78.000 u  
DE 6.00 u  
TE 299.2 K  
D1 2.00000000 s  
TD0 1

==== CHANNEL f1 =====  
NUC1 1H  
P1 13.50 u  
PL1 -3.00 d  
SFO1 400.2478017 M

F2 - Processing parameters:  
SI 32768  
SF 400.2450000 M  
WDW EM  
SSB 0  
LB 0.30 H  
GB 0  
PC 1.00

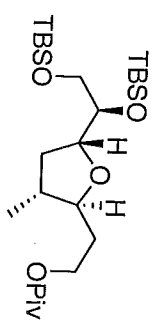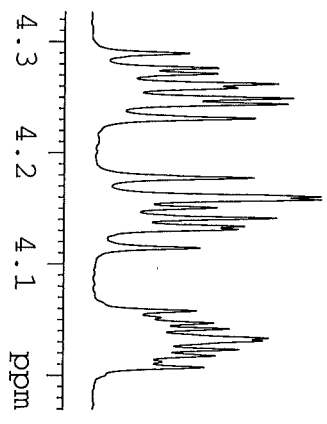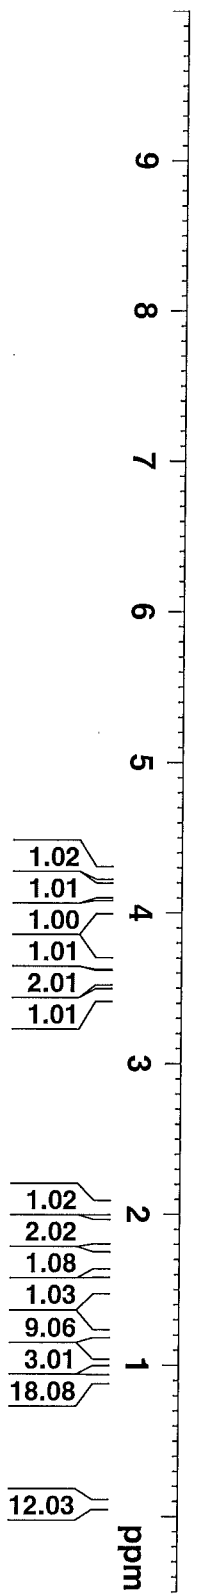

Tetrahydrofuran

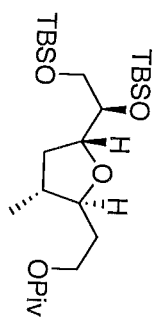

21

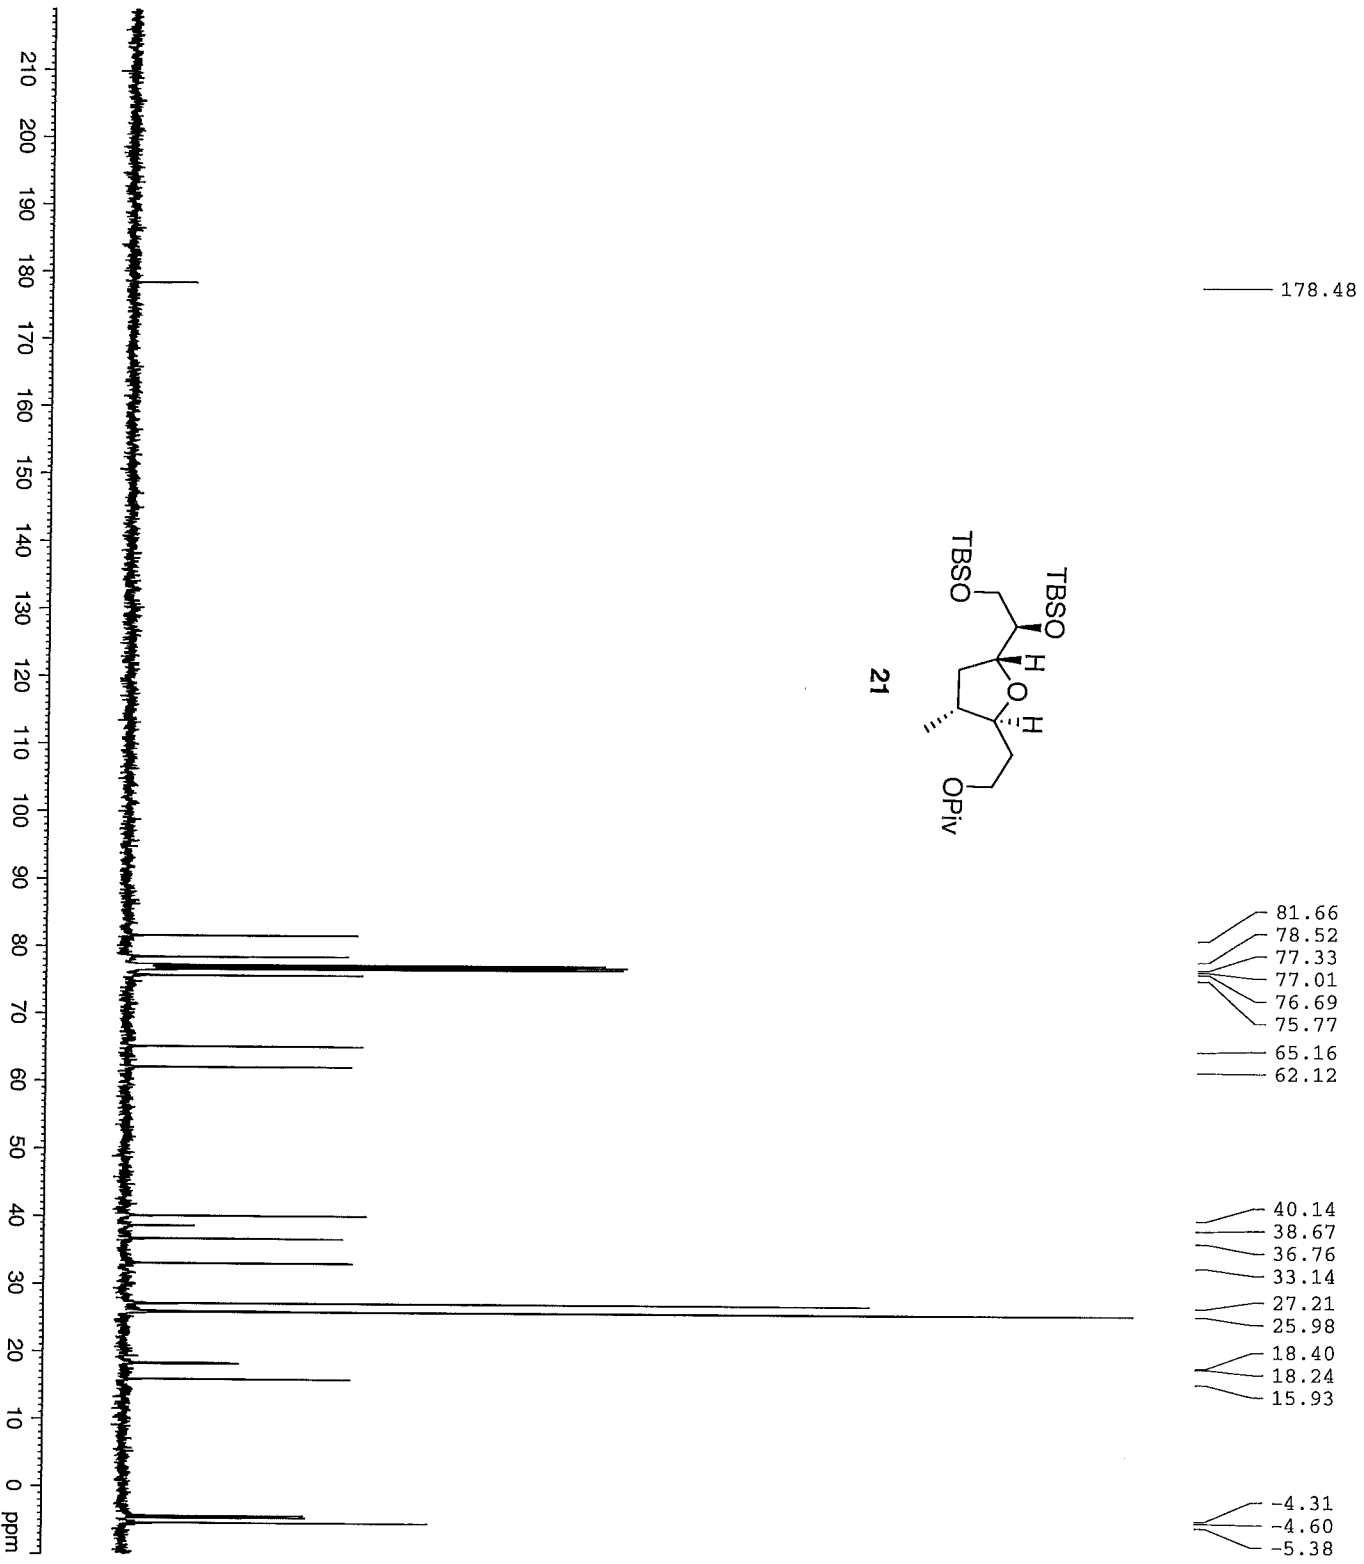

|       |
|-------|
| 81.66 |
| 78.52 |
| 77.33 |
| 77.01 |
| 76.69 |
| 75.77 |
| 65.16 |
| 62.12 |
| 40.14 |
| 38.67 |
| 36.76 |
| 33.14 |
| 27.21 |
| 25.98 |
| 18.40 |
| 18.24 |
| 15.93 |
| 4.31  |
| 4.60  |
| 5.38  |

Current Data Parameters  
 NAME SIM-VII-17-IMP Ring  
 EXPMO 3  
 PROCNO 1  
 DU 1  
 USER Subham

F2 - Acquisition Parameters  
 Date\_ 20100520  
 Time 17.39  
 INSTRM DFX400  
 PROBD 5 mm BBO BB-1H  
 PULPROG zgpg30  
 TD 65536  
 FIDRES 0.365918 Hz  
 AQ 1.3664756 sec  
 RG 18390.4  
 DW 20.850 usec  
 DE 6.00 usec  
 TE 299.2 K  
 D1 0.20000000 sec  
 d11 0.03000000 sec  
 DELTA 0.10000000 sec  
 TDO 1

==== CHANNEL F1 =====  
 NUC1 13C  
 P1 8.30 usec  
 PL1 -3.00 dB  
 SFO1 100.6517495 MHz

==== CHANNEL F2 =====  
 CPDPRG2 waltz16  
 NUC2 1H  
 PCPD2 90.00 usec  
 PL2 -3.00 dB  
 PL12 15.00 dB  
 PL13 15.00 dB  
 SFO2 400.2466010 MHz

F2 - Processing Parameters  
 SI 32768  
 SF 100.6418650 MHz  
 NDMV EX  
 SSB 0  
 TB 3.00 Hz  
 GB 0  
 FC 1.40

Primary alcohol

|       |
|-------|
| 7.290 |
| 4.274 |
| 4.272 |
| 4.267 |
| 4.263 |
| 4.167 |
| 4.158 |
| 4.155 |
| 4.146 |
| 4.142 |
| 4.074 |
| 4.060 |
| 3.675 |
| 3.673 |
| 3.667 |
| 3.567 |
| 3.558 |
| 3.548 |
| 3.500 |
| 3.497 |
| 3.488 |
| 3.484 |
| 3.475 |
| 3.471 |
| 2.395 |
| 2.387 |
| 2.379 |
| 2.101 |
| 2.092 |
| 2.084 |
| 2.075 |
| 1.709 |
| 1.707 |
| 1.700 |
| 1.457 |
| 1.442 |
| 1.440 |
| 1.426 |
| 1.423 |
| 1.409 |
| 1.216 |
| 1.046 |
| 1.037 |
| 0.929 |
| 0.138 |
| 0.120 |

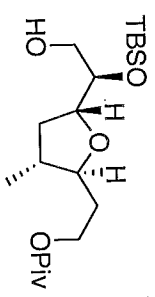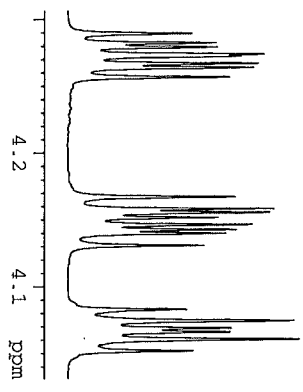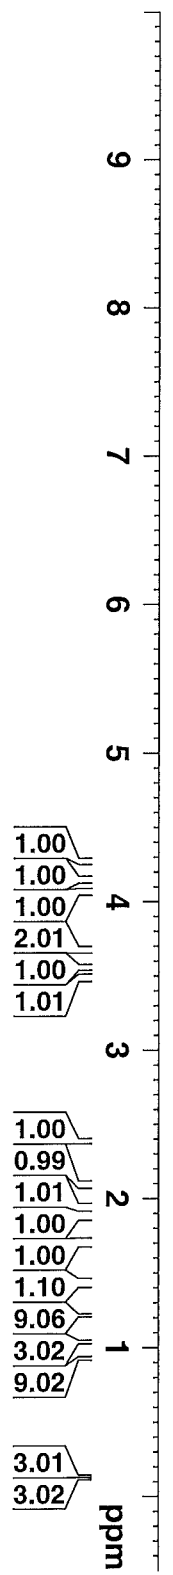

NAME SUM-IX-18-Primary Alcoh  
 EXPNO 1  
 PROCNO 1  
 Date\_ 20110225  
 Time 23:57  
 INSTRUM spect  
 PROHD 5 mm CPDCH 13C  
 PULPROG zg30  
 TD 65536  
 FIDRES 0.181652 Hz  
 DS 2  
 SWH 11904.762 Hz  
 FIDRES 0.181652 Hz  
 AQ 2.7525620 sec  
 RG 57  
 DE 42.000 usec  
 TE 16.50 usec  
 D1 298.2 K  
 TD0 2.00000000 sec  
 1

==== CHANNEL f1 =====  
 NUC1 1H  
 P1 9.40 usec  
 PL1 -3.20 dB  
 PL1W 33.59817505 W  
 SF01 700.1245508 MHz  
 SI 65536  
 SF 700.1200000 MHz  
 WDW EM  
 SSB 0  
 LB 0.30 Hz  
 GB 0  
 PC 1.00

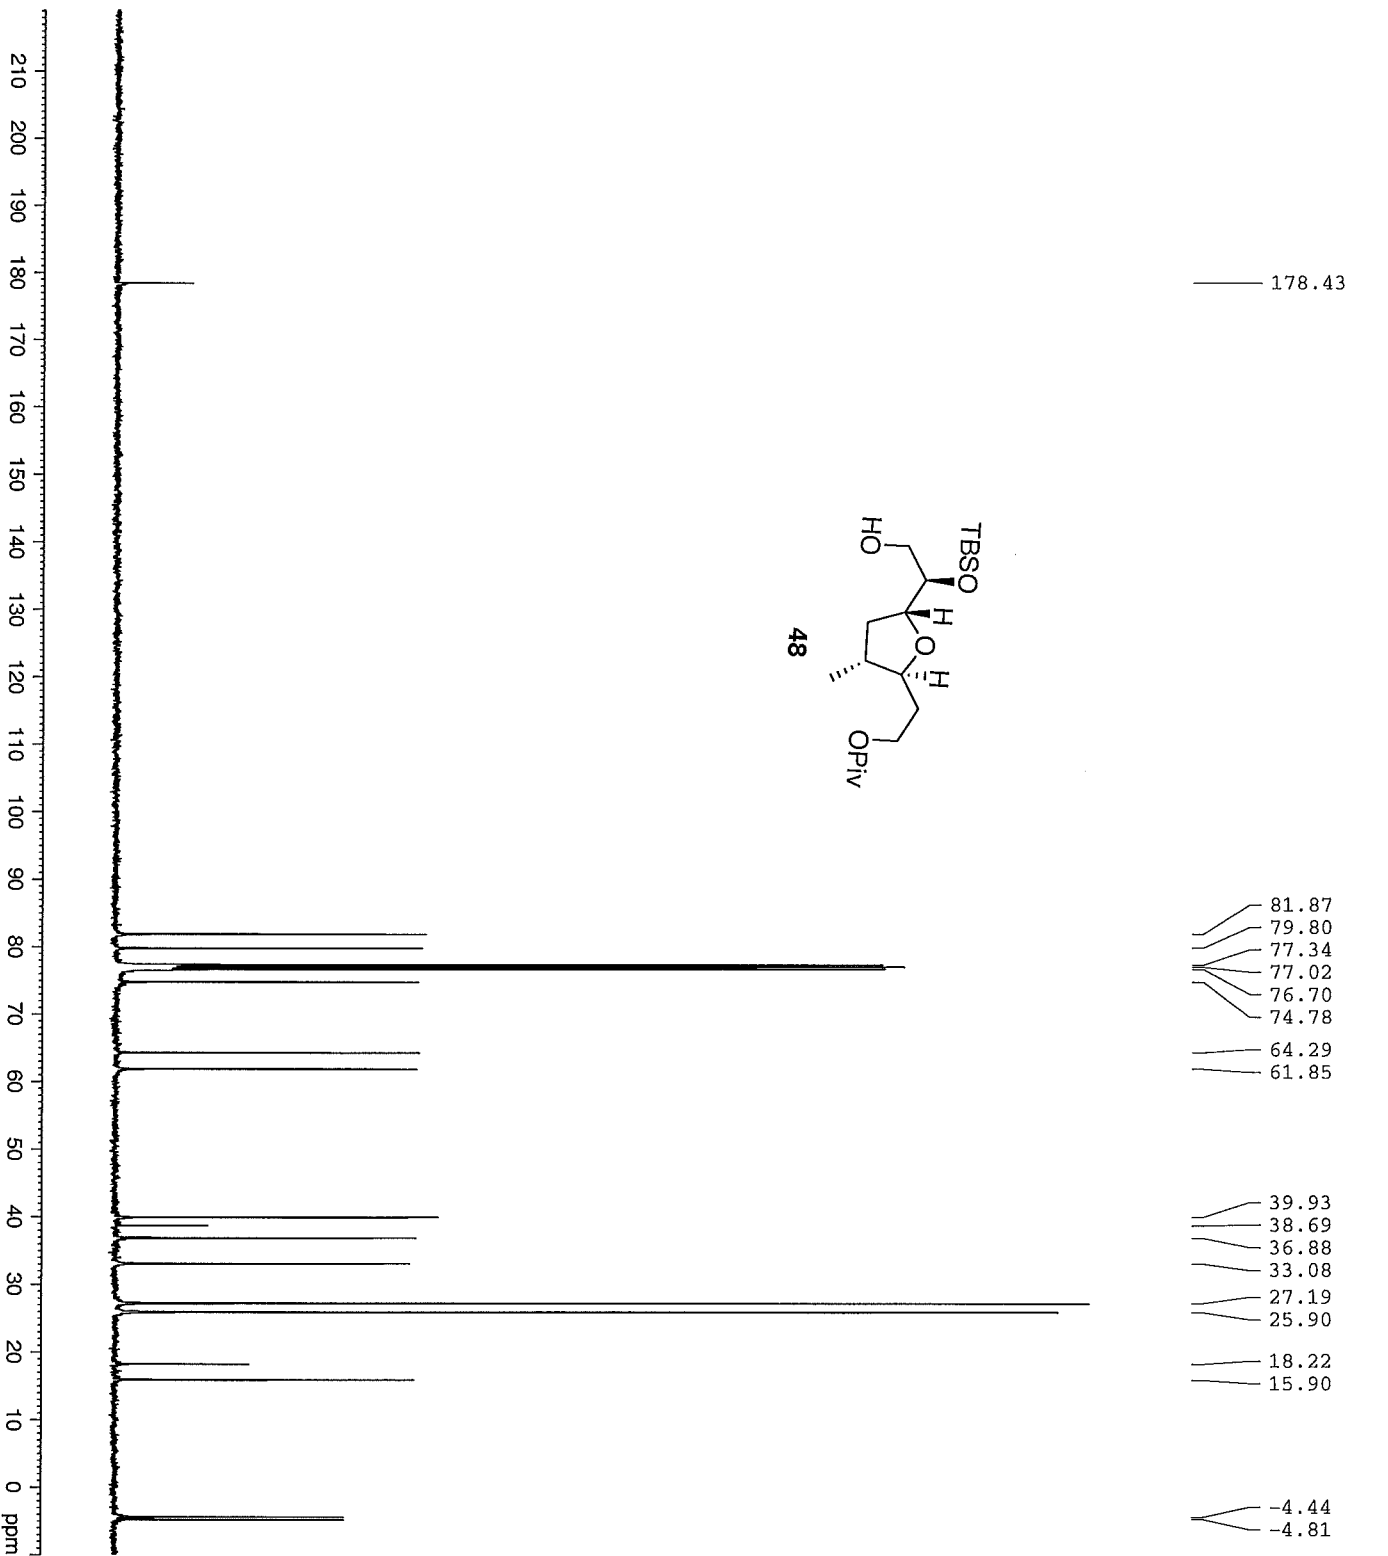

|       |       |      |
|-------|-------|------|
| 81.87 | 39.93 | 4.44 |
| 79.80 | 38.69 | 4.81 |
| 77.34 | 36.88 |      |
| 77.02 | 33.08 |      |
| 76.70 | 27.19 |      |
| 74.78 | 25.90 |      |
| 64.29 | 18.22 |      |
| 61.85 | 15.90 |      |

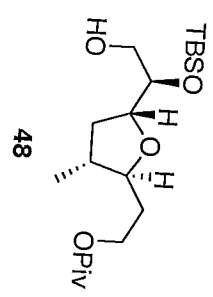

Current Data Parameters  
 NAME SDK-VII-28-Alcohol  
 EXPNO 2  
 PROCNO 1  
 F2 - Acquisition Parameters  
 Date\_ 20100531  
 Time 22.18  
 INSTRUM DPX400  
 PROBHD 5 mm BBO BB-1H  
 PULPROG zgpg30  
 TD 65536  
 SOLVENT CDCl3  
 NS 513  
 DS 4  
 SWH 23380.814 Hz  
 FIDRES 0.365918 Hz  
 AQ 1.3664756 sec  
 RG 9195.2  
 DW 20.850 usec  
 DE 6.00 usec  
 TE 299.2 K  
 D1 0.2000000 sec  
 d11 0.0300000 sec  
 DELTA 0.1000000 sec  
 TD 1  
 ===== CHANNEL f1 =====  
 NUC1 13C  
 P1 8.30 usec  
 PL1 -3.00 dB  
 SFO1 100.6517495 MHz  
 ===== CHANNEL f2 =====  
 CEPRG2 walz16  
 NUC2 1H  
 PCPD2 90.00 usec  
 PL2 -3.00 dB  
 PL12 15.00 dB  
 PL13 15.00 dB  
 SFO2 400.2466010 MHz  
 F2 - Processing parameters  
 SI 32768  
 SF 100.641850 MHz  
 WDW EM  
 SSB 0  
 LB 3.00 Hz  
 GB 0  
 PC 1.40



Aldehyde

9.698  
9.695  
7.291  
4.309  
4.302  
4.296  
4.293  
4.286  
4.279  
4.269  
4.237  
4.224  
4.220  
4.207  
4.162  
4.146  
4.143  
4.126  
4.119  
3.958  
3.955  
3.948  
3.945  
3.531  
3.524  
2.148  
2.135  
2.118  
1.928  
1.922  
1.910  
1.904  
1.892  
1.884  
1.700  
1.684  
1.675  
1.651  
1.645  
1.622  
1.210  
1.053  
1.037  
0.958  
0.112  
0.106

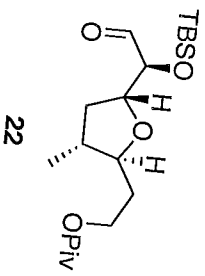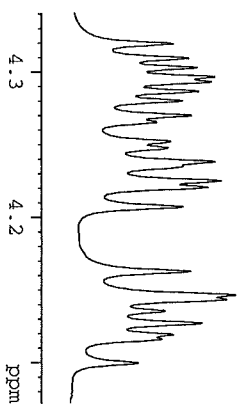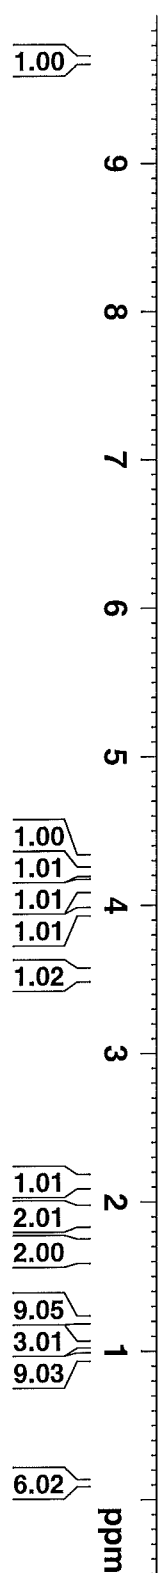

```

NAME SM-V-79-R-Aldehyde
EXPNO 1
PROCNO 1
Date_ 20100108
Time 15.30
INSTRUM spect
PROBHD 5 mm PABBO BB-
PULPROG zg30
TD 32768
SOLVENT CDCl3
NS 32
DS 2
SWH 6410.256 Hz
FIDRES 0.195625 Hz
AQ 2.5559540 sec
RG 64
DE 78.000 usec
TE 299.7 K
D1 1.00000000 sec
TDO 1

===== CHANNEL f1 =====
NUC1 1H
P1 14.00 usec
PL1 0.00 dB
PL1W 10.27361584 W
SFO1 400.1378009 MHz
SI 32768
SF 400.1350000 MHz
WDW EM
SSB 0
LB 0.30 Hz
GB 0
PC 1.00

```

Aldehyde

203.82  
178.50  
82.64  
80.04  
78.57  
61.84  
39.69  
38.70  
36.17  
32.87  
27.20  
25.80  
18.29  
15.74  
4.63  
4.96

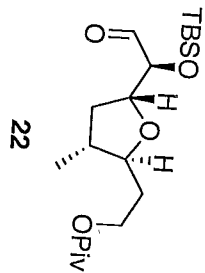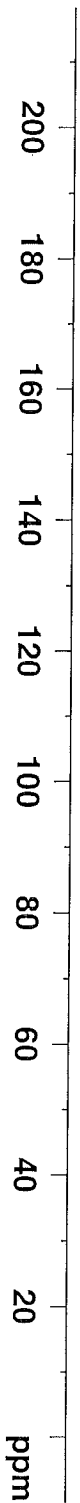

```

NAME          SWH-IX-37-Aldehyde
EXPNO         2
PROCNO        1
Date_         20100930
Time          16.28
INSTRUM       spect
PROBHD        5 mm CPDCH 13C
PULPROG       zgpg30
TD            98304
SOLVENT       CDCl3
NS            235
DS            4
SWH           41666.668 Hz
FIDRES        0.423855 Hz
AQ            1.1796980 sec
RG            203
DE            12.000 usec
TE            297.5 K
D1            2.00000000 sec
D11           0.03000000 sec
TD0           1

===== CHANNEL f1 =====
NUC1          13C
P1            9.00 usec
PL1           4.50 dB
PL1W          38.14553833 W
SF01          176.0629186 MHz

===== CHANNEL f2 =====
CPDPRG2      waltz16
NUC2          1H
PCPD2        65.00 usec
PL2           -3.20 dB
PL12         13.60 dB
PL13         120.00 dB
PL2W         33.59817505 W
PL12W        0.70196527 W
PL13W        0.00000000 W
SFO2          700.1228005 MHz
SI            131072
SF           176.0453140 MHz
WDW           EM
SSB           0
GB            3.00 Hz
PC            1.40
  
```

Eneayne

- 7.290
- 5.406
- 5.405
- 3.653
- 3.647
- 3.645
- 3.643
- 3.639
- 3.637
- 3.636
- 3.630
- 3.473
- 3.466
- 3.459
- 3.451
- 3.436
- 3.426
- 3.421
- 3.412
- 2.530
- 2.524
- 2.520
- 2.514
- 2.510
- 2.504
- 2.500
- 2.494
- 1.946
- 1.944
- 1.085
- 1.075
- 0.911

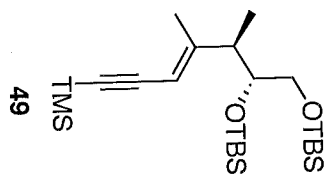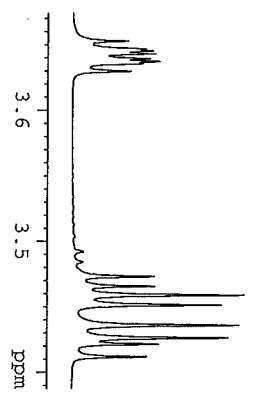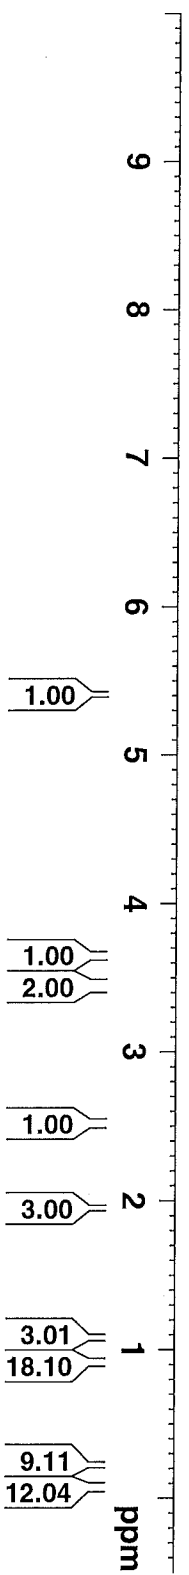

```

NAME SUM-X-56-Eneayne
EXPNO 1
PROCNO 1
Date_ 20110225
Time 15.54
INSTRUM spect
PROBHD 5 mm CPDCH 13C
PULPROG zg30
TD 65536
SOLVENT CDCl3
NS 32
DS 2
SWH 11904.762 Hz
FIDRES 0.181652 Hz
AQ 2.7525620 sec
RG 50.8
DE 42.000 usec
TE 298.2 K
D1 2.00000000 sec
TD0 1

===== CHANNEL f1 =====
NUC1 1H
P1 9.40 usec
PL1 -3.20 dB
PL1W 33.59817505 W
SFO1 700.1245508 MHz
SI 65536
SF 700.1200000 MHz
WDW EM
SSB 0
LB 0.30 Hz
GB 0
PC 1.00
    
```

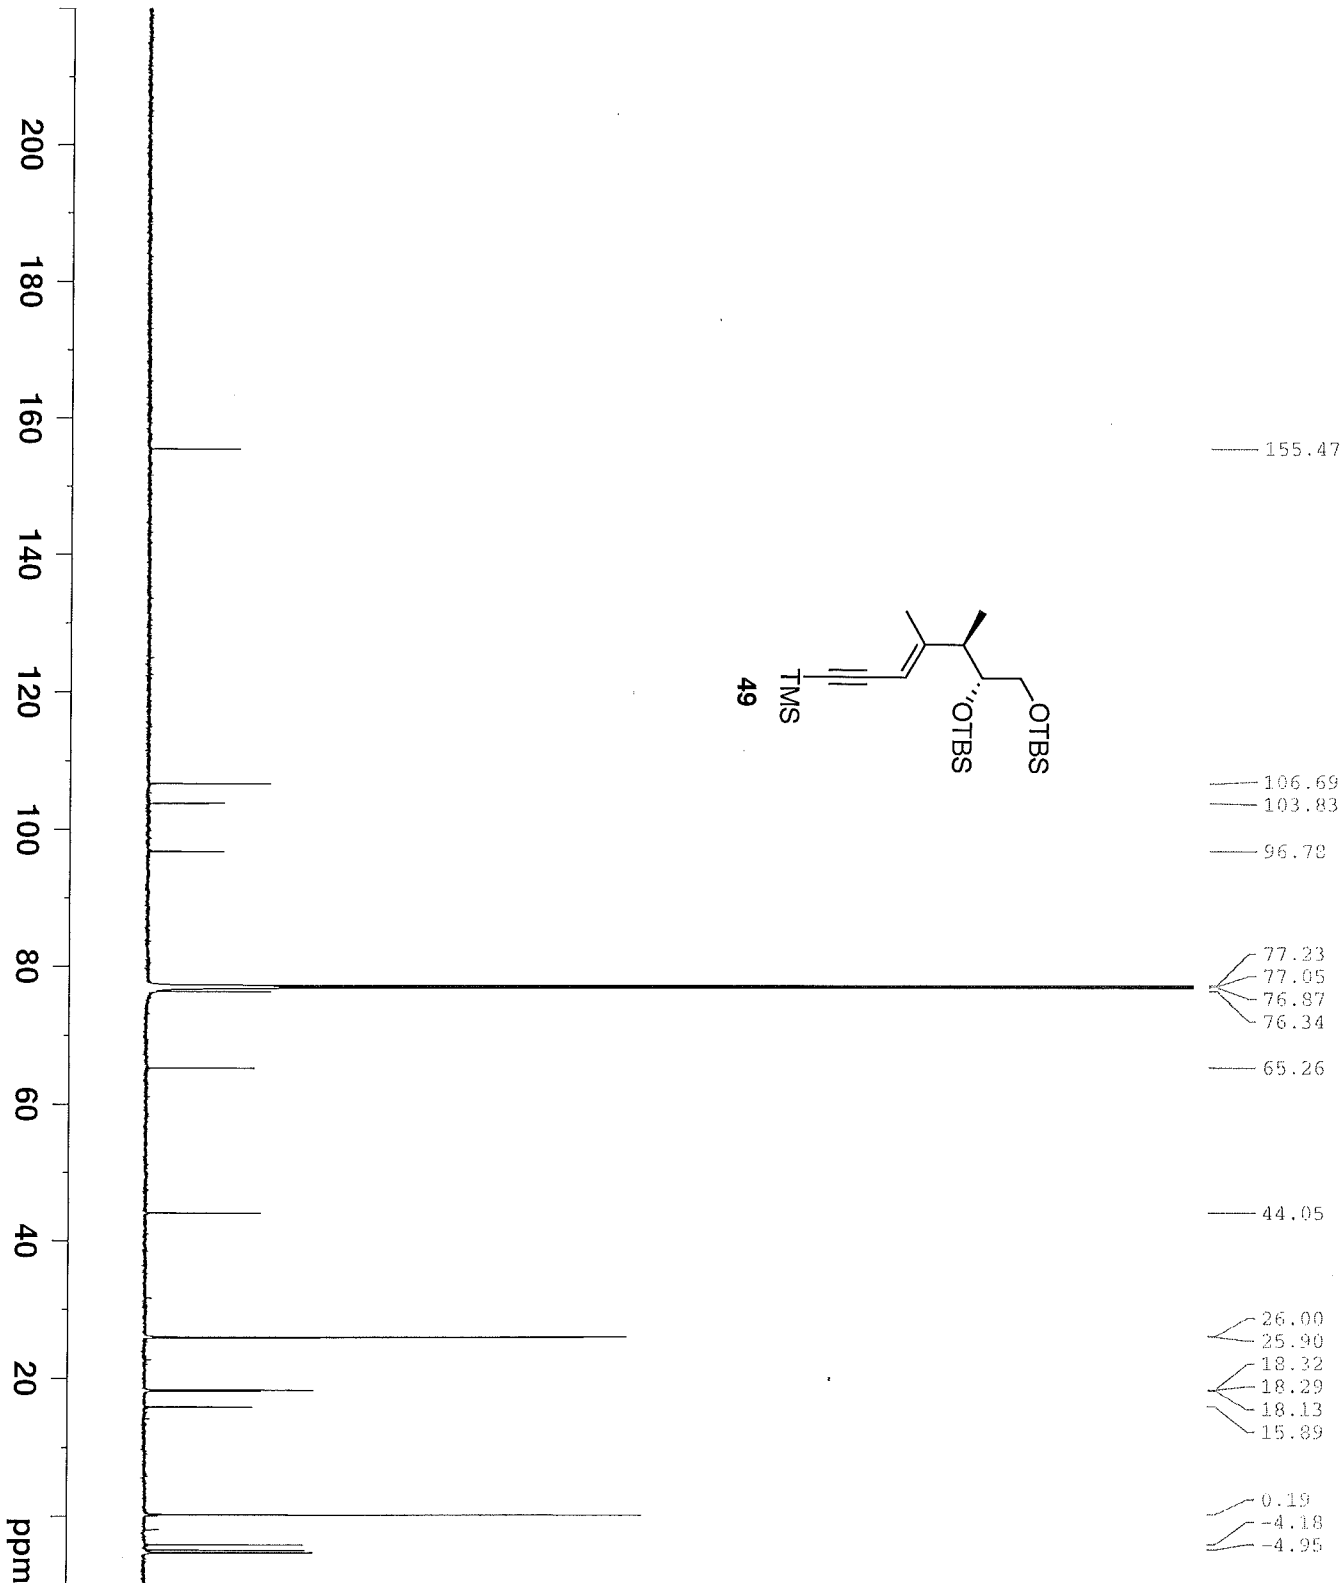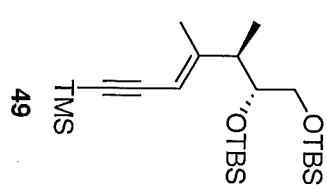

155.47  
 106.69  
 103.83  
 96.78  
 77.23  
 77.05  
 76.87  
 76.34  
 65.26  
 44.05  
 26.00  
 25.90  
 18.32  
 18.29  
 18.13  
 15.89  
 0.19  
 4.18  
 4.95

NAME SUM-X-56-Eneayne  
 EXPNO 2  
 PROCNO 1  
 Date\_ 20110225  
 Time 16.02  
 INSTRUM spect  
 PROBD 5 mm CPDCH 13C  
 PULPROG zgpg30  
 TD 98304  
 SOLVENT CDCl3  
 NS 181  
 DS 4  
 SWH 41666.668 Hz  
 FIDRES 0.423855 Hz  
 AQ 1.1796980 sec  
 RG 203  
 DW 12.000 usec  
 DE 15.00 usec  
 TE 298.2 K  
 D1 2.00000000 sec  
 D11 0.03000000 sec  
 TD0 1

==== CHANNEL F1 =====  
 NUC1 13C  
 P1 9.00 usec  
 PL1 4.50 dB  
 PL1W 38.14553833 W  
 SFO1 176.0637988 MHz

==== CHANNEL F2 =====  
 CPDPRG2 waltz16  
 NUC2 1H  
 PCPD2 65.00 usec  
 PL2 -3.20 dB  
 PL12 13.60 dB  
 PL13 120.00 dB  
 PL12W 33.59817505 W  
 PL12W 0.70196527 W  
 PL13W 0.00000000 W  
 SFO2 700.1228005 MHz  
 SI 131072  
 SF 176.0453140 MHz  
 WDW EM  
 SSB 0  
 LB 3.00 Hz  
 GB 0  
 PC 1.40

- 7.291
- 5.382
- 3.675
- 3.663
- 3.658
- 3.652
- 3.647
- 3.635
- 3.511
- 3.498
- 3.486
- 3.474
- 3.452
- 3.435
- 3.427
- 3.410
- 3.063
- 3.058
- 2.576
- 2.565
- 2.558
- 2.547
- 2.540
- 2.530
- 2.523
- 2.512
- 1.956
- 1.106
- 1.088
- 0.921
- 0.915

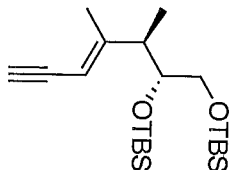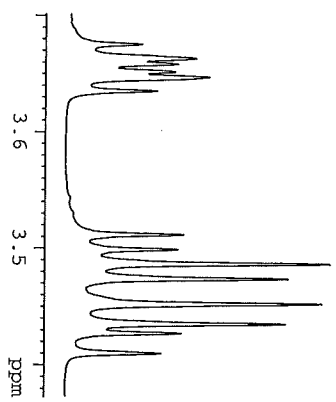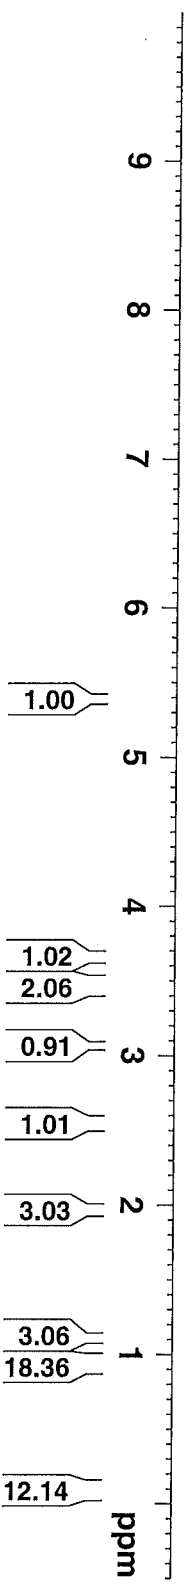

```

NAME          SM-VI-92-R-Alkyne
EXPNO         1
PROCNO        1
Date_         20100502
Time          0.04
INSTRUM       spect
PROBHD        5 mm PABBO BB-
PULPROG       zg30
TD            32768
SOLVENT       CDCl3
NS            32
DS            2
SWH           6410.256 Hz
FIDRES        0.195625 Hz
AQ            2.5559540 se
RG            128
DW            78.000 us
DE            6.50 us
TE            299.4 K
D1            2.00000000 se
TD0           1

===== CHANNEL f1 =====
NUC1          1H
P1            14.00 us
PL1           0.00 dB
PL1W          10.27361584 W
SF01          400.1378009 MHz
SI            32768
SF            400.1350000 MHz
WDW           EM
SSB           0
LB            0.30 Hz
GB            0
PC            1.00
    
```

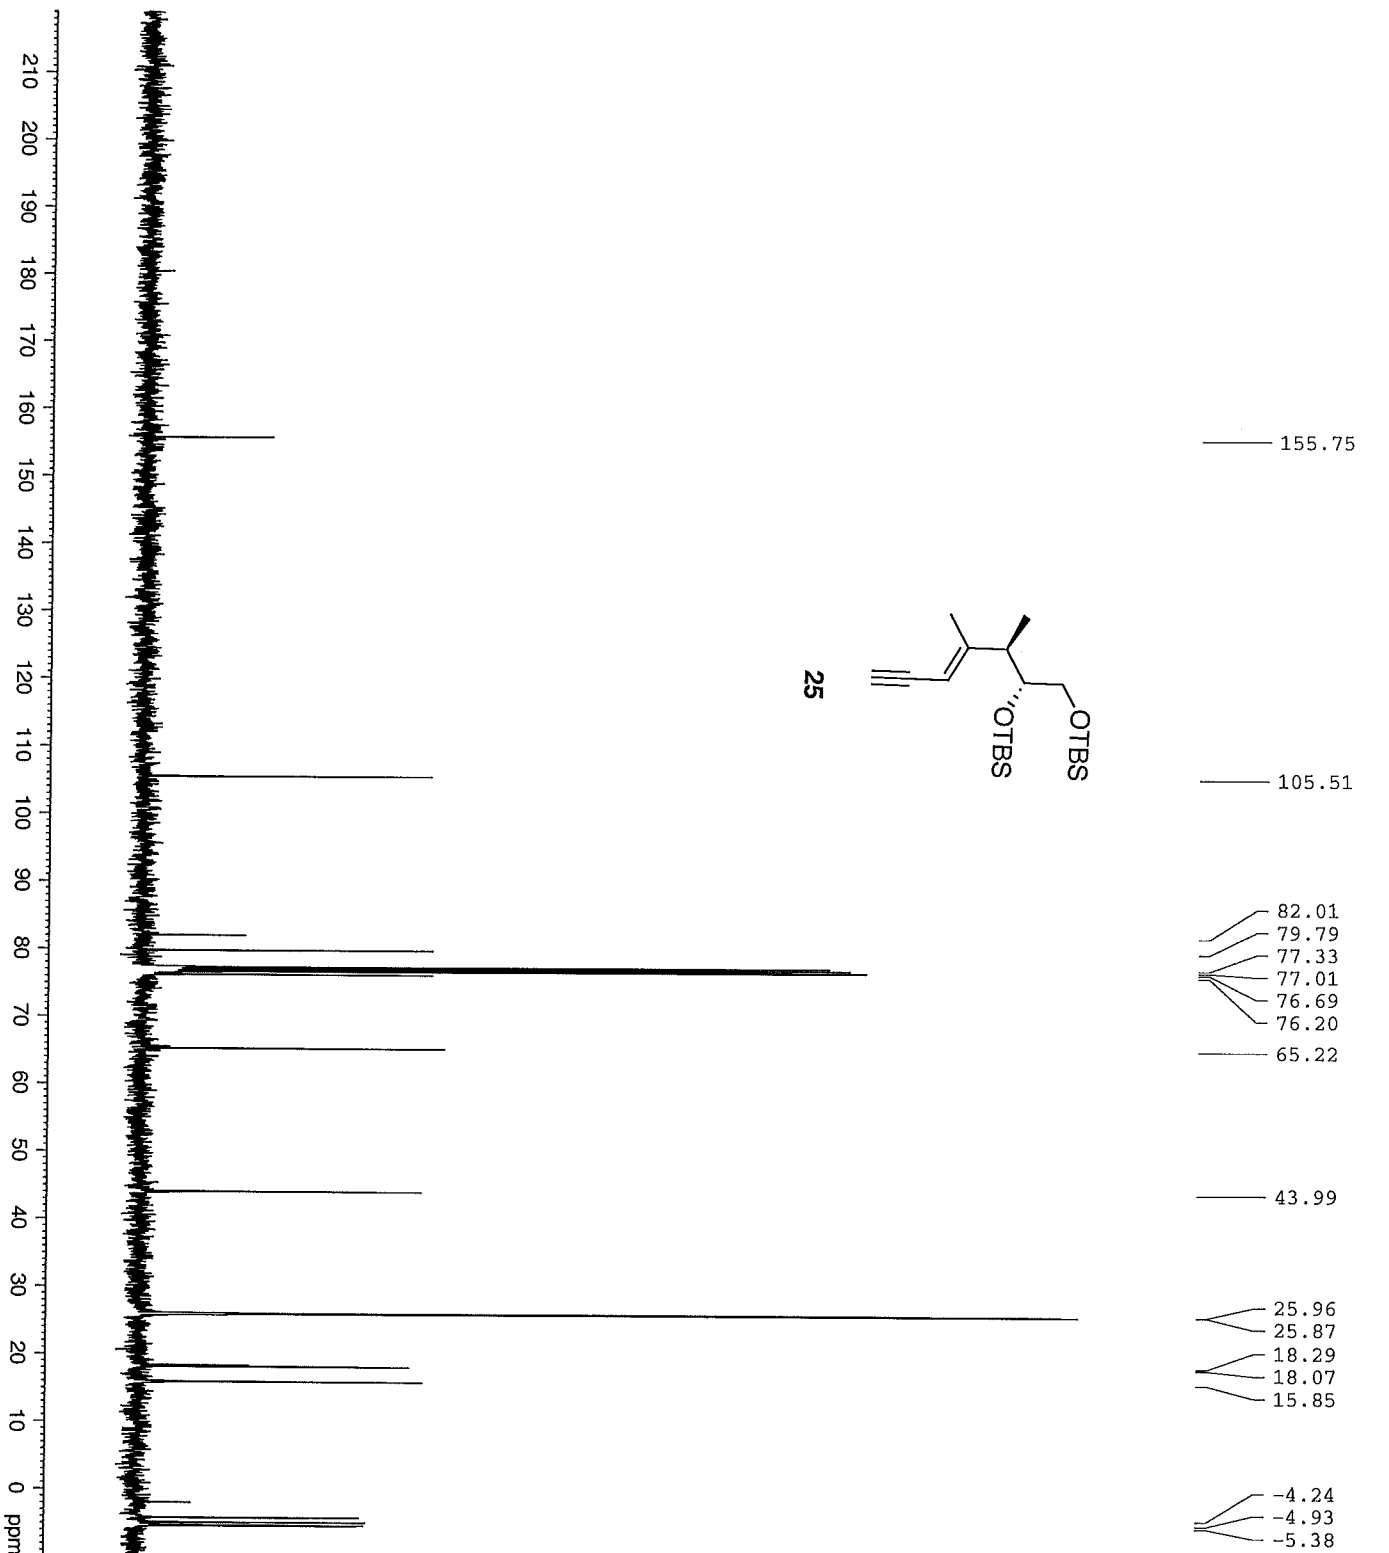

| Chemical Shift (ppm) | Integration |
|----------------------|-------------|
| 15.85                | 1.00        |
| 18.07                | 1.00        |
| 18.29                | 1.00        |
| 25.87                | 1.00        |
| 25.96                | 1.00        |
| 4.24                 | 1.00        |
| 4.93                 | 1.00        |
| 65.22                | 1.00        |
| 76.20                | 1.00        |
| 77.01                | 1.00        |
| 77.33                | 1.00        |
| 79.79                | 1.00        |
| 82.01                | 1.00        |
| 105.51               | 1.00        |
| 155.75               | 1.00        |

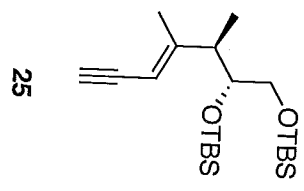

```

Current Data Parameters
NAME      SUM-VII-31-EneYne
EXPNO    2
PROCNO   1
DT       /m
USER     Subham

F2 - Acquisition Parameters
Date_    20100601
Time     1:32
INSTRUM  DRK400
PROBHD   5 mm BBO BB-1H
PULPROG  zgpg30
TD        65536
SOLVENT  CDCl3
NS        322
DS        4
SWH       23980.814 Hz
FIDRES    0.365918 Hz
AQ        1.3664756 sec
RG        919.5, 2
DW        20.850 usec
DE        6.00 usec
TE        300.2 K
D1        0.20000000 sec
d11       0.03000000 sec
DELTA    0.10000000 sec
TD0       1

===== CHANNEL f1 =====
NUC1      13C
P1        8.30 usec
PL1       -3.00 dB
SFO1     100.6517495 MHz

===== CHANNEL f2 =====
CPDPRG2   waitz16
NUC2      1H
P2        90.00 usec
PL2       -3.00 dB
PL12      15.00 dB
PL13      15.00 dB
SFO2     400.2466010 MHz

F2 - Processing parameters
SI        32768
SF        100.6416950 MHz
WDW       EM
SSB       0
GB        0
PC        1.40
    
```

Dienyl Vinyl Stannane

- 7.292
- 5.954
- 5.654
- 5.650
- 5.646
- 5.333
- 5.330
- 5.324
- 5.321
- 3.695
- 3.685
- 3.533
- 3.519
- 3.494
- 3.479
- 1.713
- 1.710
- 1.564
- 1.561
- 1.546
- 1.526
- 1.519
- 1.507
- 1.501
- 1.487
- 1.466
- 1.385
- 1.366
- 1.348
- 1.329
- 1.311
- 1.293
- 1.107
- 1.089
- 0.951
- 0.937
- 0.929
- 0.922
- 0.919
- 0.911
- 0.900
- 0.099
- 0.094
- 0.063

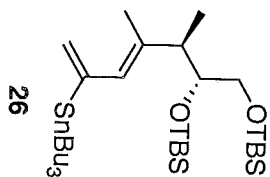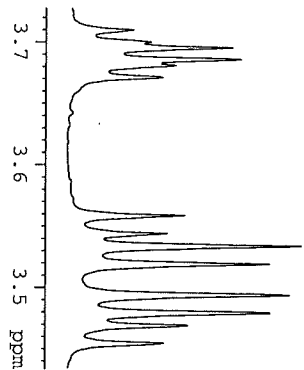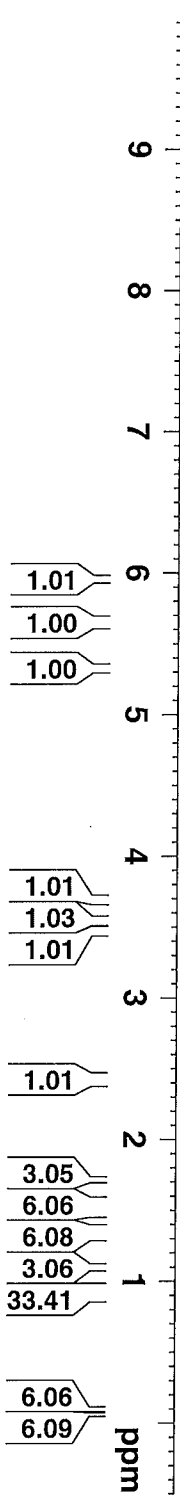

```

NAME          SM-VII-18-R-Vinyl Stanna
EXPNO         1
PROCNO        1
Date_         20100518
Time          18.11
INSTRUM       spect
PROBHD        5 mm PABBO BB-
PULPROG       zg30
TD            32768
SOLVENTN1     CDCl3
NS            32
DS            2
SWH           6410.256 Hz
FIDRES        0.195625 Hz
AQ            2.5559540 sec
RG            128
KW            78.000 usec
DE            6.50 usec
TE            299.0 K
D1            2.00000000 sec
TD0           1

===== CHANNEL f1 =====
NUC1          1H
P1            14.00 usec
PI1           0.00 dB
PR1W         10.27361584 W
SFO1         400.1378009 MHz
SI           32768
SF           400.1350000 MHz
WDW          EM
SSB          0
LB           0.30 Hz
GB           0
PC           1.00
  
```

Diethyl Vinyl Stannane

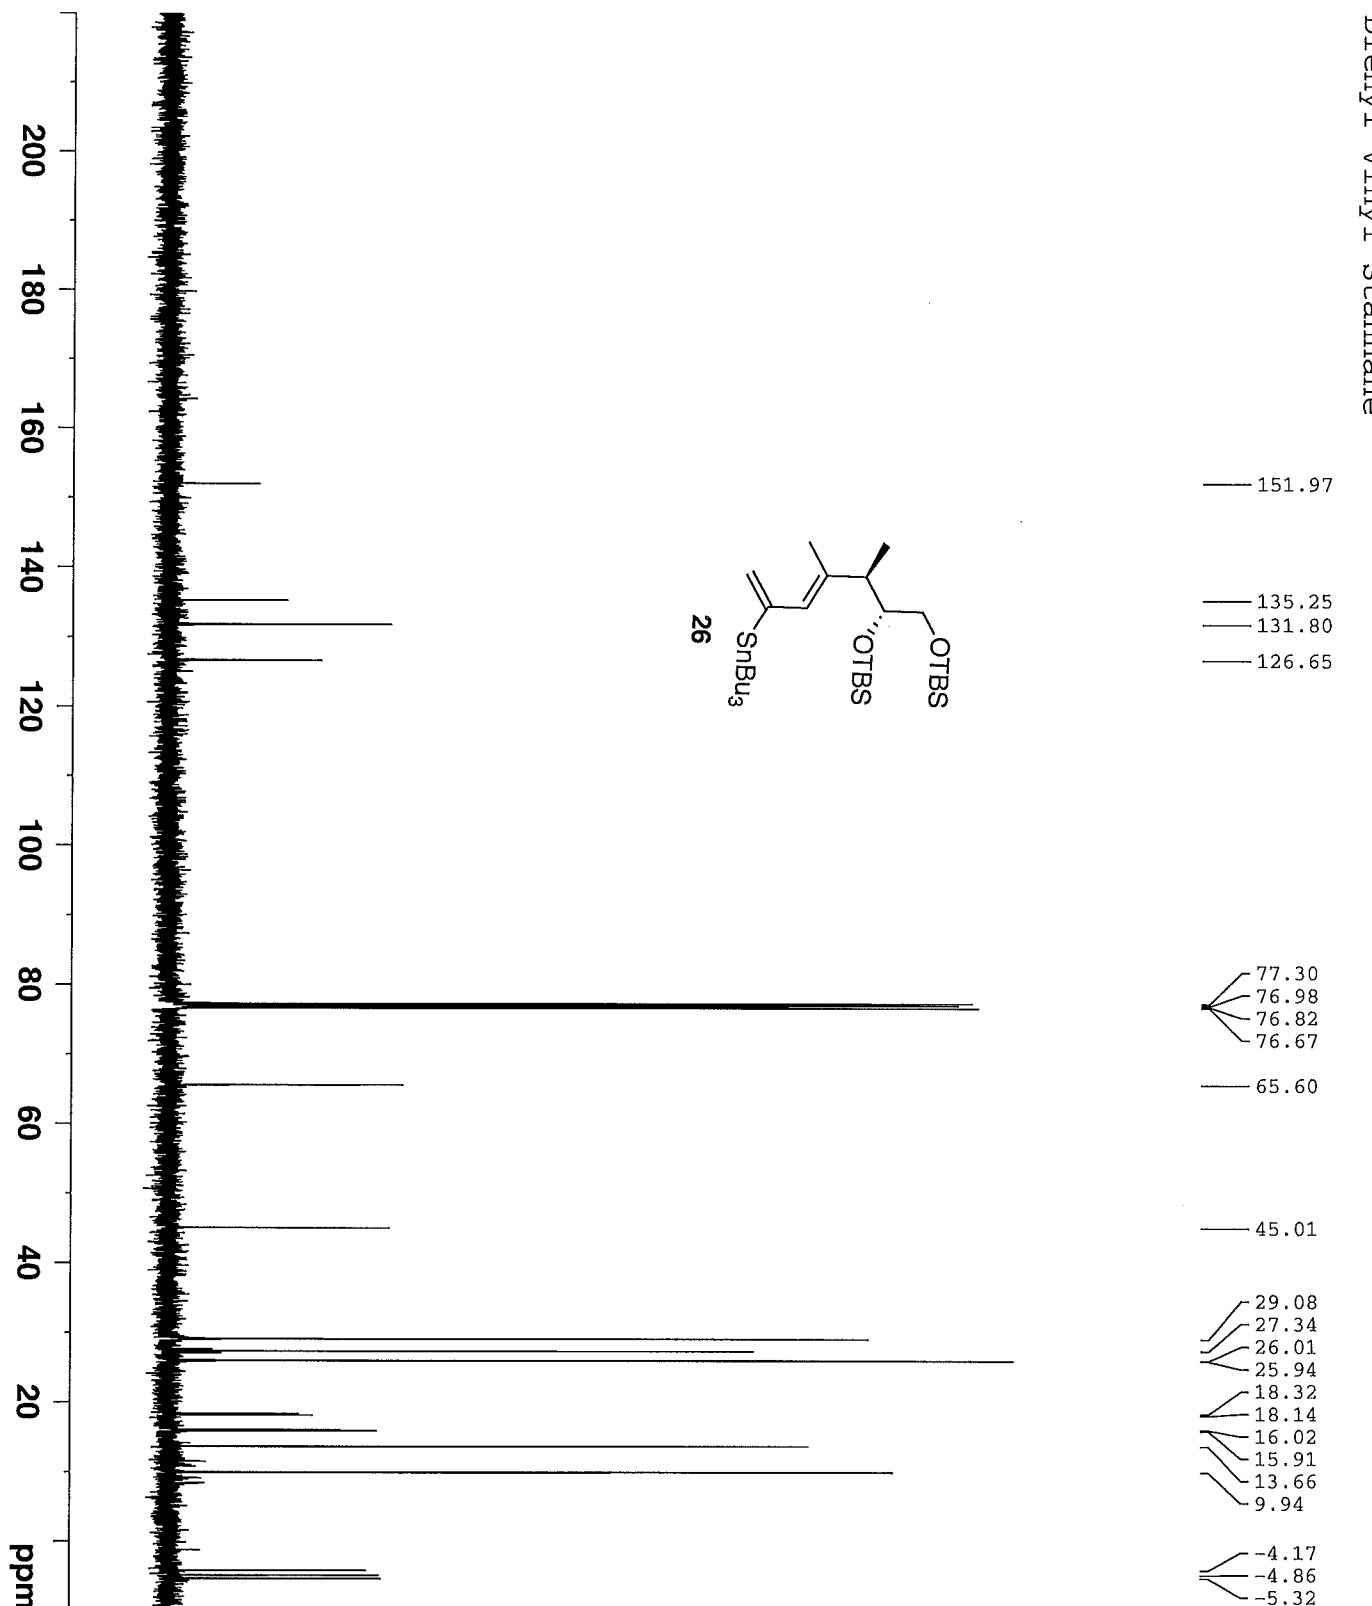

- 151.97
- 135.25
- 131.80
- 126.65
- 77.30
- 76.98
- 76.82
- 76.67
- 65.60
- 45.01
- 29.08
- 27.34
- 26.01
- 25.94
- 18.32
- 18.14
- 16.02
- 15.91
- 13.66
- 9.94
- 4.17
- 4.86
- 5.32

```

NAME          SM-VII-76-R-Vinyl Stan
EXPNO         3
PROCNO        1
Date_         20100801
Time_         18.13
INSTRUM       robinson
PROBHD        5 mm PABBO BB-
PULPROG       zgpg30
TD            65536
SOLVENT       CDCl3
NS            438
DS            4
SWH           23980.814 Hz
FIDRES        0.365918 Hz
AQ            1.3664756 sec
RG            9195.2
DW            20.850 usec
DE            6.50 usec
TE            301.6 K
D1            0.20000000 sec
D11           0.03000000 sec
TD0           1

===== CHANNEL f1 =====
NUC1          13C
P1            9.00 usec
PL1           -2.00 dB
SFO1         100.6258476 MHz

===== CHANNEL f2 =====
CPDPRG2      waltz16
NUC2          1H
PCPD2        90.00 usec
PL2           0.00 dB
PL12         16.16 dB
PL13         17.00 dB
SFO2         400.1416006 MHz
SI           32768
SF           100.6152830 MHz
WDW          EM
SSB           0
LB            1.00 Hz
GB            0
PC            1.40
    
```





Di-enyl Vinyl Iodide

|        |   |
|--------|---|
| 142.21 | — |
| 131.17 | — |
| 127.44 | — |
| 104.07 | — |
| 77.33  | — |
| 77.01  | — |
| 76.69  | — |
| 76.57  | — |
| 65.29  | — |
| 44.16  | — |
| 26.02  | — |
| 25.93  | — |
| 18.34  | — |
| 18.12  | — |
| 16.24  | — |
| 15.70  | — |
| 4.17   | — |
| 4.85   | — |

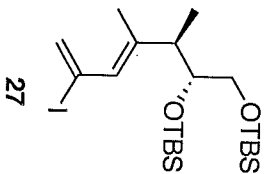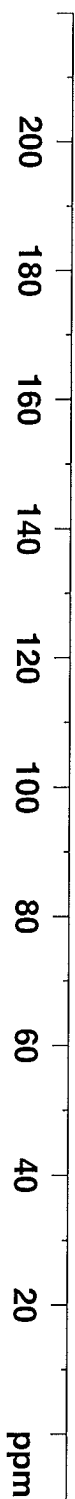

```

NAME SM-VI-95-R-Di-enyl Vinyl Iodide
EXPNO 1
PROCNO 3
Date_ 20100502
Time 23.02
INSTRUM spect
PROBHD 5 mm PABBO BB-
PULPROG zgpg30
TD 65536
SOLVENT CDCl3
NS 3000
DS 4
SWH 25125.629 Hz
FIDRES 0.383387 Hz
AQ 1.3042164 sec
RG 18390.4
DM 19.906 usec
DE 6.59 usec
TE 300.3 K
D1 2.00000000 sec
D11 0.03000000 sec
TD0 1

===== CHANNEL f1 =====
NUC1 13C
P1 9.00 usec
PL1 -2.00 dB
PL1W 46.89702606 W
SFO1 100.6255968 MHz

===== CHANNEL f2 =====
CPDPRG2 waltz16
NUC2 1H
PCPD2 90.00 usec
PL2 0.00 dB
PL2W 16.16 dB
PL3 17.00 dB
PL3W 17.00 dB
PL12W 10.27361584 W
PL12W 0.24872722 W
PL13W 0.20498357 W
SFO2 400.1365005 MHz
SI 32768
SF 100.6140260 MHz
WDW EM
SSB 0
LB 1.00 Hz
GB 0
PC 1.40
  
```

Alcohol

|       |
|-------|
| 7.290 |
| 5.656 |
| 5.521 |
| 5.046 |
| 4.217 |
| 4.159 |
| 4.156 |
| 4.151 |
| 4.148 |
| 4.143 |
| 4.139 |
| 4.134 |
| 4.132 |
| 4.123 |
| 3.672 |
| 3.666 |
| 3.605 |
| 3.601 |
| 3.597 |
| 3.580 |
| 3.576 |
| 3.467 |
| 3.461 |
| 3.452 |
| 1.990 |
| 1.973 |
| 1.778 |
| 1.776 |
| 1.644 |
| 1.630 |
| 1.617 |
| 1.616 |
| 1.221 |
| 1.084 |
| 1.074 |
| 1.026 |
| 1.016 |
| 0.953 |
| 0.908 |
| 0.904 |
| 0.142 |
| 0.110 |
| 0.087 |
| 0.083 |
| 0.047 |
| 0.040 |

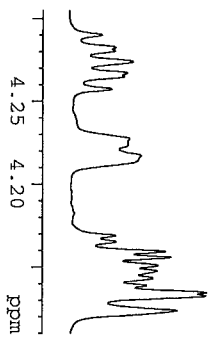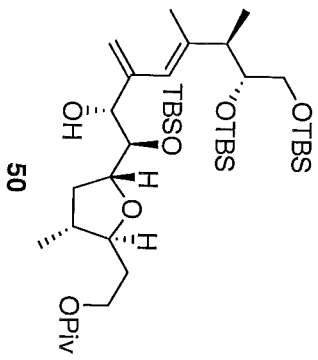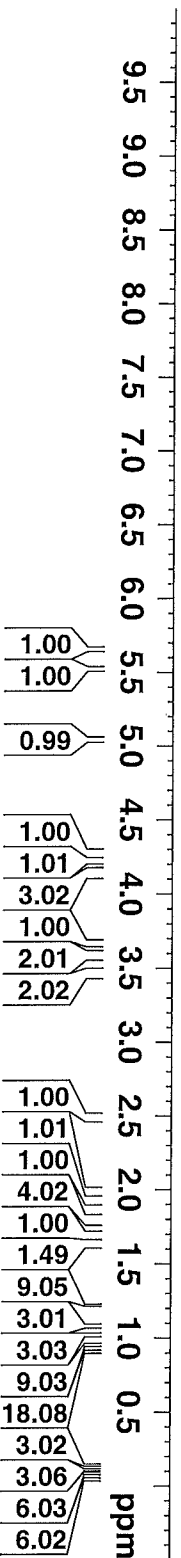

```

NAME          SUM-XII-39-Alcohol
EXPNO         2
PROCNO        1
Date_         20110717
Time          19.00
INSTRUM       spect
PROBHD        5 mm CPDCH 13C
PULPROG       zg30
TD            95236
SOLVENT       CDCl3
NS            32
DS            2
SWH           11904.762 Hz
FIDRES        0.125003 Hz
AQ            3.9999621 sec
RG            57
DE            42.000 us
TE            16.50 us
D1            298.2 K
TD0           1
===== CHANNEL f1 =====
NUC1          1H
P1            9.40 us
PL1           -3.20 dB
PL1W          33.59817505 W
SFO1          700.1245508 MHz
SI            131072
SF            700.1200000 MHz
WDW           EM
SSB           0
LB            0.30 Hz
GB            0
PC            1.00
  
```

Alcohol

- 178.54
- 145.38
- 141.59
- 124.79
- 113.85
- 82.72
- 78.17
- 77.23
- 77.05
- 76.87
- 76.54
- 74.06
- 65.42
- 61.82
- 45.33
- 39.40
- 38.72
- 37.03
- 32.84
- 27.22
- 26.01
- 25.98
- 25.94
- 18.33
- 18.26
- 18.14
- 16.37
- 16.19
- 15.67
- 4.09
- 4.36
- 4.53

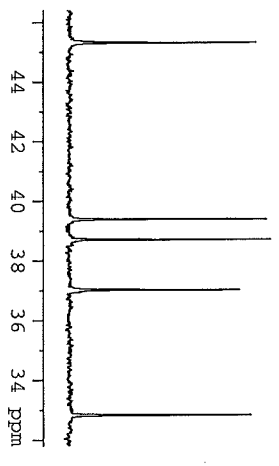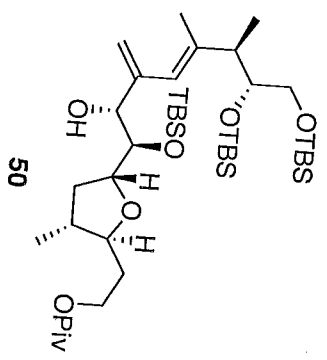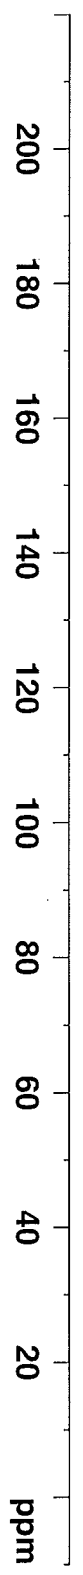

```

NAME SUM-XII-39-Alcohol:
EXPNO 3
PROCNO 1
Date_ 20110717
Time 19.09
INSTRUM spect
PROBHD 5 mm CPDCH 13C
PULPROG zgpg30
TD 98304
SOLVENT CDCl3
NS 997
DS 4
SWH 41666.668 Hz
FIDRES 0.423855 Hz
AQ 1.1796980 sec
RG 203
DE 12.000 usec
TE 15.00 usec
D1 298.2 K
D11 2.00000000 sec
TD0 0.03000000 sec

===== CHANNEL F1 =====
NUC1 13C
P1 9.00 usec
PL1 4.50 dB
PL1W 38.14553833 W
SF01 176.0637988 MH:

===== CHANNEL F2 =====
CPDPRG2 waltz16
NUC2 1H
PCPD2 65.00 usec
PL2 -3.20 dB
PL12 13.60 dB
PL13 120.00 dB
PL2W 33.59817505 W
PL12W 0.70196527 W
PL13W 0.00000000 W
SF02 700.1228005 MH:
SI 131072
SF 176.0453140 MH:
WDW EM
SSB 0
LB 3.00 Hz
GB 0
PC 1.40
  
```

Diene (Bottom Minor Spot)

|       |
|-------|
| 7.282 |
| 5.653 |
| 5.352 |
| 5.348 |
| 5.344 |
| 5.024 |
| 4.151 |
| 4.147 |
| 3.930 |
| 3.907 |
| 3.700 |
| 3.690 |
| 3.586 |
| 3.582 |
| 3.567 |
| 3.564 |
| 3.505 |
| 3.495 |
| 3.491 |
| 3.480 |
| 3.470 |
| 3.455 |
| 2.930 |
| 2.907 |
| 2.157 |
| 2.142 |
| 1.924 |
| 1.919 |
| 1.907 |
| 1.901 |
| 1.824 |
| 1.821 |
| 1.602 |
| 1.348 |
| 1.322 |
| 1.210 |
| 1.112 |
| 1.094 |
| 1.039 |
| 1.023 |
| 0.908 |
| 0.896 |
| 0.124 |
| 0.086 |
| 0.053 |
| 0.030 |

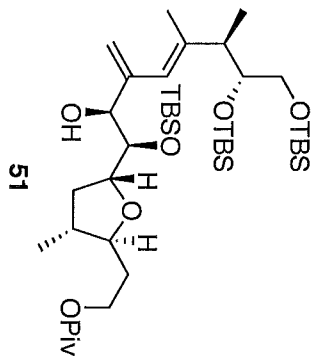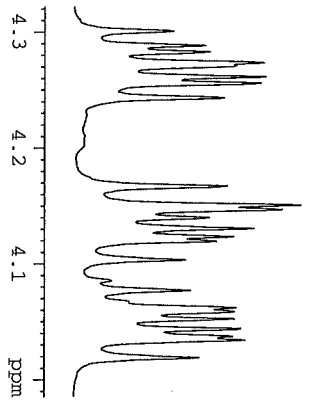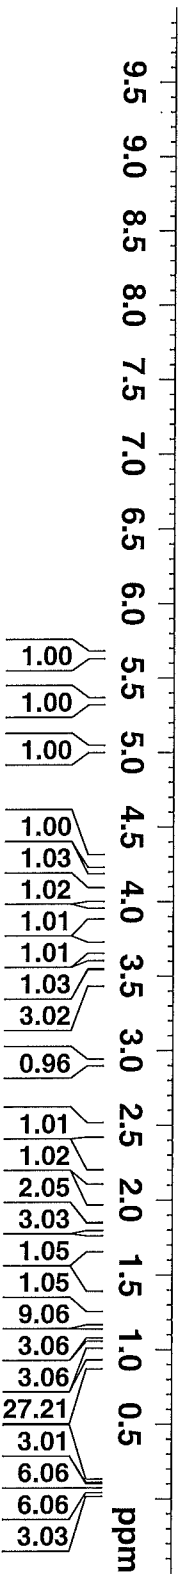

```

NAME          SUM-IX-06-R-Diene
EXPNO         3
PROCNO        1
Date_         20100831
Time          0.35
INSTRUM       robinson
PROBHD        5 mm PABBO BB-
PULPROG       zg30
TD            32768
SOLVENT       CDC13
NS            32
DS            2
SWH           6793.478 Hz
FIDRES        0.207320 Hz
AQ            2.4117749 sec
RG            57
DW            73.600 usec
DE            6.50 usec
TE            299.4 K
D1            2.00000000 sec
TD0           1

===== CHANNEL f1 =====
NUC1          1H
P1            14.00 usec
PL1           0.00 dB
SF01         400.1424008 MHz
SI           32768
SF           400.1400000 MHz
WDW          EM
SSB          0
LB           0.30 Hz
GB           0
PC           1.00
  
```



Diene

- 7.290
- 5.662
- 5.341
- 5.338
- 5.335
- 4.964
- 4.276
- 4.141
- 4.126
- 4.119
- 3.669
- 3.664
- 3.554
- 3.551
- 3.544
- 3.541
- 3.463
- 3.457
- 3.448
- 3.318
- 3.314
- 2.516
- 2.079
- 2.070
- 2.061
- 1.795
- 1.793
- 1.278
- 1.254
- 1.237
- 1.096
- 1.086
- 0.977
- 0.968
- 0.928
- 0.917
- 0.915
- 0.905
- 0.102
- 0.094
- 0.086
- 0.081
- 0.052
- 0.046
- 0.035
- 0.026

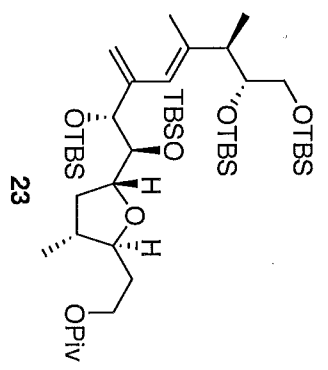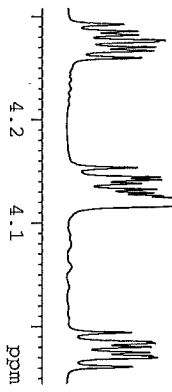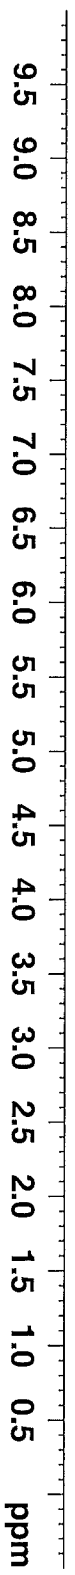

- 1.00
- 1.00
- 1.00
- 1.00
- 2.00
- 1.00
- 1.01
- 1.00
- 2.01
- 1.00
- 1.01
- 1.01
- 1.00
- 4.02
- 1.01
- 10.25
- 3.02
- 3.02
- 36.26
- 12.06
- 12.07

```

NAME          SUM-XII-15-Diene
EXPNO         1
PROCNO        1
Date_         20110701
Time         16.57
INSTRUM       spect
PROBHD        5 mm CPDCH 13C
PULPROG       zg30
TD            95236
SOLVENT       CDCl3
NS            32
DS            2
SWH           11904.762 Hz
FIDRES        0.125003 Hz
AQ            3.9999621 sec
RG            57
DW            42.000 usec
DE            16.50 usec
TE            298.2 K
D1            2.00000000 sec
TD0           1

===== CHANNEL f1 =====
NUC1          1H
P1            9.40 usec
PL1          -3.20 dB
PL1W         33.59817505 W
SF01         700.1245508 MHz
SI            131072
SF           700.1200000 MHz
WDW           EM
SSB           0
LB            0.30 Hz
GB            0
PC            1.00
  
```

Diene

178.48  
145.21  
140.91  
125.76  
114.34  
80.29  
79.56  
79.00  
78.56  
77.23  
77.05  
76.87  
76.67  
65.49  
62.15  
45.67  
40.32  
38.70  
37.97  
33.09  
27.21  
26.15  
26.02  
25.95  
18.43  
18.40  
18.34  
18.15  
16.06  
16.00  
15.98  
4.10  
4.20

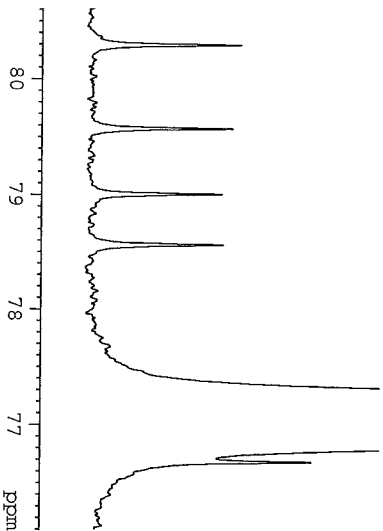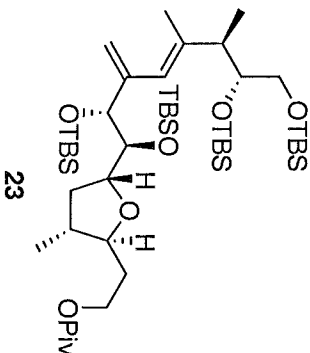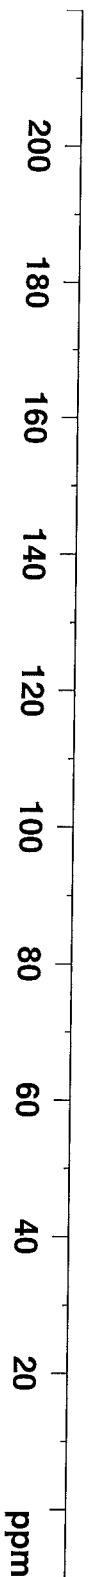

```

NAME          SUM-XI1-15-Diene
EXPNO         2
PROCNO        1
Date_         20110701
Time          17.21
INSTRUM      spect
PROBHD       5 mm CPDCH 13C
PULPROG      zgpg30
TD           98304
SOLVENT      CDCl3
NS           528
DS           4
SWH          41666.668 Hz
FIDRES       0.423855 Hz
AQ           1.1796980 sec
RG           203
DE           12.000 us
TE           15.00 us
D1           298.2 K
D11          2.00000000 sec
TD0          0.03000000 sec

===== CHANNEL f1 =====
NUC1          13C
P1           9.00 us
PL1          4.50 dB
PL1W         38.14553833 W
SFO1         176.0637988 MHz

===== CHANNEL f2 =====
CPDPRG2      waltz16
NUC2          1H
PCPD2        65.00 us
PL2          -3.20 dB
PL12         13.60 dB
PL13         120.00 dB
PL1W         33.59817505 W
PL12W        0.70196527 W
PL13W        0.00000000 W
SFO2         700.1228005 MHz
SI           131072
SF           176.0453140 MHz
WDW          EM
SSB          0
LB           3.00 Hz
GB           0
PC           1.40
  
```



A1cohol

|       |       |
|-------|-------|
| 7.282 | 0.026 |
| 5.735 | 0.058 |
| 5.322 | 0.083 |
| 5.318 | 0.096 |
| 4.970 | 0.110 |
| 4.256 | 0.117 |
| 4.149 | 0.915 |
| 4.145 | 0.918 |
| 4.129 | 0.925 |
| 4.118 | 0.977 |
| 3.796 | 1.068 |
| 3.783 | 1.086 |
| 3.575 | 1.205 |
| 3.571 | 1.247 |
| 3.563 | 1.275 |
| 3.559 | 1.704 |
| 3.556 | 1.720 |
| 3.545 | 1.736 |
| 3.538 | 1.803 |
| 3.356 | 1.806 |
| 3.349 | 2.050 |
| 2.499 | 2.066 |
| 2.081 | 2.081 |
| 2.066 | 2.081 |
| 2.050 | 2.081 |
| 1.806 | 2.081 |
| 1.803 | 2.081 |
| 1.736 | 2.081 |
| 1.720 | 2.081 |
| 1.704 | 2.081 |
| 1.275 | 2.081 |
| 1.247 | 2.081 |
| 1.205 | 2.081 |
| 1.086 | 2.081 |
| 1.068 | 2.081 |
| 0.993 | 2.081 |
| 0.977 | 2.081 |
| 0.925 | 2.081 |
| 0.918 | 2.081 |
| 0.915 | 2.081 |
| 0.117 | 2.081 |
| 0.110 | 2.081 |
| 0.096 | 2.081 |
| 0.083 | 2.081 |
| 0.058 | 2.081 |
| 0.026 | 2.081 |

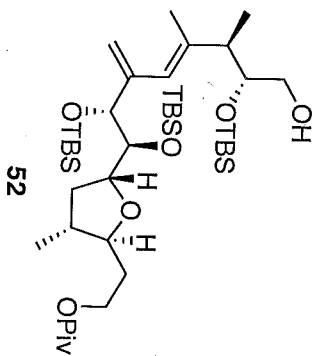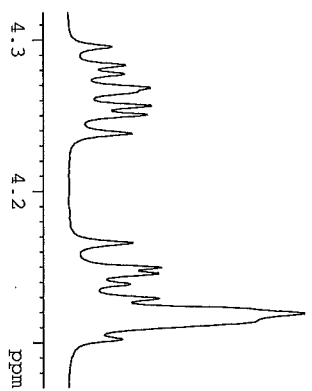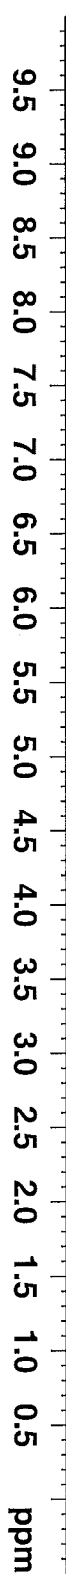

|       |
|-------|
| 1.00  |
| 1.00  |
| 1.01  |
| 1.02  |
| 2.01  |
| 1.00  |
| 1.01  |
| 3.02  |
| 1.02  |
| 1.01  |
| 1.02  |
| 4.03  |
| 2.01  |
| 10.03 |
| 3.01  |
| 3.01  |
| 27.23 |
| 12.02 |
| 6.01  |

```

NAME SM-VII-25-R-Alcohol
EXPNO 2
PROCNO 1
Date_ 20100830
Time 22.11
INSTRUM robinson
PROBHD 5 mm PABBO BB-
PULPROG zg30
TD 32768
SOLVENT CDC13
NS 32
DS 2
SWH 6793.478 Hz
FIDRES 0.207320 Hz
AQ 2.4117749 sec
RG 4
DW 73.600 usec
DE 6.50 usec
TE 299.2 K
D1 2.00000000 sec
TD0 1

===== CHANNEL f1 =====
NUC1 1H
P1 14.00 usec
PL1 0.00 dB
SFO1 400.1424008 MHz
SI 32768
SF 400.1400000 MHz
WDW EM
SSB 0
LB 0.30 Hz
GB 0
PC 1.00
  
```



Iodide

- 7.289
- 5.821
- 5.345
- 4.997
- 4.279
- 4.157
- 4.154
- 4.139
- 4.136
- 3.989
- 3.974
- 3.697
- 3.694
- 3.688
- 3.575
- 3.570
- 3.565
- 3.561
- 3.379
- 3.375
- 3.181
- 3.175
- 3.165
- 3.155
- 2.670
- 2.078
- 2.069
- 2.061
- 1.818
- 1.816
- 1.309
- 1.294
- 1.284
- 1.215
- 1.069
- 1.059
- 1.003
- 0.994
- 0.938
- 0.925
- 0.145
- 0.109
- 0.106
- 0.096
- 0.068
- 0.038

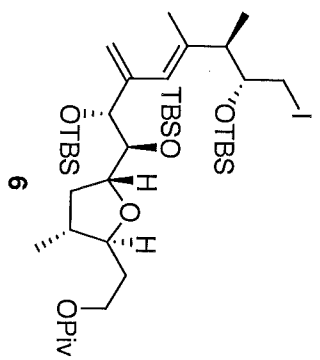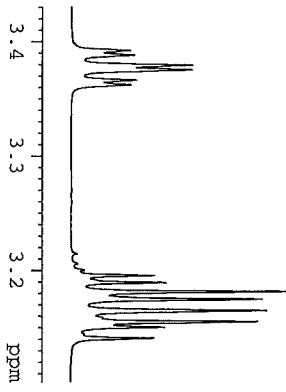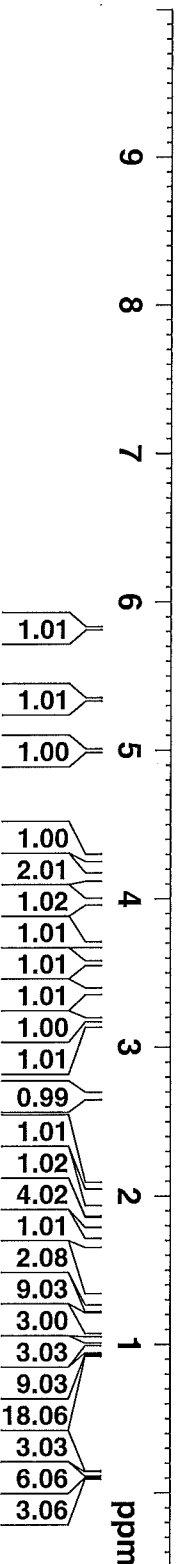

```

NAME SM-VII-44
EXPNO 1
PROCNO 1
Date_ 20100618
Time 15.46
INSTRUM spect
PROBHD 5 mm CPDCH 13C
PULPROG zg30
TD 65536
SOLVENT CDCl3
NS 32
DS 2
SWH 11904.762 Hz
FIDRES 0.181652 Hz
AQ 2.7525620 sec
RG 45.2
DW 42.000 usec
DE 16.50 usec
TE 297.9 K
D1 2.00000000 sec
TD0 1

===== CHANNEL f1 =====
NUC1 1H
P1 9.40 usec
PL1 -3.20 dB
PL1W 33.59817505 W
SFO1 700.1245508 MHz
SI 65536
SF 700.1200000 MHz
WDW EM
SSB 0
LB 0.30 Hz
GB 0
PC 1.00
  
```

Iodide

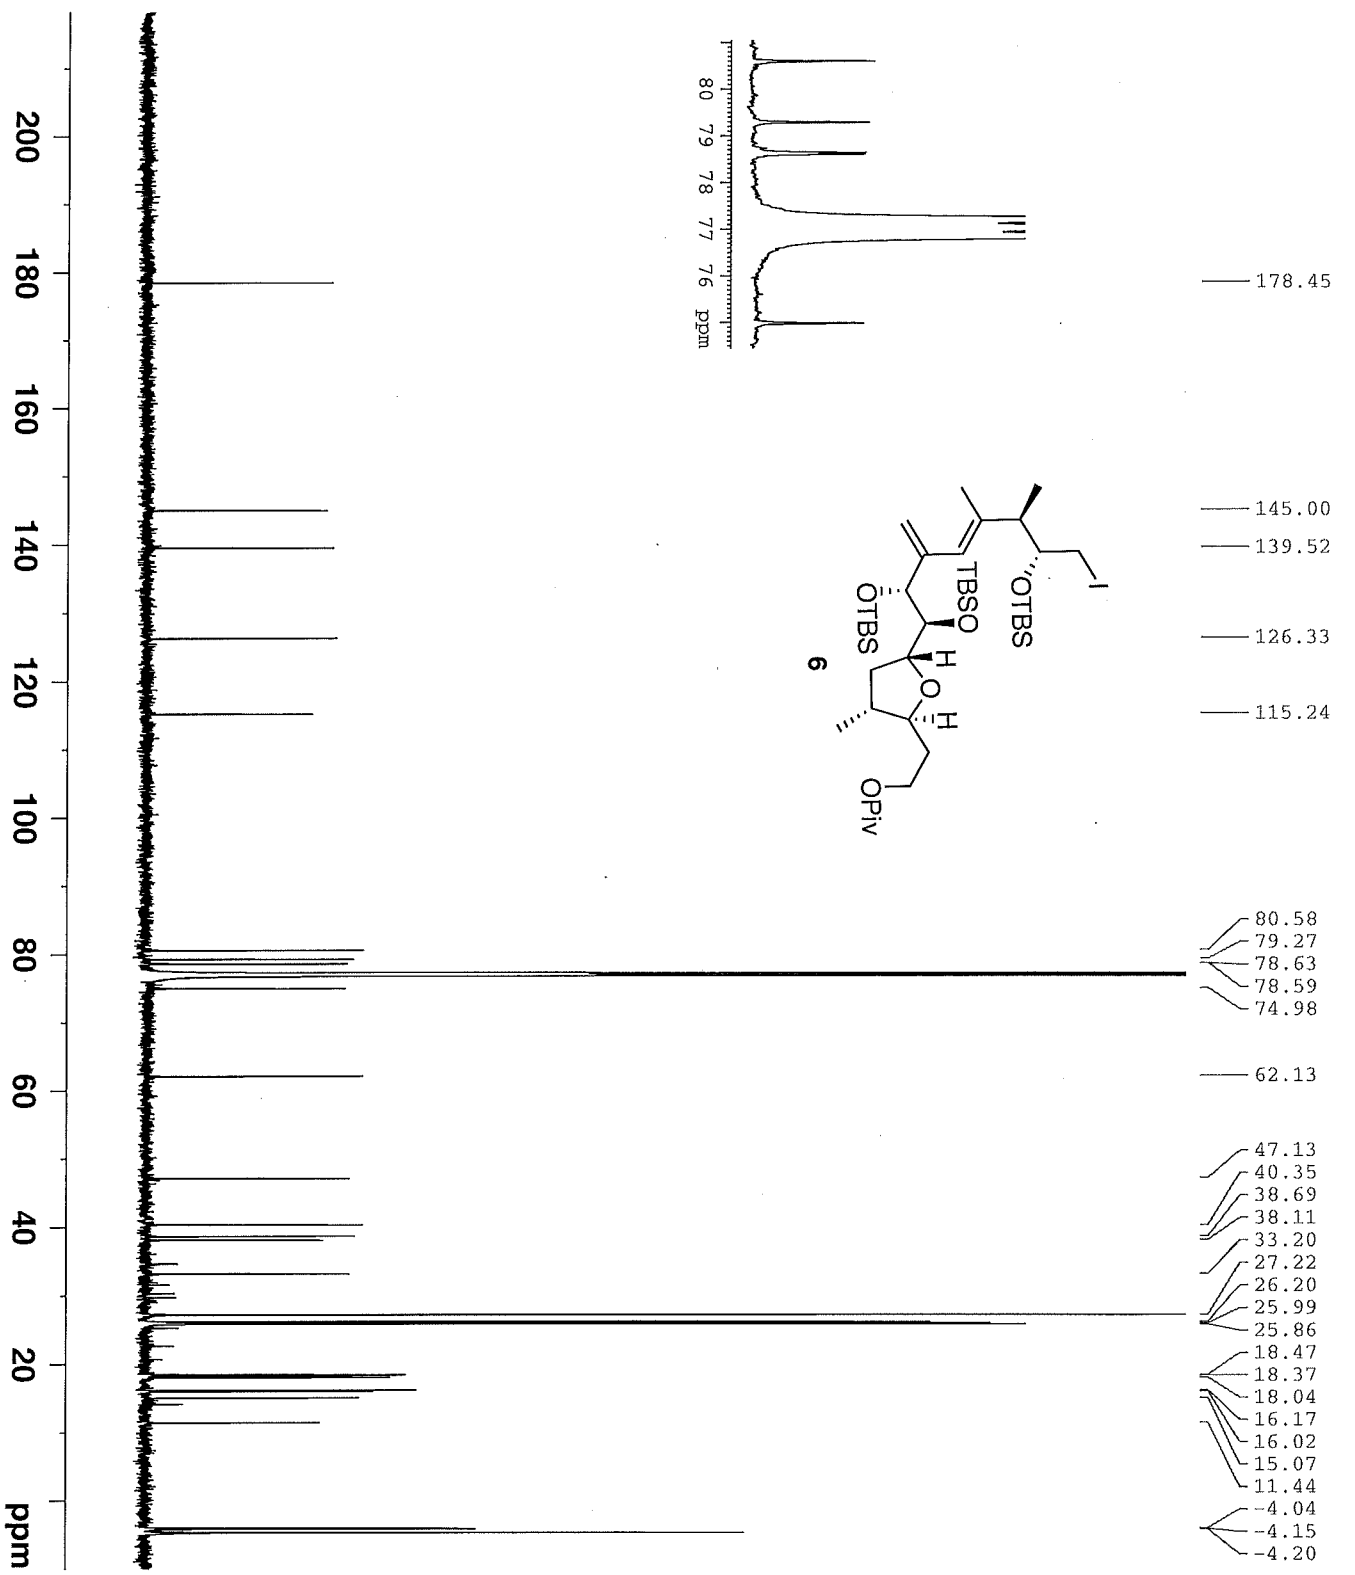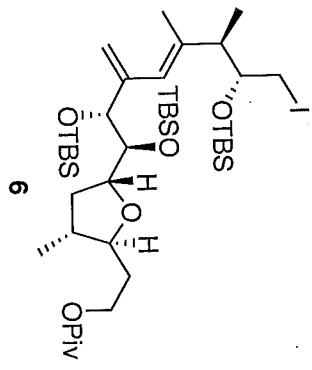

- 178.45
- 145.00
- 139.52
- 126.33
- 115.24
- 80.58
- 79.27
- 78.63
- 78.59
- 74.98
- 62.13
- 47.13
- 40.35
- 38.69
- 38.11
- 33.20
- 27.22
- 26.20
- 25.99
- 25.86
- 18.47
- 18.37
- 18.04
- 16.17
- 16.02
- 15.07
- 11.44
- 4.04
- 4.15
- 4.20

```

NAME SM-VII-44
EXPNO 2
PROCNO 1
Date_ 20100618
Time 16.01
INSTRUM spect
PROBHD 5 mm CPDCH 13C
PULPROG zgpg30
TD 98304
SOLVENT CDCl3
NS 296
DS 4
SWH 41666.668 Hz
FIDRES 0.423855 Hz
AQ 1.1796980 sec
RG 203
DW 12.000 usec
DE 15.00 usec
TE 298.0 K
D1 2.00000000 sec
D11 0.03000000 sec
TD0 1

===== CHANNEL F1 =====
NUC1 13C
P1 9.00 usec
PL1 4.50 dB
PL1W 38.14553833 W
SFO1 176.0629186 MH:

===== CHANNEL F2 =====
CPDPRG2 waltz16
NUC2 1H
PCPD2 65.00 usec
PL2 -3.20 dB
PL12 13.60 dB
PL13 120.00 dB
PL12W 33.59817505 W
PL12W 0.70196527 W
PL13W 0.00000000 W
SFO2 700.1228005 MH:
SI 131072
SF 176.0453140 MH:
WDW EM
SSB 0
LB 3.00 Hz
GB 0
PC 1.40
  
```

Alcohol (Major Isomer)

|       |
|-------|
| 7.290 |
| 4.407 |
| 4.369 |
| 4.367 |
| 4.362 |
| 4.253 |
| 4.245 |
| 4.238 |
| 4.236 |
| 4.229 |
| 4.180 |
| 4.171 |
| 4.168 |
| 4.159 |
| 3.975 |
| 3.971 |
| 3.963 |
| 3.813 |
| 3.811 |
| 3.711 |
| 3.707 |
| 3.700 |
| 3.695 |
| 3.638 |
| 3.633 |
| 3.624 |
| 3.618 |
| 3.611 |
| 3.598 |
| 3.583 |
| 2.170 |
| 2.162 |
| 2.151 |
| 2.144 |
| 1.873 |
| 1.851 |
| 1.839 |
| 1.713 |
| 1.709 |
| 1.706 |
| 1.213 |
| 0.939 |
| 0.906 |
| 0.139 |
| 0.133 |
| 0.116 |

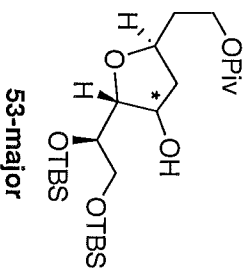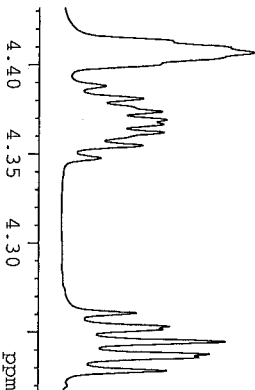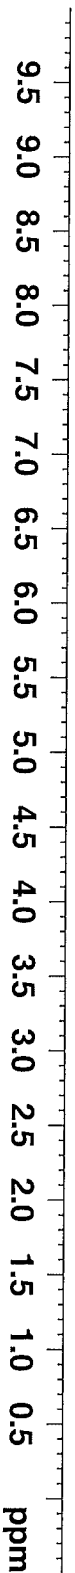

|      |
|------|
| 1.00 |
| 0.99 |
| 1.00 |
| 1.02 |
| 1.00 |
| 1.00 |
| 1.01 |
| 2.00 |

|      |
|------|
| 1.01 |
| 2.00 |
| 1.01 |

|      |
|------|
| 9.00 |
| 9.00 |
| 9.03 |

|      |
|------|
| 9.01 |
| 3.02 |

```

NAME          SUM-XII-23-Alcohol
EXPNO         2
PROCNO        1
Date_         20110705
Time          21.30
INSTRUM       spect
PROBHD        5 mm CPDCH 13C
PULPROG       zg30
TD            95236
SOLVENT       CDCl3
NS            32
DS            2
SWH           11904.762 Hz
FIDRES        0.125003 Hz
AQ            3.9999621 se
RG            57
DW            42.000 usec
DE            16.50 usec
TE            298.2 K
D1            2.00000000 sec
TD0           1

===== CHANNEL f1 =====
NUC1          1H
P1            9.40 usec
PL1          -3.20 dB
PL1W         33.59817505 W
SF01         700.1245508 MHz
SI           131072
SF           700.1200000 MHz
WDW          EM
SSB          0
LB           0.30 Hz
GB           0
PC           1.00
  
```

Alcohol (Major Isomer)

53-major

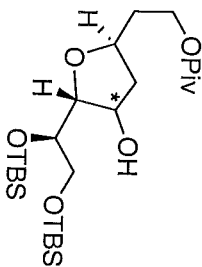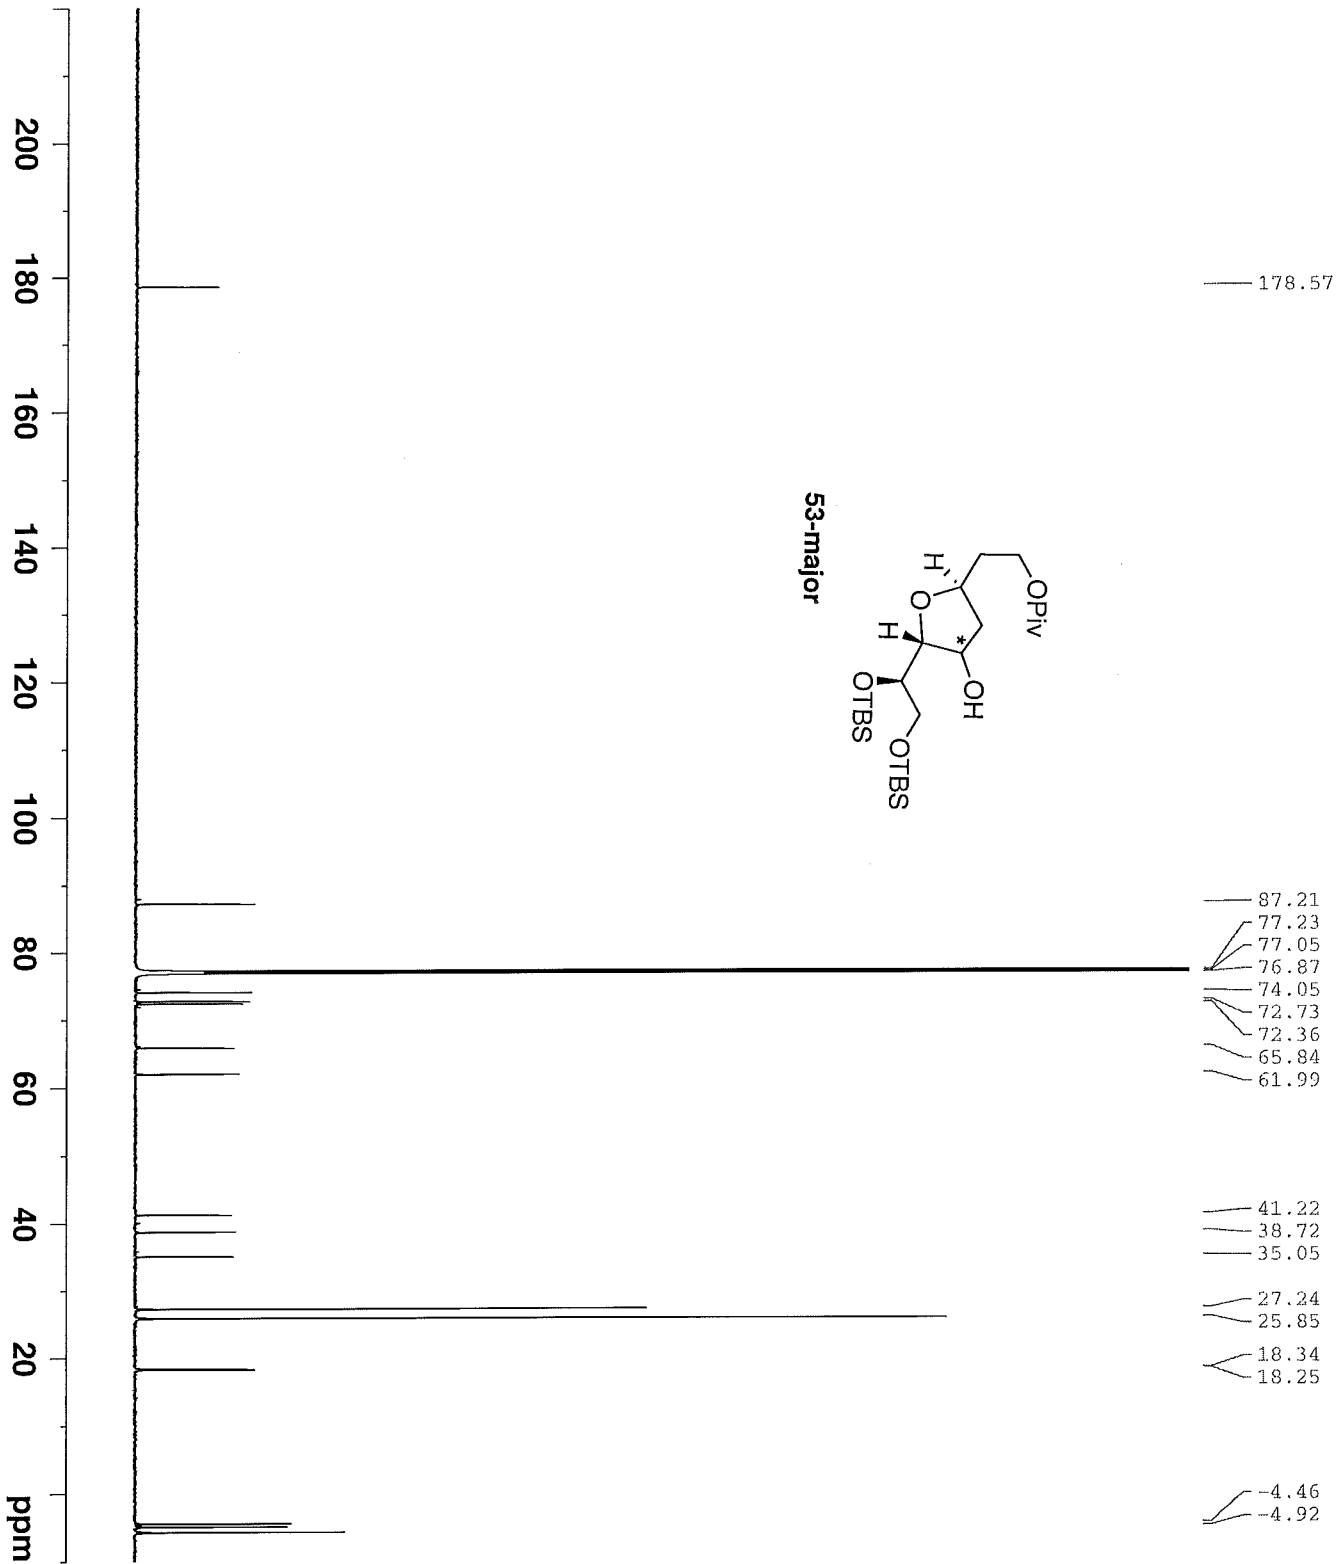

- 178.57
- 87.21
- 77.23
- 77.05
- 76.87
- 74.05
- 72.73
- 72.36
- 65.84
- 61.99
- 41.22
- 38.72
- 35.05
- 27.24
- 25.85
- 18.34
- 18.25
- 4.46
- 4.92

```

NAME SUM-XXI-23-Alcohol
EXPNO 3
PROCNO 1
Date_ 20110705
time 21.40
INSTRUM spect
PROBHD 5 mm CPDCH 13C
PULPROG zgpg30
TD 98304
SOLVENT CDCl3
NS 126
DS 4
SWH 41666.668 Hz
FIDRES 0.42385 Hz
AQ 1.1796980 sec
RG 203
DW 12.000 usec
DE 15.00 usec
TE 298.2 K
D1 2.00000000 sec
D11 0.03000000 sec
TD0 1

===== CHANNEL F1 =====
NUC1 13C
P1 9.00 usec
PL1 4.50 dB
PL1W 38.14553833 W
SFO1 176.0637988 MHz

===== CHANNEL F2 =====
CPDPRG2 waltz16
NUC2 1H
PCPD2 65.00 usec
PL2 -3.20 dB
PL12 13.60 dB
PL13 120.00 dB
PL2W 33.59817505 W
PL12W 0.70196527 W
PL13W 0.00000000 W
SFO2 700.1228005 MHz
SI 131072
SF 176.0453140 MHz
WDW EM
SSB 0
LB 3.00 Hz
GB 0
PC 1.40
    
```

Alcohol (Minor Isomer)

|       |
|-------|
| 7.290 |
| 4.269 |
| 4.261 |
| 4.258 |
| 4.215 |
| 4.208 |
| 4.199 |
| 4.192 |
| 4.177 |
| 4.169 |
| 4.166 |
| 4.157 |
| 4.150 |
| 4.141 |
| 4.135 |
| 4.128 |
| 3.701 |
| 3.698 |
| 3.693 |
| 3.689 |
| 3.679 |
| 3.659 |
| 3.651 |
| 3.642 |
| 3.399 |
| 3.394 |
| 3.390 |
| 2.429 |
| 2.421 |
| 2.412 |
| 1.958 |
| 1.950 |
| 1.939 |
| 1.912 |
| 1.901 |
| 1.732 |
| 1.727 |
| 1.719 |
| 1.715 |
| 1.215 |
| 0.929 |
| 0.904 |
| 0.128 |
| 0.125 |
| 0.109 |
| 0.091 |

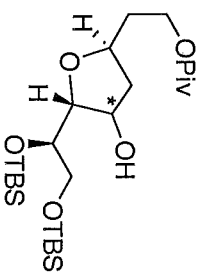

53-minor

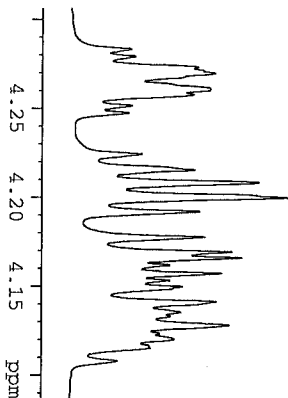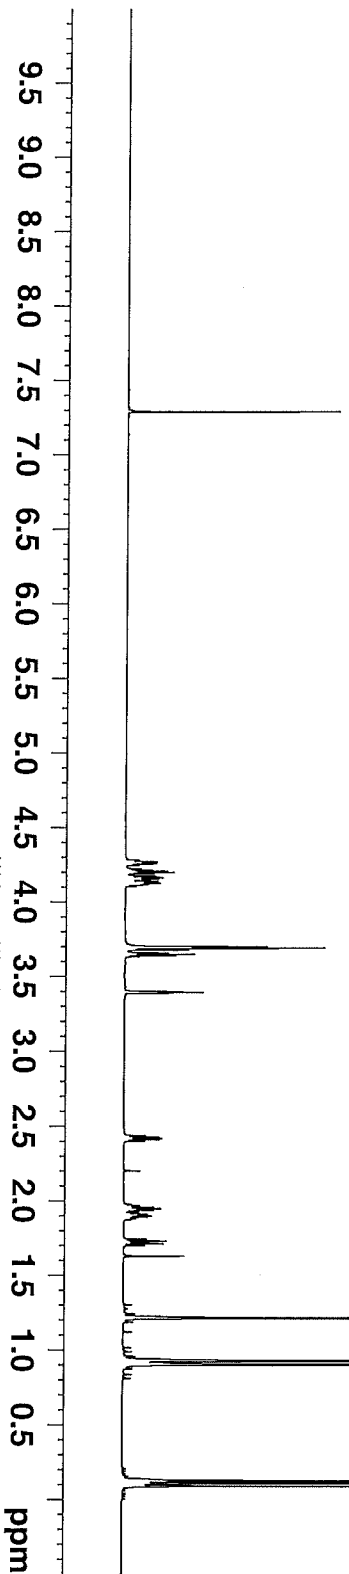

|      |
|------|
| 1.00 |
| 1.01 |
| 2.00 |
| 3.01 |
| 1.01 |
| 1.00 |
| 1.01 |
| 2.01 |
| 1.01 |
| 9.01 |
| 9.00 |
| 9.00 |
| 6.00 |
| 3.03 |
| 3.01 |

```

NAME          SUM-XII-23-Alcohol:
EXPNO         7
PROCNO        1
Date_         20110705
Time          23.51
INSTRUM       spect
PROBHD        5 mm CPDCH 13C
PULPROG       zg30
TD            95236
SOLVENT       CDCl3
NS            18
DS            2
SWH           11904.762 Hz
FIDRES        0.125003 Hz
AQ            3.9999621 sec
RG            57
DW            42.000 usec
DE            16.50 usec
TE            298.2 K
D1            2.00000000 sec
TD0           1

===== CHANNEL f1 =====
NUC1          1H
P1            9.40 usec
PL1          -3.20 dB
PL1W         33.59817505 W
SF01         700.1245508 MHz
SI           131072
SF           700.1200000 MHz
WDW          EM
SSB          0
LB           0.30 Hz
GB           0
PC           1.00
    
```

Alcohol (Minor Isomer)

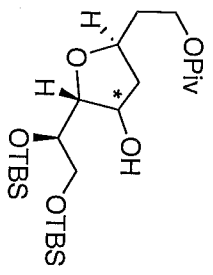

53-minor

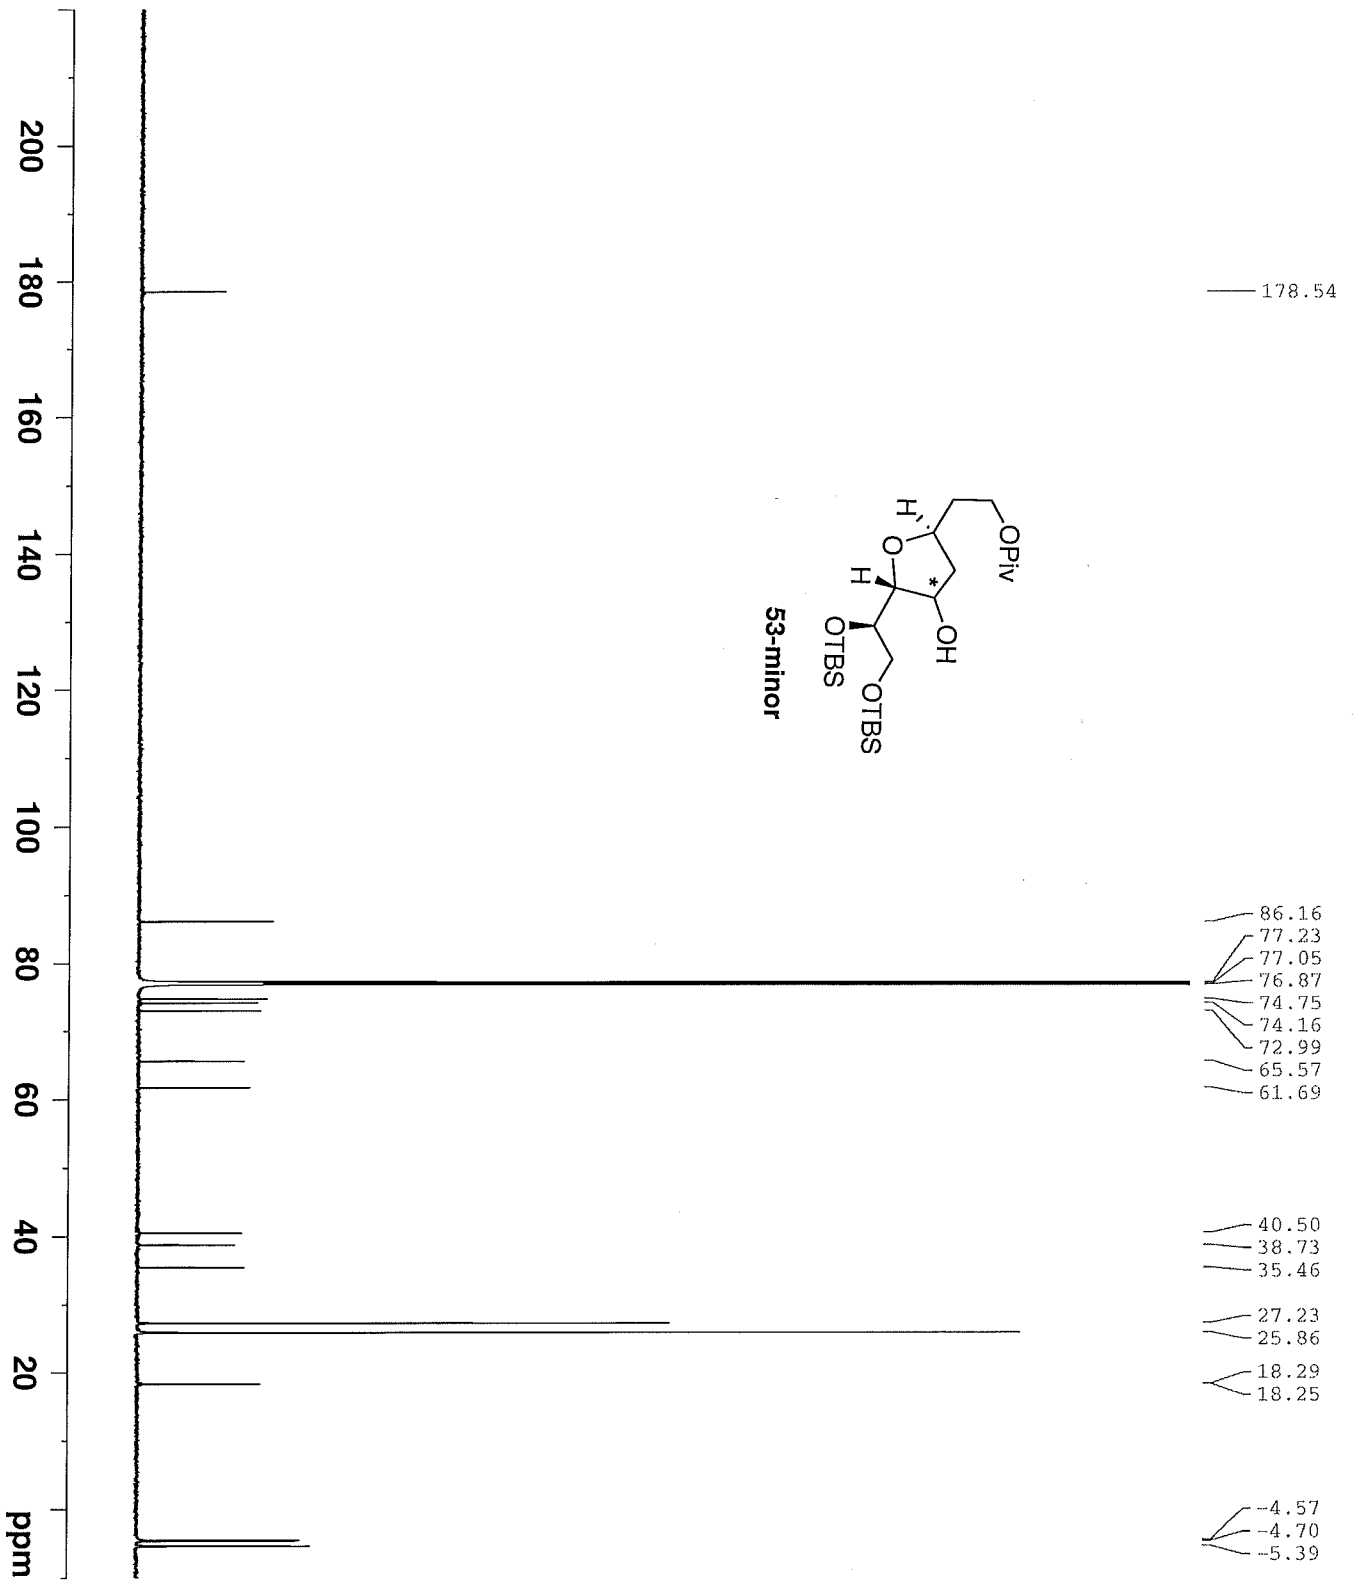

| Chemical Shift (ppm) |
|----------------------|
| 178.54               |
| 86.16                |
| 77.23                |
| 76.87                |
| 74.75                |
| 74.16                |
| 72.99                |
| 65.57                |
| 61.69                |
| 40.50                |
| 38.73                |
| 35.46                |
| 27.23                |
| 25.86                |
| 18.29                |
| 18.25                |
| 4.57                 |
| 4.70                 |
| 5.39                 |

```

NAME SUM-XII-23-Alcohol:
EXPNO 8
PROCNO 1
Date_ 20110706
Time 17.38
INSTRUM spect
PROBHD 5 mm CPDCH 13C
PULPROG zgpg30
TD 98304
SOLVENT CDCl3
NS 201
DS 4
SWMH 41666.668 Hz
FIDRES 0.423855 Hz
AQ 1.1796980 sec
RG 203
DE 12.000 us
TE 15.00 us
D1 298.2 K
D11 2.00000000 sec
TD0 0.03000000 sec

===== CHANNEL f1 =====
NUC1 13C
P1 9.00 us
PL1 4.50 dB
PL1W 38.14553833 W
SFO1 176.0637988 MHz

===== CHANNEL f2 =====
CPDPRG2 waltz16
NUC2 1H
PCPD2 65.00 us
PL2 -3.20 dB
PL12 13.60 dB
PL13 120.00 dB
PL2W 33.59817505 W
PL12W 0.70196527 W
PL13W 0.00000000 W
SFO2 700.1228005 MHz
SI 131072
SF 176.0453140 MHz
WDW EM
SSB 0
LB 3.00 Hz
GB 0
PC 1.40
  
```



Major Thioate

|       |       |       |       |       |       |       |       |       |       |       |       |       |       |       |       |       |       |       |       |       |       |       |       |       |       |       |       |       |       |       |       |       |       |       |       |       |       |       |       |       |       |       |       |        |        |
|-------|-------|-------|-------|-------|-------|-------|-------|-------|-------|-------|-------|-------|-------|-------|-------|-------|-------|-------|-------|-------|-------|-------|-------|-------|-------|-------|-------|-------|-------|-------|-------|-------|-------|-------|-------|-------|-------|-------|-------|-------|-------|-------|-------|--------|--------|
| 8.318 | 7.608 | 7.290 | 7.092 | 7.091 | 7.090 | 5.976 | 5.971 | 5.966 | 4.321 | 4.253 | 4.245 | 4.237 | 4.209 | 4.200 | 4.197 | 4.189 | 4.141 | 4.137 | 4.130 | 4.125 | 3.971 | 3.965 | 3.960 | 3.958 | 3.954 | 3.947 | 3.602 | 3.595 | 3.589 | 2.536 | 2.527 | 2.515 | 2.506 | 2.067 | 1.929 | 1.920 | 1.910 | 1.901 | 1.213 | 0.927 | 0.839 | 0.143 | 0.131 | -0.002 | -0.044 |
|-------|-------|-------|-------|-------|-------|-------|-------|-------|-------|-------|-------|-------|-------|-------|-------|-------|-------|-------|-------|-------|-------|-------|-------|-------|-------|-------|-------|-------|-------|-------|-------|-------|-------|-------|-------|-------|-------|-------|-------|-------|-------|-------|-------|--------|--------|

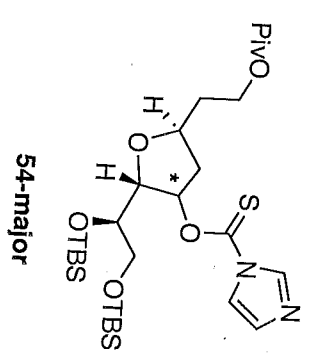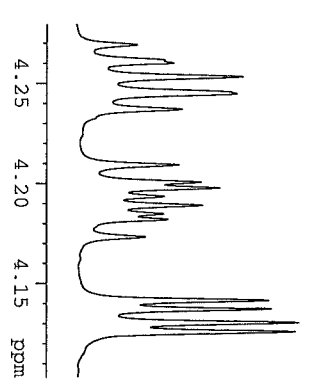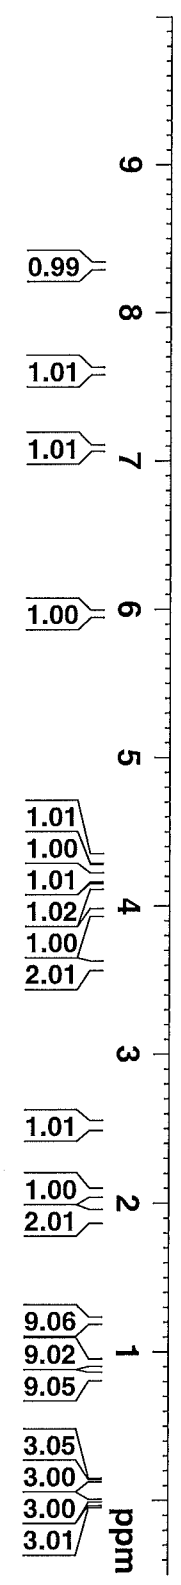

```

NAME          SUM-XI-81-Thioate
EXPNO         1
PROCNO       1
Date_        20110612
Time         19.22
INSTRUM      spect
PROBHD       5 mm CPDCH 13C
PULPROG      zg30
TD           65536
SOLVENT      CDCl3
NS           32
DS           2
SWH          11904.762 Hz
FIDRES      0.181652 Hz
AQ          2.7525620 se
RG           57
DW          42.000 us
DE          16.50 us
TE          298.2 K
D1          2.00000000 se
TD0         1

===== CHANNEL f1 =====
NUC1         1H
P1           9.40 us
PL1         -3.20 dB
PL1W       33.59817505 W
SF01       700.1245508 MHz
SI         65536
SF         700.1200000 MHz
WDW         EM
SSB         0
LB         0.30 Hz
GB         0
PC         1.00
  
```

Major Thioate

- 182.69
- 178.43
- 136.61
- 131.09
- 117.74
- 84.43
- 82.24
- 77.23
- 77.05
- 76.87
- 73.87
- 72.70
- 66.09
- 61.52
- 39.35
- 38.75
- 35.04
- 27.22
- 25.99
- 25.85
- 18.52
- 18.38
- 4.46
- 4.60

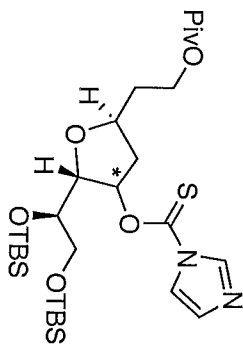

54-major

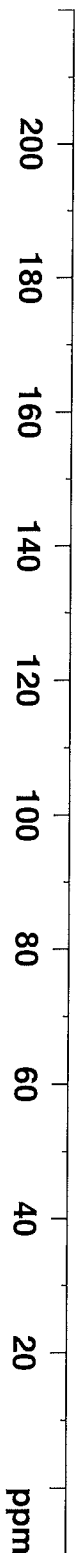

|         |                   |
|---------|-------------------|
| NAME    | SUM-XI-81-Thioate |
| EXPNO   | 2                 |
| PROCNO  | 1                 |
| Date_   | 20110612          |
| Time    | 19.31             |
| INSTRUM | spect             |
| PROBHD  | 5 mm CPDCH 13C    |
| PULPROG | zgpg30            |
| TD      | 98304             |
| SOLVENT | CDCl3             |
| NS      | 1009              |
| DS      | 4                 |
| SWH     | 41666.668 Hz      |
| FIDRES  | 0.423855 Hz       |
| AQ      | 1.1796980 sec     |
| RG      | 203               |
| DW      | 12.000 us         |
| DE      | 15.00 us          |
| TE      | 298.2 K           |
| D1      | 2.00000000 sec    |
| D11     | 0.03000000 sec    |
| TD0     | 1                 |

  

|                        |                 |
|------------------------|-----------------|
| ===== CHANNEL F1 ===== |                 |
| NUC1                   | 13C             |
| P1                     | 9.00 us         |
| PL1                    | 4.50 dB         |
| PL1W                   | 38.14553833 W   |
| SFO1                   | 176.0637988 MHz |

  

|                        |                 |
|------------------------|-----------------|
| ===== CHANNEL F2 ===== |                 |
| CPDPRG2                | waltz16         |
| NUC2                   | 1H              |
| PCPD2                  | 65.00 us        |
| PL2                    | -3.20 dB        |
| PL12                   | 13.60 dB        |
| PL13                   | 120.00 dB       |
| PL12W                  | 33.59817505 W   |
| PL13W                  | 0.70196527 W    |
| SFO2                   | 0.00000000 W    |
| SI                     | 700.1228005 MHz |
| SF                     | 131072          |
| WDW                    | EM              |
| SSB                    | 176.0453140 MHz |
| LB                     | 3.00 Hz         |
| GB                     | 0               |
| PC                     | 1.40            |



Minor Thioate

183.52  
178.53

136.91  
130.97  
117.89

86.99  
83.22  
77.23  
77.05  
76.87  
74.37  
63.57  
61.64

38.74  
38.59  
35.45  
27.23  
25.97  
25.83  
18.40  
17.93

-4.27  
-4.73

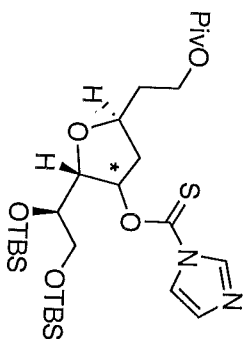

54-minor

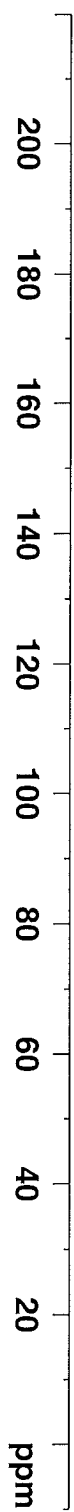

```

NAME          SUM-XI-80-Thioate
EXPNO         4
PROCNO        1
Date_         20110615
Time          22.49
INSTRUM       spect
PROBHD        5 mm CPDCH 13C
PULPROG       zgpg30
TD            98304
SOLVENT       CDCl3
NS            129
DS            4
SWH           41666.668 Hz
FIDRES        0.423855 Hz
AQ            1.1796980 se
RG            203
DW            12.000 us
DE            15.00 us
TE            298.2 K
D1            2.00000000 se
D11           0.03000000 se
TD0           1

===== CHANNEL f1 =====
NUC1          13C
P1            9.00 us
PL1           4.50 dB
PL1W         38.14553833 W
SF01         176.0637988 MHz

===== CHANNEL f2 =====
CPDPRG2      waltz16
NUC2          1H
PCPD2        65.00 us
PL2          -3.20 dB
PL12         13.60 dB
PL13         120.00 dB
PL2W         33.59817505 W
PL12W        0.70196527 W
PL13W        0.00000000 W
SF02         700.1228005 MHz
SI           131072
SF           176.0453140 MHz
WDW          EM
SSB          0
LB           3.00 Hz
GB           0
PC           1.40
    
```

Tetrahydrofuran

|       |
|-------|
| 7.282 |
| 4.195 |
| 4.179 |
| 4.170 |
| 4.164 |
| 4.154 |
| 4.152 |
| 4.136 |
| 4.079 |
| 4.070 |
| 4.060 |
| 4.051 |
| 4.021 |
| 3.703 |
| 3.683 |
| 3.674 |
| 3.654 |
| 3.595 |
| 3.582 |
| 3.574 |
| 3.572 |
| 3.566 |
| 3.553 |
| 1.935 |
| 1.918 |
| 1.884 |
| 1.867 |
| 1.853 |
| 1.849 |
| 1.842 |
| 1.835 |
| 1.831 |
| 1.813 |
| 1.799 |
| 1.796 |
| 1.783 |
| 1.544 |
| 1.520 |
| 1.514 |
| 1.207 |
| 0.909 |
| 0.905 |
| 0.091 |
| 0.089 |
| 0.074 |
| 0.069 |

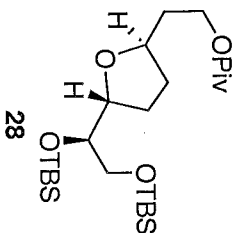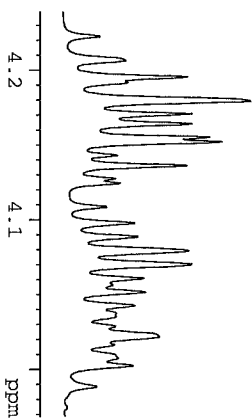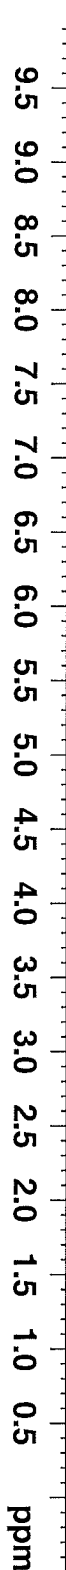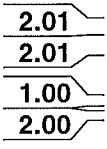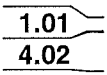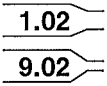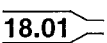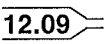

```

NAME          SUM-XI-82-R-THF
EXPNO         2
PROCNO        1
Date_         20110614
Time          0.08
INSTRUM       robinson
PROBHD        5 mm PABBO BB-
PULPROG       zg30
TD            32768
SOLVENT       CDCl3
NS            32
DS            2
SWH           6793.478 Hz
FIDRES       0.207320 Hz
AQ           2.4117749 sec
RG           45.3
DE           73.600 us
TE           298.2 K
D1           2.0000000 sec
TD0          1

===== CHANNEL f1 =====
NUC1          1H
P1           14.00 us
PL1          0.00 dB
SFO1         400.1424008 MHz
SI           32768
SF           400.1400000 MHz
WDW          EM
SSB          0
LB           0.30 Hz
GB           0
PC           1.00
    
```

Tetrahydrofuran

178.60

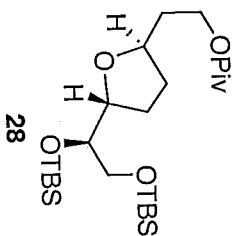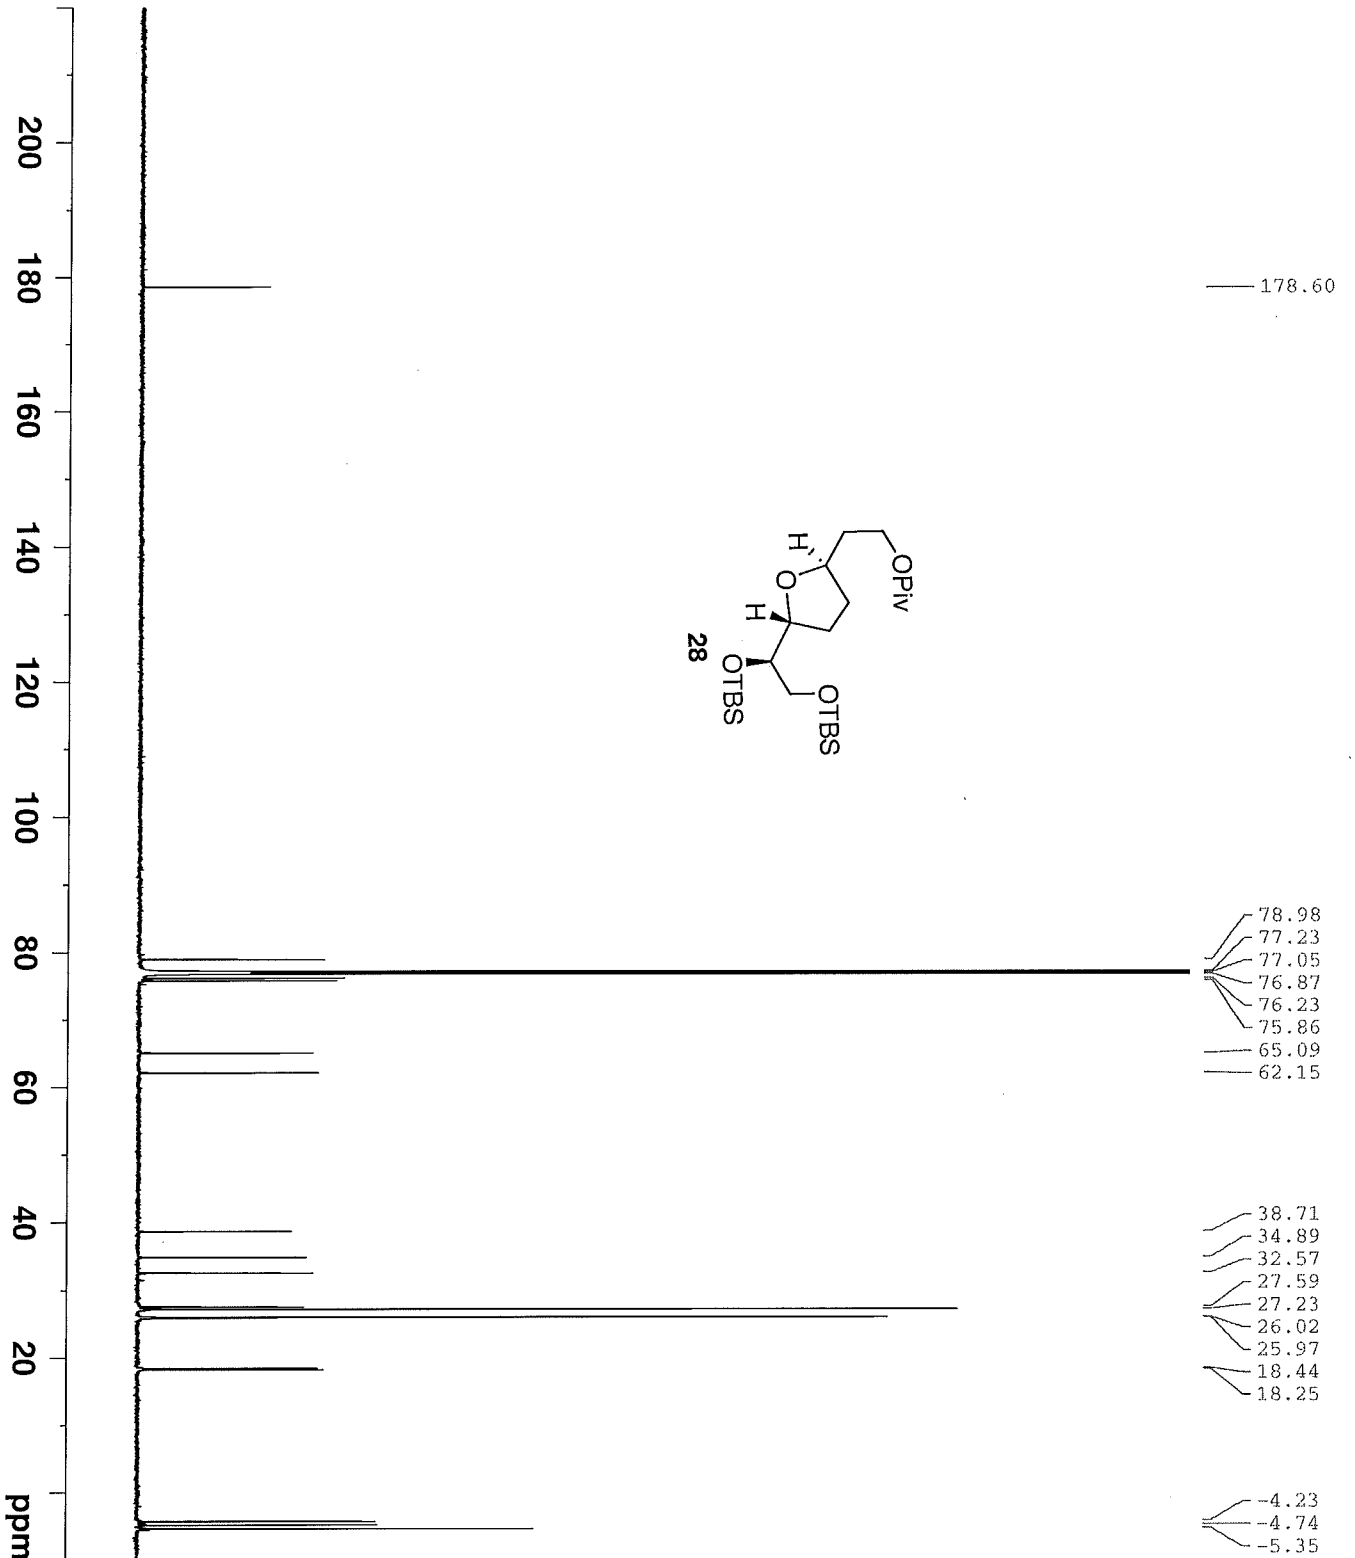

78.98  
77.23  
77.05  
76.87  
76.23  
75.86  
65.09  
62.15  
38.71  
34.89  
32.57  
27.59  
27.23  
26.02  
25.97  
18.44  
18.25  
4.23  
4.74  
5.35

```

NAME          SUM-XI-82-top  THF
EXPNO         4
PROCNO        1
Date_         20110614
Time          17.56
INSTRUM       spect
PROBHD        5 mm CPDCH 13C
PULPROG       zgpg30
TD            98304
SOLVENT       CDCl3
NS            101
DS            4
SWH           41666.668 Hz
FIDRES        0.423855 Hz
AQ            1.1796980 se
RG            203
DE            12.000 us
TE            298.2 K
D1            2.00000000 se
D11           0.03000000 se
TD0           1

===== CHANNEL f1 =====
NUC1          13C
P1            9.00 us
PL1           4.50 dB
PL1W          38.14553833 W
SF01          176.0637988 MH

===== CHANNEL f2 =====
CPDPRG2      waltz16
NUC2          1H
PCPD2        65.00 us
PL2          -3.20 dB
PL12         13.60 dB
PL13         120.00 dB
PL2W         33.59817505 W
PL12W        0.70196527 W
PL13W        0.00000000 W
SF02          700.1228005 MH
SI           131072
SF           176.0453140 MH
WDW          EM
SSB          0
LB           3.00 Hz
GB           0
PC           1.40
    
```

Alcohol

- 7.282
- 4.178
- 4.168
- 4.159
- 4.150
- 4.145
- 4.141
- 4.132
- 3.822
- 3.811
- 3.806
- 3.801
- 3.792
- 3.782
- 3.780
- 3.659
- 3.651
- 3.631
- 3.594
- 3.589
- 3.582
- 3.576
- 3.567
- 3.559
- 3.048
- 3.034
- 3.020
- 1.964
- 1.855
- 1.831
- 1.820
- 1.811
- 1.800
- 1.784
- 1.774
- 1.763
- 1.757
- 1.739
- 1.722
- 1.616
- 1.587
- 0.910
- 0.909
- 0.096
- 0.073
- 0.068

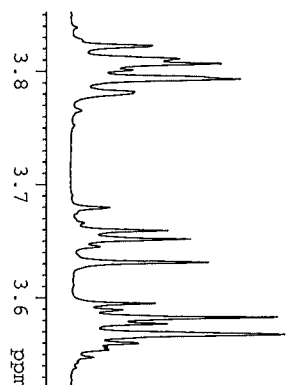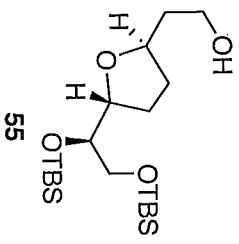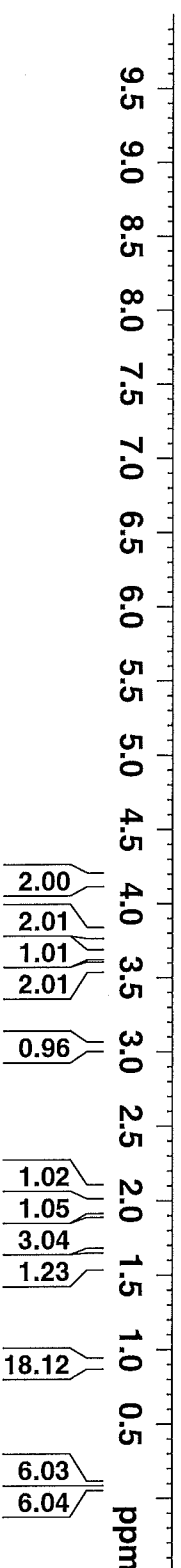

```

NAME          SUM-XI-83-R-Alcohol
EXPNO         1
PROCNO        1
Date_         20110614
Time          19.58
INSTRUM       robinson
PROBHD        5 mm PABBO BB-
PULPROG       zg30
TD            32768
SOLVENT       CDCl3
NS            32
DS            2
SWH           6793.478 Hz
FIDRES       0.207320 Hz
AQ           2.4117749 sec
RG           128
DW           73.600 usec
DE           6.50 usec
TE           298.3 K
D1           2.00000000 sec
TD0          1

===== CHANNEL f1 =====
NUC1          1H
P1           14.00 usec
PL1          0.00 dB
SF01         400.1424008 MHz
SI           32768
SF           400.1400000 MHz
WDW          EM
SSB          0
LB           0.30 Hz
GB           0
PC           1.00
  
```

Alcohol

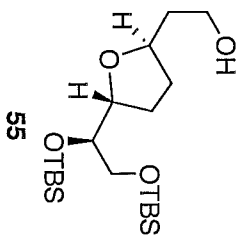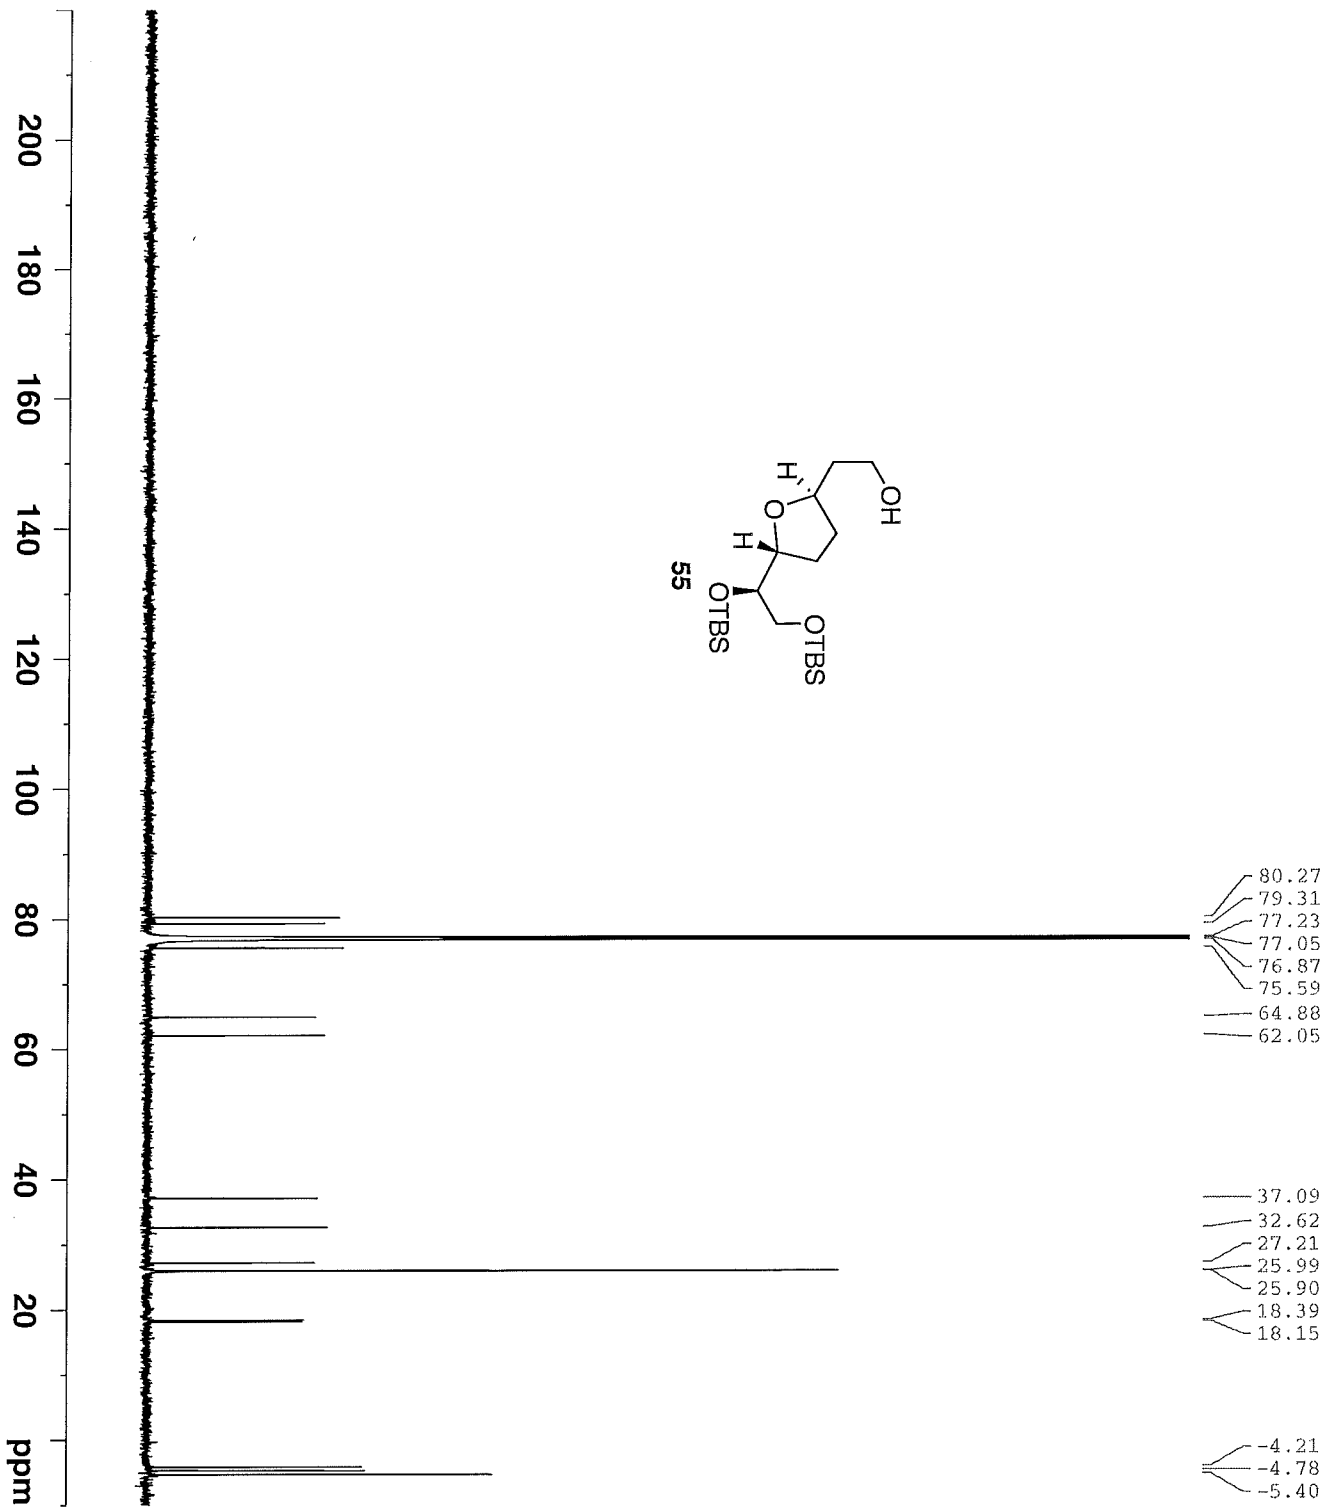

- 80.27
- 79.31
- 77.23
- 77.05
- 76.87
- 75.59
- 64.88
- 62.05
- 37.09
- 32.62
- 27.21
- 25.99
- 25.90
- 18.39
- 18.15
- 4.21
- 4.78
- 5.40

```

NAME SUM-XI-83-Alcohol
EXPNO 2
PROCNO 1
Date_ 20110614
Time 19.34
INSTRUM spect
PROBHD 5 mm CPDCH 13C
PULPROG zgpg30
TD 98304
SOLVENT CDCl3
NS 161
DS 4
SWH 41666.668 Hz
FIDRES 0.423855 Hz
AQ 1.1796980 sec
RG 203
DW 12.000 us
DE 15.00 us
TE 298.2 K
D1 2.00000000 sec
D11 0.03000000 sec
TD0 1

===== CHANNEL f1 =====
NUC1 13C
P1 9.00 us
PL1 4.50 dB
PL1W 38.14553833 W
SFO1 176.0637988 MHz

===== CHANNEL f2 =====
CPDPRG2 waltz16
NUC2 1H
PCPD2 65.00 us
PL2 -3.20 dB
PL12 13.60 dB
PL13 120.00 dB
PL2W 33.59817505 W
PL12W 0.70196527 W
PL13W 0.00000000 W
SFO2 700.1228005 MHz
SI 131072
SF 176.0453140 MHz
WDW EM
SSB 0
LB 3.00 Hz
GB 0
PC 1.40
  
```



a1coho1

- 7.361
- 7.355
- 7.298
- 7.292
- 7.286
- 4.532
- 4.170
- 4.164
- 4.159
- 4.154
- 4.149
- 3.931
- 3.888
- 3.666
- 3.661
- 3.649
- 3.589
- 3.581
- 3.576
- 3.572
- 3.403
- 3.394
- 3.390
- 3.381
- 3.322
- 3.313
- 3.309
- 3.300
- 2.080
- 2.071
- 1.652
- 1.632
- 1.597
- 1.550
- 1.531
- 1.516
- 1.284
- 1.250
- 1.013
- 1.004
- 0.915
- 0.911
- 0.102
- 0.099
- 0.073
- 0.070

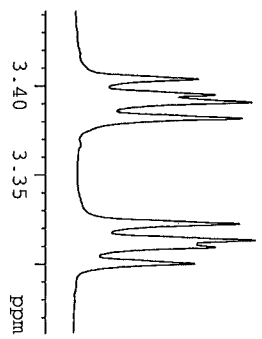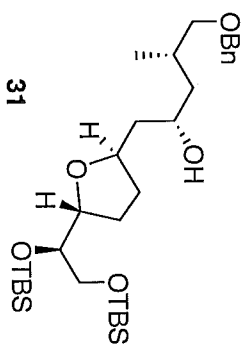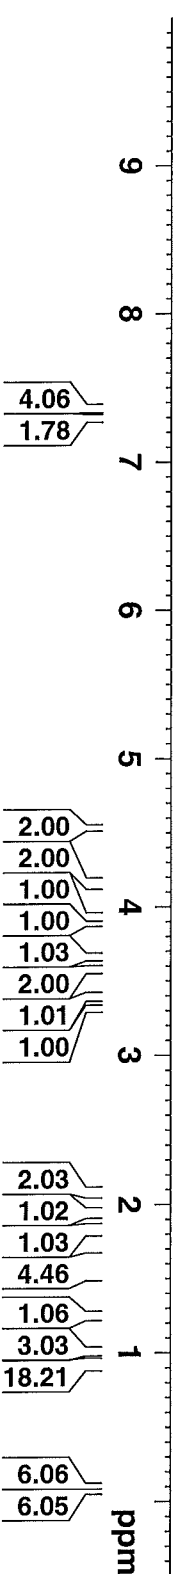

```

SUM-XIV-22-Alcoho.
NAME          SUM-XIV-22-Alcoho.
EXPNO         1
PROCNO        1
Date_         20111023
Time_         22.28
INSTRUM       spect
PROBHD        5 mm PABBO BB-
PULPROG       zg30
TD            95236
SOLVENT       CDCl3
NS            32
DS            2
SWH           11904.762 Hz
FIDRES        0.125003 Hz
AQ            3.9999621 sec
RG            128
DW            42.000 usec
DE            6.50 usec
TE            299.0 K
D1            2.00000000 sec
TD0           1

===== CHANNEL f1 =====
NUC1          1H
P1            13.75 usec
PL1          -3.00 dB
PL1W         32.08600616 W
SFO1         700.1516910 MHz
SI           131072
SF           700.1471400 MHz
WDW           EM
SSB           0
LB           0.30 Hz
GB           0
PC           1.00
  
```

alcohol

- 138.78
- 128.28
- 127.53
- 127.37
- 80.03
- 79.46
- 77.18
- 77.00
- 76.82
- 76.47
- 75.72
- 72.88
- 69.47
- 65.01
- 43.32
- 42.10
- 33.09
- 30.22
- 26.99
- 25.98
- 25.91
- 18.34
- 18.12
- 17.33
- 4.25
- 4.77
- 5.38

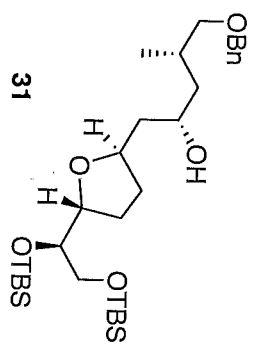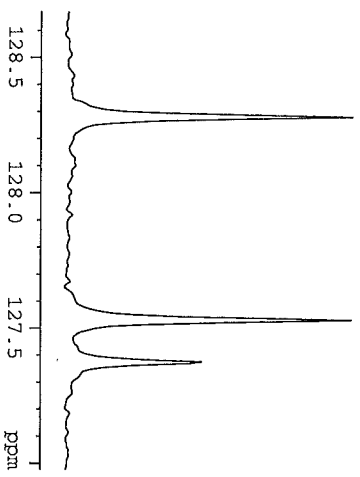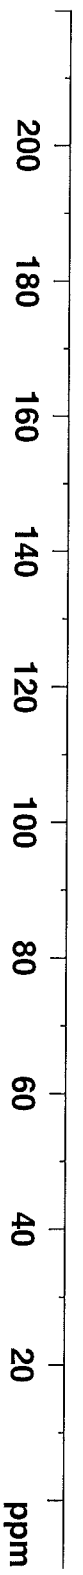

NAME SUM-XIV-22-Alcohol  
 EXPNO 2  
 PROCNO 1  
 Date\_ 20111023  
 Time 23.20  
 INSTRUM spect  
 PROBHD 5 mm PABBO BB-  
 PULPROG zgpg30  
 TD 65536  
 SOLVENT CDCl3  
 NS 1024  
 DS 4  
 SWH 41666.668 Hz  
 FIDRES 0.635783 Hz  
 AQ 0.7864820 sec  
 RG 203  
 DW 12.000 usec  
 DE 6.50 usec  
 TE 300.4 K  
 D1 2.00000000 sec  
 D11 0.03000000 sec  
 TD0 1

==== CHANNEL F1 =====  
 NUC1 13C  
 P1 9.30 usec  
 PL1 2.00 dB  
 PL1W 67.83342743 W  
 SFO1 176.0706238 MHZ

==== CHANNEL F2 =====  
 CPDPRG2 waltz16  
 NUC2 1H  
 PCPD2 80.00 usec  
 PL2 -3.00 dB  
 PL12 12.30 dB  
 PL13 12.30 dB  
 PL1W 32.08600616 W  
 PL12W 0.94692516 W  
 PL13W 0.94692516 W  
 SFO2 700.1499406 MHZ  
 SI 32768  
 SF 176.0521380 MHZ  
 WDW EM  
 SSB 0  
 LB 3.00 Hz  
 GB 0  
 PC 1.40

Ketone

|       |       |       |       |       |       |       |       |       |       |       |       |       |       |       |       |       |       |       |       |       |       |       |       |       |       |       |       |       |       |       |       |       |       |       |       |       |       |       |       |       |       |       |       |       |       |
|-------|-------|-------|-------|-------|-------|-------|-------|-------|-------|-------|-------|-------|-------|-------|-------|-------|-------|-------|-------|-------|-------|-------|-------|-------|-------|-------|-------|-------|-------|-------|-------|-------|-------|-------|-------|-------|-------|-------|-------|-------|-------|-------|-------|-------|-------|
| 7.366 | 7.356 | 7.345 | 7.343 | 7.288 | 4.499 | 4.084 | 4.079 | 3.663 | 3.658 | 3.646 | 3.569 | 3.566 | 3.564 | 3.560 | 3.362 | 3.354 | 3.349 | 3.341 | 3.292 | 3.282 | 3.279 | 3.269 | 2.738 | 2.729 | 2.716 | 2.707 | 2.644 | 2.636 | 2.621 | 2.613 | 2.526 | 2.517 | 2.504 | 2.495 | 2.364 | 2.353 | 2.341 | 2.330 | 0.965 | 0.955 | 0.908 | 0.091 | 0.084 | 0.068 | 0.065 |
|-------|-------|-------|-------|-------|-------|-------|-------|-------|-------|-------|-------|-------|-------|-------|-------|-------|-------|-------|-------|-------|-------|-------|-------|-------|-------|-------|-------|-------|-------|-------|-------|-------|-------|-------|-------|-------|-------|-------|-------|-------|-------|-------|-------|-------|-------|

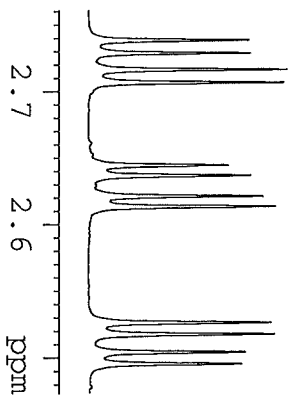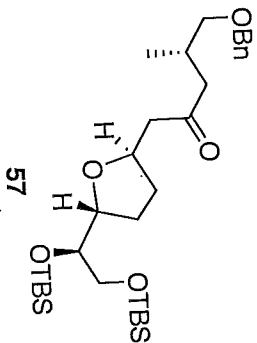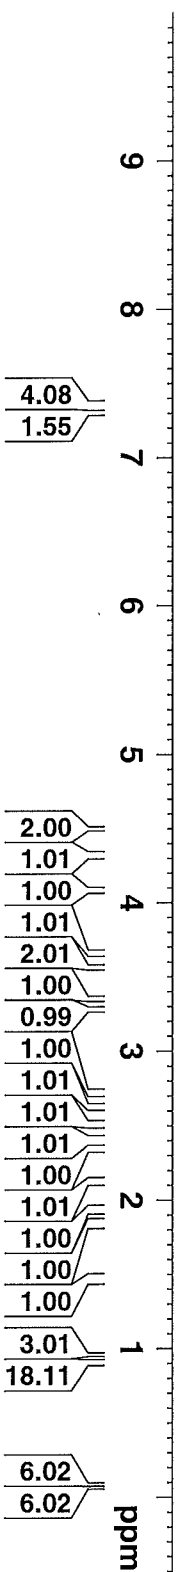

```

SUM-XV-16-Ketone
NAME          SUM-XV-16-Ketone
EXPNO         1
PROCNO        1
Date_         20120402
Time         0.27
INSTRUM       spect
PROBHD        5 mm CPDCH 13C
PULPROG       zg30
TD            95236
SOLVENT       CDCl3
NS            32
DS            2
SWH           11904.762 Hz
FIDRES        0.125003 Hz
AQ            3.9999621 sec
RG            40.3
DE            42.000 usec
TE            298.2 K
D1            2.00000000 sec
TD0           1

===== CHANNEL f1 =====
NUC1          1H
P1            9.40 usec
PL1          -3.20 dB
PL1W         33.59817505 W
SFO1         700.1516910 MHz
SI           131072
SF           700.1471400 MHz
WDW          EM
SSB          0
LB           0.30 Hz
GB           0
PC           1.00

```

Ketone

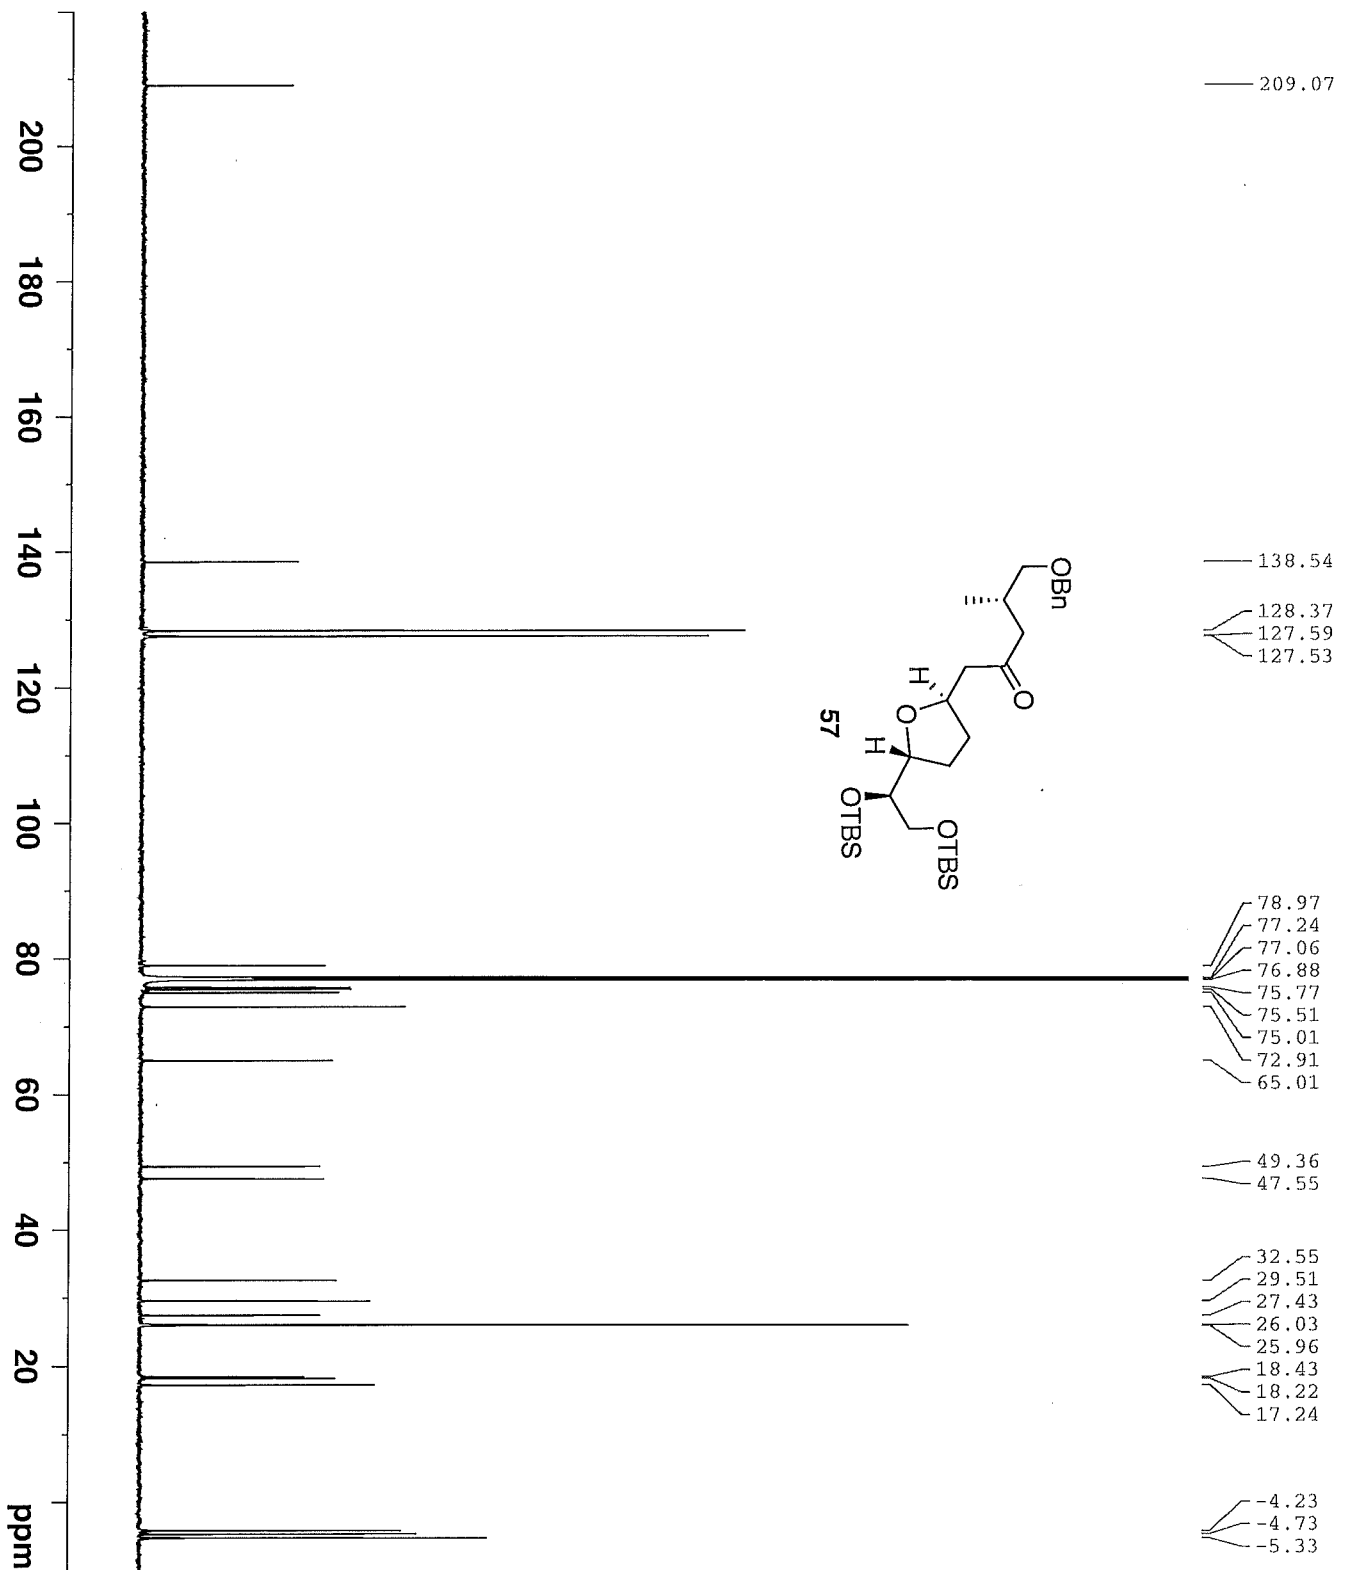

```

NAME SUM-XV-16-Ketone
EXPNO 2
PROCNO 1
Date_ 20120402
Time 0.36
INSTRUM spect
PROBHD 5 mm CPDCH 13C
PULPROG zgpg30
TD 65536
SOLVENT CDCl3
NS 206
DS 4
SWH 41666.668 Hz
FIDRES 0.635783 Hz
AQ 0.7864820 sec
RG 203
DW 12.000 usec
DE 16.50 usec
TE 298.2 K
D1 2.00000000 sec
D11 0.03000000 sec
TD0 1

===== CHANNEL F1 =====
NUC1 13C
P1 9.00 usec
PL1 4.50 dB
PL1W 38.14553833 W
SF01 176.0706238 MHz

===== CHANNEL F2 =====
CPDPRG2 waltz16
NUC2 1H
PCPD2 65.00 usec
PL2 -3.20 dB
PL12 13.60 dB
PL13 120.00 dB
PL2W 33.59817505 W
PL12W 0.70196527 W
PL13W 0.00000000 W
SF02 700.1499406 MHz
SI 32768
SF 176.0521380 MHz
WDW EM
SSB 0
LB 3.00 Hz
GB 0
PC 1.40
  
```

EE Ether

- 7.363
- 7.357
- 7.301
- 7.295
- 7.288
- 4.693
- 4.685
- 4.520
- 4.075
- 3.682
- 3.677
- 3.666
- 3.643
- 3.572
- 3.565
- 3.564
- 3.489
- 3.479
- 3.476
- 3.466
- 3.379
- 3.371
- 3.366
- 3.358
- 3.261
- 3.251
- 3.248
- 3.238
- 2.013
- 1.942
- 1.935
- 1.929
- 1.575
- 1.305
- 1.297
- 1.220
- 1.210
- 1.200
- 1.010
- 1.000
- 0.918
- 0.904
- 0.094
- 0.090
- 0.080
- 0.077

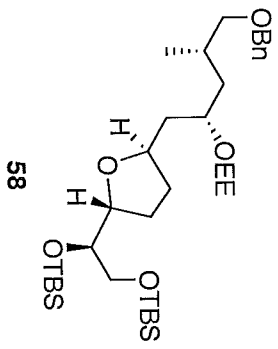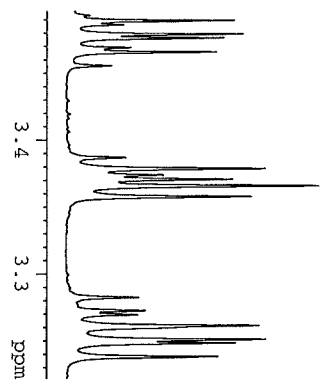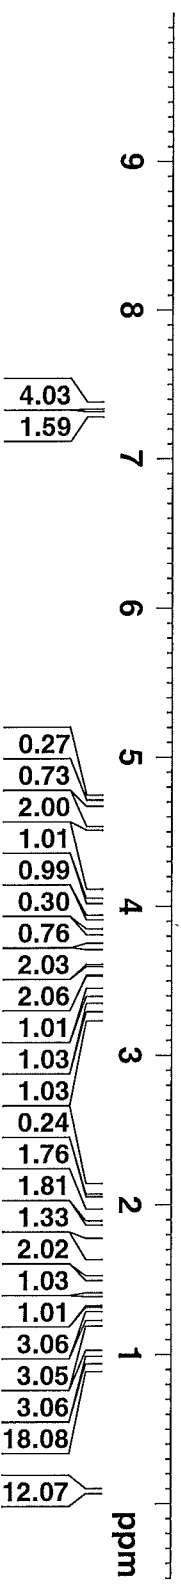

4.03  
1.59

0.27  
0.73  
2.00

1.01  
0.99  
0.30  
0.76

2.03  
2.06  
1.01  
1.03

1.03  
0.24  
1.76  
1.81

1.33  
2.02  
1.03  
1.01

3.06  
3.05  
3.06  
18.08

12.07

```

NAME          SDM-XV-19-EE Protecti
EXPNO         1
PROCNO        1
Date_         20120404
Time          13.22
INSTRUM       spect
PROBHD        5 mm CPDCH 13C
PULPROG       zg30
TD            95236
SOLVENT       CDCl3
NS            32
DS            2
SMH           11904.762 Hz
FIDRES        0.125003 Hz
AQ            3.9999621 sec
RG            22.6
DW            42.000 usec
DE            6.50 usec
TE            303.2 K
D1            2.00000000 sec
TD0           1

===== CHANNEL f1 =====
NUC1           1H
P1             9.40 usec
PL1           -3.20 dB
PL1W          33.59817505 W
SFO1          700.1516910 MHz
SI            131072
SF            700.1471400 MHz
WDW           EM
SSB           0
LB            0.30 Hz
GB            0
PC            1.00
  
```

- 138.89
- 138.79
- 128.31
- 128.28
- 127.57
- 127.42
- 127.36
- 99.65
- 98.39
- 78.66
- 78.52
- 77.22
- 77.04
- 76.86
- 76.45
- 76.35
- 76.27
- 76.09
- 72.92
- 72.88
- 72.84
- 71.95
- 65.12
- 60.77
- 60.55
- 41.88
- 41.22
- 39.08
- 38.62
- 33.23
- 32.99
- 29.83
- 29.73
- 27.39
- 27.36
- 26.03
- 25.95
- 20.96
- 20.79
- 18.44
- 18.18
- 17.39
- 17.08
- 15.43

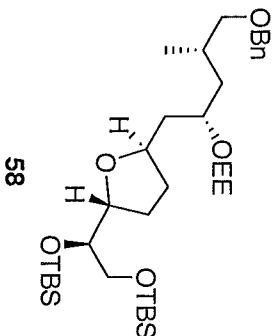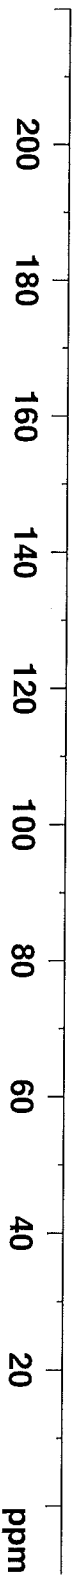

```

NAME          SUM-XV-19-EE Protecti
EXPNO         2
PROCNO        1
Date_         20120404
Time          13.36
INSTRUM       spect
PROBHD        5 mm CPDCH 13C
PULPROG       zgpg30
TD            65536
SOLVENT       CDCl3
NS            301
DS            4
SWH           41666.668 Hz
FIDRES        0.635783 Hz
AQ            0.7864820 sec
RG            203
DW            12.000 usec
DE            16.50 usec
TE            303.2 K
D1            2.00000000 sec
D11           0.03000000 sec
TD0           1

===== CHANNEL f1 =====
NUC1          13C
P1            9.00 usec
PL1           4.50 dB
PL1W          38.14553833 W
SFO1         176.0706238 MHz

===== CHANNEL f2 =====
CPDPRG2      waltz16
NUC2          1H
PCPD2        65.00 usec
PL2           -3.20 dB
PL12         13.60 dB
PL13         120.00 dB
PL1W         33.59817505 W
PL12W        0.70196527 W
PL13W        0.00000000 W
SFO2         700.1499406 MHz
SI           32768
SF           176.0521380 MHz
WDW          EM
SSB          0
LB           3.00 Hz
GB           0
PC           1.40
    
```

Sulfide

- 7.359
- 7.341
- 7.338
- 7.290
- 7.282
- 7.272
- 7.252
- 7.176
- 7.158
- 4.710
- 4.697
- 3.691
- 3.683
- 3.578
- 3.561
- 3.557
- 3.544
- 3.538
- 3.429
- 3.411
- 3.406
- 3.388
- 2.982
- 2.965
- 2.951
- 2.817
- 2.798
- 2.786
- 2.767
- 1.459
- 1.435
- 1.278
- 1.265
- 1.237
- 1.224
- 1.193
- 1.164
- 1.146
- 1.129
- 1.097
- 1.086
- 1.081
- 0.911
- 0.093
- 0.074
- 0.071

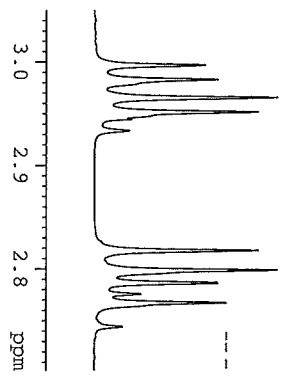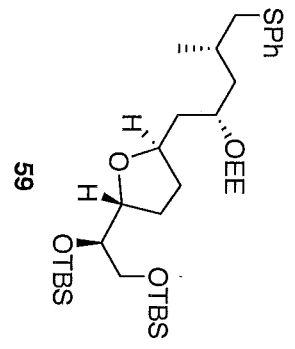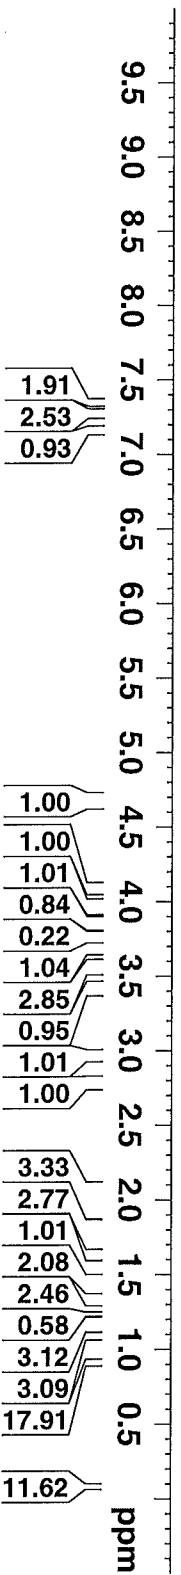

1.91  
2.53  
0.93

1.00  
1.00  
1.01  
0.84  
0.22  
1.04  
2.85  
0.95  
1.01  
1.00

3.33  
2.77  
1.01  
2.08  
2.46  
0.58  
3.12  
3.09  
17.91

11.62

```

NAME          SDM-XIV-56-R-Sulfide
EXPNO         1
PROCNO       1
Date_        20111127
Time         18.19
INSTRUM      robinson
PROBHD       5 mm PABBO BB-
PULPROG      zg30
TD           32768
SOLVENT      CDCl3
NS           32
DS           2
SWH          6793.478 Hz
FIDRES      0.207320 Hz
AQ          2.4117749 sec
RG          71.8
DW          73.600 usec
DE          6.50 usec
TE          298.2 K
D1          2.00000000 sec
TD0         1

===== CHANNEL f1 =====
NUC1         1H
P1          14.00 usec
PL1         0.00 dB
SFO1        400.1424008 MHz
SI          32768
SF          400.1400000 MHz
WDW         EM
SSB         0
LB          0.30 Hz
GB          0
PC          1.00
    
```

Sulfide

- 137.48
- 129.16
- 129.02
- 128.79
- 128.74
- 125.67
- 125.53
- 99.85
- 98.19
- 78.64
- 78.51
- 77.33
- 77.02
- 76.70
- 76.24
- 76.20
- 76.10
- 73.12
- 71.80
- 65.08
- 60.70
- 60.34
- 41.99
- 41.91
- 41.65
- 41.32
- 41.14
- 33.28
- 33.04
- 29.34
- 27.31
- 26.01
- 25.95
- 20.82
- 20.66
- 19.36
- 19.17
- 18.41
- 18.16
- 15.36
- 1

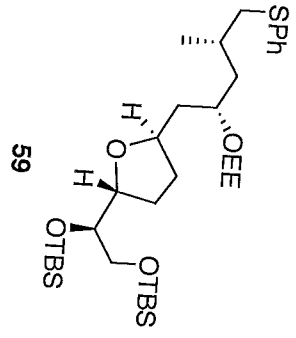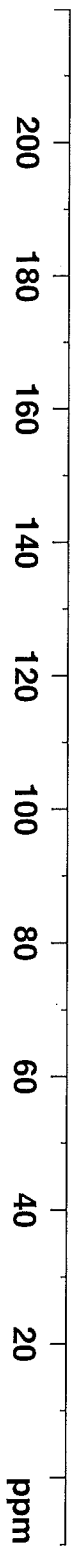

```

NAME SUM-XIV-56-R-Sulfic
EXPNO 2
PROCNO 1
Date_ 20111127
Time 18.26
INSTRUM robinson
PROBHD 5 mm PABBO BB-
PULPROG zgpg30
TD 65536
SOLVENT CDCl3
NS 2134
DS 4
SWH 23980.814 Hz
FIDRES 0.365918 Hz
AQ 1.3664756 sec
RG 23170.5
DW 20.850 usec
DE 298.6 K
TE 6.50 usec
D1 0.2000000 sec
D11 0.0300000 sec
TD0 1

===== CHANNEL f1 =====
NUC1 13C
P1 9.00 usec
PL1 -2.00 dB
SFO1 100.6258476 MHz

===== CHANNEL f2 =====
CPDPRG2 waltz16
NUC2 1H
PCPD2 90.00 usec
PL2 0.00 dB
PL12 16.16 dB
PL13 17.00 dB
SFO2 400.1416006 MHz
SI 32768
SF 100.6152830 MHz
WDW EM
SSB 0
LB 1.00 Hz
GB 0
PC 1.40
  
```



Sulfone

- 7.959
- 7.947
- 7.936
- 7.662
- 7.655
- 7.652
- 7.595
- 7.583
- 7.574
- 7.563
- 7.288
- 4.678
- 4.671
- 4.627
- 4.620
- 4.080
- 3.659
- 3.655
- 3.651
- 3.646
- 3.612
- 3.602
- 3.559
- 3.554
- 3.545
- 3.542
- 3.453
- 3.440
- 3.439
- 3.160
- 2.976
- 2.972
- 2.963
- 2.955
- 1.243
- 1.236
- 1.213
- 1.197
- 1.175
- 1.150
- 1.144
- 0.910
- 0.907
- 0.898
- 0.081
- 0.067

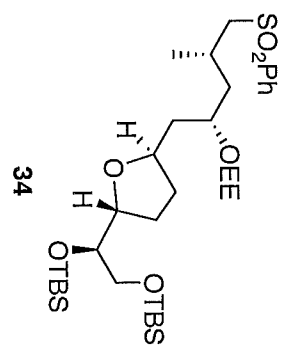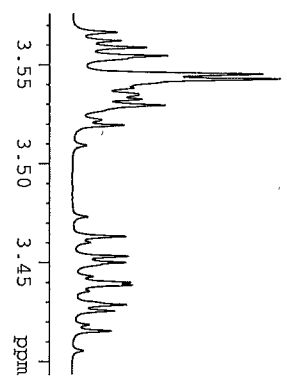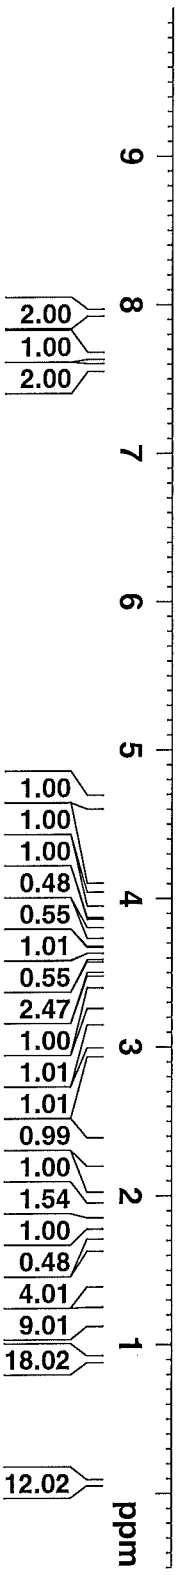

```

NAME          SUM-XIV-57-Sulfon
EXPNO         3
PROCNO        1
Date_         20111202
Time          14.36
INSTRUM       spect
PROBHD        5 mm PABBO BB-
PULPROG       zg30
TD            95236
SOLVENT       CDCl3
NS            32
DS            2
SWH           11904.762 Hz
FIDRES        0.125003 Hz
AQ            3.9999621 sec
RG            128
DE            42.000 usec
TE            298.0 K
D1            2.00000000 sec
TD0           1

===== CHANNEL f1 =====
NUC1          1H
P1            13.75 usec
PL1           -3.00 dB
PL1W          32.08600616 W
SFO1          700.1516910 MHz
SI            131072
SF            700.1471400 MHz
WDW           EM
SSB           0
LB            0.30 Hz
GB            0
PC            1.00
  
```

Sulfone

4

|        |       |
|--------|-------|
| 140.20 | 99.98 |
| 140.07 | 97.95 |
| 133.50 | 78.61 |
| 133.37 | 78.52 |
| 129.24 | 77.20 |
| 129.14 | 77.02 |
| 128.04 | 76.84 |
| 128.00 | 76.06 |
|        | 75.98 |
|        | 72.99 |
|        | 71.19 |
|        | 65.06 |
|        | 63.26 |
|        | 63.20 |
|        | 60.74 |
|        | 60.61 |
|        | 41.82 |
|        | 41.71 |
|        | 41.58 |
|        | 40.77 |
|        | 33.26 |
|        | 33.07 |
|        | 27.32 |
|        | 27.29 |
|        | 26.00 |
|        | 25.93 |
|        | 25.86 |
|        | 25.83 |
|        | 20.75 |
|        | 20.59 |
|        | 19.88 |
|        | 19.69 |
|        | 18.42 |
|        | 18.15 |
|        | 15.45 |

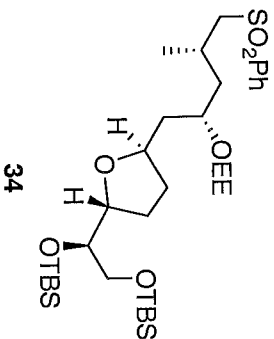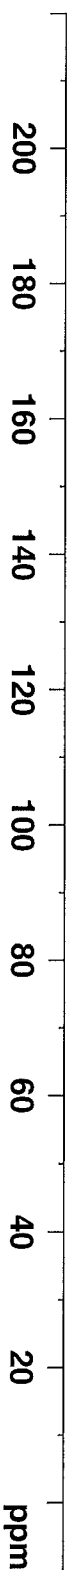

```

NAME          SUM-XIV-57-Sulfon
EXPNO         4
PROCNO        1
Date_         20111202
Time          14.54
INSTRUM       spect
PROBHD        5 mm PABBO BB-
PULPROG       zgpg30
TD            65536
SOLVENT       CDCl3
NS            928
DS            4
SMT          41666.668 Hz
FIDRES       0.635783 Hz
AQ           0.7864820 sec
RG           203
DW           12.000 usec
DE           6.50 usec
TE           298.4 K
D1           2.00000000 sec
D11          0.03000000 sec
TD0          1

===== CHANNEL F1 =====
NUC1          13C
P1           9.30 usec
PL1          2.00 dB
PL1W         67.83342743 W
SF01         176.0706238 MH:

===== CHANNEL F2 =====
CPDPRG2      waltz16
NUC2          1H
PCPD2        80.00 usec
PL2          -3.00 dB
PL12         12.30 dB
PL13         12.30 dB
PL2W         32.08600616 W
PL12W        0.94692516 W
PL13W        0.94692516 W
SF02         700.1499406 MH:
SI           32768
SF           176.0521380 MH:
WDW          EM
SSB          0
LB           3.00 Hz
GB           0
PC           1.40
  
```

Alcohol

- 7.946
- 7.944
- 7.657
- 7.586
- 7.576
- 7.575
- 7.288
- 4.682
- 4.674
- 3.670
- 3.668
- 3.666
- 3.600
- 3.590
- 3.535
- 3.525
- 3.522
- 3.512
- 3.440
- 3.430
- 3.427
- 3.417
- 3.241
- 3.234
- 3.221
- 3.214
- 2.998
- 2.987
- 2.978
- 2.967
- 2.471
- 2.462
- 1.773
- 1.771
- 1.765
- 1.753
- 1.474
- 1.462
- 1.458
- 1.254
- 1.246
- 1.173
- 1.135
- 1.125
- 0.921
- 0.113

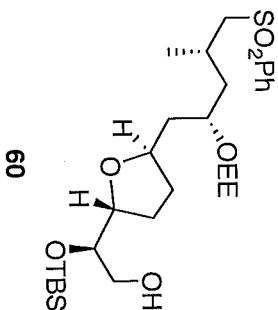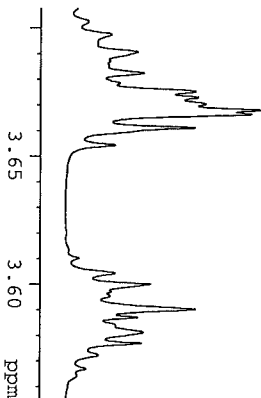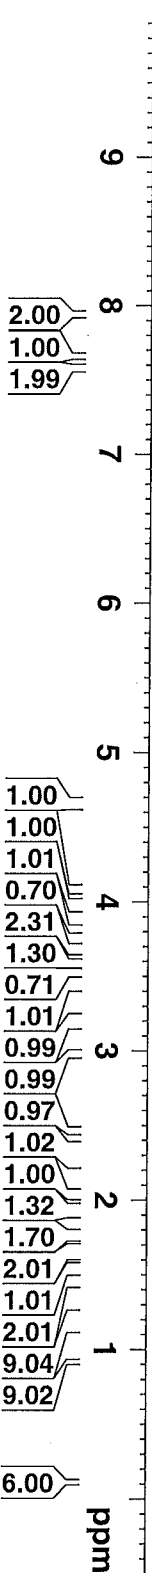

```

SUM-XIV-59-Alcohol:
NAME          3
EXPNO         1
PROCNO        1
Date_         20120105
Time          9.59
INSTRUM      spect
PROBHD       5 mm PABBO BB-
PULPROG      zg30
TD           95236
SOLVENT      CDCl3
NS           32
DS           2
SWMH         11904.762 Hz
FIDRES       0.125003 Hz
AQ           3.9999621 se
RG           144
DW           42.000 us
DE           6.50 us
TE           298.9 K
D1           2.00000000 se
TD0          1

===== CHANNEL f1 =====
NUC1          1H
P1           13.75 us
PL1          -3.00 dB
PL1W         32.08600616 W
SF01         700.1516910 MH:
SI           131072
SF          700.1471400 MH:
WDW          EM
SSB          0
LB           0.30 Hz
GB           0
PC           1.00

```

Alcohol

- 140.17
- 140.06
- 133.54
- 133.42
- 129.26
- 129.17
- 128.02
- 127.97
- 99.99
- 97.78
- 80.48
- 80.35
- 77.21
- 77.03
- 76.85
- 76.37
- 76.28
- 74.47
- 74.42
- 72.84
- 70.78
- 64.62
- 63.13
- 63.10
- 60.51
- 60.35
- 41.75
- 41.59
- 40.61
- 32.92
- 32.71
- 27.56
- 25.88
- 25.81
- 25.78
- 20.59
- 20.50
- 20.06
- 19.78
- 18.17
- 15.41
- 15.36
- 4.50

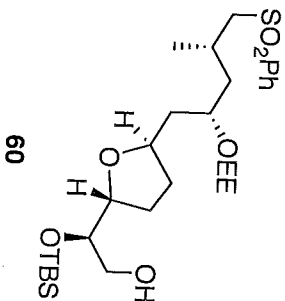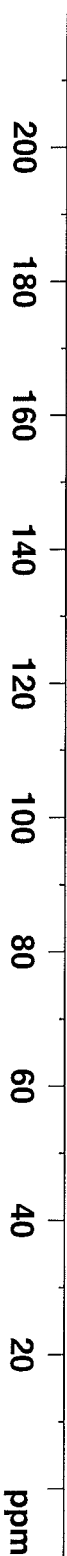

```

NAME SUM-XIV-59-Alcohol
EXPNO 4
PROCNO 1
Date_ 20120105
Time 10.11
INSTRUM spect
PROBHD 5 mm PABBO BB-
PULPROG zgpg30
TD 65536
SOLVENT CDCl3
NS 696
DS 4
SWH 41666.668 Hz
FIDRES 0.635783 Hz
AQ 0.7864820 sec
RG 203
DW 12.000 usec
DE 6.50 usec
TE 298.7 K
D1 2.00000000 sec
D11 0.03000000 sec
TD0 1

===== CHANNEL f1 =====
NUC1 13C
P1 9.30 usec
PL1 2.00 dB
PL1W 67.83342743 W
SF01 176.0706235 MHz

===== CHANNEL f2 =====
CPDPRG2 waltz16
NUC2 1H
PCPD2 80.00 usec
PL2 -3.00 dB
PL12 12.30 dB
PL13 12.30 dB
PL1W 32.08600616 W
PL12W 0.94692516 W
PL13W 0.94692516 W
SF02 700.1499406 MHz
SI 32768
SF 176.0521380 MHz
WDW EM
SSB 0
LB 3.00 Hz
GB 0
PC 1.40
  
```

Sidearm Diene

|       |
|-------|
| 7.962 |
| 7.950 |
| 7.939 |
| 7.666 |
| 7.657 |
| 7.588 |
| 7.586 |
| 7.577 |
| 7.288 |
| 6.458 |
| 5.846 |
| 5.830 |
| 4.677 |
| 4.670 |
| 4.638 |
| 4.630 |
| 4.161 |
| 3.939 |
| 3.928 |
| 3.920 |
| 3.535 |
| 3.448 |
| 3.446 |
| 3.438 |
| 3.435 |
| 3.247 |
| 3.240 |
| 2.982 |
| 2.972 |
| 2.962 |
| 1.874 |
| 1.797 |
| 1.774 |
| 1.433 |
| 1.249 |
| 1.241 |
| 1.197 |
| 1.181 |
| 1.157 |
| 1.150 |
| 1.148 |
| 0.921 |
| 0.920 |
| 0.079 |
| 0.078 |
| 0.057 |

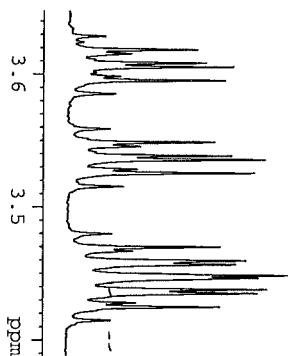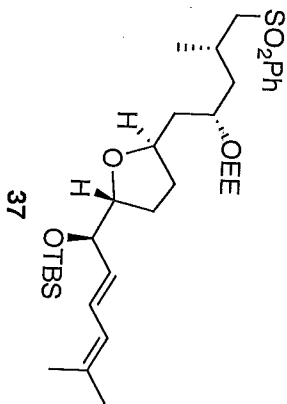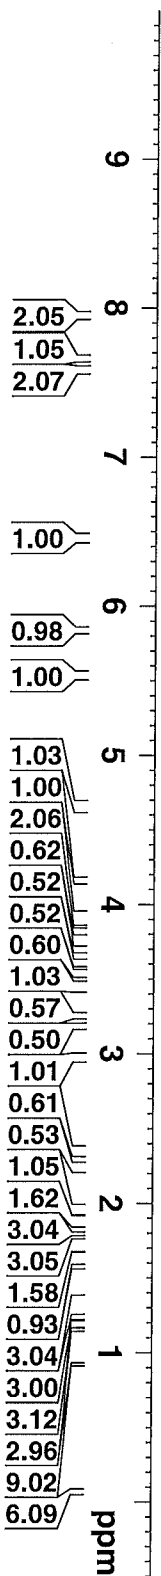

NAME SUM-XIV-61-Diene  
 EXPNO 1  
 PROCNO 1  
 Date\_ 20120107  
 Time 14.22  
 INSTRUM spect  
 PROBD 5 mm PABBO BB-  
 PULPROG zg30  
 TD 95236  
 SOLVENT CDCl3  
 NS 32  
 DS 2  
 SWH 11904.762 Hz  
 FIDRES 0.125003 Hz  
 AQ 3.9999621 sec  
 RG 203  
 DW 42.000 usec  
 DE 6.50 usec  
 TE 298.9 K  
 D1 2.00000000 sec  
 TD0 1

==== CHANNEL f1 =====  
 NUC1 1H  
 P1 13.75 usec  
 PL1 -3.00 dB  
 PL1W 32.08600616 W  
 SFO1 700.1516910 MHz  
 SI 131072  
 SF 700.1471400 MHz  
 WDW EM  
 SSB 0  
 LB 0.30 Hz  
 GB 0  
 PC 1.00

- 140.21
- 140.08
- 135.04
- 133.52
- 133.39
- 129.97
- 129.95
- 129.25
- 129.16
- 128.03
- 127.98
- 127.45
- 124.70
- 99.94
- 98.00
- 82.12
- 82.08
- 77.20
- 77.02
- 76.84
- 76.02
- 75.72
- 75.67
- 72.89
- 71.12
- 63.19
- 63.12
- 60.69
- 60.59
- 41.89
- 41.72
- 41.64
- 40.77
- 32.97
- 32.74
- 27.24
- 27.21
- 25.98
- 25.89
- 20.70
- 20.58
- 20.00
- 19.77
- 18.27
- 15.45
- 15.35
- 4.44

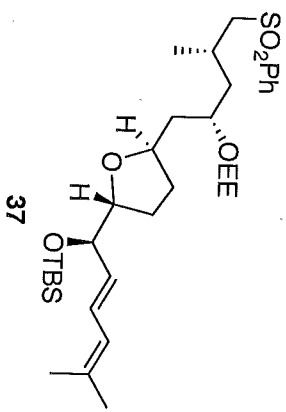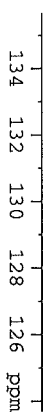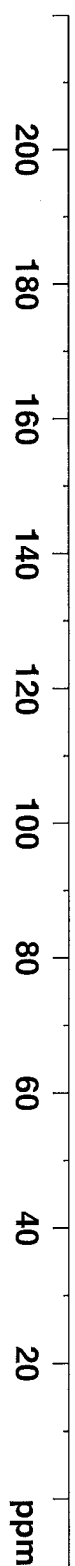

```

NAME          SUM-XIV-61-Diene
EXPNO         5
PROCNO        1
Date_         20120107
Time          15.54
INSTRUM       spect
PROBHD        5 mm PABBO BB-
PULPROG       zgpg30
TD            65536
SOLVENT       CDCl3
NS            5000
DS            4
SWH           41666.668 Hz
FIDRES        0.635783 Hz
AQ            0.7864820 sec
RG            203
DE            12.000 usec
TE            299.0 K
D1            2.00000000 sec
D11           0.03000000 sec
TD0           1

===== CHANNEL F1 =====
NUC1          13C
P1            9.30 usec
PL1           2.00 dB
PLLW          67.83342743 W
SFO1          176.0706238 MHz

===== CHANNEL F2 =====
CPDPRG2      waltz16
NUC2          1H
PCPD2        80.00 usec
PL2           -3.00 dB
PL12         12.30 dB
PL13         12.30 dB
PL2W         32.08600616 W
PL12W        0.94692516 W
PL13W        0.94692516 W
SFO2          700.1499406 MHz
SI           32768
SF           176.0521380 MHz
WDW          EM
SSB          0
LB           3.00 Hz
GB           0
PC           1.40
    
```

|       |         |
|-------|---------|
| 7.957 | Sulfone |
| 7.945 |         |
| 7.933 |         |
| 7.661 |         |
| 7.652 |         |
| 7.583 |         |
| 7.581 |         |
| 7.572 |         |
| 7.288 |         |
| 5.837 |         |
| 5.822 |         |
| 4.671 |         |
| 4.664 |         |
| 4.634 |         |
| 4.627 |         |
| 4.155 |         |
| 3.934 |         |
| 3.926 |         |
| 3.916 |         |
| 3.532 |         |
| 3.446 |         |
| 3.436 |         |
| 3.244 |         |
| 3.237 |         |
| 2.978 |         |
| 2.976 |         |
| 2.967 |         |
| 2.956 |         |
| 1.792 |         |
| 1.772 |         |
| 1.244 |         |
| 1.237 |         |
| 1.229 |         |
| 1.221 |         |
| 1.193 |         |
| 1.177 |         |
| 0.976 |         |
| 0.965 |         |
| 0.965 |         |
| 0.954 |         |
| 0.627 |         |
| 0.617 |         |
| 0.616 |         |
| 0.605 |         |
| 0.604 |         |
| 0.593 |         |

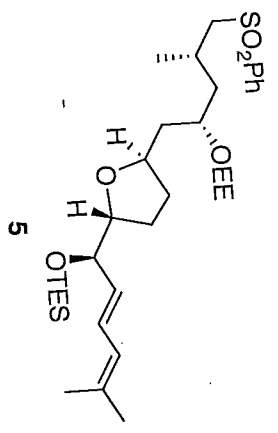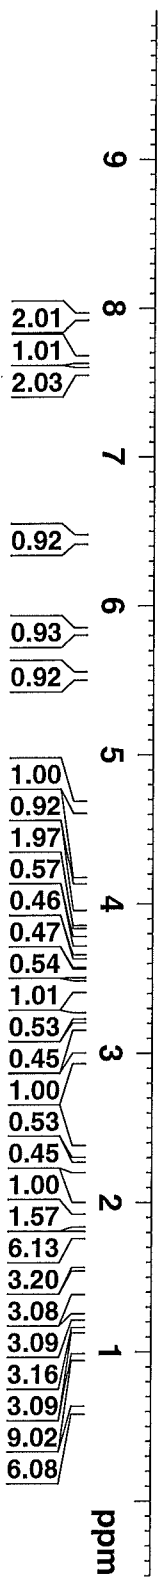

```

NAME          SUM-XIV-63-Diene
EXPNO         1
PROCNO        1
Date_         20120109
Time          18.08
INSTRUM       spect
PROBHD        5 mm PABBO BB-
PULPROG       zg30
TD            95236
SOLVENT       CDCl3
NS            32
DS            2
SWH           11904.762 Hz
FIDRES        0.125003 Hz
AQ            3.9999621 se
RG            101
DW            42.000 usec
DE            6.50 usec
TE            298.7 K
D1            2.00000000 sec
TD0           1

===== CHANNEL f1 =====
NUC1          1H
P1            13.75 usec
PL1          -3.00 dB
PL1W         32.08600616 W
SF01         700.1516910 MH:
SI           131072
SF           700.1471400 MH:
WDW          EM
SSB           0
LB           0.30 Hz
GB           0
PC           1.00

```

- 140.21
- 140.08
- 135.13
- 135.11
- 133.51
- 133.39
- 129.96
- 129.95
- 129.25
- 129.15
- 128.02
- 127.97
- 127.54
- 127.53
- 124.68
- 99.89
- 98.02
- 82.12
- 82.07
- 77.21
- 77.03
- 76.85
- 76.00
- 75.68
- 75.63
- 72.86
- 71.14
- 63.17
- 63.10
- 60.68
- 60.59
- 41.92
- 41.71
- 41.65
- 40.77
- 32.92
- 32.70
- 27.32
- 27.30
- 25.99
- 25.87
- 20.69
- 20.57
- 19.98
- 19.74
- 18.28
- 15.44
- 15.34
- 5.89
- 5.01

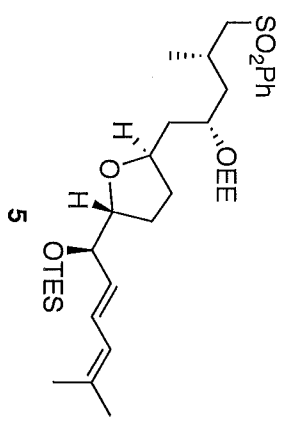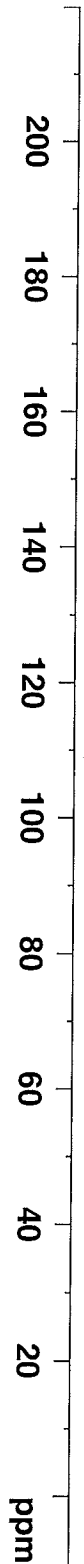

```

NAME SUM-XIV-63-Diene
EXPNO 2
PROCNO 1
Date_ 20120109
Time 18.16
INSTRUM spect
PROBHD 5 mm PABBO BB-
PULPROG zgpg30
TD 65536
SOLVENT CDCl3
NS 2449
DS 4
SWH 41666.668 Hz
FIDRES 0.635783 Hz
AQ 0.7864820 sec
RG 203
DW 12.000 usec
DE 6.50 usec
TE 299.1 K
D1 2.00000000 sec
D11 0.03000000 sec
TD0 1

===== CHANNEL f1 =====
NUC1 13C
P1 9.30 usec
PL1 2.00 dB
PL1W 67.83342743 W
SFO1 176.076238 MH:

===== CHANNEL f2 =====
CPDPRG2 waltz16
NUC2 1H
PCPD2 80.00 usec
PL2 -3.00 dB
PL12 12.30 dB
PL13 12.30 dB
PL2W 32.08600616 W
PL12W 0.94692516 W
PL13W 0.94692516 W
SFO2 700.1499406 MH:
SI 32768
SF 176.0521380 MH:
WDW EM
SSB 0
LB 3.00 Hz
GB 0
PC 1.40
    
```



Coupled Sulfone

|       |       |       |       |       |       |       |       |       |       |       |       |       |       |       |       |       |       |       |       |       |       |       |       |       |       |       |       |       |       |       |       |       |       |       |       |       |       |       |       |       |       |       |       |       |       |
|-------|-------|-------|-------|-------|-------|-------|-------|-------|-------|-------|-------|-------|-------|-------|-------|-------|-------|-------|-------|-------|-------|-------|-------|-------|-------|-------|-------|-------|-------|-------|-------|-------|-------|-------|-------|-------|-------|-------|-------|-------|-------|-------|-------|-------|-------|
| 7.941 | 7.929 | 7.895 | 7.631 | 7.566 | 7.554 | 7.288 | 6.458 | 5.839 | 5.540 | 5.519 | 5.317 | 5.315 | 4.145 | 4.100 | 3.899 | 3.888 | 3.571 | 1.901 | 1.887 | 1.849 | 1.794 | 1.791 | 1.772 | 1.682 | 1.671 | 1.435 | 1.268 | 1.261 | 1.214 | 1.213 | 1.210 | 1.170 | 1.160 | 1.138 | 1.131 | 1.090 | 0.976 | 0.967 | 0.966 | 0.937 | 0.914 | 0.873 | 0.621 | 0.090 | 0.066 |
|-------|-------|-------|-------|-------|-------|-------|-------|-------|-------|-------|-------|-------|-------|-------|-------|-------|-------|-------|-------|-------|-------|-------|-------|-------|-------|-------|-------|-------|-------|-------|-------|-------|-------|-------|-------|-------|-------|-------|-------|-------|-------|-------|-------|-------|-------|

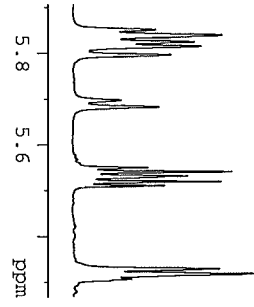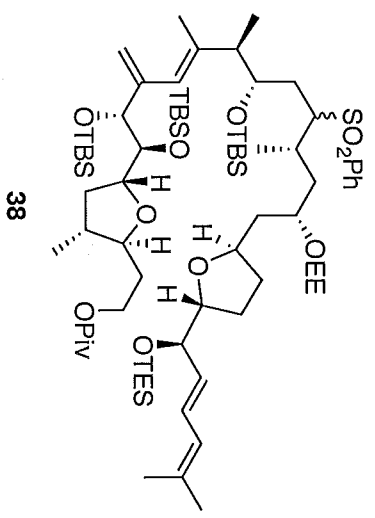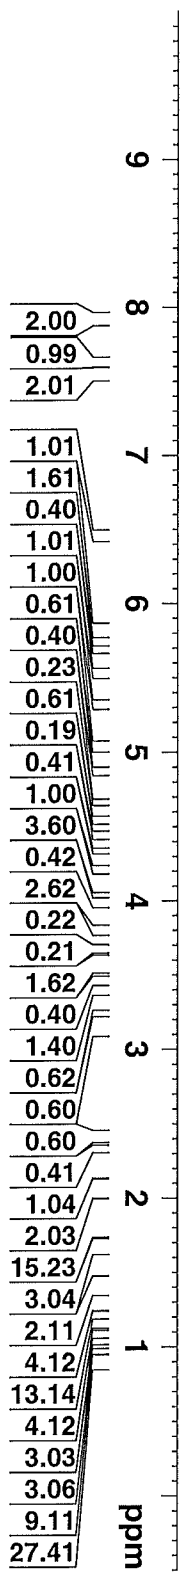

```

NAME          SUM-XV-34-Coupled Sulfo
EXPNO         1
PROCNO        1
Date_         20120412
Time          22:43
INSTRUM       spect
PROBHD        5 mm CPDCH 13C
PULPROG       zg30
TD            95236
SOLVENT       CDCl3
NS            63
DS            2
SWH           11904.762 Hz
FIDRES        0.125003 Hz
AQ            3.9999621 sec
RG            22.6
DW            42.000 usec
DE            6.50 usec
TE            303.2 K
D1            2.00000000 sec
TD0           1

===== CHANNEL f1 =====
NUC1          1H
P1            9.40 usec
PL1          -3.20 dB
PL12         33.59817505 W
SFO1         700.1516910 MHz
SI           131072
SF           700.1471400 MHz
WDW          EM
SSB          0
LB           0.30 Hz
GB           0
PC           1.00
  
```

Coupled Sul fone

|        |
|--------|
| 178.44 |
| 145.51 |
| 135.09 |
| 133.12 |
| 129.92 |
| 129.21 |
| 129.13 |
| 129.09 |
| 129.07 |
| 128.94 |
| 128.32 |
| 127.43 |
| 124.67 |
| 82.20  |
| 79.67  |
| 79.52  |
| 79.29  |
| 78.86  |
| 77.21  |
| 77.03  |
| 76.85  |
| 76.29  |
| 76.19  |
| 76.11  |
| 75.86  |
| 75.80  |
| 75.70  |
| 72.41  |
| 62.16  |
| 62.10  |
| 61.17  |
| 40.36  |
| 40.33  |
| 38.69  |
| 38.18  |
| 33.19  |
| 33.09  |
| 32.88  |
| 32.64  |
| 29.72  |
| 27.59  |
| 27.21  |
| 26.16  |
| 26.02  |
| 25.97  |
| 25.91  |
| 20.55  |
| 18.46  |
| 18.37  |
| 18.28  |
| 18.18  |
| 18.07  |
| 17.99  |
| 16.02  |
| 15.98  |
| 15.43  |
| 15.29  |
| 6.93   |
| 6.92   |
| 5.00   |
| -3.87  |
| -4.16  |
| -4.18  |
| -4.28  |
| -4.35  |
| -4.43  |
| -4.58  |
| -4.65  |
| -4.70  |

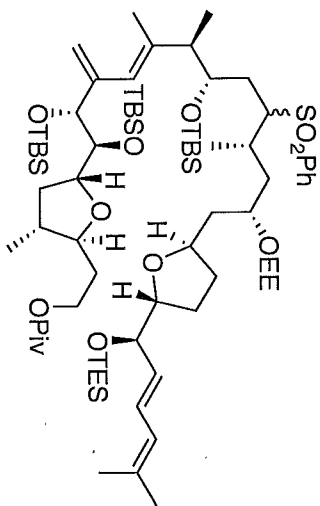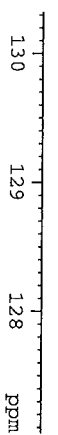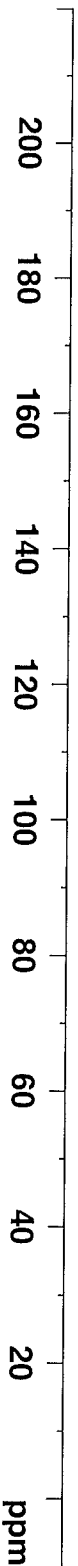

```

NAME          SUM-XV-34-Coupled Sulfo
EXPNO         2
PROCNO        1
Date_         20120412
Time          22.54
INSTRUM       spect
PROBHD        5 mm CPDCH 13C
PULPROG       zgpg30
TD            65536
SOLVENT       CDCl3
NS            5120
DS            4
SWH           41666.668 Hz
FIDRES        0.635783 Hz
AQ            0.7864820 sec
RG            203
DE            12.000 usec
TE            303.2 K
D1            2.00000000 sec
D11           0.03000000 sec
TD0           13

===== CHANNEL f1 =====
NUC1          13C
P1            9.00 usec
PL1           4.50 dB
PL1W          38.14553833 W
SFO1          176.0706238 MHz

===== CHANNEL f2 =====
CPDPRG2      waltz16
NUC2          1H
PCPD2        65.00 usec
PL2           -3.20 dB
PL12         13.60 dB
PL13         120.00 dB
PL1W          33.59817505 W
PL12W         0.70196527 W
PL13W         0.00000000 W
SFO2          700.1489406 MHz
SI            32768
SF            176.0521380 MHz
WDW           EM
SSB           0
LB            3.00 Hz
GB            0
PC            1.40
  
```

Ketone

7.288  
8.842  
5.842  
5.594  
5.320  
4.960  
4.669  
4.662  
4.157  
4.079  
3.933  
3.923  
3.647  
3.637  
3.524  
3.513  
3.336  
3.332  
1.884  
1.880  
1.873  
1.818  
1.793  
1.774  
1.665  
1.432  
1.298  
1.290  
1.205  
1.090  
1.080  
1.051  
1.041  
0.981  
0.969  
0.958  
0.908  
0.905  
0.904  
0.892  
0.623  
0.622  
0.612  
0.611  
0.081  
0.070  
0.023

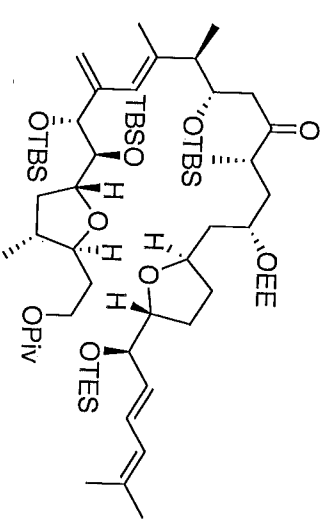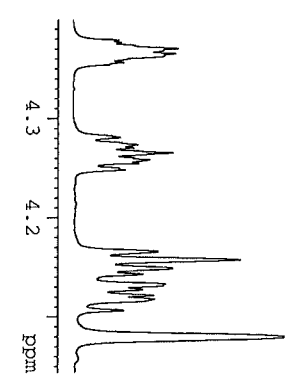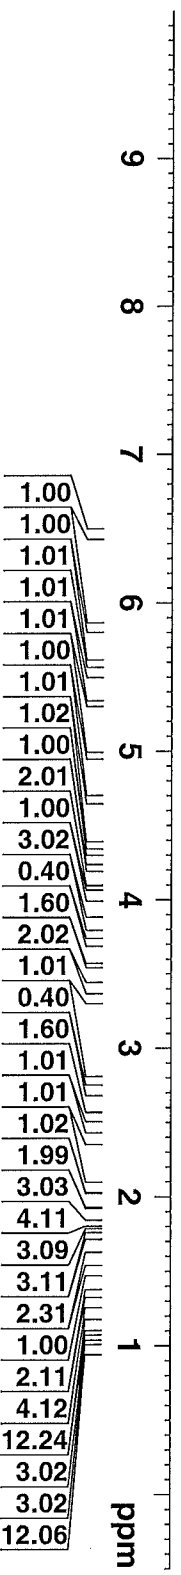

1.00  
1.00  
1.01  
1.01  
1.01  
1.01  
1.01  
1.01  
1.02  
1.00  
2.01  
1.00  
3.02  
0.40  
1.60  
2.02  
1.01  
0.40  
1.60  
1.01  
1.01  
1.02  
1.99  
3.03  
4.11  
3.09  
3.11  
2.31  
1.00  
2.11  
4.12  
12.24  
3.02  
3.02  
12.06

```

NAME          SUM-XIV-66-Ketone
EXPNO         1
PROCNO        1
Date_         20120223
Time          16.05
INSTRUM       spect
PROBHD        5 mm CPDCH 13C
PULPROG       zg30
TD            95236
SOLVENT       CDCl3
NS            32
DS            2
SWH           11904.762 Hz
FIDRES       0.125003 Hz
AQ           3.9999621 sec
RG           22.6
DW           42.000 usec
DE           6.50 usec
TE           298.3 K
D1           2.00000000 sec
TD0          1

===== CHANNEL f1 =====
NUC1          1H
P1           9.40 usec
PL1          -3.20 dB
PL1W         33.59817505 W
SFO1         700.1516910 MHz
SI           131072
SF           700.1471400 MHz
WDW          EM
SSB          0
LB           0.30 Hz
GB           0
PC           1.00
  
```

Ketone

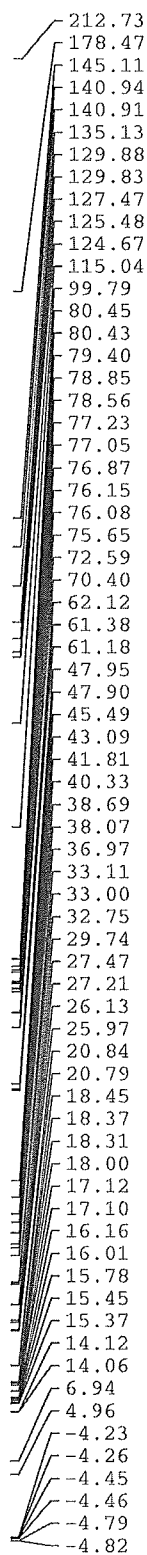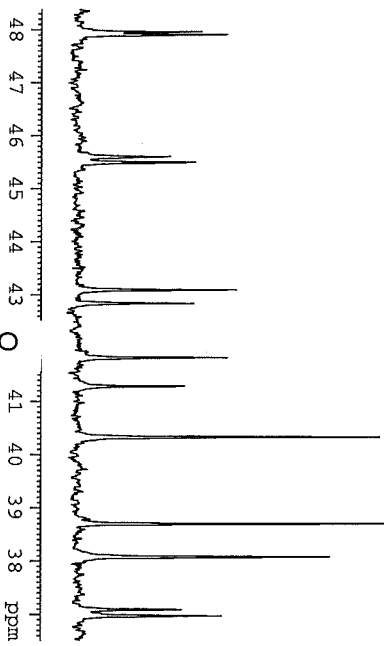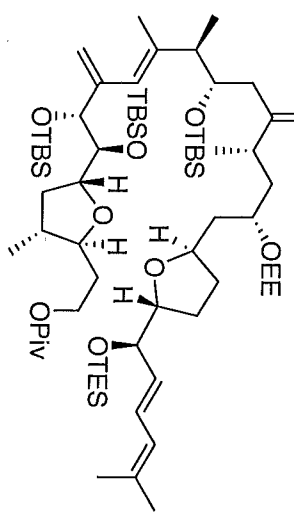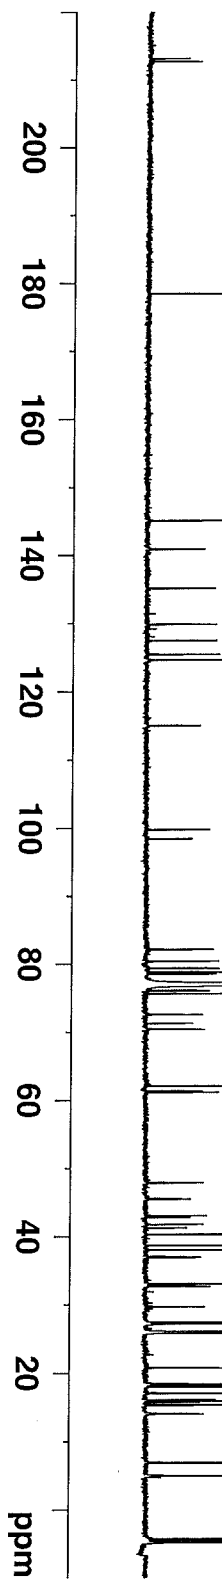

NAME SUD-XIV-66-Ketone

EXPNO 2  
 PROCNO 1  
 Date\_ 20120223  
 Time 16.21  
 INSTRUM spect  
 PROBD 5 mm CPDCH 13C  
 PULPROG zgpg30  
 TD 65536  
 SOLVENT CDCl3  
 NS 386  
 DS 4  
 SWH 41666.668 Hz  
 FIDRES 0.635783 Hz  
 AQ 0.7864820 sec  
 RG 203  
 DW 12.000 usec  
 DE 6.50 usec  
 TE 298.3 K  
 D1 2.00000000 sec  
 D11 0.03000000 sec  
 TD0 1

==== CHANNEL F1 =====  
 NUC1 13C  
 P1 9.00 usec  
 PL1 4.50 dB  
 PL1W 38.14553833 W  
 SFO1 176.0706238 MHz

==== CHANNEL F2 =====  
 CPDPRG2 waltz16  
 NUC2 1H  
 PCPD2 65.00 usec  
 PL2 -3.20 dB  
 PL12 13.60 dB  
 PL13 120.00 dB  
 PL2W 33.59817505 W  
 PL12W 0.70196527 W  
 PL13W 0.00000000 W  
 SFO2 700.1499406 MHz  
 SI 32768  
 SF 176.0521380 MHz  
 WDW EM  
 SSB 0  
 LB 3.00 Hz  
 GB 0  
 PC 1.40

A1dehyde

|       |
|-------|
| 9.826 |
| 7.288 |
| 6.462 |
| 5.844 |
| 5.829 |
| 5.605 |
| 5.329 |
| 4.978 |
| 4.675 |
| 4.388 |
| 4.386 |
| 4.381 |
| 4.163 |
| 4.085 |
| 4.016 |
| 4.002 |
| 3.938 |
| 3.737 |
| 3.732 |
| 3.648 |
| 3.549 |
| 3.539 |
| 3.493 |
| 3.483 |
| 2.649 |
| 2.554 |
| 2.496 |
| 1.970 |
| 1.881 |
| 1.830 |
| 1.796 |
| 1.777 |
| 1.293 |
| 1.211 |
| 1.025 |
| 1.016 |
| 0.974 |
| 0.973 |
| 0.912 |
| 0.897 |
| 0.896 |
| 0.627 |
| 0.120 |
| 0.081 |
| 0.043 |
| 0.008 |

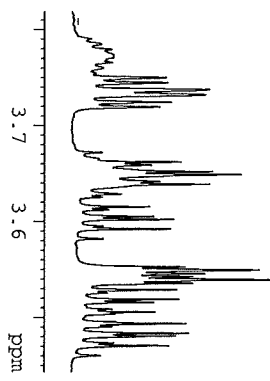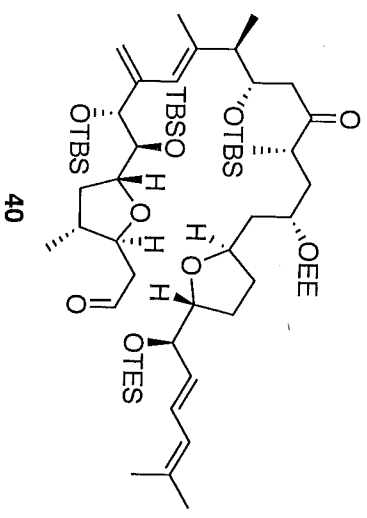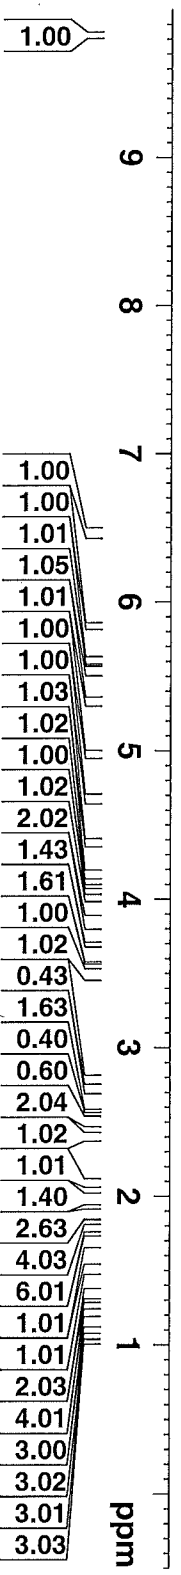

```

NAME          SUM-XV-36-Aldehyde
EXPNO         1
PROCNO        1
Date_         20120414
Time          2.16
INSTRUM       spect
PROBHD        5 mm CPDCH 13C
PULPROG       zg30
TD            95236
SOLVENT       CDCl3
NS            56
DS            2
SWH           11904.762 Hz
FIDRES        0.125003 Hz
AQ            3.9999621 sec
RG            22.6
DW            42.000 usec
DE            6.50 usec
TE            303.2 K
D1            2.00000000 sec
TD0           1

===== CHANNEL f1 =====
NUC1          1H
P1            9.40 usec
PL1          -3.20 dB
PL1W         33.59817505 W
SF01         700.1516910 MHz
SI           131072
SF           700.1471400 MHz
WDW          EM
SSB          0
LB           0.30 Hz
GB           0
PC           1.00
  
```

Aldehyde

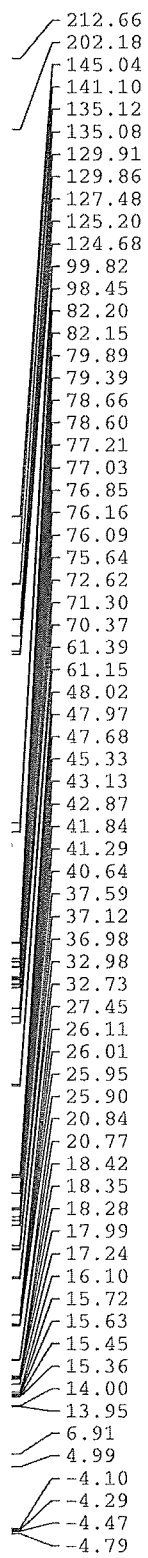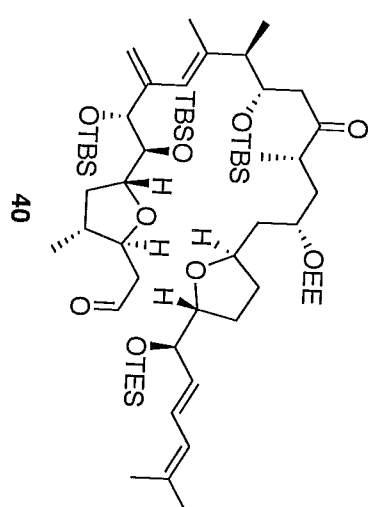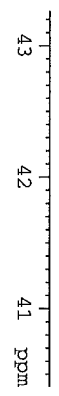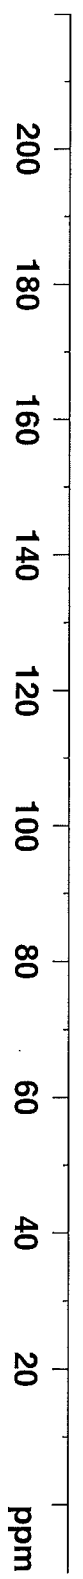

NAME SUM-XV-36-Aldehyde  
 EXPNO 2  
 PROCNO 1  
 Date\_ 20120414  
 Time 2.29  
 INSTRUM spect  
 PROBHD 5 mm CPDCH 13C  
 PULPROG zgpg30  
 TD 65536  
 SOLVENT CDCI3  
 NS 10120  
 DS 4  
 SWH 41666.668 Hz  
 FIDRES 0.635783 Hz  
 AQ 0.7864820 sec  
 RG 203  
 DW 12.000 usec  
 DE 16.50 usec  
 TE 303.2 K  
 D1 2.00000000 sec  
 D11 0.03000000 sec  
 TD0 15

==== CHANNEL F1 =====  
 NUC1 13C  
 P1 9.00 usec  
 PL1 4.50 dB  
 PL1W 38.14553833 W  
 SF01 176.0706238 MHz

==== CHANNEL F2 =====  
 CPDPRG2 waltz16  
 NUC2 1H  
 PCPD2 65.00 usec  
 PL2 -3.20 dB  
 PL12 13.60 dB  
 PL13 120.00 dB  
 PL2W 33.59817505 W  
 PL12W 0.70196527 W  
 PL13W 0.00000000 W  
 SF02 700.1499406 MHz  
 SI 32768  
 SF 176.0521380 MHz  
 WDW EM  
 SSB 0  
 LB 3.00 Hz  
 GB 0  
 PC 1.40

Carboxylic Acid

|       |
|-------|
| 7.288 |
| 6.463 |
| 6.461 |
| 5.844 |
| 5.828 |
| 5.601 |
| 5.352 |
| 5.001 |
| 4.677 |
| 4.172 |
| 4.125 |
| 3.945 |
| 3.650 |
| 3.579 |
| 3.484 |
| 2.678 |
| 2.477 |
| 2.467 |
| 2.132 |
| 2.124 |
| 1.973 |
| 1.881 |
| 1.877 |
| 1.827 |
| 1.796 |
| 1.777 |
| 1.707 |
| 1.516 |
| 1.459 |
| 1.445 |
| 1.299 |
| 1.292 |
| 1.229 |
| 1.212 |
| 1.107 |
| 1.062 |
| 1.052 |
| 1.031 |
| 0.973 |
| 0.920 |
| 0.910 |
| 0.899 |
| 0.627 |
| 0.615 |
| 0.120 |
| 0.031 |

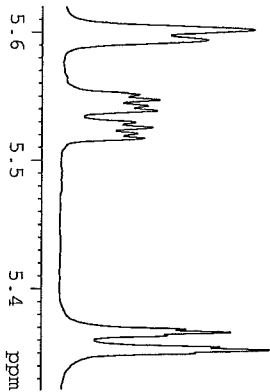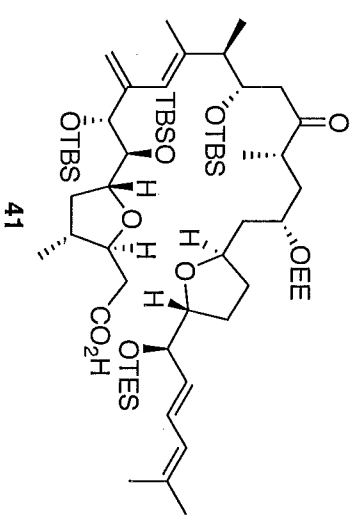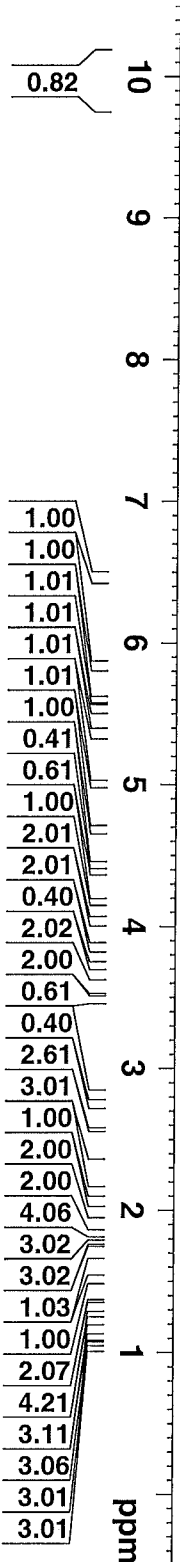

```

SUM-XV-37-Acid
NAME SUM-XV-37-Acid
EXPNO 1
PROCNO 1
Date_ 20120415
Time 4.16
INSTRUM spect
PROBHD 5 mm CPDCH 13C
PULPROG zg30
TD 95236
SOLVENT CDCl3
NS 72
DS 2
SWH 11904.762 Hz
FIDRES 0.125003 Hz
AQ 3.9999621 sec
RG 22.6
DW 42.000 usec
DE 6.50 usec
TE 303.2 K
D1 2.00000000 sec
TD0 1

===== CHANNEL f1 =====
NUC1 1H
P1 9.40 usec
PL1 -3.20 dB
PL1W 33.59817505 W
SF01 700.1516910 MHz
SI 131072
SF 700.1471400 MHz
WDW EM
SSB 0
LB 0.30 Hz
GB 0
PC 1.00
  
```

Carboxylic Acid

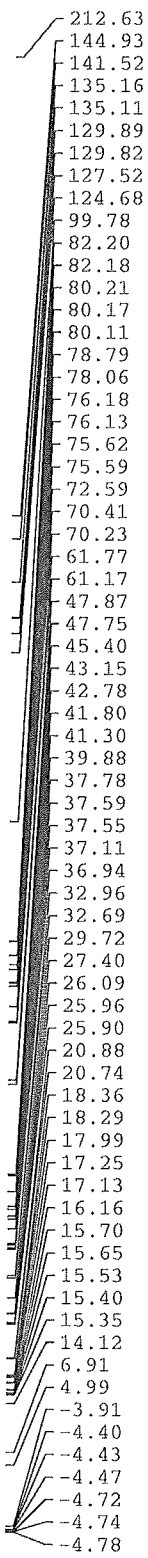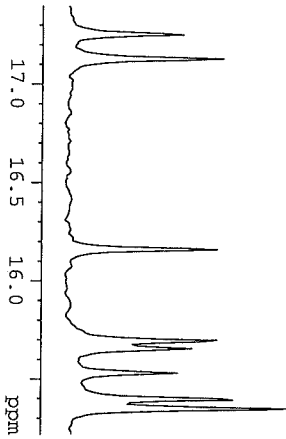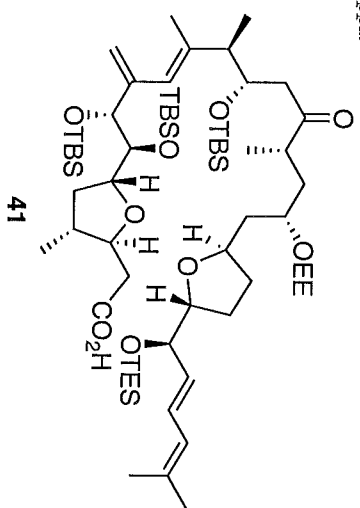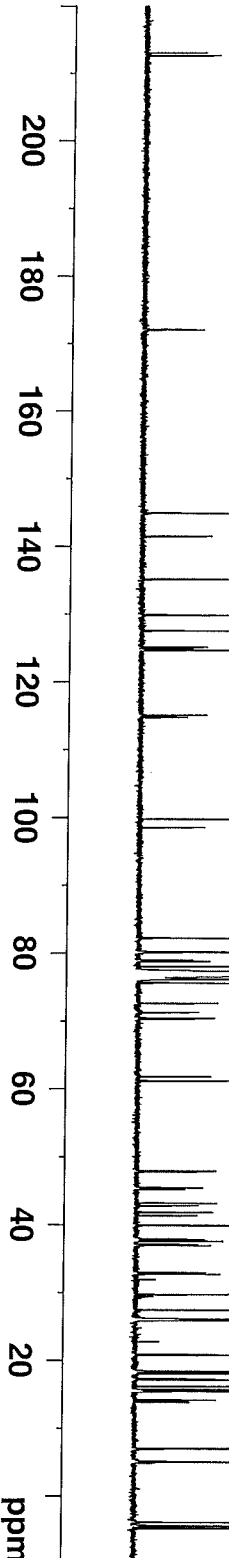

NAME SUM-XV-37-Acid  
 EXPNO 2  
 PROCNO 1  
 Date\_ 20120415  
 Time 4.30  
 INSTRUM spect  
 PROBD 5 mm CPDCH 13C  
 PULPROG zgpg30  
 TD 65536  
 SOLVENT CDCl3  
 NS 5720  
 DS 4  
 SWH 41666.668 Hz  
 FIDRES 0.635783 Hz  
 AQ 0.7864820 sec  
 RG 203  
 DW 12.000 usec  
 DE 16.50 usec  
 TE 303.2 K  
 D1 2.00000000 sec  
 D11 0.03000000 sec  
 TD0 15

==== CHANNEL F1 =====  
 NUC1 13C  
 P1 9.00 usec  
 PL1 4.50 dB  
 PL1W 38.14553833 W  
 SFO1 176.0706238 MHZ

==== CHANNEL F2 =====  
 CPDPRG2 waltz16  
 NUC2 1H  
 PCPD2 65.00 usec  
 PL2 -3.20 dB  
 PL12 13.60 dB  
 PL13 120.00 dB  
 PL12W 33.59817505 W  
 PL13W 0.70196527 W  
 SFO2 700.1499406 MHZ  
 SI 32768  
 SF 176.0521380 MHZ  
 WDW EM  
 SSB 0  
 LB 3.00 Hz  
 GB 0  
 PC 1.40



Macrolactone

|       |
|-------|
| 7.288 |
| 6.548 |
| 6.164 |
| 5.789 |
| 5.773 |
| 5.002 |
| 4.953 |
| 4.917 |
| 4.681 |
| 4.002 |
| 3.991 |
| 3.900 |
| 3.625 |
| 3.616 |
| 3.551 |
| 3.542 |
| 3.488 |
| 3.478 |
| 3.475 |
| 2.481 |
| 2.477 |
| 2.472 |
| 2.065 |
| 2.057 |
| 2.048 |
| 1.968 |
| 1.955 |
| 1.939 |
| 1.782 |
| 1.533 |
| 1.515 |
| 1.320 |
| 1.312 |
| 1.276 |
| 1.238 |
| 1.132 |
| 1.097 |
| 1.088 |
| 1.046 |
| 0.912 |
| 0.858 |
| 0.116 |
| 0.054 |
| 0.033 |
| 0.021 |
| 0.016 |

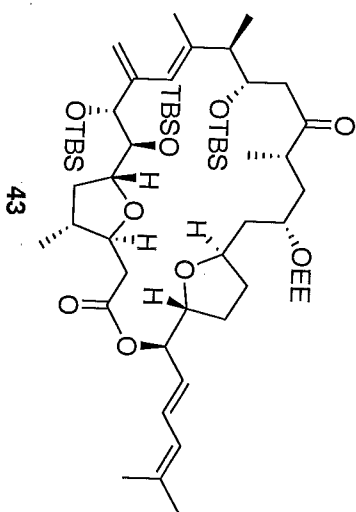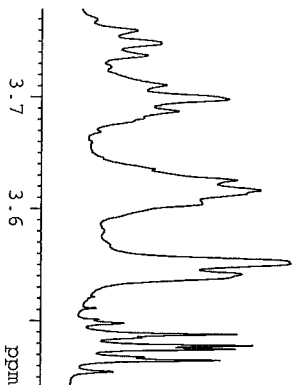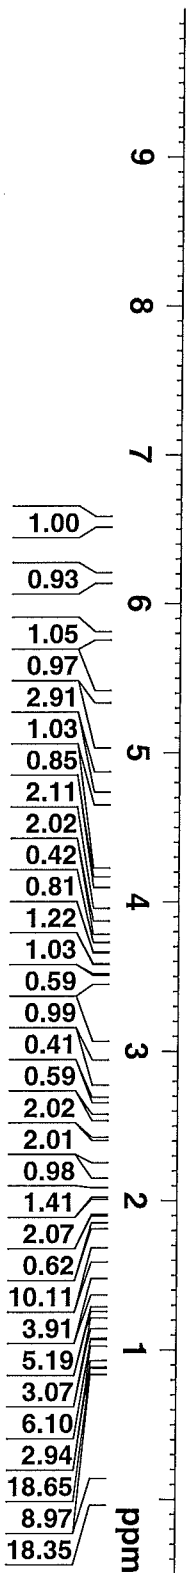

NAME STM-XIV-81-Macrolactonizati  
 EXPNO 1  
 PROCNO 1  
 Date\_ 20120218  
 Time\_ 1.50  
 INSTRUM spect  
 PROBHD 5 mm CPDCH 13C  
 PULPROG zg30  
 TD 95236  
 SOLVENT CDCl3  
 NS 100  
 DS 2  
 SWH 11904.762 Hz  
 FIDRES 0.125003 Hz  
 AQ 3.9999621 sec  
 RG 32  
 DW 42.000 usec  
 DE 6.50 usec  
 TE 298.3 K  
 D1 2.00000000 sec  
 TD0 1

===== CHANNEL f1 =====  
 NUCL 1H  
 P1 9.40 usec  
 PL -3.20 dB  
 P1LW 33.59817505 W  
 SFO1 700.1516910 MHz  
 SI 131072  
 SF 700.1471400 MHz  
 WDW EM  
 SSB 0  
 LB 0.30 Hz  
 GB 0  
 PC 1.00

Macrolactone

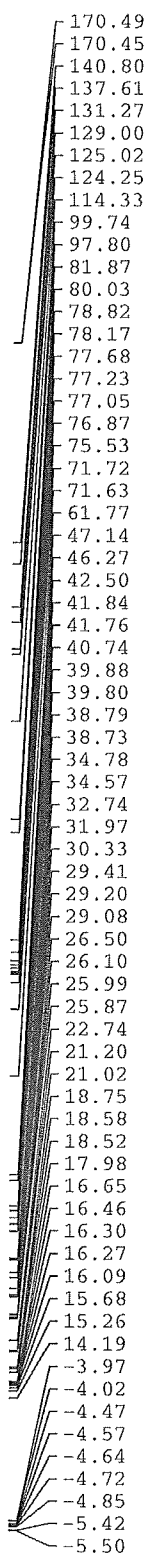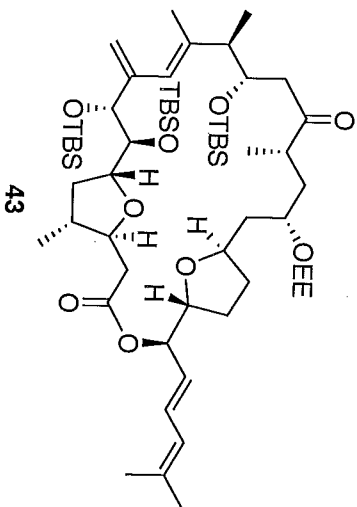

43

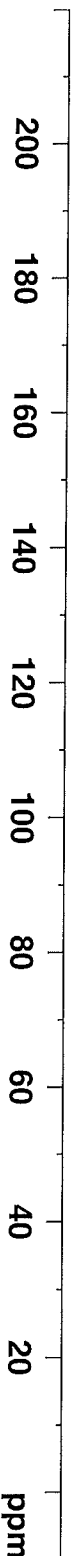

```

NAME          SUM-XV-09-Macrolactone
EXPNO         2
PROCNO        1
Date_         20120328
Time          23.01
INSTRUM       spect
PROBHD        5 mm CPDCH 13C
PULPROG       zgpg30
TD            65536
SOLVENT       CDCl3
NS            2955
DS            4
SWH           41666.668 Hz
FIDRES        0.635783 Hz
AQ            0.7864820 sec
RG            203
DW            12.000 usec
DE            16.50 usec
TE            298.2 K
D1            2.00000000 sec
D11           0.03000000 sec
TD0           1

===== CHANNEL f1 =====
NUC1          13C
P1            9.00 usec
PL1           4.50 dB
PL1W          38.14553833 W
SFO1         176.0706238 MHz

===== CHANNEL f2 =====
CPDPRG2      waltz16
NUC2          1H
PCPD2        65.00 usec
PL2          -3.20 dB
PL12         13.60 dB
PL13         120.00 dB
PL1W         33.59817505 W
PL12W        0.70196527 W
PL13W        0.00000000 W
SFO2         700.1499406 MHz
SI           32768
SF           176.0521380 MHz
WDW           EM
SSB           0
LB            3.00 Hz
GB            0
PC            1.40
  
```

Diketone

|       |
|-------|
| 7.288 |
| 6.559 |
| 6.544 |
| 6.538 |
| 6.522 |
| 5.782 |
| 5.766 |
| 5.129 |
| 5.051 |
| 4.953 |
| 4.065 |
| 3.960 |
| 3.552 |
| 2.984 |
| 2.849 |
| 2.622 |
| 2.617 |
| 2.601 |
| 2.597 |
| 2.433 |
| 2.005 |
| 1.909 |
| 1.901 |
| 1.892 |
| 1.799 |
| 1.783 |
| 1.774 |
| 1.645 |
| 1.641 |
| 1.639 |
| 1.635 |
| 1.632 |
| 1.568 |
| 1.563 |
| 1.556 |
| 1.551 |
| 1.538 |
| 1.148 |
| 1.116 |
| 1.106 |
| 1.036 |
| 0.907 |
| 0.095 |
| 0.086 |
| 0.065 |
| 0.035 |

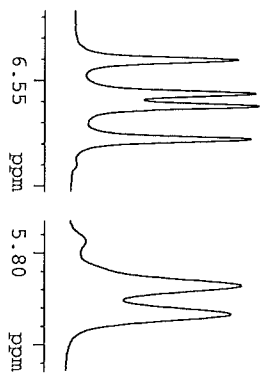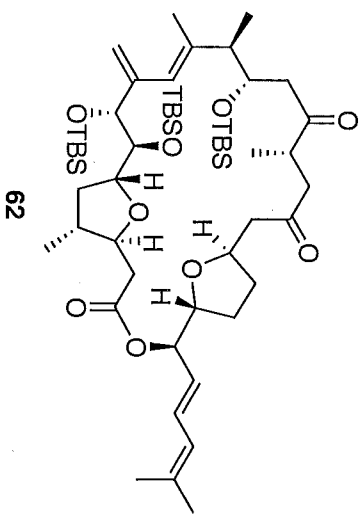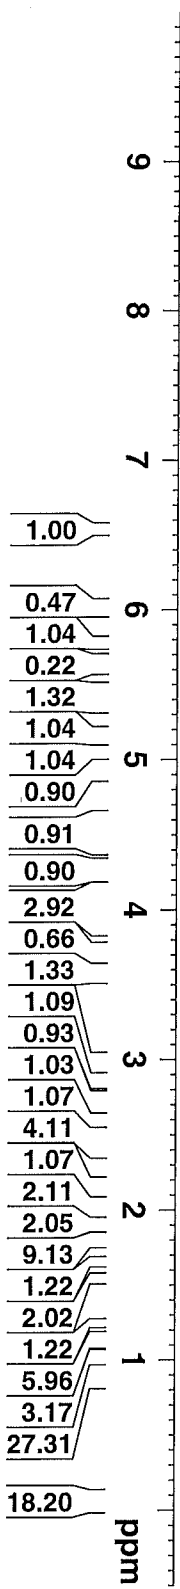

```

NAME SUM-XV-27-Diketone
EXPNO 1
PROCNO 1
Date_ 20120408
Time 1.41
INSTRUM spect
PROBHD 5 mm CPDCH 13C
PULPROG zg30
TD 95236
SOLVENT CDC13
NS 320
DS 2
SWH 11904.762 Hz
FIDRES 0.125003 Hz
AQ 3.9999621 sec
RG 25.4
DE 42.000 usec
TE 6.50 usec
D1 303.2 K
D0 2.00000000 sec
===== CHANNEL f1 =====
NUC1 1H
P1 9.40 usec
PL1 -3.20 dB
PL1W 33.59817505 W
SF01 700.1516910 MHz
SI 131072
SF 700.1471400 MHz
WDW EM
SSB 0
LB 0.30 Hz
GB 0
PC 1.00
  
```



F 14122

Amphidinolide F

|       |
|-------|
| 6.549 |
| 6.533 |
| 6.025 |
| 5.229 |
| 5.201 |
| 5.199 |
| 4.988 |
| 4.122 |
| 4.111 |
| 3.845 |
| 3.841 |
| 3.104 |
| 3.079 |
| 2.772 |
| 2.759 |
| 2.748 |
| 2.737 |
| 2.725 |
| 2.580 |
| 2.576 |
| 2.561 |
| 2.558 |
| 2.548 |
| 2.533 |
| 2.528 |
| 2.522 |
| 2.518 |
| 2.374 |
| 2.319 |
| 2.308 |
| 2.131 |
| 2.122 |
| 2.113 |
| 1.796 |
| 1.781 |
| 1.750 |
| 1.748 |
| 1.520 |
| 1.502 |
| 1.490 |
| 1.126 |
| 1.116 |
| 1.067 |
| 1.057 |
| 1.030 |
| 1.020 |

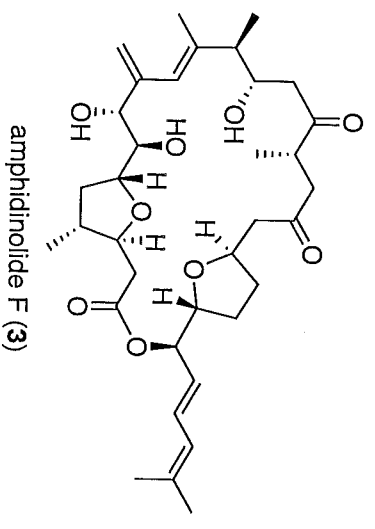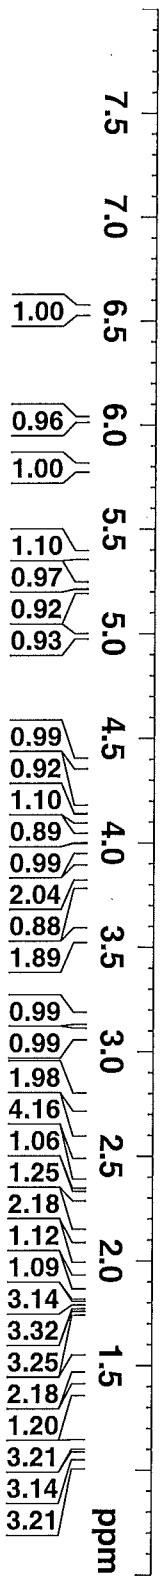

SUM-XV-40-Amphidinolide

|         |                |
|---------|----------------|
| NAME    | 1              |
| EXPNO   | 1              |
| PROCNO  | 1              |
| Date_   | 20120417       |
| Time    | 23.44          |
| INSTRUM | spect          |
| PROBHD  | 5 mm CPDCH 13C |
| PULPROG | zg30           |
| TD      | 95236          |
| SOLVENT | CDCl3          |
| NS      | 320            |
| DS      | 2              |
| SWH     | 11904.762 Hz   |
| FIDRES  | 0.125003 Hz    |
| AQ      | 3.999621 sec   |
| RG      | 25.4           |
| DW      | 42.000 usec    |
| DE      | 6.50 usec      |
| TE      | 303.2 K        |
| D1      | 2.00000000 sec |
| TD0     | 1              |

==== CHANNEL f1 =====

|      |                 |
|------|-----------------|
| NUC1 | 1H              |
| P1   | 9.40 usec       |
| PL1  | -3.20 dB        |
| PL1W | 33.59817505 W   |
| SFO1 | 700.1516910 MHz |
| SI   | 131072          |
| SF   | 700.1471400 MHz |
| WDW  | EM              |
| SSB  | 0               |
| LB   | 0.30 Hz         |
| GB   | 0               |
| PC   | 1.00            |

Amphidinolide F

|        |        |       |       |
|--------|--------|-------|-------|
| 213.77 | 144.45 | 81.45 | 49.38 |
| 207.77 | 140.04 | 79.90 | 48.57 |
|        | 138.29 | 78.94 | 46.03 |
|        | 132.06 | 77.84 | 45.55 |
|        | 124.52 | 76.51 | 42.79 |
|        | 124.19 | 75.01 | 39.79 |
|        | 124.04 | 70.62 | 38.70 |
|        | 116.11 |       | 36.77 |
|        |        |       | 31.98 |
|        |        |       | 28.43 |
|        |        |       | 26.08 |
|        |        |       | 18.51 |
|        |        |       | 16.24 |
|        |        |       | 15.53 |
|        |        |       | 15.40 |

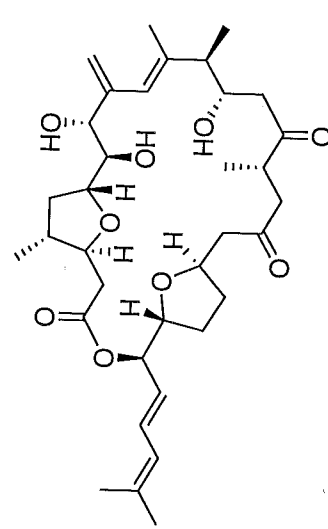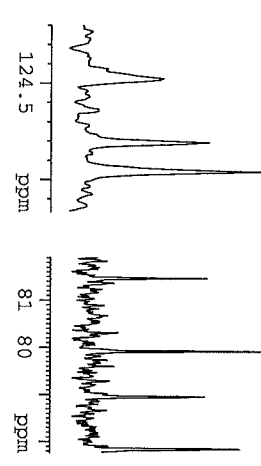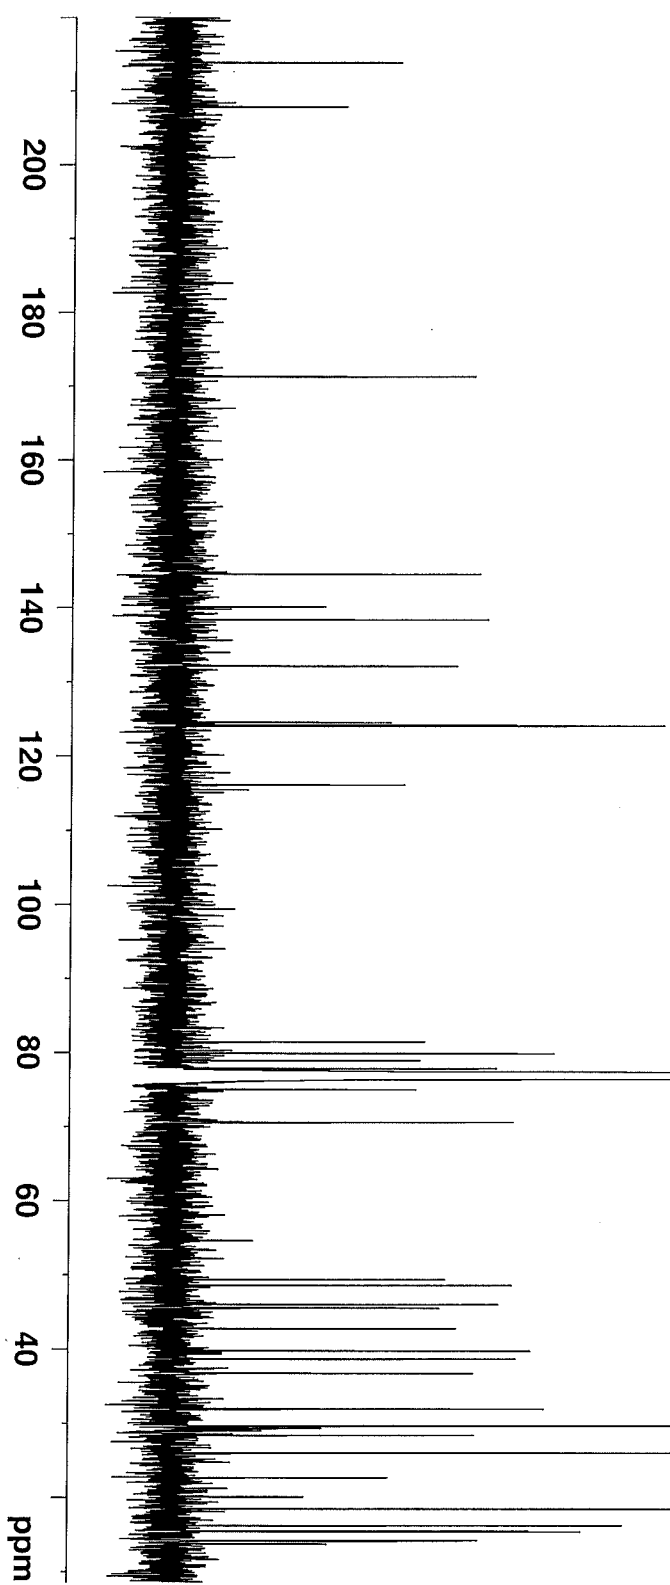

NAME SUM-XV-40-Amphidinolide  
 EXPTNO 3  
 PROCNO 1  
 Date\_ 20120418  
 Time 1.39  
 INSTRUM spect  
 PROBD 5 mm CPDCH 13C  
 PULPROG zgpg30  
 TD 65536  
 SOLVENT CDCl3  
 NS 15028  
 DS 4  
 SWH 41666.668 Hz  
 FIDRES 0.635783 Hz  
 AQ 0.7864820 sec  
 RG 203  
 DW 12.000 usec  
 DE 16.50 usec  
 TE 303.2 K  
 D1 2.00000000 sec  
 D11 0.03000000 sec  
 TD0 75

==== CHANNEL f1 =====  
 NUCL 13C  
 P1 9.00 usec  
 PL1 4.50 dB  
 PL1W 38.14553833 W  
 SFO1 176.0706238 MHz

==== CHANNEL f2 =====  
 CPDPRG2 wait216  
 NUCL 1H  
 PCPD2 65.00 usec  
 PL2 -3.20 dB  
 PL12 13.60 dB  
 PL13 120.00 dB  
 PL1Z 33.59817505 W  
 PL12W 0.70196527 W  
 PL13W 0.00000000 W  
 SFO2 700.1499406 MHz  
 SI 32768  
 SF 176.0521380 MHz  
 WDW EM  
 SSB 0  
 LB 3.00 Hz  
 GB 0  
 PC 1.40

Comparison of  $^1\text{H}$  data of amphidinolide F (**3**)

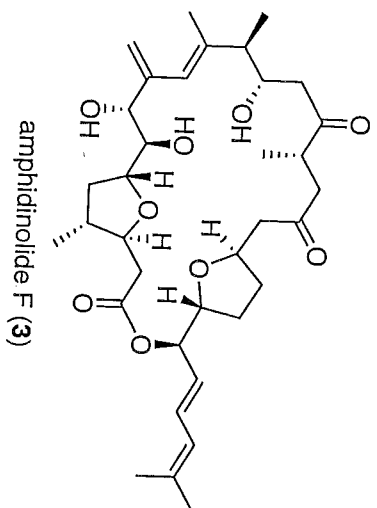

Synthetic **3** ( $\text{CDCl}_3$ ,  
700 MHz,  
Concentration 1.4  
mg of **3** in 0.18 mL  
 $\text{CDCl}_3$ ).

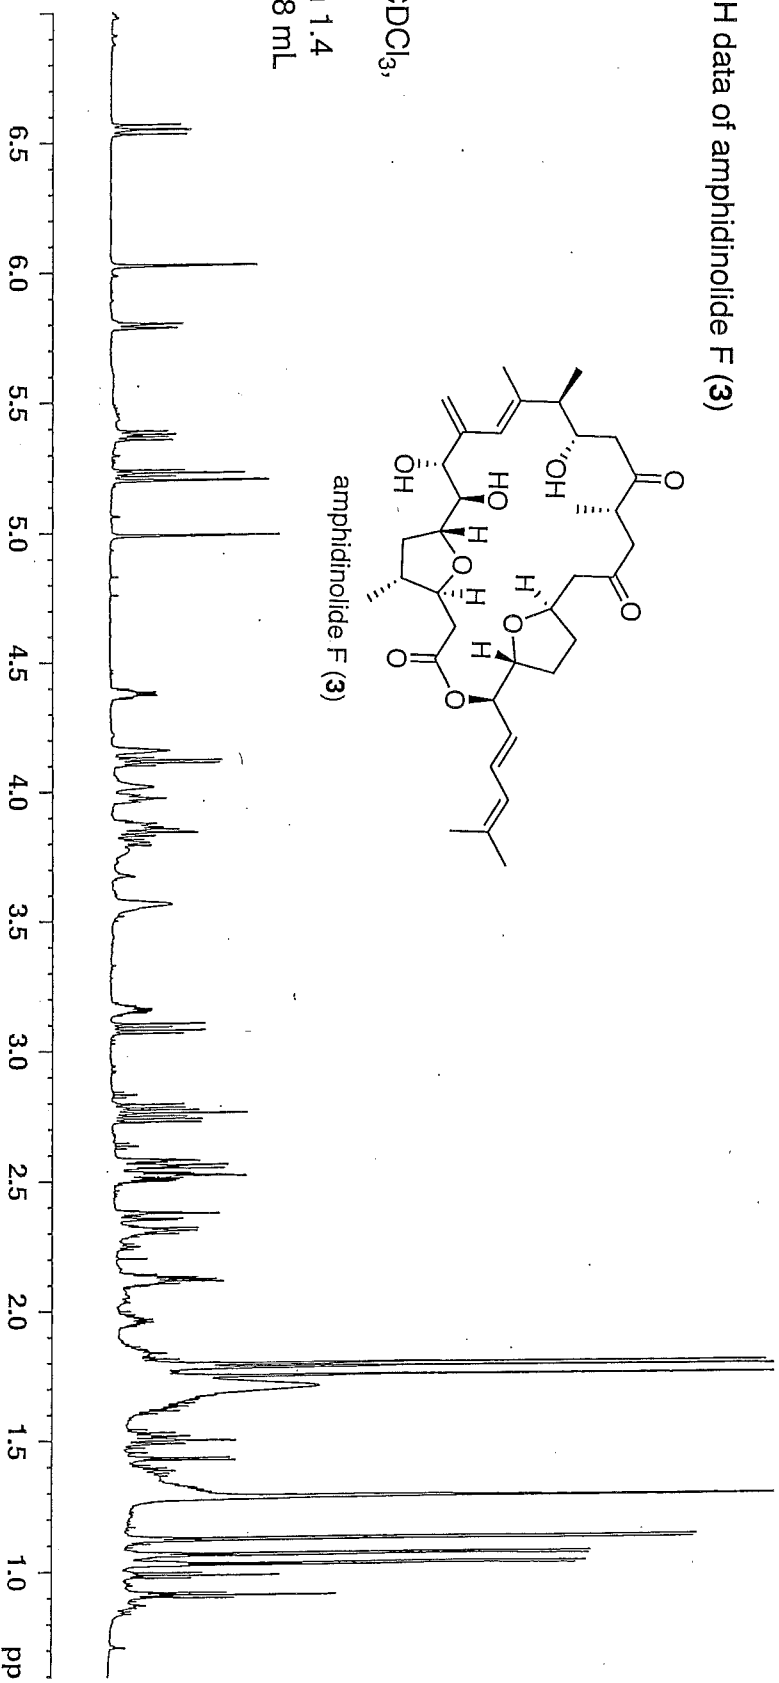

Synthetic **3** ( $\text{CDCl}_3$ ,  
700 MHz,  
Concentration 0.4  
mg of **3** in 0.18 mL  
 $\text{CDCl}_3$ ).

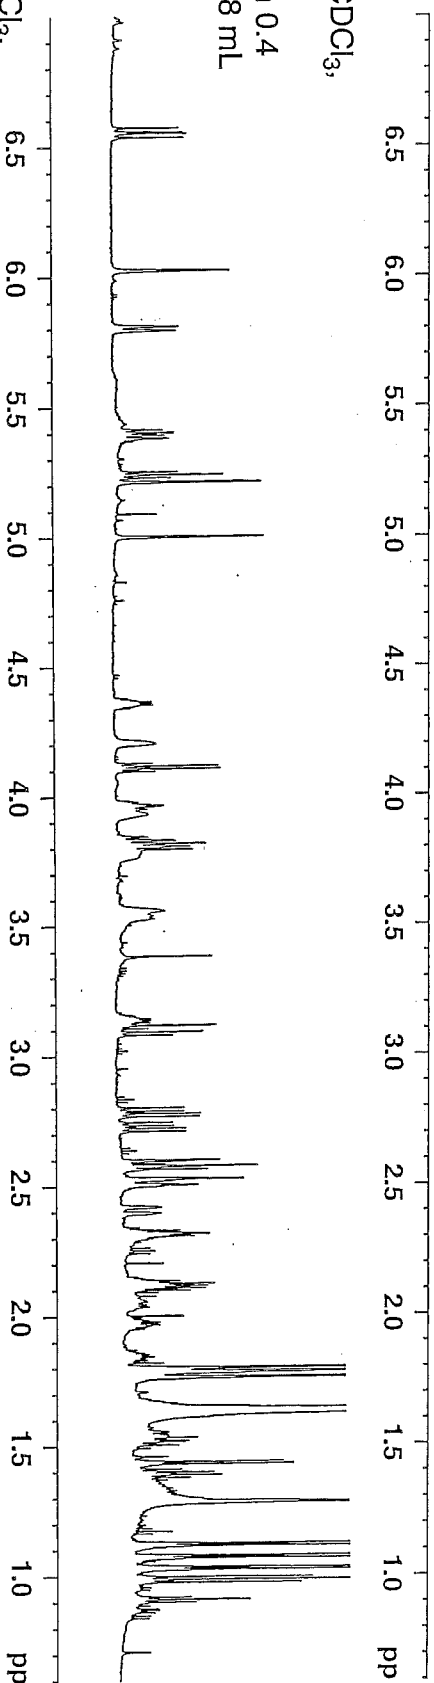

Natural **3** ( $\text{CDCl}_3$ ,  
500 MHz,  
concentration  
unknown)  
Kobayashi, J. *et al.*  
J. Antibiot. **1991**, *44*,  
1259-1261.

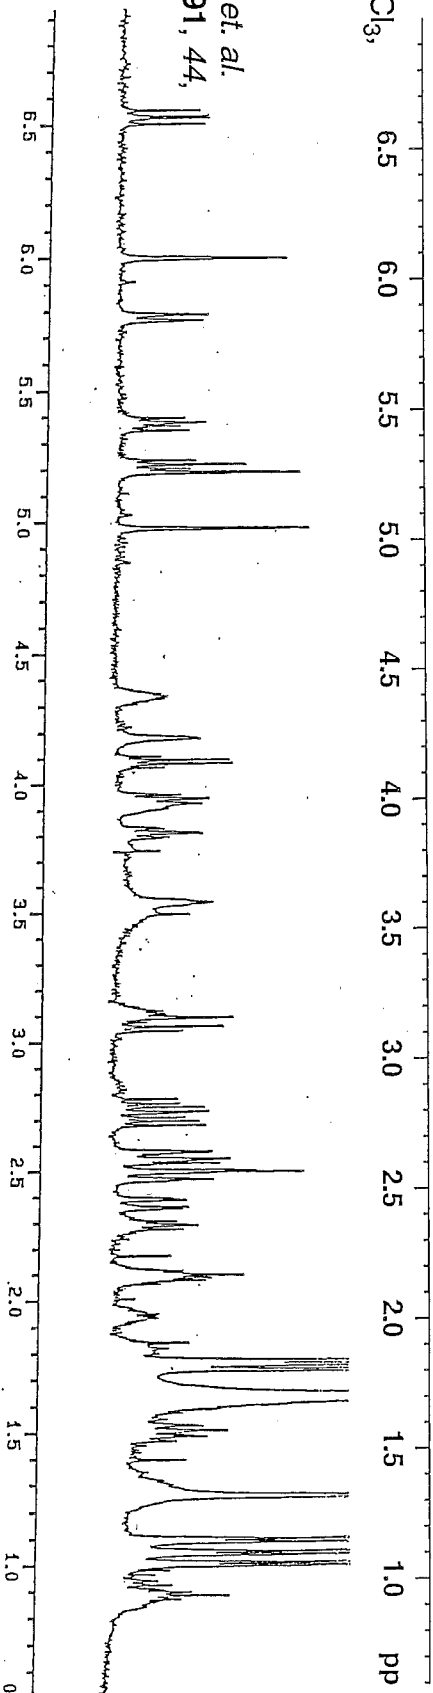

Comparison of  $^{13}\text{C}$  data of amphidinolide F (**3**)

| No. | Synthetic <b>3</b><br>(176 MHz, $\text{CDCl}_3^{\text{a}}$ ) | Natural <b>3</b> <sup>b</sup><br>(125 MHz, $\text{CDCl}_3$ ) |
|-----|--------------------------------------------------------------|--------------------------------------------------------------|
| 1   | 171.22                                                       | 171.16                                                       |
| 2   | 38.70                                                        | 38.65                                                        |
| 3   | 81.45                                                        | 81.26                                                        |
| 4   | 39.79                                                        | 39.67                                                        |
| 5   | 36.77                                                        | 36.81                                                        |
| 6   | 78.94                                                        | 79.08                                                        |
| 7   | 76.51                                                        | 76.71                                                        |
| 8   | 76.51                                                        | 76.71                                                        |
| 9   | 144.45                                                       | 144.37                                                       |
| 10  | 124.52                                                       | 124.62                                                       |
| 11  | 140.04                                                       | 140.00                                                       |
| 12  | 49.38                                                        | 49.46                                                        |
| 13  | 70.62                                                        | 70.50                                                        |
| 14  | 45.55                                                        | 45.65                                                        |
| 15  | 213.77                                                       | 213.58                                                       |
| 16  | 42.79                                                        | 42.93                                                        |
| 17  | 46.03                                                        | 45.81                                                        |
| 18  | 207.77                                                       | 207.47                                                       |
| 19  | 48.57                                                        | 48.45                                                        |
| 20  | 75.01                                                        | 74.82                                                        |
| 21  | 31.98                                                        | 31.84                                                        |
| 22  | 28.43                                                        | 28.46                                                        |
| 23  | 79.90                                                        | 79.87                                                        |
| 24  | 77.84                                                        | 77.93                                                        |
| 25  | 124.04                                                       | 123.97                                                       |
| 26  | 132.06                                                       | 132.09                                                       |
| 27  | 124.19                                                       | 124.06                                                       |
| 28  | 138.29                                                       | 138.25                                                       |
| 29  | 26.08                                                        | 26.00                                                        |
| 30  | 18.51                                                        | 18.43                                                        |
| 31  | 15.53                                                        | 15.39                                                        |
| 32  | 116.11                                                       | 116.16                                                       |
| 33  | 13.77                                                        | 13.94                                                        |
| 34  | 15.40                                                        | 15.29                                                        |
| 35  | 16.24                                                        | 16.20                                                        |

[a] Concentration 1.4 mg of **3** in 0.18 mL  $\text{CDCl}_3$ . [b] J. Kobayashi, M. Tsuda, M. Ishibashi, H. Shigemori, T. Yamasu, H. Hirota, T. Sasaki, *J. Antibiot.* **1991**, *44*, 1259-1261.
